# Supplementary material for: Molecular evidence of hybridization between pig and human Ascaris indicates an interbred species complex infecting humans
Source: eLife. 2020 Nov 6;9:e61562. doi: 10.7554/eLife.61562 (PMC7647404; doi:10.7554/eLife.61562)
Supplement: Supplementary file 2. — While ~94.6% of the genes can be transferred to both genomes, over 20% of the transferred genes are only partial matches and are fragmented supporting the view that the de novo and semi de novo A. lumbricoides assemblies are highly fragmented. [file elife-61562-supp2.xlsx]

## Sheet: all-tables
			Annotation											TMHMM								SignalP						SECRETOMEP			PSORT2	ProP-Furin	PFAM		PANTHER					GPI Anchor?	GPCRHMM			Kinannote				Allergenicity
S.No.	Link to Peptide	Description	Comments	Functional Class	Base Func	e-value	First residue	Seq size	%X	DP's	Increased AA	Cys number	%X	TMHMM result	Lenght	Predicted helices	% membrane	% outside	% inside	Possible GPI?	Length of peptide after last membrane helix	SigP Result	Cleavage Position	MW	pI	Mature MW	pI	NN-score	Odds	Weighted by prior			Pfam ID	Pfam description	PANTHER ID	e-value	InterPro			Prediction	global	local	pred	hmm score	hmm evalue	Score	Name	Allerdictor SVM Score	Allerdictor Probability
1	AgB01_g001_t01	hypothetical_protein	Unknown product	Unknown			M	68	0	0		0	0	ExpAA=0.04 First60=0.03 PredHel=0 Topology=o	68	0						CYT		7.835	6.06			0.873	5.006	0.01	nuc						AgB01_g001_t01-IPRSCAN			N	Too short sequence	-	No					-0.90064	0.00967397
2	AgB01_g002_t01	methyltransferase-like_protein_13	Unknown product	Unknown			M	361	0	1		9	0	ExpAA=18.96 First60=18.86 PredHel=1 Topology=i7-25o	361	1	5	93.1	1.9		336	CYT		40.479	6.61			0.601	1.425	0.003	cyt				PTHR12176:SF48	3.2e-32	AgB01_g002_t01-IPRSCAN	IPR029063	S-adenosyl-L-methionine-dependentmethyltransferase	N	-174.79	-	No					-0.94031	0.0077975
3	AgB01_g003_t01	methyltransferase-like_protein_13	Unknown product	Unknown			F	145	0.689655	0	X(101.56)	5	0.689655	ExpAA=0.00 First60=0.00 PredHel=0 Topology=o	145	0						CYT		16.467	6.11			0.722	1.888	0.004	cyt	LPKRPFR|SV 0.640 *ProP*			PTHR12176:SF48	1.5e-22	AgB01_g003_t01-IPRSCAN	IPR029063	S-adenosyl-L-methionine-dependentmethyltransferase	N	Too short sequence	-	No					-0.983102	0.00617668
4	AgB01_g004_t01	REST_corepressor	rest corepressor - probable fragment	Uncharacterized	NR	3e-99	M	226	0	0		13	0	ExpAA=0.20 First60=0.01 PredHel=0 Topology=o	226	0						CYT		26.174	9.89			0.626	2.035	0.004	nuc	NCSRVRR|YI 0.732 *ProP*					AgB01_g004_t01-IPRSCAN	IPR017884; IPR009057	SANTdomain; Homeobox-likedomainsuperfamily	N	-220.98	-	No					-0.956737	0.00713061
5	AgB01_g005_t01	methyltransferase-like_protein_13	Unknown product	Unknown			R	199	0	0		3	0	ExpAA=0.30 First60=0.00 PredHel=0 Topology=o	199	0						CYT		22.589	4.99			0.633	3.152	0.006	cyt		PF01564	Spermine/spermidine synthase domain	PTHR12176:SF48	6.1e-31	AgB01_g005_t01-IPRSCAN	IPR029063	S-adenosyl-L-methionine-dependentmethyltransferase	N	Too short sequence	-	No					-0.964726	0.00682708
6	AgB01_g006_t01	histidine_acid_phosphatase_family_protein	Unknown product	Unknown			G	117	0	0	W(3.06)	2	0	ExpAA=0.00 First60=0.00 PredHel=0 Topology=o	117	0						CYT		13.496	4.85			0.248	0.472	0.001	nuc				PTHR11567	1.5e-43	AgB01_g006_t01-IPRSCAN	IPR029033; IPR029033	Histidinephosphatasesuperfamily	N	Too short sequence	-	No					-1.00246	0.00555822
7	AgB01_g007_t02	methyltransferase-like_protein_13	Unknown product	Unknown			F	112	0	0		2	0	ExpAA=0.00 First60=0.00 PredHel=0 Topology=o	112	0						CYT		12.898	5.89			0.52	1.169	0.002	cyt				PTHR12176:SF48	8.9e-20	AgB01_g007_t02-IPRSCAN	IPR029063	S-adenosyl-L-methionine-dependentmethyltransferase	N	Too short sequence	-	No					-0.84772	0.012889
8	AgB01_g008_t02	hypothetical_protein	Unknown product	Unknown			M	86	0	0		4	0	ExpAA=15.24 First60=13.29 PredHel=0 Topology=i	86	0						CYT		9.957	9.3			0.846	4.28	0.009	mit						AgB01_g008_t02-IPRSCAN			N	Too short sequence	-	No					-0.940826	0.00777563
9	AgB01_g009_t05	aquaporin-10	aquaporin-10 - 6 predicted membrane helices	Transporters / membrane	NR	0	M	307	0	0		5	0	ExpAA=137.25 First60=21.06 PredHel=6 Topology=i38-60o70-92i112-134o166-188i201-223o250-272i	307	6	43	22.5	34.5			CYT		33.383	8.26			0.632	2.057	0.004	end		PF00230	Major intrinsic protein	PTHR43829:SF4	1.3e-115	AgB01_g009_t05-IPRSCAN	IPR023271; IPR000425; IPR022357; IPR000425	Aquaporin-like; Majorintrinsicprotein; Majorintrinsicprotein,conservedsite	N	-54.63	-	No					-0.907745	0.00930778
10	AgB01_g010_t04	hypothetical_protein	hypothetical secreted protein precursor	Secreted / Unknown			M	255	0	0	W(3.16)	14	0	ExpAA=26.67 First60=26.17 PredHel=1 Topology=i21-38o	255	1	6.7	85.1	8.2		217	SIG	20-21	30.662	5.54	28.104	5.31	0.672	1.898	0.004	end						AgB01_g010_t04-IPRSCAN			N	-216.18	-	No					-0.975181	0.00644913
11	AgB01_g011_t01	p40	Cytosolic motility protein	Uncharacterized	CDD	0	R	401	0	1	W(3.8)	8	0	ExpAA=0.03 First60=0.03 PredHel=0 Topology=o	401	0						BL	14-15	45.085	6.52	43.394	6.06	0.312	0.584	0.001	cyt		PF12150	Cytosolic motility protein	PTHR31578	1.1e-156	AgB01_g011_t01-IPRSCAN	IPR021010; IPR021010	Cytosolicmotilityprotein	N	-177.54	-	No					-0.999058	0.00566216
12	AgB01_g012_t01	Nuclear_hormone_receptor_family_member_nhr-91	Nuclear hormone receptor family member nhr-91	Signal Transduction	NR	0	M	562	0	2		16	0	ExpAA=0.44 First60=0.00 PredHel=0 Topology=o	562	0						CYT		62.317	8.79			0.519	1.07	0.002	nuc		PF00104; PF00105	Ligand-binding domain of nuclear hormone receptor; Zinc finger, C4 type (two domains)	PTHR24083	3.7e-100	AgB01_g012_t01-IPRSCAN	IPR001723; IPR013088; IPR000536; IPR001628; IPR035500; IPR001628	Nuclearhormonereceptor; Zincfinger,NHR/GATA-type; Nuclearhormonereceptor,ligand-bindingdomain; Zincfinger,nuclearhormonereceptor-type; Nuclearhormonereceptor-likedomainsuperfamily	N	-133.49	-	No					-0.99452	0.005804
13	AgB01_g014_t01	hypothetical_protein	Unknown product	Unknown			M	78	0	0	I(3.14)	1	0	ExpAA=0.21 First60=0.21 PredHel=0 Topology=o	78	0						CYT		9.376	9.36			0.799	3.406	0.007	nuc						AgB01_g014_t01-IPRSCAN			N	Too short sequence	-	No					-0.718571	0.0258258
14	AgB01_g015_t01	hypothetical_protein	hypothetical secreted protein precursor	Secreted / Unknown			M	86	0	0		1	0	ExpAA=19.71 First60=19.71 PredHel=1 Topology=o10-32i	86	1	25.6	11.6	62.8		54	SIG	26-27	10.062	9.5	7.229	9.51	0.542	1.75	0.004	nuc						AgB01_g015_t01-IPRSCAN			N	Too short sequence	-	No					-1.02209	0.00499372
15	AgB01_g016_t01	calponin-like_protein_ov9m	Calponin homolog OV9M	Cytoskeletal	SWISSP	3e-29	M	412	0	1		2	0	ExpAA=0.00 First60=0.00 PredHel=0 Topology=o	412	0						CYT		46.553	4.91			0.043	0.109	0	nuc		PF00402; PF00402; PF00402	Calponin family repeat; Calponin family repeat; Calponin family repeat	PTHR18959	2.1e-177	AgB01_g016_t01-IPRSCAN	IPR000557; IPR000557	Calponinrepeat	N	-162.36	-	No					-0.97966	0.00629362
16	AgB01_g017_t02	Uncharacterized_protein_C53C9.2	Unknown product	Unknown			M	51	0	0	W(3.51)	1	0	ExpAA=20.18 First60=20.18 PredHel=1 Topology=o20-42i	51	1	43.1	39.2	17.6		9	CYT		6.119	10.44			0.14	0.282	0.001	mit						AgB01_g017_t02-IPRSCAN			N	Too short sequence	-	No					-0.994546	0.00580318
17	AgB01_g018_t02	Enoyl-CoA_hydratase	enoyl-CoA hydratase mitochondrial	Energy Metabolism	SWISSP	0	M	292	0	0		5	0	ExpAA=0.26 First60=0.01 PredHel=0 Topology=o	292	0						CYT		31.686	8.51			0.873	4.873	0.01	mit	GTQRWPR|AA 0.686 *ProP*	PF00378	Enoyl-CoA hydratase/isomerase	PTHR11941:SF31	6.3e-111	AgB01_g018_t02-IPRSCAN	IPR029045; IPR001753; IPR018376; IPR014748	ClpP/crotonase-likedomainsuperfamily; Enoyl-CoAhydratase/isomerase; Enoyl-CoAhydratase/isomerase,conservedsite; Enoyl-CoAhydratase,C-terminal	N	-164.19	-	No					-0.960433	0.00698853
18	AgB01_g019_t01	Valyl-tRNA_synthetase	valyl-tRNA synthetase - probable fragment	Protein Synthesis	NR	0	F	796	0	4		11	0	ExpAA=0.01 First60=0.00 PredHel=0 Topology=o	796	0						CYT		90.629	8.63			0.179	0.352	0.001	cyt		PF00133	tRNA synthetases class I (I, L, M and V)	PTHR11946:SF54	0	AgB01_g019_t01-IPRSCAN	IPR009008; IPR002300; IPR002303; IPR001412; IPR014729; IPR014729	Valyl/Leucyl/Isoleucyl-tRNAsynthetase,editingdomain; Aminoacyl-tRNAsynthetase,classIa; Valine-tRNAligase; Aminoacyl-tRNAsynthetase,classI,conservedsite; Rossmann-likealpha/beta/alphasandwichfold	N	-203.68	-	No					-1.03104	0.00475561
19	AgB01_g020_t02	Cap-specific_mRNA_(nucleoside-2'-O-)-methyltransferase_2	Cap-specific mRNA (nucleoside-2'-O-)-methyltransferase 2 - probable fragment	Transcription Machinery	NR	0	R	365	0	1		10	0	ExpAA=0.06 First60=0.00 PredHel=0 Topology=o	365	0						CYT		42.52	5.21			0.622	1.535	0.003	cyt		PF01728	FtsJ-like methyltransferase	PTHR16121	2.3e-68	AgB01_g020_t02-IPRSCAN	IPR025807; IPR029063; IPR002877	Adrift-typeribose2-O-methyltransferasedomain; S-adenosyl-L-methionine-dependentmethyltransferase; RibosomalRNAmethyltransferaseFtsJdomain	N	-134.06	-	No					-0.987614	0.00602667
20	AgB01_g021_t01	Cap-specific_mRNA_(Nucleoside-2'-O-)-methyltransferase_2	Unknown product	Unknown			M	104	0	0		4	0	ExpAA=0.04 First60=0.01 PredHel=0 Topology=o	104	0						CYT		12.374	6.88			0.923	6.468	0.013	nuc						AgB01_g021_t01-IPRSCAN			N	Too short sequence	-	No					-0.877696	0.0109567
21	AgB01_g022_t01	hypothetical_protein	Mucin related 11Da - chorion-containing eggshell formation - chorion - extracellular matrix - extracellular matrix structural constituent - probable fragment	Extracellular Matrix	GO	2e-12	M	443	0.225734	0	T(3.07)X(33.24)	2	0.225734	ExpAA=0.87 First60=0.87 PredHel=0 Topology=o	443	0						CYT		47.827	4.6			0.538	1.191	0.002	nuc						AgB01_g022_t01-IPRSCAN			N	-153.8	-	No					-0.937005	0.00793898
22	AgB01_g023_t02	Protein_phosphatase_1L	BPTI/Kunitz family of serine protease inhibitors - signalP detected	Secreted / Protease Inhibitor / Kunitz	SMART	4e-13	M	451	0	3	C(3.36)	36	0	ExpAA=18.49 First60=18.49 PredHel=1 Topology=i3-25o	451	1	4.9	94.5	0.7		426	SIG	16-17	50.166	8.17	48.315	8.18	0.774	3.336	0.007	exc	NEKRCKK|FI 0.511 *ProP*	PF14625; PF14625; PF14625; PF00014; PF00014; PF00014	Lustrin, cysteine-rich repeated domain; Lustrin, cysteine-rich repeated domain; Lustrin, cysteine-rich repeated domain; Kunitz/Bovine pancreatic trypsin inhibitor domain; Kunitz/Bovine pancreatic trypsin inhibitor domain; Kunitz/Bovine pancreatic trypsin inhibitor domain	PTHR10083	4.1e-91	AgB01_g023_t02-IPRSCAN	IPR036880; IPR006150; IPR002223; IPR028150; IPR002223	PancreatictrypsininhibitorKunitzdomainsuperfamily; Cysteine-richrepeat; PancreatictrypsininhibitorKunitzdomain; Lustrin,cysteine-richrepeated	N	-99.32	-	No					-0.944475	0.00762277
23	AgB01_g024_t01	papilin	Unknown product	Unknown			M	52	0	1		2	0	ExpAA=0.69 First60=0.69 PredHel=0 Topology=o	52	0						CYT		6.294	9.1			0.761	2.775	0.006	cyt						AgB01_g024_t01-IPRSCAN			N	Too short sequence	-	No					-0.99684	0.00573105
24	AgB01_g025_t02	sentrin-specific_protease_7	sentrin-specific protease 7	Post-translational Modifications / protease	NR	0	F	658	0	3		12	0	ExpAA=0.06 First60=0.01 PredHel=0 Topology=o	658	0						CYT		73.915	9.35			0.344	0.633	0.001	nuc		PF02902	Ulp1 protease family, C-terminal catalytic domain	PTHR44655	1.6e-59	AgB01_g025_t02-IPRSCAN	IPR003653; IPR003653	Ulp1proteasefamily,C-terminalcatalyticdomain	N	-142.91	-	No					-0.929822	0.00825525
25	AgB01_g026_t05	Hemicentin-1,_partial	Thrombospondin type 1 repeats	Extracellular Matrix	SMART	6e-08	T	296	0	2		18	0	ExpAA=0.00 First60=0.00 PredHel=0 Topology=o	296	0						CYT		32.997	8.06			0.836	4.137	0.008	nuc	RSSRKQR|NT 0.548 *ProP*	PF00090; PF00090	Thrombospondin type 1 domain; Thrombospondin type 1 domain	PTHR13723	4.7e-35	AgB01_g026_t05-IPRSCAN	IPR000884; IPR036383; IPR036383	Thrombospondintype-1(TSP1)repeat; Thrombospondintype-1(TSP1)repeatsuperfamily	N	-185.41	-	No					-0.962368	0.00691531
26	AgB01_g027_t04	1-acyl-sn-glycerol-3-phosphate_acyltransferase_acl-12	transferase transferring acyl groups - transferase - CDP-diacylglycerol biosynthetic process - integral component of membrane - membrane - - probable fragment - 2 predicted membrane helices	Storage / membrane	GO	1e-64	M	267	0	0	W(3.02)	4	0	ExpAA=47.62 First60=21.42 PredHel=1 Topology=i43-65o	267	1	8.2	75.7	16.1		202	BL/ANC		30.534	9.2			0.979	3.749	0.007	end		PF01553	Acyltransferase	PTHR10983:SF14	3.5e-91	AgB01_g027_t04-IPRSCAN	IPR002123; IPR002123	Phospholipid/glycerolacyltransferase	N	-122.08	-	No					-0.964592	0.00683203
27	AgB01_g028_t09	Cell_death_abnormality_protein_1	Cell death abnormality protein 1 - establishment of protein localization - engulfment of apoptotic cell - defense response to bacterium - cellular - probable fragment	Signal Transduction / Apoptosis	GO	0	K	658	0	6	C(6.21)	97	0	ExpAA=22.06 First60=0.01 PredHel=1 Topology=o535-557i	658	1	3.3	81.3	15.3		101	CYT		71.521	5.13			0.17	0.351	0.001	nuc		PF00053; PF00053	Laminin EGF domain; Laminin EGF domain	PTHR24035	1.5e-127	AgB01_g028_t09-IPRSCAN	IPR000742; IPR013032; IPR002049; IPR000742	EGF-likedomain; EGF-like,conservedsite; LamininEGFdomain	N	-32.76	-	No					-0.944541	0.00762003
28	AgB01_g029_t01	Cell_death_abnormality_protein_1	Conserved secreted protein precursor	Secreted / Uncharacterized	CDD	6e-86	M	172	0	0	C(4.9)	20	0	ExpAA=0.44 First60=0.44 PredHel=0 Topology=o	172	0						SIG	23-24	19.023	7.76	16.236	5.91	0.834	4.191	0.008	mit		PF07546	EMI domain	PTHR24035	1.9e-32	AgB01_g029_t01-IPRSCAN	IPR013032; IPR011489; IPR011489	EGF-like,conservedsite; EMIdomain	N	Too short sequence	-	No					-0.981013	0.00624741
29	AgB01_g030_t02	hypothetical_protein	Unknown product	Unknown			M	681	0	1		17	0	ExpAA=0.02 First60=0.00 PredHel=0 Topology=o	681	0						CYT		78.13	8.45			0.345	0.639	0.001	cyt						AgB01_g030_t02-IPRSCAN			N	-142.81	-	No					-0.959898	0.00700895
30	AgB01_g031_t01	spry_domain-containing_protein_7	spry domain-containing protein 7 - probable fragment	Uncharacterized	NR	2e-90	M	178	0.561798	0	X(82.73)	7	0.561798	ExpAA=0.01 First60=0.00 PredHel=0 Topology=o	178	0						CYT		19.395	5.88			0.477	0.943	0.002	cyt		PF00622	SPRY domain	PTHR20951	5.4e-48	AgB01_g031_t01-IPRSCAN	IPR003877; IPR013320; IPR035766; IPR003877	SPRYdomain; ConcanavalinA-likelectin/glucanasedomainsuperfamily; SPRYdomain-containingprotein7	N	Too short sequence	-	No					-0.982674	0.00619112
31	AgB01_g032_t02	hypothetical_protein	hypothetical protein Tcan_06837	Uncharacterized	NR	0	M	602	0	0		8	0	ExpAA=0.04 First60=0.02 PredHel=0 Topology=o	602	0						CYT		67.278	8.46			0.393	0.73	0.001	cyt	SDTRSRR|DN 0.592 *ProP* ; VAHRKRR|AL 0.784 *ProP*	PF16686	ssDNA-binding domain of telomere protection protein	PTHR14513	3.6e-14	AgB01_g032_t02-IPRSCAN	IPR028389; IPR012340; IPR032042	Protectionoftelomeresprotein1; Nucleicacid-binding,OB-fold; Protectionoftelomeresprotein1,ssDNA-bindingdomain	N	-134.84	-	No					-0.911674	0.00911117
32	AgB01_g033_t02	hypothetical_protein	NEK family protein kinase Nek4 - activation of protein kinase - cytoplasm - regulation of apoptotic process - regulation of mitotic cell cycle - - probable fragment	Signal Transduction	GO	6e-32	R	196	0	0	N(8.3)	4	0	ExpAA=0.01 First60=0.01 PredHel=0 Topology=i	196	0						CYT		22.458	9.84			0.373	1.22	0.002	mit						AgB01_g033_t02-IPRSCAN			N	Too short sequence	-	No					-1.00506	0.00547981
33	AgB01_g034_t01	hypothetical_protein	Unknown product - 2 predicted membrane helices	Unknown / membrane			M	113	0	0	L(5.86)	1	0	ExpAA=44.73 First60=29.91 PredHel=2 Topology=i13-35o55-77i	113	2	38.9	17.7	43.4		36	BL/SIG		13.343	9.75			0.857	4.657	0.009	end						AgB01_g034_t01-IPRSCAN			N	Too short sequence	-	No					-0.892351	0.0101193
34	AgB01_g035_t02	oxysterol-binding_protein_1	Unknown product	Unknown			M	613	0	1		6	0	ExpAA=0.00 First60=0.00 PredHel=0 Topology=o	613	0						CYT		67.803	9.62			0.12	0.259	0.001	nuc		PF07707	BTB And C-terminal Kelch	PTHR22670	5.7e-15	AgB01_g035_t02-IPRSCAN	IPR011705	BTB/Kelch-associated	N	-95.22	-	No					-0.95768	0.0070941
35	AgB01_g036_t03	Oxysterol-binding_protein_1,_partial	Unknown product - GPI anchored	Unknown / GPI			M	114	0	0	W(3.14)	5	0	ExpAA=19.05 First60=0.01 PredHel=0 Topology=o	114	0						CYT		13.158	5.15			0.863	4.788	0.01	end		PF01237	Oxysterol-binding protein	PTHR10972	1.4e-31	AgB01_g036_t03-IPRSCAN	IPR000648; IPR037239; IPR000648	Oxysterol-bindingprotein; Oxysterol-bindingproteinsuperfamily	Y	Too short sequence	-	No					-0.903482	0.00952582
36	AgB01_g037_t01	Dedicator_of_cytokinesis_protein_11	PH domain-containing protein - probable fragment	Signal Transduction	KOG	0	M	1392	0	1		27	0	ExpAA=0.01 First60=0.00 PredHel=0 Topology=o	1392	0						CYT		153.605	6.17			0.332	0.614	0.001	nuc	ISIRKHR|SS 0.686 *ProP* ; VLNRVPR|DV 0.607 *ProP*	PF14429; PF06920	C2 domain in Dock180 and Zizimin proteins; Dock homology region 2	PTHR23317	3.6e-299	AgB01_g037_t01-IPRSCAN	IPR027007; IPR026791; IPR027357; IPR010703	DHR-1domain; Dedicatorofcytokinesis; DHR-2domain; Dedicatorofcytokinesis,C-terminal	N	-176.01	-	No					-0.958974	0.00704427
37	AgB01_g038_t01	Dedicator_of_cytokinesis_protein_11	Unknown product	Unknown			M	73	0	0		2	0	ExpAA=1.87 First60=0.70 PredHel=0 Topology=o	73	0						CYT		8.332	9.62			0.646	1.865	0.004	cyt				PTHR23317	3e-20	AgB01_g038_t01-IPRSCAN	IPR026791	Dedicatorofcytokinesis	N	Too short sequence	-	No					-1.01473	0.00519822
38	AgB01_g039_t02	Phosphatidylinositol_transfer_protein_beta_isoform	Phosphatidylinositol transfer protein - probable fragment	Lipid Metabolism	KOG	1e-33	M	147	0	2		3	0	ExpAA=0.00 First60=0.00 PredHel=0 Topology=o	147	0						CYT		17.625	8.71			0.485	0.999	0.002	cyt		PF02121	Phosphatidylinositol transfer protein	PTHR10658	9e-36	AgB01_g039_t02-IPRSCAN	IPR001666; IPR023393; IPR001666	Phosphatidylinositoltransferprotein; START-likedomainsuperfamily	N	Too short sequence	-	No					-0.944366	0.00762727
39	AgB01_g040_t01	hypothetical_protein	Unknown product	Unknown			M	39	0	0	I(4.04)	1	0	ExpAA=0.07 First60=0.07 PredHel=0 Topology=o	39	0						CYT		4.695	5.99						cyt						AgB01_g040_t01-IPRSCAN			N	Too short sequence	-	No					-0.90026	0.00969398
40	AgB01_g041_t03	Tau-tubulin_kinase_2	tau-tubulin kinase 1 - probable fragment	Cytoskeletal	NR	0	M	324	0	3		9	0	ExpAA=0.01 First60=0.00 PredHel=0 Topology=o	324	0						CYT		36.732	7.98			0.443	0.847	0.002	cyt		PF00069	Protein kinase domain	PTHR11909	2.3e-106	AgB01_g041_t03-IPRSCAN	IPR000719; IPR017441; IPR011009; IPR000719	Proteinkinasedomain; Proteinkinase,ATPbindingsite; Proteinkinase-likedomainsuperfamily	N	-180.9	-	No	38.5	4.5e-11	0.696404	CK1/WORM6 protein kinase	-0.988918	0.00598397
41	AgB01_g042_t01	hypothetical_protein	serine/threonine-protein kinase clkA - probable fragment	Signal Transduction	REFSEQ-INVERTEBRATE	7e-29	M	144	0	0	N(11.46)	0	0	ExpAA=0.00 First60=0.00 PredHel=0 Topology=o	144	0						CYT		16.474	8.34			0.812	4.32	0.009	mit						AgB01_g042_t01-IPRSCAN			N	Too short sequence	-	No					-1.04144	0.00449315
42	AgB01_g043_t01	hypothetical_protein	hypothetical secreted protein precursor	Secreted / Unknown			X	79	1.26582	0	T(4.98)X(186.4)	2	1.26582	ExpAA=17.90 First60=17.89 PredHel=0 Topology=o	79	0						SIG	21-22	7.928	8.86	6.076	8.84	0.875	5.186	0.01	mit						AgB01_g043_t01-IPRSCAN			N	Too short sequence	-	No					-0.98586	0.00608456
43	AgB01_g044_t01	hypothetical_protein	Unknown product	Unknown			M	93	0	0		3	0	ExpAA=0.00 First60=0.00 PredHel=0 Topology=o	93	0						CYT		10.685	10.15			0.676	1.911	0.004	mit						AgB01_g044_t01-IPRSCAN			N	Too short sequence	-	No					-0.709162	0.0271562
44	AgB01_g045_t09	Transporter,_partial	transporter C02C2.4 - signalP detected - 10 predicted membrane helices	Transporters / membrane	NR	0	M	505	0	1		17	0	ExpAA=238.90 First60=22.39 PredHel=10 Topology=i21-43o102-124i131-153o163-185i222-244o280-302i363-385o395-417i429-451o461-483i	505	10	43.6	24.8	31.7			SIG	31-32	55.731	8.05	52.14	6.49	0.835	4.08	0.008	end		PF07690	Major Facilitator Superfamily	PTHR11662:SF405	1.4e-148	AgB01_g045_t09-IPRSCAN	IPR036259; IPR011701; IPR020846; IPR020846	MFStransportersuperfamily; Majorfacilitatorsuperfamily; Majorfacilitatorsuperfamilydomain	N	-17.02	-	No					-0.923208	0.00855754
45	AgB01_g046_t02	Dolichyl-diphosphooligosaccharide--protein_glycosyltransferase_subunit_2	dolichyl-diphosphooligosaccharide--protein glycosyltransferase subunit 2 - signalP detected - 3 predicted membrane helices	Carbohydrate Metabolism / membrane	NR	0	M	641	0	1		3	0	ExpAA=73.63 First60=8.51 PredHel=3 Topology=o547-569i581-603o607-629i	641	3	10.3	86	3.7			SIG	19-20	70.318	9.06	68.121	9.02	0.531	1.158	0.002	end		PF05817	Oligosaccharyltransferase subunit Ribophorin II	PTHR12640	1.7e-188	AgB01_g046_t02-IPRSCAN	IPR008814; IPR008814	Dolichyl-diphosphooligosaccharide--proteinglycosyltransferasesubunitSwp1	N	-143.89	-	No					-0.924716	0.00848766
46	AgB01_g047_t02	Acyl-CoA_synthetase_family_member_3	acyl-CoA synthetase family member 3 mitochondrial - probable fragment	Lipid Metabolism	REFSEQ-INVERTEBRATE	3e-55	M	513	0	0		14	0	ExpAA=0.84 First60=0.00 PredHel=0 Topology=o	513	0						CYT		58.224	8.42			0.651	1.972	0.004	mit		PF00501; PF13193	AMP-binding enzyme; AMP-binding enzyme C-terminal domain	PTHR43201	2.5e-164	AgB01_g047_t02-IPRSCAN	IPR000873; IPR025110; IPR020845	AMP-dependentsynthetase/ligase; AMP-bindingenzyme,C-terminaldomain; AMP-binding,conservedsite	N	-128.86	-	No					-0.947921	0.00748116
47	AgB01_g048_t01	Yorkie	ciliary base - RNA polymerase II transcription factor complex - positive regulation of transcription by RNA polymerase II - cell projection - protein	Signal Transduction	GO	5e-29	M	473	0	8		6	0	ExpAA=0.00 First60=0.00 PredHel=0 Topology=o	473	0						CYT		53.464	6.41			0.553	1.207	0.002	nuc		PF00397	WW domain	PTHR17616	5e-30	AgB01_g048_t01-IPRSCAN	IPR001202; IPR036020; IPR001202	WWdomain; WWdomainsuperfamily	N	-156.58	-	No					-0.839909	0.0134455
48	AgB01_g049_t01	hypothetical_protein	Unknown product	Unknown			M	140	0	0		4	0	ExpAA=3.94 First60=0.00 PredHel=0 Topology=o	140	0						CYT		16.718	9.3			0.831	4.357	0.009	cyt						AgB01_g049_t01-IPRSCAN			N	Too short sequence	-	No					-0.95824	0.0070725
49	AgB01_g050_t03	Protein_FAM43A	Protein FAM43A	Uncharacterized	NR	0	M	430	0	1		12	0	ExpAA=0.01 First60=0.00 PredHel=0 Topology=o	430	0						CYT		47.744	4.95			0.226	0.435	0.001	nuc	LPFRKRR|QS 0.581 *ProP*	PF14719	Phosphotyrosine interaction domain (PTB/PID)	PTHR11232:SF2	2.7e-107	AgB01_g050_t03-IPRSCAN	IPR033930; IPR006020; IPR011993	FAM43A/B,phosphotyrosine-bindingdomain; PTB/PIdomain; PH-likedomainsuperfamily	N	-123.3	-	No					-0.899457	0.00973634
50	AgB01_g051_t01	Zinc_finger_HIT_domain-containing_protein_1	metal ion binding - histone exchange - histone deacetylase binding - nucleosome binding - regulation of histone deacetylation - Swr1 complex	Nuclear Regulation	GO	6e-44	M	180	0	1		7	0	ExpAA=0.14 First60=0.00 PredHel=0 Topology=o	180	0						CYT		20.912	9.68			0.762	1.017	0.002	nuc	RRRRLRK|QL 0.529 *ProP*	PF04438	HIT zinc finger	PTHR13093	5.4e-45	AgB01_g051_t01-IPRSCAN	IPR007529; IPR007529	Zincfinger,HIT-type	N	Too short sequence	-	No					-0.913516	0.00902045
51	AgB01_g052_t01	UBX_domain-containing_protein_7	ubiquitin binding - VCP-NPL4-UFD1 AAA ATPase complex - ubiquitin protein ligase binding - transcription factor binding -	Proteasome	GO	3e-50	M	494	0	2		7	0	ExpAA=0.01 First60=0.00 PredHel=0 Topology=o	494	0						CYT		55.775	5.36			0.379	1.357	0.003	nuc		PF14555; PF00789; PF13899	UBA-like domain; UBX domain; Thioredoxin-like	PTHR23322:SF6	4.7e-97	AgB01_g052_t01-IPRSCAN	IPR006577; IPR001012; IPR036249; IPR029071	UAS; UBXdomain; Thioredoxin-likesuperfamily; Ubiquitin-likedomainsuperfamily	N	-160.59	-	No					-0.997147	0.00572147
52	AgB01_g053_t01	beta-lactamase_domain-containing_protein_2	Unknown product	Unknown			M	149	0	1		1	0	ExpAA=0.14 First60=0.03 PredHel=0 Topology=o	149	0						CYT		17.176	9.68			0.6	0.96	0.002	cyt				PTHR43319	4.6e-22	AgB01_g053_t01-IPRSCAN	IPR012338	Beta-lactamase/transpeptidase-like	N	Too short sequence	-	No					-0.904966	0.00944936
53	AgB01_g054_t01	degenerin_del-1	Unknown product	Unknown			M	182	0	1		7	0	ExpAA=4.48 First60=4.47 PredHel=0 Topology=i	182	0						CYT		21.3	9.53			0.379	0.722	0.001	mit		PF00858	Amiloride-sensitive sodium channel	PTHR11690:SF185	5.2e-26	AgB01_g054_t01-IPRSCAN	IPR001873; IPR001873	Epithelialsodiumchannel	N	Too short sequence	-	No					-1.01238	0.00526552
54	AgB01_g055_t01	BTB/POZ_domain-containing_protein_KCTD16	BTB/POZ domain	Transporters	PFAM	2e-12	M	183	0	1		0	0	ExpAA=0.05 First60=0.04 PredHel=0 Topology=o	183	0						CYT		20.971	6.1			0.591	1.372	0.003	cyt		PF02214	BTB/POZ domain	PTHR14499	4.7e-38	AgB01_g055_t01-IPRSCAN	IPR011333; IPR003131	SKP1/BTB/POZdomainsuperfamily; Potassiumchanneltetramerisation-typeBTBdomain	N	Too short sequence	-	No					-0.961842	0.00693513
55	AgB01_g056_t03	hypothetical_protein	Unknown product	Unknown			E	80	0	0	L(6.62)	0	0	ExpAA=32.32 First60=25.21 PredHel=1 Topology=o38-60i	80	1	27.5	47.5	25		20	BL/SIG		9.344	11.9			0.366	1.071	0.002	end						AgB01_g056_t03-IPRSCAN			N	Too short sequence	-	No					-0.839961	0.0134417
56	AgB01_g057_t07	hypothetical_protein	NEK family protein kinase Nek4 - activation of protein kinase - cytoplasm - regulation of apoptotic process - regulation of mitotic cell cycle - - probable fragment	Signal Transduction	GO	1e-32	M	136	0	0	N(11.97)	0	0	ExpAA=0.00 First60=0.00 PredHel=0 Topology=o	136	0						CYT		15.637	8.34			0.802	4.176	0.008	mit						AgB01_g057_t07-IPRSCAN			N	Too short sequence	-	No					-1.03806	0.00457704
57	AgB01_g058_t01	hypothetical_protein	Unknown product - GPI anchored	Unknown / GPI			M	53	0	0	C(3.97)Y(3.19)	5	0	ExpAA=0.07 First60=0.07 PredHel=0 Topology=o	53	0						CYT		6.118	8.35			0.442	0.948	0.002	nuc						AgB01_g058_t01-IPRSCAN			Y	Too short sequence	-	No					-0.747431	0.0221294
58	AgB01_g059_t01	hypothetical_protein	Unknown product - 3 predicted membrane helices	Unknown / membrane			M	217	0	0	W(3.3)	4	0	ExpAA=71.19 First60=3.77 PredHel=3 Topology=o96-118i131-153o176-198i	217	3	30.4	54.8	14.7			CYT		24.821	6.27			0.316	0.681	0.001	end						AgB01_g059_t01-IPRSCAN			N	-128.87	-	No					-0.919662	0.00872411
59	AgB01_g060_t01	ligand-gated_ion_channel_50	Ligand-gated ion channel 50 - probable fragment - signalP detected - 3 predicted membrane helices - GPI anchored	Transporters / membrane / GPI	NR	0	M	352	0	2		9	0	ExpAA=60.51 First60=22.21 PredHel=3 Topology=o10-32i279-301o311-329i	352	3	17.6	5.7	76.7			SIG	29-30	40.887	6.81	37.64	6.38	0.468	1.007	0.002	mit		PF02931; PF02932	Neurotransmitter-gated ion-channel ligand binding domain; Neurotransmitter-gated ion-channel transmembrane region	PTHR18945:SF444	1.6e-124	AgB01_g060_t01-IPRSCAN	IPR006201; IPR006202; IPR036734; IPR006029; IPR006028; IPR036719; IPR018000; IPR036734	Neurotransmitter-gatedion-channel; Neurotransmitter-gatedion-channelligand-bindingdomain; Neurotransmitter-gatedion-channelligand-bindingdomainsuperfamily; Neurotransmitter-gatedion-channeltransmembranedomain; Gamma-aminobutyricacidAreceptor/Glycinereceptoralpha; Neurotransmitter-gatedion-channeltransmembranedomainsuperfamily; Neurotransmitter-gatedion-channel,conservedsite	Y	-119.45	-	No					-0.970579	0.00661285
60	AgB01_g061_t10	Prolactin_regulatory_element-binding_protein	Prolactin regulatory element-binding protein - probable fragment	Cytoskeletal	NR	0	M	451	0	1		9	0	ExpAA=27.54 First60=0.10 PredHel=1 Topology=o419-441i	451	1	4.9	92.9	2.2		10	CYT		49.977	8.9			0.415	0.781	0.002	nuc	KVVRFDR|SI 0.610 *ProP*	PF00400; PF00400	WD domain, G-beta repeat; WD domain, G-beta repeat	PTHR23284:SF0	6.3e-71	AgB01_g061_t10-IPRSCAN	IPR001680; IPR015943; IPR017986; IPR036322; IPR019775	WD40repeat; WD40/YVTNrepeat-like-containingdomainsuperfamily; WD40-repeat-containingdomain; WD40-repeat-containingdomainsuperfamily; WD40repeat,conservedsite	N	-101.82	-	No					-0.953012	0.00727669
61	AgB01_g062_t01	Prolactin_regulatory_element-binding_protein	Prolactin regulatory element-binding protein - probable fragment	Uncharacterized	NR	5e-55	M	157	0.636943	1	X(93.8)	5	0.636943	ExpAA=1.13 First60=1.05 PredHel=0 Topology=o	157	0						CYT		16.651	6.99			0.492	1.004	0.002	cyt				PTHR23284:SF0	3.5e-15	AgB01_g062_t01-IPRSCAN	IPR015943	WD40/YVTNrepeat-like-containingdomainsuperfamily	N	Too short sequence	-	No					-0.981389	0.00623462
62	AgB01_g063_t01	Ankyrin_repeat_domain-containing_protein_49	Fetal globin-inducing factor (contains ankyrin repeats)	Transcription Machinery	KOG	2e-42	M	185	0	2		3	0	ExpAA=2.84 First60=0.00 PredHel=0 Topology=o	185	0						CYT		20.636	4.9			0.464	0.926	0.002	cyt		PF12796	Ankyrin repeats (3 copies)	PTHR24126	2e-29	AgB01_g063_t01-IPRSCAN	IPR020683; IPR002110; IPR036770; IPR002110	Ankyrinrepeat-containingdomain; Ankyrinrepeat; Ankyrinrepeat-containingdomainsuperfamily	N	Too short sequence	-	No					-0.983181	0.00617405
63	AgB01_g064_t01	ZDHHC-type_palmitoyltransferase_2	zdhhc-type palmitoyltransferase 2 - signalP detected - 6 predicted membrane helices	Lipid Metabolism / membrane	NR	0	M	293	0	1		15	0	ExpAA=112.64 First60=37.50 PredHel=5 Topology=i12-34o44-66i140-162o172-189i202-224o	293	5	35.8	30.4	33.8			SIG	41-42	34.037	8.78	29.483	8.66	0.763	2.666	0.005	end		PF01529	DHHC palmitoyltransferase	PTHR22883	3.8e-69	AgB01_g064_t01-IPRSCAN	IPR001594	Palmitoyltransferase,DHHCdomain	N	-48.29	-	No					-0.959115	0.00703886
64	AgB01_g065_t02	85_kDa_calcium-independent_phospholipase_A2	85 kda calcium-independent phospholipase a2 - probable fragment	Lipid Metabolism	NR	0	M	416	0	2		11	0	ExpAA=0.73 First60=0.31 PredHel=0 Topology=o	416	0						CYT		46.098	8.24			0.655	1.76	0.004	mit		PF12796; PF01734	Ankyrin repeats (3 copies); Patatin-like phospholipase	PTHR24139:SF34	4.8e-81	AgB01_g065_t02-IPRSCAN	IPR020683; IPR036770; IPR002110; IPR002641; IPR016035	Ankyrinrepeat-containingdomain; Ankyrinrepeat-containingdomainsuperfamily; Ankyrinrepeat; Patatin-likephospholipasedomain; Acyltransferase/acylhydrolase/lysophospholipase	N	-143.27	-	No					-0.858594	0.012152
65	AgB01_g066_t01	Protein_FAM114A2	85/88 kDa calcium-independent phospholipase A2 - probable fragment	Lipid Metabolism	NR	0	M	459	0	1		6	0	ExpAA=0.20 First60=0.00 PredHel=0 Topology=o	459	0						CYT		51.069	4.73			0.741	2.543	0.005	nuc		PF05334	Protein of unknown function (DUF719)	PTHR12842	3.6e-60	AgB01_g066_t01-IPRSCAN	IPR007998; IPR007998	ProteinofunknownfunctionDUF719	N	-141.1	-	No					-0.991726	0.00589309
66	AgB01_g067_t01	carrier_triple_repeat_protein_1	Solute carrier family 25 member 51	Transporters	NR	0	F	322	0	1		5	0	ExpAA=21.49 First60=0.28 PredHel=1 Topology=o230-252i	322	1	6.8	71.4	21.7		70	CYT		37.179	10.88			0.094	0.207	0	nuc		PF00153; PF00153; PF00153	Mitochondrial carrier protein; Mitochondrial carrier protein; Mitochondrial carrier protein	PTHR24089:SF129	6.9e-87	AgB01_g067_t01-IPRSCAN	IPR018108; IPR023395; IPR023395	Mitochondrialsubstrate/solutecarrier; Mitochondrialcarrierdomainsuperfamily	N	-93.52	-	No					-0.955936	0.00716178
67	AgB01_g068_t05	hypothetical_protein	Unknown product	Unknown			M	80	0	0		2	0	ExpAA=3.08 First60=3.08 PredHel=0 Topology=o	80	0						CYT		9.207	9.47			0.902	5.818	0.012	cyt	ISVRDKR|GK 0.575 *ProP*					AgB01_g068_t05-IPRSCAN			N	Too short sequence	-	No					-1.02143	0.00501184
68	AgB01_g069_t01	hypothetical_protein	Unknown product	Unknown			G	44	0	0	F(5.38)	2	0	ExpAA=19.71 First60=19.71 PredHel=1 Topology=o15-34i	44	1	43.2	34.1	22.7		10	ANC		5.515	6.74	0.732	8.59	0.311	0.624	0.001	mit						AgB01_g069_t01-IPRSCAN			N	Too short sequence	-	No					-1.01011	0.00533104
69	AgB01_g070_t01	spermatogenesis-associated_protein_13	Unknown product	Unknown			M	70	0	0		4	0	ExpAA=0.00 First60=0.00 PredHel=0 Topology=o	70	0						CYT		8.476	8.36			0.833	4.277	0.009	nuc						AgB01_g070_t01-IPRSCAN			N	Too short sequence	-	No					-0.99824	0.00568747
70	AgB01_g071_t01	acetylcholine_receptor_subunit_alpha-type_deg-3	Acetylcholine receptor subunit alpha-type deg-3 - 5 predicted membrane helices	Signal Transduction / membrane	NR	0	M	339	0	1		4	0	ExpAA=88.21 First60=0.00 PredHel=4 Topology=o138-160i173-192o207-229i309-331o	339	4	25.1	47.5	27.4			CYT		38.863	5.94			0.262	0.495	0.001	end		PF02931; PF02932	Neurotransmitter-gated ion-channel ligand binding domain; Neurotransmitter-gated ion-channel transmembrane region	PTHR18945:SF529	4e-95	AgB01_g071_t01-IPRSCAN	IPR006202; IPR036719; IPR006029; IPR036734; IPR006201; IPR018000; IPR036734	Neurotransmitter-gatedion-channelligand-bindingdomain; Neurotransmitter-gatedion-channeltransmembranedomainsuperfamily; Neurotransmitter-gatedion-channeltransmembranedomain; Neurotransmitter-gatedion-channelligand-bindingdomainsuperfamily; Neurotransmitter-gatedion-channel; Neurotransmitter-gatedion-channel,conservedsite	N	-113.32	-	No					-0.943241	0.00767414
71	AgB01_g072_t03	hypothetical_protein	Unknown product	Unknown			G	192	0	1		2	0	ExpAA=0.01 First60=0.00 PredHel=0 Topology=o	192	0						CYT		21.63	5.86			0.828	3.864	0.008	nuc						AgB01_g072_t03-IPRSCAN			N	Too short sequence	-	No					-0.947652	0.00749211
72	AgB01_g073_t02	Propionyl-CoA_carboxylase_alpha_chain	Propionyl-CoA carboxylase alpha chain mitochondrial	Energy Metabolism	NR	0	V	604	0	4		9	0	ExpAA=0.02 First60=0.00 PredHel=0 Topology=o	604	0						CYT		67.543	7.95			0.381	0.723	0.001	cyt		PF00289; PF00364; PF02785; PF02786	Biotin carboxylase, N-terminal domain; Biotin-requiring enzyme; Biotin carboxylase C-terminal domain; Carbamoyl-phosphate synthase L chain, ATP binding domain	PTHR18866	2e-284	AgB01_g073_t02-IPRSCAN	IPR013815; IPR005481; IPR011761; IPR011053; IPR011764; IPR000089; IPR005479; IPR005482; IPR001882; IPR011054; IPR000089	ATP-graspfold,subdomain1; Biotincarboxylase-like,N-terminaldomain; ATP-graspfold; Singlehybridmotif; Biotincarboxylationdomain; Biotin/lipoylattachment; Carbamoyl-phosphatesynthetaselargesubunit-like,ATP-bindingdomain; Biotincarboxylase,C-terminal; Biotin-bindingsite; Rudimentsinglehybridmotif	N	-214.21	-	No					-0.937097	0.00793499
73	AgB01_g074_t01	Propionyl-CoA_carboxylase_alpha_chain	Biotin carboxylase - probable fragment	Internal Metabolism	PFAM	2e-19	M	72	1.38889	0	X(204.53)	1	1.38889	ExpAA=0.00 First60=0.00 PredHel=0 Topology=o	72	0						CYT		7.756	5.8			0.759	0.959	0.002	cyt		PF00289	Biotin carboxylase, N-terminal domain	PTHR18866:SF104	8.6e-26	AgB01_g074_t01-IPRSCAN	IPR005481; IPR011764; IPR016185	Biotincarboxylase-like,N-terminaldomain; Biotincarboxylationdomain; Pre-ATP-graspdomainsuperfamily	N	Too short sequence	-	No					-0.972179	0.00655546
74	AgB01_g075_t05	Propionyl-CoA_carboxylase_alpha_chain	Unknown product	Unknown			M	75	0	2		1	0	ExpAA=0.00 First60=0.00 PredHel=0 Topology=o	75	0						CYT		8.28	8.93			0.731	2.483	0.005	cyt						AgB01_g075_t05-IPRSCAN			N	Too short sequence	-	No					-0.885665	0.0104932
75	AgB01_g076_t01	hypothetical_protein	Unknown product	Unknown			V	109	0	0		5	0	ExpAA=4.37 First60=4.28 PredHel=0 Topology=o	109	0						CYT		12.086	7.79			0.782	2.027	0.004	cyt						AgB01_g076_t01-IPRSCAN			N	Too short sequence	-	No					-0.866455	0.0116453
76	AgB01_g077_t02	hypothetical_protein	Unknown product	Unknown			V	55	0	1		2	0	ExpAA=0.00 First60=0.00 PredHel=0 Topology=o	55	0						CYT		5.893	5.53			0.791	3.647	0.007	mit						AgB01_g077_t02-IPRSCAN			N	Too short sequence	-	No					-0.925363	0.00845787
77	AgB01_g078_t02	G-protein_coupled_receptor	G-protein coupled receptor F59B2.13 - probable fragment - 3 predicted membrane helices - GPI anchored	Signal Transduction / membrane / GPI	NR	9e-80	N	258	0	0		4	0	ExpAA=68.39 First60=23.05 PredHel=3 Topology=o27-49i120-142o157-179i	258	3	25.6	16.3	58.1			CYT		29.25	10.13			0.158	0.323	0.001	end	ISRRSKK|WS 0.631 *ProP*			PTHR22751:SF43	1.4e-33	AgB01_g078_t02-IPRSCAN	IPR017452	GPCR,rhodopsin-like,7TM	Y	-60.32	-	No					-0.934348	0.00805454
78	AgB01_g079_t01	Putative_G-protein_coupled_receptor_F59B2.13	G-protein coupled receptor F59B2.13 - probable fragment - signalP detected - 5 predicted membrane helices	Signal Transduction / membrane	NR	1e-77	F	187	0	0		6	0	ExpAA=87.94 First60=33.79 PredHel=4 Topology=o20-42i49-71o108-130i151-173o	187	4	47.1	38	15			SIG	28-29	21.224	8.99	18.043	9.69	0.829	4.254	0.009	end		PF10324	Serpentine type 7TM GPCR chemoreceptor Srw	PTHR22751	1.3e-35	AgB01_g079_t01-IPRSCAN	IPR019427; IPR000276; IPR017452	7TMGPCR,serpentinereceptorclassw(Srw); Gprotein-coupledreceptor,rhodopsin-like; GPCR,rhodopsin-like,7TM	N	Too short sequence	-	No					-0.990798	0.00592297
79	AgB01_g080_t01	hypothetical_protein	Unknown product	Unknown			M	103	0	0		1	0	ExpAA=1.96 First60=0.23 PredHel=0 Topology=o	103	0						CYT		12.272	5.02			0.875	5.001	0.01	end						AgB01_g080_t01-IPRSCAN			N	Too short sequence	-	No					-0.875812	0.0110693
80	AgB01_g081_t01	Uncharacterized_protein_tag-51	Unknown product	Unknown			M	517	0	1		12	0	ExpAA=16.84 First60=5.91 PredHel=0 Topology=o	517	0						CYT		59.017	5.91			0.465	0.94	0.002	cyt		PF14929	TAF RNA Polymerase I subunit A	PTHR32122	2.2e-16	AgB01_g081_t01-IPRSCAN			N	-135.77	-	No					-0.976133	0.00641576
81	AgB01_g082_t01	hypothetical_protein	Unknown product - 2 predicted membrane helices	Unknown / membrane			M	153	0	2		1	0	ExpAA=36.11 First60=24.38 PredHel=2 Topology=i7-29o49-71i	153	2	28.8	13.1	58.2		82	CYT		17.509	5.58			0.147	0.303	0.001	nuc						AgB01_g082_t01-IPRSCAN			N	Too short sequence	-	No					-0.862265	0.0119127
82	AgB01_g083_t02	hypothetical_protein	tRNA intron endonuclease family protein - probable fragment	Protein Synthesis	NR	2e-29	M	129	0	0		3	0	ExpAA=0.03 First60=0.00 PredHel=0 Topology=i	129	0						CYT		15.08	5.61			0.519	1.218	0.002	nuc		PF01974	tRNA intron endonuclease, catalytic C-terminal domain	PTHR13070	1.8e-13	AgB01_g083_t02-IPRSCAN	IPR011856; IPR006677; IPR036167	tRNAendonuclease-likedomainsuperfamily; tRNAintronendonuclease,catalyticdomain-like; tRNAintronendonuclease,catalyticdomain-likesuperfamily	N	Too short sequence	-	No					-0.961138	0.00696176
83	AgB01_g084_t01	U6_snRNA-associated_Sm-like_protein_LSm2	snRNP core protein	Transcription Machinery	KOG	3e-44	M	95	0	0		2	0	ExpAA=0.00 First60=0.00 PredHel=0 Topology=o	95	0						CYT		10.904	7.78			0.74	2.672	0.005	cyt		PF01423	LSM domain	PTHR13829	5.1e-74	AgB01_g084_t01-IPRSCAN	IPR016654; IPR001163; IPR010920	U6snRNA-associatedSm-likeproteinLSm2; LSMdomain,eukaryotic/archaea-type; LSMdomainsuperfamily	N	Too short sequence	-	No					-0.874066	0.0111746
84	AgB01_g085_t01	hypothetical_protein	Unknown product	Unknown			T	210	0	0		7	0	ExpAA=10.08 First60=0.01 PredHel=0 Topology=o	210	0						CYT		23.38	9.65			0.662	2.09	0.004	nuc						AgB01_g085_t01-IPRSCAN			N	-149.89	-	No					-0.901085	0.00965061
85	AgB01_g086_t02	hypothetical_protein	membrane protein (function unknown) - signalP detected - 4 predicted membrane helices	Uncharacterized / membrane	CDD	0	M	251	0	0	W(3.93)	6	0	ExpAA=120.13 First60=28.52 PredHel=4 Topology=i48-70o80-99i112-134o149-168i	251	4	32.7	10	57.4			SIG	34-35	28.482	8.72	24.843	8.59	0.391	0.923	0.002	end						AgB01_g086_t02-IPRSCAN			N	-31.33	-	No					-0.916229	0.00888843
86	AgB01_g087_t03	Glycogenin-1	transferase transferring glycosyl groups - transferase	Storage	GO	0	M	301	0	0		5	0	ExpAA=6.26 First60=2.89 PredHel=0 Topology=o	301	0						CYT		33.684	5.22			0.603	1.386	0.003	cyt		PF01501	Glycosyl transferase family 8	PTHR11183	5.3e-126	AgB01_g087_t03-IPRSCAN	IPR002495; IPR029044; IPR029044	Glycosyltransferase,family8; Nucleotide-diphospho-sugartransferases	N	-114.48	-	No					-1.00728	0.00541382
87	AgB01_g088_t01	hypothetical_protein	Unknown product	Unknown			K	126	0	0		4	0	ExpAA=0.00 First60=0.00 PredHel=0 Topology=o	126	0						CYT		13.97	10.04			0.698	2.133	0.004	nuc	HPARICR|SN 0.555 *ProP*					AgB01_g088_t01-IPRSCAN			N	Too short sequence	-	No					-1.00579	0.00545805
88	AgB01_g089_t02	G-protein_coupled_receptor,_partial	integral component of membrane - membrane - G-protein coupled receptor signaling pathway - signal transduction - plasma membrane - G-protein coupled - probable fragment - 3 predicted membrane helices	Signal Transduction / membrane	GO	5e-26	M	160	0	0		5	0	ExpAA=48.24 First60=19.21 PredHel=2 Topology=o43-65i78-100o	160	2	27.5	64.4	8.1			BL/ANC		18.127	9.36			0.783	3.55	0.007	end		PF00001	7 transmembrane receptor (rhodopsin family)	PTHR24229	1.9e-32	AgB01_g089_t02-IPRSCAN	IPR000276; IPR017452	Gprotein-coupledreceptor,rhodopsin-like; GPCR,rhodopsin-like,7TM	N	Too short sequence	-	No					-0.903705	0.0095143
89	AgB01_g090_t01	putative_g-protein_coupled_receptor	G-protein coupled receptor C06G4.5 - Membrane anchor detected - 3 predicted membrane helices	Signal Transduction / membrAnchor / membrane	NR	1e-62	L	192	0	0		3	0	ExpAA=68.16 First60=23.42 PredHel=3 Topology=o31-53i74-96o116-138i	192	3	34.4	26.6	39.1			ANC		22.125	9.89	17.312	9.86	0.462	1.077	0.002	end		PF00001	7 transmembrane receptor (rhodopsin family)	PTHR24229:SF53	7.3e-32	AgB01_g090_t01-IPRSCAN	IPR000276; IPR017452	Gprotein-coupledreceptor,rhodopsin-like; GPCR,rhodopsin-like,7TM	N	Too short sequence	-	No					-0.993489	0.00583671
90	AgB01_g091_t02	fog-3	fog-3 - probable fragment	Uncharacterized	NR	4e-43	M	110	0	0		2	0	ExpAA=1.83 First60=0.15 PredHel=0 Topology=o	110	0						CYT		12.583	9.62			0.716	2.66	0.005	nuc		PF07742	BTG family			AgB01_g091_t02-IPRSCAN	IPR036054; IPR002087	BTG-likedomainsuperfamily; Anti-proliferativeprotein	N	Too short sequence	-	No					-0.887816	0.0103715
91	AgB01_g092_t02	hypothetical_protein	Unknown product	Unknown			M	130	0	1		6	0	ExpAA=0.05 First60=0.00 PredHel=0 Topology=o	130	0						CYT		14.648	9.58			0.651	1.776	0.004	nuc						AgB01_g092_t02-IPRSCAN			N	Too short sequence	-	No					-0.916541	0.00887335
92	AgB01_g093_t03	ubiquinone_biosynthesis_protein_coq	Ubiquinone biosynthesis protein coq-4 mitochondrial - probable fragment	Energy Metabolism	NR	3e-73	M	170	0	1		0	0	ExpAA=10.21 First60=0.56 PredHel=0 Topology=o	170	0						CYT		19.657	8.05			0.522	1.119	0.002	nuc	IRRRMER|DV 0.731 *ProP*	PF05019	Coenzyme Q (ubiquinone) biosynthesis protein Coq4	PTHR12922:SF7	3.2e-62	AgB01_g093_t03-IPRSCAN	IPR027540; IPR007715; IPR007715	UbiquinonebiosynthesisproteinCoq4,eukaryotes; UbiquinonebiosynthesisproteinCoq4	N	Too short sequence	-	No					-0.863407	0.0118392
93	AgB01_g094_t01	dna_polymerase_epsilon_subunit_3	dna polymerase epsilon subunit 3	Nuclear Regulation	NR	6e-94	M	182	0	0		4	0	ExpAA=0.05 First60=0.05 PredHel=0 Topology=o	182	0						CYT		19.878	4.85			0.762	2.614	0.005	nuc		PF00808	Histone-like transcription factor (CBF/NF-Y) and archaeal histone	PTHR11064	2e-35	AgB01_g094_t01-IPRSCAN	IPR009072; IPR003958	Histone-fold; TranscriptionfactorCBF/NF-Y/archaealhistonedomain	N	Too short sequence	-	No					-0.914339	0.00898017
94	AgB01_g095_t03	Translation_initiation_factor_eIF-2B_subunit_delta	Translation initiation factor eIF-2B subunit delta - probable fragment	Protein Synthesis	NR	0	F	359	0	0		4	0	ExpAA=0.08 First60=0.00 PredHel=0 Topology=o	359	0						CYT		39.683	8.93			0.431	0.825	0.002	nuc				PTHR10233	4.4e-27	AgB01_g095_t03-IPRSCAN	IPR037171	NagB/RpiAtransferase-like	N	-179.24	-	No					-0.817448	0.0151811
95	AgB01_g096_t04	Neuropeptide_FF_receptor_2	prolactin-releasing peptide receptor - 7 predicted membrane helices	Cytoskeletal / membrane	NR	0	M	397	0	0		19	0	ExpAA=157.10 First60=23.81 PredHel=7 Topology=o29-51i64-86o101-123i143-162o193-215i255-272o292-314i	397	7	36.8	23.9	39.3			CYT		44.452	8.76			0.243	0.48	0.001	end		PF00001	7 transmembrane receptor (rhodopsin family)	PTHR24243:SF199	1.2e-154	AgB01_g096_t04-IPRSCAN	IPR000276; IPR017452; IPR000611; IPR000611	Gprotein-coupledreceptor,rhodopsin-like; GPCR,rhodopsin-like,7TM; NeuropeptideYreceptorfamily	N	66.94	74.99	GPCR					-0.927796	0.0083467
96	AgB01_g097_t01	wd_repeat-containing_protein_47	WD40 domain - probable fragment	Signal Transduction	CDD	4e-11	M	267	0	1		9	0	ExpAA=0.86 First60=0.00 PredHel=0 Topology=o	267	0						CYT		29.526	5.98			0.475	0.923	0.002	cyt		PF00400; PF00400	WD domain, G-beta repeat; WD domain, G-beta repeat	PTHR19863	2e-33	AgB01_g097_t01-IPRSCAN	IPR001680; IPR017986; IPR036322; IPR015943	WD40repeat; WD40-repeat-containingdomain; WD40-repeat-containingdomainsuperfamily; WD40/YVTNrepeat-like-containingdomainsuperfamily	N	-139.56	-	No					-0.99937	0.00565253
97	AgB01_g098_t01	hypothetical_protein	hypothetical protein asu_02733 - probable fragment	Uncharacterized	NR	3e-94	M	171	0	0		4	0	ExpAA=0.00 First60=0.00 PredHel=0 Topology=o	171	0						CYT		19.608	5.53			0.887	2.604	0.005	nuc	TLSRQSR|VV 0.594 *ProP*					AgB01_g098_t01-IPRSCAN	IPR035940; IPR035940	CAPsuperfamily	N	Too short sequence	-	No					-1.01247	0.00526273
98	AgB01_g099_t01	letm1_and_ef-hand_domain-containing_protein	LETM1-like protein - 2 predicted membrane helices	Energy Metabolism / membrane	CDD	0	M	793	0	3		5	0	ExpAA=21.97 First60=0.10 PredHel=1 Topology=i145-167o	793	1	2.8	78.9	18.3		626	CYT		90.09	6.69			0.468	0.698	0.001	mit	CRARGMR|SL 0.726 *ProP*	PF07766	LETM1-like protein	PTHR14009	7.8e-258	AgB01_g099_t01-IPRSCAN	IPR011685; IPR033122	LETM1-like; Letm1ribosome-bindingdomain	N	-213.7	-	No					-0.957146	0.00711473
99	AgB01_g100_t08	Suppressor_APC_domain-containing_protein_2	hypothetical protein ASU_02735 - probable fragment	Uncharacterized	NR	5e-35	M	101	0	0		2	0	ExpAA=0.00 First60=0.00 PredHel=0 Topology=o	101	0						CYT		11.848	6.26			0.88	5.127	0.01	nuc				PTHR14907:SF3	1e-19	AgB01_g100_t08-IPRSCAN	IPR026828; IPR002048; IPR011992	SuppressorAPCdomain-containingprotein1/2; EF-handdomain; EF-handdomainpair	N	Too short sequence	-	No					-1.00351	0.00552625
100	AgB01_g101_t01	cre-nlp-2_protein	hypothetical secreted protein precursor	Secreted / Unknown			M	185	0	1		2	0	ExpAA=0.20 First60=0.20 PredHel=0 Topology=o	185	0						SIG	20-21	20.714	10.1	18.645	10.05	0.907	6.005	0.012	exc	EERRAKR|SI 0.822 *ProP*					AgB01_g101_t01-IPRSCAN			N	Too short sequence	-	No					-0.94313	0.00767877
101	AgB01_g102_t01	Metal_tolerance_protein_7	Mitochondrial Fe2+ transporter MMT1 - 6 predicted membrane helices	Transporters / membrane	KOG	3e-83	M	345	0	2		6	0	ExpAA=128.44 First60=0.00 PredHel=6 Topology=i64-86o91-113i134-156o166-188i208-227o231-248i	345	6	35.9	5.5	58.6			CYT		39.63	8.16			0.246	0.134	0	end		PF16916; PF01545	Dimerisation domain of Zinc Transporter; Cation efflux family	PTHR43840:SF8	9.5e-121	AgB01_g102_t01-IPRSCAN	IPR027469; IPR036837; IPR002524; IPR027470; IPR002524	Cationeffluxtransmembranedomainsuperfamily; Cationeffluxprotein,cytoplasmicdomainsuperfamily; Cationeffluxprotein; Cationeffluxprotein,cytoplasmicdomain	N	-69.97	-	No					-0.962608	0.00690625
102	AgB01_g103_t01	FMRFamide-like_neuropeptides	FMRFamide-like neuropeptides - signalP detected	Secreted / hormone	SWISSP	4e-87	M	161	0	0		1	0	ExpAA=10.75 First60=10.75 PredHel=0 Topology=o	161	0						SIG	21-22	17.763	9.75	15.588	9.98	0.911	2.171	0.004	gol				PTHR20986:SF10	7.5e-21	AgB01_g103_t01-IPRSCAN			N	Too short sequence	-	No					-0.989564	0.00596295
103	AgB01_g104_t02	RecName:_Full=FMRFamide-like_neuropeptides;_Contains:_RecName:_Full=Neuropeptide_AF10;_AltName:_Full=GFGDEMSMPGVLRF-amide;_Contains:_RecName:_Full=Neuropeptide_AF20;_AltName:_Full=GMPGVLRF-amide;_Contains:_RecName:_Full=Neuropeptide_AF3;_AltName:_Full=AVPGVLRF-amide;_Contains:_RecName:_Full=Neuropeptide_AF4;_AltName:_Full=GDVPGVLRF-amide;_Contains:_RecName:_Full=Neuropeptide_AF13;_AltName:_Full=S…	Unknown product	Unknown			S	53	0	0	F(3.57)	1	0	ExpAA=23.21 First60=23.21 PredHel=1 Topology=o10-32i	53	1	41.5	18.9	39.6		21	BL	34-35	6.193	10.76	2.47	10.76	0.849	4.356	0.009	mit						AgB01_g104_t02-IPRSCAN			N	Too short sequence	-	No					-1.08871	0.00347075
104	AgB01_g105_t01	Poly(U)-specific_endoribonuclease	endoribonuclease - RNA phosphodiester bond hydrolysis - GPI anchored	Nuclear Metabolism / GPI	GO	0	L	601	0	2		11	0	ExpAA=16.13 First60=14.31 PredHel=1 Topology=i21-43o	601	1	3.7	92.8	3.5		558	BL	48-49	68.015	4.99	62.717	4.75	0.695	3.646	0.007	exc		PF09412; PF09412	Endoribonuclease XendoU; Endoribonuclease XendoU			AgB01_g105_t01-IPRSCAN	IPR018998; IPR037227; IPR037227	EndoUribonucleasefamily; EndoribonucleaseEndoU-like	Y	-131.06	-	No					-0.949399	0.00742122
105	AgB01_g106_t03	Zinc_finger_protein_ZIC_3	C2H2-type Zn-finger protein - probable fragment	Transcription Machinery	KOG	2e-16	M	267	0	0	H(3.3)	10	0	ExpAA=0.00 First60=0.00 PredHel=0 Topology=o	267	0						CYT		30.243	9.08			0.404	0.769	0.002	nuc		PF00096; PF00096	Zinc finger, C2H2 type; Zinc finger, C2H2 type	PTHR19818:SF69	1.2e-80	AgB01_g106_t03-IPRSCAN	IPR036236; IPR013087; IPR036236	ZincfingerC2H2superfamily; ZincfingerC2H2-type	N	-170.47	-	No					-1.05974	0.00406594
106	AgB01_g107_t02	hypothetical_protein	Unknown product	Unknown			M	461	0	1		8	0	ExpAA=0.01 First60=0.00 PredHel=0 Topology=o	461	0						CYT		51.937	4.65			0.711	2.154	0.004	nuc						AgB01_g107_t02-IPRSCAN			N	-139.38	-	No					-0.895092	0.00996981
107	AgB01_g108_t02	Serine/threonine-protein_kinase_Nek7	Mitogen-activated protein kinase kinase kinase 4 - probable fragment	Signal Transduction	NR	2e-73	M	185	0	0		3	0	ExpAA=0.06 First60=0.00 PredHel=0 Topology=o	185	0						CYT		21.286	9.83			0.696	2.707	0.005	mit						AgB01_g108_t02-IPRSCAN	IPR011009	Proteinkinase-likedomainsuperfamily	N	Too short sequence	-	No					-0.936784	0.00794849
108	AgB01_g109_t01	Serine/threonine-protein_kinase_Nek7	Mitogen-activated protein kinase kinase kinase 4 - probable fragment	Signal Transduction	NR	0	M	300	0	0		9	0	ExpAA=1.13 First60=1.04 PredHel=0 Topology=o	300	0						CYT		35.007	5.31			0.448	0.859	0.002	cyt		PF00069	Protein kinase domain			AgB01_g109_t01-IPRSCAN	IPR000719; IPR011009	Proteinkinasedomain; Proteinkinase-likedomainsuperfamily	N	-188.58	-	No					-0.932121	0.00815269
109	AgB01_g110_t02	warthog_protein_4	Sonic hedgehog - probable fragment - 3 predicted membrane helices	Signal Transduction / membrane	KOG	2e-40	V	509	0	1		11	0	ExpAA=40.50 First60=24.67 PredHel=2 Topology=o25-47i56-78o	509	2	8.6	89.6	1.8			CYT		57.258	8.85			0.691	2.317	0.005	exc				PTHR11889:SF40	2.9e-65	AgB01_g110_t02-IPRSCAN			N	-117.27	-	No					-0.971923	0.0065646
110	AgB01_g111_t03	propionyl-_carboxylase_beta	3-Methylcrotonyl-CoA carboxylase - probable fragment	Amino Acid Metabolism	KOG	0	M	356	0	1		5	0	ExpAA=5.14 First60=4.42 PredHel=0 Topology=o	356	0						CYT		38.883	5.33			0.561	1.201	0.002	cyt		PF01039	Carboxyl transferase domain	PTHR43842	2.6e-202	AgB01_g111_t03-IPRSCAN	IPR034733; IPR011763; IPR011762; IPR029045; IPR029045	Acetyl-CoAcarboxylase; Acetyl-coenzymeAcarboxyltransferase,C-terminal; Acetyl-coenzymeAcarboxyltransferase,N-terminal; ClpP/crotonase-likedomainsuperfamily	N	-157.31	-	No					-0.973996	0.00649089
111	AgB01_g112_t01	Propionyl-CoA_carboxylase_beta_chain	Unknown product	Unknown			M	36	0	0		1	0	ExpAA=0.83 First60=0.83 PredHel=0 Topology=o	36	0						CYT		3.988	9.79			#N/A	#N/A	#N/A	mit		PF01039	Carboxyl transferase domain	PTHR43842	2e-13	AgB01_g112_t01-IPRSCAN	IPR011762; IPR029045; IPR034733	Acetyl-coenzymeAcarboxyltransferase,N-terminal; ClpP/crotonase-likedomainsuperfamily; Acetyl-CoAcarboxylase	N	Too short sequence	-	No					-1.04049	0.00451651
112	AgB01_g113_t01	Propionyl-CoA_carboxylase_beta_chain	Unknown product	Unknown			M	133	0	1		2	0	ExpAA=12.30 First60=12.30 PredHel=1 Topology=i13-30o	133	1	12.8	77.4	9.8		103	CYT		15.54	10.62			0.85	4.695	0.009	mit		PF01039	Carboxyl transferase domain	PTHR43842	2.4e-24	AgB01_g113_t01-IPRSCAN	IPR029045; IPR011762; IPR034733	ClpP/crotonase-likedomainsuperfamily; Acetyl-coenzymeAcarboxyltransferase,N-terminal; Acetyl-CoAcarboxylase	N	Too short sequence	-	No					-0.931452	0.00818241
113	AgB01_g114_t01	hypothetical_protein	Unknown product	Unknown			M	335	0	1		5	0	ExpAA=0.12 First60=0.00 PredHel=0 Topology=o	335	0						CYT		38.129	5.85			0.498	1.002	0.002	cyt						AgB01_g114_t01-IPRSCAN	IPR015915; IPR015915	Kelch-typebetapropeller	N	-134.52	-	No					-0.890704	0.0102101
114	AgB01_g115_t06	hypothetical_protein	Unknown product - signalP detected	Unknown			W	338	0	0		15	0	ExpAA=31.44 First60=8.43 PredHel=1 Topology=o189-211i	338	1	6.5	55.9	37.6		127	SIG	32-33	38.408	7.91	34.861	8.2	0.552	1.563	0.003	end						AgB01_g115_t06-IPRSCAN			N	-116.22	-	No					-0.899392	0.00973979
115	AgB01_g116_t07	m-phase_mpp8	M-phase phosphoprotein 8 - ubiquitin protein ligase binding - cytoplasm - ubiquitin-protein transferase - nucleus - ubiquitin ligase complex - probable fragment	Proteasome	GO	1e-19	M	462	0	0		3	0	ExpAA=1.01 First60=0.00 PredHel=0 Topology=o	462	0						CYT		52.208	5.18			0.681	2.021	0.004	nuc	LDERKKR|GR 0.594 *ProP* ; ADKRRKR|PS 0.600 *ProP*	PF00385	Chromo (CHRromatin Organisation MOdifier) domain	PTHR22812:SF135	9.2e-12	AgB01_g116_t07-IPRSCAN	IPR023779; IPR000953; IPR023780; IPR016197; IPR017984; IPR000953	Chromodomain,conservedsite; Chromo/chromoshadowdomain; Chromodomain; Chromo-likedomainsuperfamily; Chromodomainsubgroup	N	-276.33	-	No					-0.975307	0.0064447
116	AgB01_g117_t01	putative_elongation_factor_1-beta_1-delta_2	Unknown product	Unknown			D	128	0	0		8	0	ExpAA=7.03 First60=3.71 PredHel=0 Topology=o	128	0						CYT		14.914	5.2			0.822	3.954	0.008	cyt						AgB01_g117_t01-IPRSCAN			N	Too short sequence	-	No					-0.987878	0.00601799
117	AgB01_g118_t03	Gonadotropin-releasing_hormone_receptor	Gonadotropin-releasing hormone receptor - probable fragment - 5 predicted membrane helices	Signal Transduction / membrane	NR	0	F	281	0	0		9	0	ExpAA=108.87 First60=7.08 PredHel=5 Topology=o52-74i95-117o122-144i192-210o258-280i	281	5	37.7	37.4	24.9			CYT		31.972	8.71			0.64	1.702	0.003	end		PF00001	7 transmembrane receptor (rhodopsin family)	PTHR24230:SF121	3.4e-31	AgB01_g118_t03-IPRSCAN	IPR000276; IPR017452	Gprotein-coupledreceptor,rhodopsin-like; GPCR,rhodopsin-like,7TM	N	-77.53	-	No					-0.931332	0.00818774
118	AgB01_g119_t01	serotonin_receptor	Unknown product - 2 predicted membrane helices	Unknown / membrane			C	128	0	0		8	0	ExpAA=40.32 First60=19.46 PredHel=2 Topology=i42-64o74-96i	128	2	34.4	7.8	57.8			ANC		14.562	9.46	11.983	9.33	0.324	0.603	0.001	mit	SISRQMR|AA 0.506 *ProP*	PF00001	7 transmembrane receptor (rhodopsin family)	PTHR43914	2.6e-23	AgB01_g119_t01-IPRSCAN	IPR000276; IPR017452	Gprotein-coupledreceptor,rhodopsin-like; GPCR,rhodopsin-like,7TM	N	Too short sequence	-	No					-0.914302	0.00898201
119	AgB01_g120_t01	Alpha-2A_adrenergic_receptor	adenylate cyclase-activating adrenergic receptor signaling pathway - cell-cell signaling - integral component of plasma - 2 predicted membrane helices	Signal Transduction / membrane	GO	6e-10	K	155	0	0	W(4.05)	7	0	ExpAA=46.96 First60=5.15 PredHel=2 Topology=i69-88o116-138i	155	2	26.5	18.1	55.5			ANC		17.973	8.9	14.933	9.1	0.427	1.272	0.003	end		PF00001	7 transmembrane receptor (rhodopsin family)	PTHR44672	3.6e-15	AgB01_g120_t01-IPRSCAN	IPR000276; IPR017452	Gprotein-coupledreceptor,rhodopsin-like; GPCR,rhodopsin-like,7TM	N	Too short sequence	-	No					-0.940687	0.00778152
120	AgB01_g121_t03	hypothetical_protein	hypothetical secreted protein precursor	Secreted / Unknown			G	423	0	1	T(6.05)	1	0	ExpAA=0.00 First60=0.00 PredHel=0 Topology=o	423	0						SIG	17-18	47.735	12.07	45.953	12.09	0.636	2.263	0.005	exc						AgB01_g121_t03-IPRSCAN			N	-128.35	-	No					-0.809389	0.0158561
121	AgB01_g122_t01	hypothetical_protein	Unknown product	Unknown			M	130	0	0	M(5.42)	3	0	ExpAA=0.02 First60=0.00 PredHel=0 Topology=o	130	0						CYT		14.43	8.52			0.839	4.096	0.008	nuc						AgB01_g122_t01-IPRSCAN			N	Too short sequence	-	No					-0.849752	0.012748
122	AgB01_g123_t20	nuclear_hormone_receptor_family_member_nhr-136	nuclear hormone receptor family member nhr-136 - probable fragment	Signal Transduction	NR	0	M	224	0	1		6	0	ExpAA=0.60 First60=0.00 PredHel=0 Topology=o	224	0						CYT		26.097	8.99			0.844	4.128	0.008	mit		PF00104	Ligand-binding domain of nuclear hormone receptor	PTHR24083:SF69	1.9e-25	AgB01_g123_t20-IPRSCAN	IPR035500; IPR000536; IPR000536	Nuclearhormonereceptor-likedomainsuperfamily; Nuclearhormonereceptor,ligand-bindingdomain	N	-165.43	-	No					-0.964076	0.00685126
123	AgB01_g124_t01	Nuclear_hormone_receptor_family_member_nhr-136	c4 zinc finger in nuclear hormone receptors - probable fragment	Signal Transduction	SMART	7e-14	M	132	0	1		8	0	ExpAA=0.04 First60=0.00 PredHel=0 Topology=o	132	0						CYT		14.654	6.04			0.916	6.29	0.013	nuc		PF00105	Zinc finger, C4 type (two domains)	PTHR24083	4.2e-19	AgB01_g124_t01-IPRSCAN	IPR013088; IPR001628; IPR001628	Zincfinger,NHR/GATA-type; Zincfinger,nuclearhormonereceptor-type	N	Too short sequence	-	No					-0.898512	0.00978641
124	AgB01_g125_t01	Nuclear_hormone_receptor_family_member_nhr-136	nuclear hormone receptor family member nhr-136	Signal Transduction	NR	9e-90	M	442	0	2		14	0	ExpAA=0.03 First60=0.00 PredHel=0 Topology=o	442	0						CYT		49.709	7.1			0.295	0.553	0.001	cyt	CRAFFRR|SF 0.523 *ProP*	PF00104; PF00105	Ligand-binding domain of nuclear hormone receptor; Zinc finger, C4 type (two domains)	PTHR24083	1.3e-60	AgB01_g125_t01-IPRSCAN	IPR000536; IPR001628; IPR001723; IPR013088; IPR035500	Nuclearhormonereceptor,ligand-bindingdomain; Zincfinger,nuclearhormonereceptor-type; Nuclearhormonereceptor; Zincfinger,NHR/GATA-type; Nuclearhormonereceptor-likedomainsuperfamily	N	-120.27	-	No					-0.981841	0.0062193
125	AgB01_g126_t01	Trans-2-enoyl-CoA_reductase_2	Unknown product	Unknown			M	133	0	1		2	0	ExpAA=0.00 First60=0.00 PredHel=0 Topology=o	133	0						CYT		14.266	8.91			0.397	0.764	0.002	cyt		PF08240	Alcohol dehydrogenase GroES-like domain	PTHR43981	3.5e-28	AgB01_g126_t01-IPRSCAN	IPR013154; IPR011032	Alcoholdehydrogenase,N-terminal; GroES-likesuperfamily	N	Too short sequence	-	No					-0.818903	0.0150622
126	AgB01_g127_t01	cuticle_collagen_6	cuticle collagen 6 - 2 predicted membrane helices	Extracellualr Matrix / membrane	NR	0	R	351	0	1	G(3.19)P(3.21)	10	0	ExpAA=20.40 First60=20.40 PredHel=1 Topology=i32-51o	351	1	5.4	85.5	9.1		300	CYT		36.354	8.69			0.468	0.759	0.002	nuc	QPSRRKR|AW 0.823 *ProP*	PF01391; PF01391; PF01484	Collagen triple helix repeat (20 copies); Collagen triple helix repeat (20 copies); Nematode cuticle collagen N-terminal domain	PTHR43926	1.1e-95	AgB01_g127_t01-IPRSCAN	IPR002486; IPR008160; IPR002486	Nematodecuticlecollagen,N-terminal; Collagentriplehelixrepeat	N	-147.1	-	No					-0.609243	0.0460575
127	AgB01_g128_t02	hypothetical_protein	Unknown product	Unknown			M	43	0	0		1	0	ExpAA=0.00 First60=0.00 PredHel=0 Topology=i	43	0						CYT		5.122	6.12			0.738	2.485	0.005	mit						AgB01_g128_t02-IPRSCAN			N	Too short sequence	-	No					-0.833602	0.013912
128	AgB01_g129_t01	hypothetical_protein	hypothetical secreted protein precursor	Secreted / Unknown			V	108	0	0		3	0	ExpAA=22.72 First60=22.72 PredHel=1 Topology=i5-27o	108	1	20.4	75	4.6		81	SIG	32-33	12.429	9.37	8.986	9.51	0.91	5.993	0.012	exc						AgB01_g129_t01-IPRSCAN			N	Too short sequence	-	No					-0.933926	0.00807304
129	AgB01_g130_t04	neuroligin-1	modulation of chemical synaptic transmission - gamma-aminobutyric acid receptor clustering - presynaptic membrane assembly - postsynaptic membrane - probable fragment	Signal Transduction	GO	4e-88	M	341	0	2		5	0	ExpAA=22.14 First60=0.00 PredHel=1 Topology=o162-184i	341	1	6.5	47.5	46		157	CYT		37.772	9.02			0.208	3.513	0.007	nuc		PF00135	Carboxylesterase family	PTHR43903	6.4e-26	AgB01_g130_t04-IPRSCAN	IPR029058; IPR002018; IPR029058	Alpha/Betahydrolasefold; Carboxylesterase,typeB	N	-129.76	-	No					-1.0222	0.00499065
130	AgB01_g131_t01	Neuroligin-1,_partial	Unknown product	Unknown			M	29	0	1	G(3.16)W(3.09)	1	0	ExpAA=0.92 First60=0.92 PredHel=0 Topology=o	29	0						CYT		2.886	3.8			#N/A	#N/A	#N/A	cyt		PF00135	Carboxylesterase family			AgB01_g131_t01-IPRSCAN	IPR002018	Carboxylesterase,typeB	N	Too short sequence	-	No					-0.930351	0.00823156
131	AgB01_g132_t01	Neuroligin-1,_partial	Acetylcholinesterase/Butyrylcholinesterase - probable fragment - signalP detected	Signal Transduction	KOG	5e-22	M	236	0	0		3	0	ExpAA=32.12 First60=19.94 PredHel=1 Topology=o5-27i	236	1	9.3	2.1	88.6		209	SIG	24-25	26.42	9.3	23.75	9.41	0.365	0.781	0.002	cyt		PF00135	Carboxylesterase family	PTHR43903	1.3e-53	AgB01_g132_t01-IPRSCAN	IPR029058; IPR002018; IPR029058	Alpha/Betahydrolasefold; Carboxylesterase,typeB	N	-147.92	-	No					-0.946091	0.00755601
132	AgB01_g133_t01	hypothetical_protein	Cuticle collagen dpy-5	Extracellular Matrix	NR	0	M	283	0	0	G(3.96)P(4.5)	8	0	ExpAA=21.18 First60=21.18 PredHel=1 Topology=i7-29o	283	1	7.8	89.8	2.5		254	CYT		28.303	9.22			0.455	1.332	0.003	mit	GRTRVAR|QI 0.654 *ProP*	PF01484; PF01391; PF01391	Nematode cuticle collagen N-terminal domain; Collagen triple helix repeat (20 copies); Collagen triple helix repeat (20 copies)	PTHR43896	4.7e-77	AgB01_g133_t01-IPRSCAN	IPR002486; IPR008160; IPR008160	Nematodecuticlecollagen,N-terminal; Collagentriplehelixrepeat	N	-166.91	-	No					0.205482	0.807966
133	AgB01_g134_t02	hypothetical_protein	Unknown product	Unknown			M	156	0	0	V(4.87)	2	0	ExpAA=0.69 First60=0.67 PredHel=0 Topology=o	156	0						CYT		16.511	5.05			0.504	1.076	0.002	end						AgB01_g134_t02-IPRSCAN			N	Too short sequence	-	No					-1.00911	0.00536025
134	AgB01_g135_t02	hypothetical_protein	serine/threonine-protein kinase clkA - probable fragment	Signal Transduction	REFSEQ-INVERTEBRATE	7e-24	M	128	0	0	N(10.9)	0	0	ExpAA=0.00 First60=0.00 PredHel=0 Topology=o	128	0						CYT		14.388	5.59			0.766	3.8	0.008	mit						AgB01_g135_t02-IPRSCAN			N	Too short sequence	-	No					-0.967204	0.00673553
135	AgB01_g136_t02	nuclear_hormone_receptor_family_member_nhr-1	nuclear hormone receptor family member nhr-1	Signal Transduction	NR	0	M	422	0	2		13	0	ExpAA=1.53 First60=0.00 PredHel=0 Topology=o	422	0						CYT		47.959	8.5			0.212	0.413	0.001	nuc	VERRRKR|KS 0.663 *ProP* ; ERRRKRK|SA 0.702 *ProP*	PF00105; PF00104	Zinc finger, C4 type (two domains); Ligand-binding domain of nuclear hormone receptor	PTHR24083	7.9e-103	AgB01_g136_t02-IPRSCAN	IPR000536; IPR001628; IPR001723; IPR035500; IPR013088	Nuclearhormonereceptor,ligand-bindingdomain; Zincfinger,nuclearhormonereceptor-type; Nuclearhormonereceptor; Nuclearhormonereceptor-likedomainsuperfamily; Zincfinger,NHR/GATA-type	N	-121.44	-	No					-0.914989	0.00894854
136	AgB01_g137_t01	hypothetical_protein	Unknown product	Unknown			M	58	0	0		2	0	ExpAA=0.04 First60=0.04 PredHel=0 Topology=o	58	0						CYT		6.594	6.51			0.816	4.13	0.008	nuc						AgB01_g137_t01-IPRSCAN			N	Too short sequence	-	No					-1.05166	0.00424934
137	AgB01_g138_t01	28s_ribosomal_protein	28s ribosomal protein	Protein Synthesis	NR	0	F	266	0	1		7	0	ExpAA=0.03 First60=0.03 PredHel=0 Topology=o	266	0						CYT		31.254	9.01			0.659	1.802	0.004	cyt				PTHR13329	2.6e-53	AgB01_g138_t01-IPRSCAN	IPR001648; IPR036870	RibosomalproteinS18; RibosomalproteinS18superfamily	N	-185.64	-	No					-0.903171	0.00954192
138	AgB01_g139_t02	pre-mrna-processing_factor_6	Unknown product	Unknown			S	258	0	1		5	0	ExpAA=0.00 First60=0.00 PredHel=0 Topology=o	258	0						CYT		30.251	8.98			0.881	5.16	0.01	cyt	RHGRRTK|SV 0.511 *ProP*	PF14559	Tetratricopeptide repeat	PTHR11246	2e-98	AgB01_g139_t02-IPRSCAN	IPR019734; IPR003107; IPR011990; IPR027108; IPR013026; IPR013026	Tetratricopeptiderepeat; HAT(Half-A-TPR)repeat; Tetratricopeptide-likehelicaldomainsuperfamily; Pre-mRNA-processingfactor6/Prp1/STA1; Tetratricopeptiderepeat-containingdomain	N	-199.34	-	No					-0.990748	0.00592458
139	AgB01_g140_t05	Pre-mRNA-processing_factor_6	HAT repeat protein - probable fragment	Transcription Machinery	KOG	0	M	577	0	2		8	0	ExpAA=0.58 First60=0.19 PredHel=0 Topology=o	577	0						CYT		64.476	6.29			0.443	0.856	0.002	nuc	KEYREKK|YK 0.523 *ProP*	PF06424	PRP1 splicing factor, N-terminal	PTHR11246:SF1	8.7e-210	AgB01_g140_t05-IPRSCAN	IPR010491; IPR011990; IPR027108; IPR003107; IPR011990	PRP1splicingfactor,N-terminal; Tetratricopeptide-likehelicaldomainsuperfamily; Pre-mRNA-processingfactor6/Prp1/STA1; HAT(Half-A-TPR)repeat	N	-152.02	-	No					-0.934375	0.00805336
140	AgB01_g141_t01	pre-mrna-processing_factor_6	hypothetical secreted protein precursor	Secreted / Unknown			M	144	0	0		4	0	ExpAA=0.06 First60=0.05 PredHel=0 Topology=i	144	0						SIG	29-30	16.211	10.29	12.864	9.57	0.89	5.553	0.011	mit						AgB01_g141_t01-IPRSCAN			N	Too short sequence	-	No					-1.01972	0.00505865
141	AgB01_g142_t04	guanylate_cyclase_receptor-type_gcy-1	guanylate cyclase receptor-type gcy-1	Signal Transduction	NR	0	I	483	0	1		13	0	ExpAA=24.56 First60=6.80 PredHel=0 Topology=o	483	0						CYT		54.641	5.63			0.83	3.8	0.008	end		PF07701; PF07714; PF00211	Heme NO binding associated; Protein tyrosine kinase; Adenylate and Guanylate cyclase catalytic domain	PTHR11920	1.5e-131	AgB01_g142_t04-IPRSCAN	IPR001054; IPR028082; IPR011645; IPR029787; IPR001245; IPR011009; IPR020635; IPR000719; IPR029787	Adenylylcyclaseclass-3/4/guanylylcyclase; Periplasmicbindingprotein-likeI; HaemNObindingassociated; Nucleotidecyclase; Serine-threonine/tyrosine-proteinkinase,catalyticdomain; Proteinkinase-likedomainsuperfamily; Tyrosine-proteinkinase,catalyticdomain; Proteinkinasedomain	N	-143.43	-	No	-29.1	1.4e-06	0.608274	RGC/RGC protein kinase	-0.953027	0.00727607
142	AgB01_g143_t01	hypothetical_protein	Unknown product	Unknown			Q	99	0	0	C(3.4)	8	0	ExpAA=2.40 First60=0.96 PredHel=0 Topology=o	99	0						CYT		11.616	8.5			0.426	0.872	0.002	nuc						AgB01_g143_t01-IPRSCAN			N	Too short sequence	-	No					-0.972754	0.00653496
143	AgB01_g144_t05	cyclic_amp-dependent_transcription_factor_atf-6_alpha	Unknown product	Unknown			V	232	0.431034	1	X(63.47)	5	0.431034	ExpAA=20.72 First60=0.00 PredHel=1 Topology=o209-231i	232	1	9.5	90.1	0.4	1	1	CYT		25.352	3.96			0.432	0.816	0.002	nuc						AgB01_g144_t05-IPRSCAN			N	-176.08	-	No					-0.913054	0.00904314
144	AgB01_g145_t02	Cytochrome_b5	Cytochrome b5 - 2 predicted membrane helices	Energy Metabolism / membrane	NR	2e-56	M	131	0	0		1	0	ExpAA=20.85 First60=0.00 PredHel=1 Topology=i108-130o	131	1	16.8	0.8	82.4	1	1	CYT		14.699	4.69			0.56	1.393	0.003	nuc		PF00173	Cytochrome b5-like Heme/Steroid binding domain	PTHR19359:SF70	2.9e-37	AgB01_g145_t02-IPRSCAN	IPR036400; IPR001199; IPR018506; IPR001199	Cytochromeb5-likeheme/steroidbindingdomainsuperfamily; Cytochromeb5-likeheme/steroidbindingdomain; Cytochromeb5,heme-bindingsite	N	Too short sequence	-	No					-0.935067	0.00802311
145	AgB01_g146_t01	Golgi_SNAP_receptor_complex_member_2	Golgi SNAP receptor complex member 2 partial - probable fragment	Protein Export	NR	1e-87	I	221	0	0		2	0	ExpAA=0.00 First60=0.00 PredHel=0 Topology=o	221	0						CYT		25.638	8			0.921	6.482	0.013	nuc	TRRRHQR|YK 0.672 *ProP*	PF12352	Snare region anchored in the vesicle membrane C-terminus	PTHR21230:SF1	4.8e-41	AgB01_g146_t01-IPRSCAN	IPR027027	GOSR2/Membrin/Bos1	N	-230.86	-	No					-0.974144	0.00648567
146	AgB01_g147_t01	Pappalysin-1,_partial	pappalysin-1 partial - probable fragment	Uncharacterized	NR	0	E	387	0	1		25	0	ExpAA=14.58 First60=0.08 PredHel=0 Topology=o	387	0						CYT		42.216	4.78			0.781	2.92	0.006	nuc		PF13948	Domain of unknown function (DUF4215)			AgB01_g147_t01-IPRSCAN	IPR011936; IPR011936	Myxococcuscysteine-richrepeat	N	-72.76	-	No					-0.964391	0.00683952
147	AgB01_g148_t01	hypothetical_protein	hypothetical protein tcan_17309 partial - probable fragment	Uncharacterized	NR	0	M	335	0	2		8	0	ExpAA=0.00 First60=0.00 PredHel=0 Topology=o	335	0						CYT		37.581	4.72			0.658	1.679	0.003	cyt				PTHR21542	1.5e-79	AgB01_g148_t01-IPRSCAN	IPR013320	ConcanavalinA-likelectin/glucanasedomainsuperfamily	N	-121.9	-	No					-0.89333	0.0100656
148	AgB01_g149_t01	Integrator_complex_subunit_2	Unknown product	Unknown			R	86	0	0		2	0	ExpAA=0.00 First60=0.00 PredHel=0 Topology=o	86	0						CYT		9.536	9.58			0.849	4.76	0.01	nuc						AgB01_g149_t01-IPRSCAN			N	Too short sequence	-	No					-0.957917	0.00708493
149	AgB01_g150_t01	integrator_complex_subunit_2	Unknown product	Unknown			M	318	0	2		8	0	ExpAA=0.41 First60=0.10 PredHel=0 Topology=o	318	0						CYT		36.311	6.02			0.528	1.086	0.002	nuc	GVHRMKR|LE 0.583 *ProP*	PF14750	Integrator complex subunit 2	PTHR28608	7.9e-61	AgB01_g150_t01-IPRSCAN	IPR029321; IPR029321	Integratorcomplexsubunit2	N	-126.64	-	No					-0.922855	0.008574
150	AgB01_g151_t03	protein_gtlf3b	Unknown product	Unknown			M	464	0	0		4	0	ExpAA=0.05 First60=0.00 PredHel=0 Topology=o	464	0						CYT		52.137	9.47			0.746	2.985	0.006	nuc	LKNRRFR|GI 0.669 *ProP*					AgB01_g151_t03-IPRSCAN			N	-153.7	-	No					-0.984622	0.00612575
151	AgB01_g152_t01	TRPL_translocation_defect_protein_14	TRPL translocation defect 14 - phosphatidylinositol binding - photoreceptor cell maintenance - cytosol - phosphatidic acid binding - GTP binding - - probable fragment	Signal Transduction	GO	3e-56	M	282	0	2		7	0	ExpAA=0.00 First60=0.00 PredHel=0 Topology=o	282	0						CYT		32.914	6.67			0.94	6.973	0.014	nuc				PTHR34932	2.8e-99	AgB01_g152_t01-IPRSCAN	IPR033469	CYTH-likedomainsuperfamily	N	-159.72	-	No					-0.96895	0.00667179
152	AgB01_g153_t02	TRPL_translocation_defect_protein_14	Unknown product	Unknown			M	76	0	0	C(4.43)W(4.72)	8	0	ExpAA=0.01 First60=0.01 PredHel=0 Topology=o	76	0						CYT		9.054	8.18			0.887	1.302	0.003	cyt						AgB01_g153_t02-IPRSCAN			N	Too short sequence	-	No					-1.02465	0.00492445
153	AgB01_g154_t01	hypothetical_protein	Unknown product	Unknown			G	93	0	0		2	0	ExpAA=0.02 First60=0.00 PredHel=0 Topology=o	93	0						CYT		10.418	6.78			0.689	2.3	0.005	nuc	TPNRKLR|GA 0.549 *ProP*					AgB01_g154_t01-IPRSCAN			N	Too short sequence	-	No					-0.968697	0.006681
154	AgB01_g155_t01	hypothetical_protein	hypothetical secreted protein precursor	Secreted / Unknown			M	97	0	0		2	0	ExpAA=0.01 First60=0.01 PredHel=0 Topology=o	97	0						SIG	16-17	11.363	5.37	9.52	7.97	0.803	3.334	0.007	mit						AgB01_g155_t01-IPRSCAN			N	Too short sequence	-	No					-1.0228	0.00497445
155	AgB01_g156_t01	homeobox-containing_protein_1	Unknown product - 2 predicted membrane helices - GPI anchored	Unknown / membrane / GPI			M	101	0	0		4	0	ExpAA=35.60 First60=11.86 PredHel=1 Topology=i70-92o	101	1	21.8	8.9	69.3		9	BL	82-83	11.521	6.88	2.246	3.67	0.374	0.758	0.002	cyt						AgB01_g156_t01-IPRSCAN			Y	Too short sequence	-	No					-0.918299	0.00878901
156	AgB01_g157_t01	hypothetical_protein	Pao retrotransposon peptidase - probable fragment	Transposable Elements	PFAM	4e-13	S	105	0	0		5	0	ExpAA=0.24 First60=0.13 PredHel=0 Topology=o	105	0						CYT		11.979	10.24			0.889	5.417	0.011	mit	SNMRQQR|FI 0.510 *ProP*	PF05380	Pao retrotransposon peptidase	PTHR22955	9.6e-13	AgB01_g157_t01-IPRSCAN	IPR008042	Retrotransposon,Pao	N	Too short sequence	-	No					-0.980092	0.00627883
157	AgB01_g158_t01	hypothetical_protein	Reverse transcriptase - probable fragment	Transposable Elements	CDD	3e-32	M	135	0	0		4	0	ExpAA=15.29 First60=4.90 PredHel=0 Topology=o	135	0						CYT		15.359	8.38			0.526	1.09	0.002	mit		PF00078	Reverse transcriptase (RNA-dependent DNA polymerase)			AgB01_g158_t01-IPRSCAN	IPR000477	Reversetranscriptasedomain	N	Too short sequence	-	No					-0.988452	0.00599921
158	AgB01_g159_t01	hypothetical_protein	Unknown product	Unknown			M	61	0	0		1	0	ExpAA=0.03 First60=0.03 PredHel=0 Topology=o	61	0						CYT		7.227	10.28			0.751	2.568	0.005	cyt						AgB01_g159_t01-IPRSCAN			N	Too short sequence	-	No					-0.755823	0.0211552
159	AgB01_g160_t01	Putative_glycosyltransferase_C06E1.7	glycosyltransferase C06E1.7 - probable fragment	Carbohydrate Metabolism	NR	4e-69	Q	200	0	0		2	0	ExpAA=0.90 First60=0.00 PredHel=0 Topology=o	200	0						CYT		22.706	8.96			0.446	0.861	0.002	mit		PF01531	Glycosyl transferase family 11	PTHR22898	1.7e-49	AgB01_g160_t01-IPRSCAN	IPR002516	Glycosyltransferase,family11	N	Too short sequence	-	No					-0.988852	0.00598614
160	AgB01_g161_t01	ATP-binding_cassette_sub-family_F_member_1	transporter (ABC superfamily)	Transporters	KOG	0	M	639	0	1		3	0	ExpAA=0.00 First60=0.00 PredHel=0 Topology=o	639	0						CYT		71.347	6.07			0.371	0.743	0.001	cyt		PF12848; PF00005; PF00005	ABC transporter; ABC transporter; ABC transporter	PTHR19211	2e-294	AgB01_g161_t01-IPRSCAN	IPR017871; IPR032781; IPR003439; IPR003593; IPR027417; IPR027417	ABCtransporter,conservedsite; ABC-transporterextensiondomain; ABCtransporter-like; AAA+ATPasedomain; P-loopcontainingnucleosidetriphosphatehydrolase	N	-209.96	-	No					-0.937163	0.00793213
161	AgB01_g162_t01	hypothetical_protein	Unknown product	Unknown			M	154	0	0	K(3.03)	3	0	ExpAA=0.00 First60=0.00 PredHel=0 Topology=o	154	0						CYT		17.739	10.26			0.423	0.914	0.002	nuc	AQRREKR|QQ 0.599 *ProP*					AgB01_g162_t01-IPRSCAN			N	Too short sequence	-	No					-0.984834	0.00611867
162	AgB01_g163_t01	hypothetical_protein	Pao retrotransposon peptidase family protein - probable fragment	Transposable Elements	NR	2e-16	M	432	0	3		7	0	ExpAA=0.00 First60=0.00 PredHel=0 Topology=o	432	0						CYT		49.272	8.73			0.647	1.744	0.003	nuc		PF03564	Protein of unknown function (DUF1759)	PTHR21166:SF4	1.7e-15	AgB01_g163_t01-IPRSCAN	IPR005312	ProteinofunknownfunctionDUF1759	N	-161.23	-	No					-0.942895	0.00768857
163	AgB01_g164_t01	hypothetical_protein	Unknown product	Unknown			M	102	0	0		4	0	ExpAA=0.38 First60=0.38 PredHel=0 Topology=o	102	0						CYT		11.489	8.8			0.78	3.269	0.007	nuc						AgB01_g164_t01-IPRSCAN			N	Too short sequence	-	No					-0.880074	0.0108163
164	AgB01_g165_t03	transmembrane_protein	Transmembrane family - probable fragment - 6 predicted membrane helices	Transporters / membrane	PFAM	1e-56	M	243	0	0		5	0	ExpAA=117.32 First60=42.18 PredHel=5 Topology=i7-29o39-58i65-87o127-146i198-220o	243	5	42.8	30	27.2			CYT		26.722	9.77			0.972	7.351	0.015	end		PF07857	Transmembrane family, TMEM144 of transporters	PTHR16119	4.9e-65	AgB01_g165_t03-IPRSCAN	IPR012435; IPR010651	TMEM144; Sugartransportprotein	N	-77.45	-	No					-1.03613	0.00462551
165	AgB01_g166_t02	o-phosphoseryl-trna_selenium_transferase	Unknown product	Unknown			M	126	0	0		8	0	ExpAA=0.07 First60=0.00 PredHel=0 Topology=o	126	0						CYT		13.814	8.88			0.873	4.829	0.01	nuc				PTHR12944	3e-15	AgB01_g166_t02-IPRSCAN	IPR019872	O-phosphoseryl-tRNA(Sec)seleniumtransferase	N	Too short sequence	-	No					-0.9993	0.00565471
166	AgB01_g167_t01	O-phosphoseryl-tRNA(Sec)_selenium_transferase	Unknown product	Unknown			M	152	0	0		3	0	ExpAA=0.01 First60=0.00 PredHel=0 Topology=o	152	0						CYT		16.938	6.42			0.592	1.397	0.003	cyt		PF05889	O-phosphoseryl-tRNA(Sec) selenium transferase, SepSecS	PTHR12944	1.8e-41	AgB01_g167_t01-IPRSCAN	IPR019872; IPR015422; IPR008829; IPR015424	O-phosphoseryl-tRNA(Sec)seleniumtransferase; Pyridoxalphosphate-dependenttransferasedomain1; SepSecS/SepCysSfamily; Pyridoxalphosphate-dependenttransferase	N	Too short sequence	-	No					-0.857225	0.0122425
167	AgB01_g168_t02	Forkhead_box_protein_F1	Unknown product	Unknown			M	197	0	0		3	0	ExpAA=4.42 First60=0.00 PredHel=0 Topology=o	197	0						CYT		19.827	6.8			0.807	3.584	0.007	nuc						AgB01_g168_t02-IPRSCAN			N	Too short sequence	-	No					-0.842918	0.0132284
168	AgB01_g169_t01	hypothetical_protein	Unknown product	Unknown			M	103	0	0		3	0	ExpAA=19.16 First60=16.61 PredHel=1 Topology=o15-37i	103	1	21.4	14.6	64.1		66	CYT		12.051	8.5			0.144	0.296	0.001	cyt						AgB01_g169_t01-IPRSCAN			N	Too short sequence	-	No					-0.873875	0.0111862
169	AgB01_g170_t02	lipase_family_protein	lipase family protein - signalP detected	Secreted / Lipid Metabolism / lipase	NR	0	M	302	0	0		11	0	ExpAA=16.42 First60=14.19 PredHel=1 Topology=i7-29o	302	1	7.3	90.4	2.3		273	SIG	20-21	33.743	7	31.392	6.81	0.736	2.527	0.005	exc		PF01674	Lipase (class 2)	PTHR32015:SF3	1.8e-79	AgB01_g170_t02-IPRSCAN	IPR002918; IPR029058; IPR029058	LipaseEstA/EsteraseEstB; Alpha/Betahydrolasefold	N	-119.75	-	No					-0.996217	0.00575055
170	AgB01_g171_t01	lipase_family_protein	Unknown product	Unknown			M	47	0	0	C(3.58)	4	0	ExpAA=0.64 First60=0.64 PredHel=0 Topology=o	47	0						CYT		5.603	9.56			0.888	5.349	0.011	nuc						AgB01_g171_t01-IPRSCAN			N	Too short sequence	-	No					-0.991081	0.00591385
171	AgB01_g172_t01	lipase_family_protein	lipase family protein - signalP detected	Secreted / Lipid Metabolism / lipase	NR	0	M	313	0	0		11	0	ExpAA=0.23 First60=0.09 PredHel=0 Topology=o	313	0						SIG	18-19	34.827	8.71	32.818	8.49	0.641	1.626	0.003	end		PF01674	Lipase (class 2)	PTHR32015	1.6e-78	AgB01_g172_t01-IPRSCAN	IPR002918; IPR029058; IPR029058	LipaseEstA/EsteraseEstB; Alpha/Betahydrolasefold	N	-124.34	-	No					-0.94616	0.0075532
172	AgB01_g173_t04	60S_ribosomal_protein_L24	60S ribosomal protein L24 - probable fragment	Protein Synthesis	NR	9e-39	M	116	0.862069	0	X(126.95)	3	0.862069	ExpAA=0.15 First60=0.15 PredHel=0 Topology=o	116	0						CYT		13.333	10.45			0.853	4.591	0.009	nuc	HGKRLVR|SD 0.563 *ProP* ; YRRKHKK|GV 0.514 *ProP* ; QKRRTKR|VI 0.678 *ProP*	PF01246	Ribosomal protein L24e	PTHR10792:SF1	4.8e-31	AgB01_g173_t04-IPRSCAN	IPR000988; IPR038630; IPR011017	RibosomalproteinL24e-related; RibosomalproteinL24e/L24superfamily; TRASHdomain	N	Too short sequence	-	No					-1.00408	0.00550923
173	AgB01_g174_t02	DNA-directed_RNA_polymerase_II_subunit_RPB1	mitogen-activated protein kinase kinase kinase 2 - 5 predicted membrane helices	Signal Transduction / membrane	REFSEQ-INVERTEBRATE	4e-05	M	638	0	2		7	0	ExpAA=76.04 First60=30.70 PredHel=4 Topology=o5-27i34-51o80-102i109-131o	638	4	13	84.8	2.2			CYT		71.699	9.22			0.93	5.677	0.011	nuc	PMGRDRR|MM 0.508 *ProP* ; IGQRSRR|FT 0.732 *ProP* ; ATNRTRR|NS 0.516 *ProP* ; TSSRAKK|IS 0.633 *ProP*					AgB01_g174_t02-IPRSCAN			N	-74.73	-	No					-0.994798	0.00579522
174	AgB01_g175_t13	Heterogeneous_nuclear_ribonucleoprotein_A1,_partial	RNA-binding protein musashi/mRNA cleavage and polyadenylation factor I complex	Transcription Machinery	KOG	2e-49	M	345	0	3	G(4.42)	3	0	ExpAA=0.14 First60=0.00 PredHel=0 Topology=o	345	0						CYT		36.299	8.57			0.064	0.151	0	cyt	RMDRMAR|SR 0.538 *ProP*	PF00076; PF00076	RNA recognition motif. (a.k.a. RRM, RBD, or RNP domain); RNA recognition motif. (a.k.a. RRM, RBD, or RNP domain)	PTHR43921:SF2	2.7e-104	AgB01_g175_t13-IPRSCAN	IPR000504; IPR035979; IPR012677; IPR012677	RNArecognitionmotifdomain; RNA-bindingdomainsuperfamily; Nucleotide-bindingalpha-betaplaitdomainsuperfamily	N	-193.56	-	No					-1.06732	0.00390109
175	AgB01_g176_t04	Heterogeneous_nuclear_ribonucleoprotein_A1	RNA-binding protein musashi/mRNA cleavage and polyadenylation factor I complex	Transcription Machinery	KOG	4e-51	M	355	0	2	G(4.76)	4	0	ExpAA=0.00 First60=0.00 PredHel=0 Topology=o	355	0						CYT		36.909	9.01			0.064	0.15	0	cyt		PF00076; PF00076	RNA recognition motif. (a.k.a. RRM, RBD, or RNP domain); RNA recognition motif. (a.k.a. RRM, RBD, or RNP domain)	PTHR43921	1.6e-94	AgB01_g176_t04-IPRSCAN	IPR035979; IPR012677; IPR000504; IPR000504	RNA-bindingdomainsuperfamily; Nucleotide-bindingalpha-betaplaitdomainsuperfamily; RNArecognitionmotifdomain	N	-175.6	-	No					-0.960733	0.00697713
176	AgB01_g177_t01	Heterogeneous_nuclear_ribonucleoprotein_A1,_partial	Unknown product	Unknown			L	62	0	0		4	0	ExpAA=0.00 First60=0.00 PredHel=0 Topology=o	62	0						CYT		7.153	4.55			0.676	2.085	0.004	cyt						AgB01_g177_t01-IPRSCAN			N	Too short sequence	-	No					-0.830073	0.0141801
177	AgB01_g178_t03	wu:fc32f04_protein	Unknown product	Unknown			D	543	0	0		13	0	ExpAA=0.24 First60=0.15 PredHel=0 Topology=o	543	0						CYT		61.011	8.72			0.527	1.167	0.002	nuc	TSRRCKK|AY 0.519 *ProP* ; EDIRPKR|IA 0.544 *ProP* ; RSHRSLR|ST 0.639 *ProP*					AgB01_g178_t03-IPRSCAN			N	-258.32	-	No					-0.927153	0.00837597
178	AgB01_g179_t01	hypothetical_protein	Unknown product	Unknown			M	68	0	0		2	0	ExpAA=1.97 First60=1.97 PredHel=0 Topology=o	68	0						CYT		7.812	10.53			0.918	6.394	0.013	cyt						AgB01_g179_t01-IPRSCAN			N	Too short sequence	-	No					-1.01241	0.00526442
179	AgB01_g180_t01	hypothetical_protein	Unknown product	Unknown			M	110	0	0		5	0	ExpAA=22.00 First60=3.06 PredHel=0 Topology=i	110	0						CYT		12.84	9.08			0.307	0.606	0.001	mit						AgB01_g180_t01-IPRSCAN			N	Too short sequence	-	No					-0.909746	0.00920715
180	AgB01_g181_t01	hypothetical_protein	Unknown product - 2 predicted membrane helices	Unknown / membrane			M	104	0	0		5	0	ExpAA=22.63 First60=20.72 PredHel=1 Topology=i41-63o	104	1	21.2	39.4	39.4		41	ANC		11.728	9.26	8.407	9.44	0.876	5.197	0.01	nuc						AgB01_g181_t01-IPRSCAN			N	Too short sequence	-	No					-1.00874	0.00537086
181	AgB01_g182_t01	hypothetical_protein	Unknown product - signalP detected - 2 predicted membrane helices	Unknown / membrane			M	274	0	0		6	0	ExpAA=43.86 First60=43.74 PredHel=2 Topology=i5-27o31-53i	274	2	16.1	1.5	82.5		221	SIG	24-25	30.112	6.74	27.721	6.92	0.271	0.613	0.001	end						AgB01_g182_t01-IPRSCAN			N	-131.06	-	No					-0.894437	0.0100053
182	AgB01_g183_t04	Serine/threonine-protein_kinase	serine threonine-protein kinase-transforming protein mos	Signal Transduction	NR	0	M	377	0	0		13	0	ExpAA=0.24 First60=0.00 PredHel=0 Topology=o	377	0						CYT		41.994	8.51			0.538	1.314	0.003	nuc	LYRRTKR|QL 0.541 *ProP*	PF00069	Protein kinase domain	PTHR44448	5.4e-65	AgB01_g183_t04-IPRSCAN	IPR008271; IPR011009; IPR000719; IPR017441	Serine/threonine-proteinkinase,activesite; Proteinkinase-likedomainsuperfamily; Proteinkinasedomain; Proteinkinase,ATPbindingsite	N	-117.02	-	No	127.8	4.2e-35	0.803919	serine/threonine protein kinase	-0.977088	0.00638246
183	AgB01_g184_t01	hypothetical_protein	Unknown product	Unknown			I	104	0.961538	0	X(141.6)	3	0.961538	ExpAA=22.43 First60=19.46 PredHel=1 Topology=o46-68i	104	1	21.2	44.2	34.6		36	ANC		12.071	10.58	3.462	8.16	0.457	1.115	0.002	gol						AgB01_g184_t01-IPRSCAN			N	Too short sequence	-	No					-0.87663	0.0110203
184	AgB01_g185_t03	hypothetical_protein	Mucin 68D - extracellular matrix structural constituent - extracellular matrix - extracellular region - chitin binding - chitin metabolic process - signalP detected	Secreted / Mucin / extmat	GO	2e-09	M	934	0	2		31	0	ExpAA=5.25 First60=5.25 PredHel=0 Topology=o	934	0						SIG	20-21	103.116	5.27	101.113	5.27	0.505	1.046	0.002	exc						AgB01_g185_t03-IPRSCAN			N	-118.35	-	No					-0.980202	0.00627508
185	AgB01_g186_t03	hypothetical_protein	Unknown product	Unknown			M	100	0	0		4	0	ExpAA=22.20 First60=22.20 PredHel=1 Topology=i21-43o	100	1	22	57	21		57	BL/ANC		11.728	11.17			0.931	6.664	0.013	mit	LLSRRIR|SF 0.534 *ProP*					AgB01_g186_t03-IPRSCAN			N	Too short sequence	-	No					-0.948629	0.00745236
186	AgB01_g187_t01	hypothetical_protein	Unknown product	Unknown			A	104	0	0		5	0	ExpAA=0.65 First60=0.46 PredHel=0 Topology=o	104	0						CYT		11.71	9.6			0.637	1.775	0.004	nuc						AgB01_g187_t01-IPRSCAN			N	Too short sequence	-	No					-0.882383	0.0106817
187	AgB01_g188_t01	hypothetical_protein	hypothetical secreted protein precursor	Secreted / Unknown			M	204	0	0		5	0	ExpAA=0.15 First60=0.00 PredHel=0 Topology=o	204	0						SIG	20-21	23.611	9.21	21.181	8.87	0.561	1.365	0.003	mit						AgB01_g188_t01-IPRSCAN			N	-231.63	-	No					-0.876971	0.0109999
188	AgB01_g189_t01	gamma-2-syntrophin	Syntrophins (type beta)	Extracellular Matrix	KOG	2e-51	M	521	0	2		8	0	ExpAA=0.01 First60=0.00 PredHel=0 Topology=o	521	0						CYT		58.843	7.22			0.342	0.631	0.001	cyt		PF00595	PDZ domain (Also known as DHR or GLGF)	PTHR10554:SF1	1.9e-191	AgB01_g189_t01-IPRSCAN	IPR001478; IPR001849; IPR036034; IPR015482; IPR011993	PDZdomain; Pleckstrinhomologydomain; PDZsuperfamily; Syntrophin; PH-likedomainsuperfamily	N	-181.97	-	No					-0.961401	0.00695178
189	AgB01_g190_t01	Clc-like_protein_2	epithelial cell-cell adhesion - integral component of membrane - membrane - plasma membrane - molecular_function - signalP detected - 4 predicted membrane helices	Extracellualr Matrix / membrane	GO	2e-20	M	245	0	0		8	0	ExpAA=90.82 First60=22.78 PredHel=4 Topology=i13-35o94-116i128-150o178-200i	245	4	35.9	35.5	28.6			SIG	27-28	27.603	8.41	24.647	8.54	0.173	0.358	0.001	end		PF07062	Clc-like	PTHR10671	8.7e-24	AgB01_g190_t01-IPRSCAN	IPR010761	Clcprotein-like	N	-98.28	-	No					-0.853487	0.0124929
190	AgB01_g191_t02	hypothetical_protein	hypothetical secreted protein precursor	Secreted / Unknown			M	131	0	0	C(3.21)	10	0	ExpAA=1.89 First60=1.89 PredHel=0 Topology=o	131	0						SIG	24-25	14.99	8.72	12.362	8.87	0.937	6.88	0.014	exc						AgB01_g191_t02-IPRSCAN			N	Too short sequence	-	No					-0.995314	0.00577893
191	AgB01_g192_t01	hypothetical_protein	Unknown product	Unknown			M	164	0	0		7	0	ExpAA=0.00 First60=0.00 PredHel=0 Topology=o	164	0						CYT		18.889	9.39			0.908	5.986	0.012	nuc						AgB01_g192_t01-IPRSCAN			N	Too short sequence	-	No					-0.994896	0.0057921
192	AgB01_g193_t02	hypothetical_protein	Unknown product	Unknown			M	152	0	0	C(3.88)	14	0	ExpAA=4.50 First60=4.50 PredHel=0 Topology=o	152	0						CYT		16.56	8.39			0.907	5.958	0.012	nuc						AgB01_g193_t02-IPRSCAN			N	Too short sequence	-	No					-0.948271	0.00746692
193	AgB01_g194_t02	clc-like_protein_2	epithelial cell-cell adhesion - integral component of membrane - membrane - plasma membrane - molecular_function - signalP detected - 4 predicted membrane helices	Extracellualr Matrix / membrane	GO	1e-54	M	242	0	2		4	0	ExpAA=89.47 First60=22.50 PredHel=4 Topology=i13-35o95-114i127-149o174-196i	242	4	35.1	35.1	29.8			SIG	28-29	27.705	7.08	24.722	7.03	0.171	0.345	0.001	end		PF07062	Clc-like	PTHR10671:SF54	4.3e-59	AgB01_g194_t02-IPRSCAN	IPR010761; IPR017974	Clcprotein-like; Claudin,conservedsite	N	-85.5	-	No					-0.923808	0.00852969
194	AgB01_g195_t02	Clc-like_protein_5	Unknown product	Unknown			M	135	0	0		1	0	ExpAA=23.25 First60=23.25 PredHel=1 Topology=i20-42o	135	1	16.3	68.9	14.8		93	ANC		15.004	6.04	10.136	5.39	0.908	5.904	0.012	mit		PF07062	Clc-like	PTHR10671	4.4e-18	AgB01_g195_t02-IPRSCAN	IPR010761	Clcprotein-like	N	Too short sequence	-	No					-1.02605	0.00488691
195	AgB01_g196_t01	Clc-like_protein_5	hypothetical protein ASU_01823	Uncharacterized	NR	0	M	280	0	0		7	0	ExpAA=0.02 First60=0.02 PredHel=0 Topology=o	280	0						CYT		32.517	9.57			0.818	3.776	0.008	mit		PF12796	Ankyrin repeats (3 copies)	PTHR44181	2.5e-15	AgB01_g196_t01-IPRSCAN	IPR020683; IPR036770; IPR002110; IPR020683	Ankyrinrepeat-containingdomain; Ankyrinrepeat-containingdomainsuperfamily; Ankyrinrepeat	N	-196.38	-	No					-0.970258	0.00662442
196	AgB01_g197_t01	Serine_protease,_partial	Serine carboxypeptidase S28 - signalP detected - GPI anchored	Secreted / Protease / GPI	CDD	0	T	563	0	2		8	0	ExpAA=19.58 First60=16.90 PredHel=1 Topology=i13-30o	563	1	3	94.7	2.3		533	SIG	26-27	62.68	5.66	60.02	5.49	0.729	1.656	0.003	exc		PF05577	Serine carboxypeptidase S28	PTHR11010	3.9e-162	AgB01_g197_t01-IPRSCAN	IPR029058; IPR008758; IPR029058	Alpha/Betahydrolasefold; PeptidaseS28	Y	-111.35	-	No					-0.914533	0.00897075
197	AgB01_g198_t01	surf1-like_protein	Unknown product	Unknown			P	139	0	0		8	0	ExpAA=1.44 First60=0.02 PredHel=0 Topology=o	139	0						CYT		15.628	9.26			0.635	6.386	0.013	cyt	GVQRSKR|NL 0.607 *ProP*					AgB01_g198_t01-IPRSCAN			N	Too short sequence	-	No					-0.904866	0.00945448
198	AgB01_g199_t10	THO_complex_subunit_7	Protein CBG22401 - mRNA export from nucleus - transcription elongation from RNA polymerase II promoter - nucleic acid binding - chromosome	Transcription Machinery	GO	2e-37	M	212	0	1		3	0	ExpAA=0.00 First60=0.00 PredHel=0 Topology=o	212	0						CYT		24.626	5.65			0.357	0.673	0.001	nuc		PF05615	Tho complex subunit 7	PTHR23405	4.4e-32	AgB01_g199_t10-IPRSCAN	IPR008501	THOcomplexsubunit7/Mft1	N	-277.45	-	No					-0.970103	0.00663
199	AgB01_g200_t03	Protein_tyrosine_phosphatase_type_IVA_3	dual specificity protein phosphatase CDC14B (Loa loa)	Signal Transduction	NR	5e-83	M	186	0	0		5	0	ExpAA=1.54 First60=0.00 PredHel=0 Topology=o	186	0						CYT		20.984	9.08			0.898	5.679	0.011	mit	LIRRHRR|GA 0.622 *ProP*	PF00102	Protein-tyrosine phosphatase	PTHR23339:SF65	1.2e-61	AgB01_g200_t03-IPRSCAN	IPR029021; IPR000387; IPR000242	Protein-tyrosinephosphatase-like; Tyrosinespecificproteinphosphatasesdomain; PTPtypeproteinphosphatase	N	Too short sequence	-	No					-0.806045	0.0161448
200	AgB01_g201_t04	Nuclear_hormone_receptor_family_member_nhr-1	Nuclear hormone receptor family member nhr-1 - probable fragment	Signal Transduction	NR	6e-77	M	254	0	1		5	0	ExpAA=2.25 First60=0.00 PredHel=0 Topology=o	254	0						CYT		28.484	6.01			0.641	1.718	0.003	nuc						AgB01_g201_t04-IPRSCAN			N	-192.95	-	No					-0.968258	0.00669698
201	AgB01_g202_t01	hypothetical_protein	Unknown product	Unknown			M	61	0	0	F(3.49)	2	0	ExpAA=18.31 First60=18.31 PredHel=1 Topology=o5-27i	61	1	36.1	8.2	55.7		34	CYT		7.343	10.19			0.504	1.107	0.002	nuc						AgB01_g202_t01-IPRSCAN			N	Too short sequence	-	No					-1.01705	0.00513296
202	AgB01_g203_t01	Dehydrogenase/reductase_SDR_family_member_7B	Unknown product	Unknown			M	100	0	2		4	0	ExpAA=34.55 First60=8.71 PredHel=1 Topology=o71-93i	100	1	22	71	7		7	CYT		11.088	8.4			0.298	0.606	0.001	mit		PF04930	FUN14 family			AgB01_g203_t01-IPRSCAN	IPR007014	FUN14	N	Too short sequence	-	No					-0.997101	0.0057229
203	AgB01_g204_t15	Niemann-Pick_C1_protein	Patched family - 12 predicted membrane helices	Signal Transduction / membrane	CDD	0	M	981	0	1		13	0	ExpAA=262.74 First60=9.95 PredHel=12 Topology=i55-77o333-355i368-390o400-422i447-469o484-506i559-581o768-787i794-816o820-842i867-889o904-923i	981	12	26.3	49.6	24.1			CYT		110.595	6.55			0.386	1.072	0.002	end	SSHRRTR|AI 0.580 *ProP* ; SDSRLRR|AD 0.512 *ProP*	PF02460	Patched family	PTHR10796	8.9e-148	AgB01_g204_t15-IPRSCAN	IPR000731; IPR003392	Sterol-sensingdomain; Proteinpatched/dispatched	N	-122.33	-	No					-0.986916	0.00604964
204	AgB01_g205_t01	hypothetical_protein	Unknown product	Unknown			M	108	0	0	F(4.17)	7	0	ExpAA=38.79 First60=23.56 PredHel=1 Topology=i13-35o	108	1	20.4	67.6	12		73	BL/ANC		13.194	9.57			0.93	6.63	0.013	end						AgB01_g205_t01-IPRSCAN			N	Too short sequence	-	No					-0.995978	0.00575806
205	AgB01_g206_t02	nematode_cuticle_collagen_domain-containing_protein	Collagen alpha-4(VI) chain partial	Extracellular Matrix	NR	0	T	321	0	1	G(3.03)	6	0	ExpAA=0.00 First60=0.00 PredHel=0 Topology=o	321	0						CYT		34.447	9.17			0.746	2.469	0.005	nuc	TLNRDRR|SP 0.525 *ProP*	PF01391; PF01391	Collagen triple helix repeat (20 copies); Collagen triple helix repeat (20 copies)	PTHR43896	3.2e-54	AgB01_g206_t02-IPRSCAN	IPR008160; IPR008160	Collagentriplehelixrepeat	N	-229.39	-	No					-0.486478	0.0864693
206	AgB01_g207_t02	kynureninase	kynureninase - probable fragment	Uncharacterized	NR	6e-30	M	66	0	0		2	0	ExpAA=0.00 First60=0.00 PredHel=0 Topology=i	66	0						CYT		7.668	9.7			0.815	3.763	0.008	nuc		PF04500	FLYWCH zinc finger domain			AgB01_g207_t02-IPRSCAN	IPR007588	Zincfinger,FLYWCH-type	N	Too short sequence	-	No					-1.01406	0.00521722
207	AgB01_g208_t01	Kynureninase	L-kynurenine hydrolase	Amino Acid Metabolism	KOG	0	M	462	0	2		12	0	ExpAA=0.15 First60=0.00 PredHel=0 Topology=o	462	0						CYT		52.631	6.03			0.406	0.76	0.002	cyt		PF00266	Aminotransferase class-V	PTHR14084:SF0	1.5e-197	AgB01_g208_t01-IPRSCAN	IPR015421; IPR010111; IPR000192; IPR015422; IPR015424	Pyridoxalphosphate-dependenttransferase,majordomain; Kynureninase; AminotransferaseclassVdomain; Pyridoxalphosphate-dependenttransferasedomain1; Pyridoxalphosphate-dependenttransferase	N	-124.39	-	No					-1.00004	0.0056318
208	AgB01_g209_t02	Kynureninase	cytosolic large ribosomal subunit - rRNA binding - translation - structural constituent of ribosome - ribosomal large	Protein Synthesis	GO	4e-75	M	356	0	0		9	0	ExpAA=0.29 First60=0.24 PredHel=0 Topology=o	356	0						CYT		39.927	5.45			0.645	1.62	0.003	nuc		PF13847	Methyltransferase domain	PTHR45581	1.5e-103	AgB01_g209_t02-IPRSCAN	IPR029063; IPR025714	S-adenosyl-L-methionine-dependentmethyltransferase; Methyltransferasedomain	N	-144.88	-	No					-0.940748	0.00777891
209	AgB01_g210_t04	Cell_division_protein_kinase_9	Cdc2-related protein kinase - probable fragment	Nuclear Regulation	KOG	0	M	431	0	2		6	0	ExpAA=0.01 First60=0.00 PredHel=0 Topology=o	431	0						CYT		48.683	9.38			0.312	0.585	0.001	mit		PF00069	Protein kinase domain	PTHR24056	2.3e-124	AgB01_g210_t04-IPRSCAN	IPR017441; IPR011009; IPR000719; IPR008271	Proteinkinase,ATPbindingsite; Proteinkinase-likedomainsuperfamily; Proteinkinasedomain; Serine/threonine-proteinkinase,activesite	N	-145.62	-	No	235.1	2.1e-67	0.838824	CMGC/CDK/CDK9 protein kinase	-1.01088	0.00530859
210	AgB01_g211_t01	hypothetical_protein	Unknown product - 2 predicted membrane helices	Unknown / membrane			M	145	0	0		2	0	ExpAA=46.39 First60=23.15 PredHel=2 Topology=i31-53o68-90i	145	2	30.3	10.3	59.3			CYT		16.716	8.56			0.873	5.194	0.01	end						AgB01_g211_t01-IPRSCAN			N	Too short sequence	-	No					-0.949118	0.00743257
211	AgB01_g212_t04	Cuticle_collagen_12	Cuticle collagen 40	Extracellular Matrix	NR	0	M	304	0	0	G(3.68)P(3.44)	9	0	ExpAA=22.71 First60=22.71 PredHel=1 Topology=i19-41o	304	1	7.2	86.5	6.3		263	CYT		30.067	4.86			0.228	0.444	0.001	nuc	KGIRSKR|NA 0.589 *ProP*	PF01484; PF01391; PF01391	Nematode cuticle collagen N-terminal domain; Collagen triple helix repeat (20 copies); Collagen triple helix repeat (20 copies)	PTHR43926:SF9	2.1e-103	AgB01_g212_t04-IPRSCAN	IPR002486; IPR008160; IPR002486	Nematodecuticlecollagen,N-terminal; Collagentriplehelixrepeat	N	-147.2	-	No					-0.560467	0.0593426
212	AgB01_g213_t01	hypothetical_protein	Unknown product	Unknown			M	113	0	0		3	0	ExpAA=0.33 First60=0.33 PredHel=0 Topology=o	113	0						BL/SIG		13.042	8.93			0.871	4.998	0.01	mit						AgB01_g213_t01-IPRSCAN			N	Too short sequence	-	No					-0.946615	0.00753451
213	AgB01_g214_t01	hypothetical_protein	Unknown product	Unknown			M	117	0	0		6	0	ExpAA=0.45 First60=0.43 PredHel=0 Topology=o	117	0						CYT		13.146	5.12			0.836	4.159	0.008	nuc						AgB01_g214_t01-IPRSCAN			N	Too short sequence	-	No					-0.875441	0.0110916
214	AgB01_g215_t01	cbn-moma-1_protein	zona pellucida-like domain - signalP detected - 2 predicted membrane helices	Unknown / membrane			M	492	0	1		17	0	ExpAA=44.59 First60=21.43 PredHel=2 Topology=i7-29o415-437i	492	2	8.9	78.5	12.6		55	SIG	29-30	55.152	6.58	52.064	6.44	0.484	1.037	0.002	end		PF00100	Zona pellucida-like domain			AgB01_g215_t01-IPRSCAN	IPR001507	Zonapellucidadomain	N	-101.3	-	No					-0.943369	0.00766876
215	AgB01_g216_t01	cbn-moma-1_protein	MICOS complex - cristae formation - integral component of membrane - membrane - mitochondrial outer membrane - mitochondrion	Energy Metabolism	GO	2e-38	M	193	0	1		2	0	ExpAA=23.56 First60=0.00 PredHel=0 Topology=o	193	0						CYT		21.724	9.41			0.745	2.701	0.005	nuc		PF09769	Apolipoprotein O	PTHR14564	2.9e-40	AgB01_g216_t01-IPRSCAN	IPR033182; IPR019166	MICOScomplexsubunitMIC26/MIC27,animal; MICOScomplexsubunitMIC26/MIC27	N	Too short sequence	-	No					-0.98666	0.00605809
216	AgB01_g217_t02	Histone_acetyltransferase_MYST1	Histone acetyltransferase (MYST family)	Nuclear Regulation	KOG	0	C	559	0	1		17	0	ExpAA=0.00 First60=0.00 PredHel=0 Topology=o	559	0						CYT		64.695	6.7			0.578	1.478	0.003	nuc		PF01853; PF11717	MOZ/SAS family; RNA binding activity-knot of a chromodomain	PTHR10615:SF82	3.1e-151	AgB01_g217_t02-IPRSCAN	IPR016181; IPR037906; IPR016197; IPR002717; IPR025995; IPR036388	Acyl-CoAN-acyltransferase; HistoneacetyltransferaseKAT8; Chromo-likedomainsuperfamily; Histoneacetyltransferasedomain,MYST-type; RNAbindingactivity-knotofachromodomain; Wingedhelix-likeDNA-bindingdomainsuperfamily	N	-153.89	-	No					-0.955937	0.00716171
217	AgB01_g218_t01	disintegrin_and_metalloproteinase_domain-containing_protein_24	hemorrhagic metalloproteinase-disintegrin kaouthiagin - signalP detected - Conserved membrane protein Hemorrhagic - 2 predicted membrane helices	Uncharacterized /membrane / Hemorrhagic	NR	0	M	658	0	0		25	0	ExpAA=38.56 First60=1.68 PredHel=1 Topology=i319-341o	658	1	3.3	48.2	48.5		317	SIG	20-21	74.173	7.72	72.109	7.73	0.803	3.748	0.007	exc	EVARVKR|EE 0.543 *ProP*	PF01421	Reprolysin (M12B) family zinc metalloprotease	PTHR11905:SF162	1.8e-45	AgB01_g218_t01-IPRSCAN	IPR001590; IPR024079; IPR036436	PeptidaseM12B,ADAM/reprolysin; Metallopeptidase,catalyticdomainsuperfamily; Disintegrindomainsuperfamily	N	-56.51	-	No					-0.99859	0.00567663
218	AgB01_g219_t01	Transcription_factor_Adf-1	Transcription factor Adf-1	Transcription Factor	NR	0	M	272	0	0		3	0	ExpAA=1.05 First60=0.00 PredHel=0 Topology=o	272	0						CYT		30.227	5.52			0.673	1.937	0.004	nuc	TRWRTLR|DR 0.502 *ProP*	PF10545	Alcohol dehydrogenase transcription factor Myb/SANT-like	PTHR12243	3.5e-35	AgB01_g219_t01-IPRSCAN	IPR006578; IPR006578	MADFdomain	N	-213.28	-	No					-0.980805	0.00625451
219	AgB01_g220_t01	hypothetical_protein	Unknown product	Unknown			M	84	0	0		4	0	ExpAA=0.00 First60=0.00 PredHel=0 Topology=o	84	0						CYT		9.75	9.96			0.698	2.352	0.005	nuc						AgB01_g220_t01-IPRSCAN			N	Too short sequence	-	No					-0.956921	0.00712347
220	AgB01_g221_t03	DnaJ_subfamily_C_member_8,_partial	DNaJ domain (Prokaryotic heat shock protein) - nucleus	Post-translation Modification	GO	2e-97	M	244	0	1		1	0	ExpAA=0.00 First60=0.00 PredHel=0 Topology=o	244	0						CYT		28.525	9.47			0.652	1.785	0.004	nuc		PF00226	DnaJ domain	PTHR15606	5.1e-79	AgB01_g221_t03-IPRSCAN	IPR036869; IPR001623; IPR001623	ChaperoneJ-domainsuperfamily; DnaJdomain	N	-348.95	-	No					-0.96481	0.00682393
221	AgB01_g222_t01	hypothetical_protein	Unknown product - 2 predicted membrane helices	Unknown / membrane			M	68	0	0		0	0	ExpAA=22.11 First60=20.24 PredHel=1 Topology=i40-62o	68	1	32.4	8.8	58.8		6	BL/SIG		6.799	10.77			0.642	3.125	0.006	mit						AgB01_g222_t01-IPRSCAN			N	Too short sequence	-	No					-0.945279	0.00758949
222	AgB01_g223_t04	g_in_family_member_(glb-33)	integral component of plasma membrane - G-protein coupled receptor signaling pathway - G-protein coupled peptide receptor - integral component of - 7 predicted membrane helices	Signal Transduction / membrane	GO	0	M	599	0	2		17	0	ExpAA=139.55 First60=5.71 PredHel=6 Topology=o56-78i98-120o130-152i176-198o241-260i281-303o	599	6	21.5	67.6	10.9			CYT		69.061	8.95			0.642	1.805	0.004	end		PF00001	7 transmembrane receptor (rhodopsin family)	PTHR22751	2e-122	AgB01_g223_t04-IPRSCAN	IPR000276; IPR009050; IPR017452; IPR012292	Gprotein-coupledreceptor,rhodopsin-like; Globin-likesuperfamily; GPCR,rhodopsin-like,7TM; Globin/Protoglobin	N	7.75	36.81	GPCR					-0.966081	0.00677685
223	AgB01_g224_t01	hypothetical_protein	Unknown product - 4 predicted membrane helices	Unknown / membrane			S	109	0.917431	0	H(8.09)I(6.58)Y(6.83)X(135.1)	0	0.917431	ExpAA=68.93 First60=37.46 PredHel=3 Topology=i12-34o49-71i84-106o	109	3	60.6	16.5	22.9			CYT		13.355	7.4			0.91	6.066	0.012	mit						AgB01_g224_t01-IPRSCAN			N	Too short sequence	-	No					None	None
224	AgB01_g225_t02	immunodominant_antigen_ov33-3	Aspartyl protease inhibitor partial	Amino Acid Metabolism	NR	3e-50	F	259	0	0		8	0	ExpAA=21.85 First60=21.84 PredHel=1 Topology=i13-35o	259	1	8.5	86.5	5		224	CYT		30.056	9.58			0.77	3.279	0.007	nuc		PF06394; PF06394	Pepsin inhibitor-3-like repeated domain; Pepsin inhibitor-3-like repeated domain			AgB01_g225_t02-IPRSCAN	IPR038412; IPR010480; IPR010480	Pepsininhibitor-3domainsuperfamily; Pepsininhibitor-3-likerepeateddomain	N	-145.06	-	No					-0.969074	0.00666727
225	AgB01_g226_t06	Kinesin-like_protein_KIF11	Kinesin-like protein	Cytoskeletal	KOG	3e-89	M	1002	0	3		11	0	ExpAA=0.00 First60=0.00 PredHel=0 Topology=o	1002	0						CYT		112.608	5.45			0.246	0.467	0.001	nuc		PF00225	Kinesin motor domain	PTHR24115:SF105	1.7e-140	AgB01_g226_t06-IPRSCAN	IPR001752; IPR019821; IPR027417; IPR027640; IPR036961; IPR001752	Kinesinmotordomain; Kinesinmotordomain,conservedsite; P-loopcontainingnucleosidetriphosphatehydrolase; Kinesin-likeprotein; Kinesinmotordomainsuperfamily	N	-210.35	-	No					-0.999035	0.00566287
226	AgB01_g227_t01	Kinesin-like_protein_KIF11	Unknown product	Unknown			P	115	0	0		1	0	ExpAA=0.19 First60=0.19 PredHel=0 Topology=o	115	0						CYT		13.27	9.66			0.709	4.158	0.008	cyt						AgB01_g227_t01-IPRSCAN			N	Too short sequence	-	No					-0.954723	0.00720924
227	AgB01_g228_t02	Tau-tubulin_kinase_1,_partial	tau-tubulin kinase 1	Cytoskeletal	NR	0	M	288	0	2		6	0	ExpAA=0.22 First60=0.00 PredHel=0 Topology=o	288	0						CYT		33.069	5.37			0.832	3.003	0.006	nuc				PTHR11909:SF19	3.7e-27	AgB01_g228_t02-IPRSCAN	IPR000719; IPR011009	Proteinkinasedomain; Proteinkinase-likedomainsuperfamily	N	-137.88	-	No	-91.1	0.018	0.509737	protein kinase subdomain-containing protein	-0.966001	0.0067798
228	AgB01_g229_t01	Tau-tubulin_kinase_1,_partial	Unknown product	Unknown			M	94	0	0	H(3.41)	2	0	ExpAA=0.00 First60=0.00 PredHel=0 Topology=i	94	0						CYT		11.113	9.91			0.781	3.427	0.007	nuc						AgB01_g229_t01-IPRSCAN			N	Too short sequence	-	No					-0.897391	0.00984614
229	AgB01_g230_t04	hypothetical_protein	Unknown product	Unknown			M	151	0	0		7	0	ExpAA=0.04 First60=0.01 PredHel=0 Topology=o	151	0						CYT		16.281	4.45			0.559	1.217	0.002	cyt						AgB01_g230_t04-IPRSCAN			N	Too short sequence	-	No					-1.01895	0.00508014
230	AgB01_g231_t01	hypothetical_protein	Unknown product	Unknown			M	164	0	0		2	0	ExpAA=0.00 First60=0.00 PredHel=0 Topology=o	164	0						CYT		18.654	8.88			0.704	2.158	0.004	nuc	KRATKRR|SK 0.560 *ProP*					AgB01_g231_t01-IPRSCAN			N	Too short sequence	-	No					-0.929859	0.00825362
231	AgB01_g232_t01	hypothetical_protein	Unknown product	Unknown			M	72	0	0	W(3.73)	2	0	ExpAA=0.01 First60=0.01 PredHel=0 Topology=o	72	0						CYT		8.236	7.82			0.922	6.409	0.013	nuc						AgB01_g232_t01-IPRSCAN			N	Too short sequence	-	No					-1.00537	0.00547059
232	AgB01_g233_t05	Glutamine-dependent_NAD(+)_synthetase	Unknown product - signalP detected - 5 predicted membrane helices - GPI anchored	Unknown / membrane / GPI			M	227	0.881057	0	F(5.42)X(129.74)	8	0.881057	ExpAA=111.36 First60=26.18 PredHel=5 Topology=o15-37i57-79o99-121i141-163o173-195i	227	5	48.5	19.8	31.7			SIG	39-40	26.828	9.41	22.159	9.77	0.128	0.262	0.001	end						AgB01_g233_t05-IPRSCAN			Y	-13.45	-	No					-0.867508	0.011579
233	AgB01_g234_t01	Glutamine-dependent_NAD(+)_synthetase	Unknown product	Unknown			M	116	0	0		4	0	ExpAA=0.02 First60=0.00 PredHel=0 Topology=o	116	0						CYT		13.619	10.03			0.704	2.299	0.005	mit						AgB01_g234_t01-IPRSCAN			N	Too short sequence	-	No					-0.80612	0.0161382
234	AgB01_g235_t01	hypothetical_protein	Unknown product	Unknown			M	98	0	0	F(3.14)	2	0	ExpAA=5.55 First60=5.54 PredHel=0 Topology=o	98	0						CYT		11.403	9.2			0.941	6.813	0.014	mit						AgB01_g235_t01-IPRSCAN			N	Too short sequence	-	No					-0.840007	0.0134383
235	AgB01_g236_t01	hypothetical_protein	Unknown product	Unknown			M	120	0	0		8	0	ExpAA=2.54 First60=1.93 PredHel=0 Topology=o	120	0						CYT		13.7	7.57			0.652	1.875	0.004	mit						AgB01_g236_t01-IPRSCAN			N	Too short sequence	-	No					-0.866287	0.0116559
236	AgB01_g237_t03	hypothetical_protein	Unknown product	Unknown			M	120	0	0		8	0	ExpAA=2.54 First60=1.93 PredHel=0 Topology=o	120	0						CYT		13.703	7.57			0.652	1.875	0.004	cyt						AgB01_g237_t03-IPRSCAN			N	Too short sequence	-	No					-0.866287	0.0116559
237	AgB01_g238_t04	hypothetical_protein	Unknown product - 3 predicted membrane helices	Unknown / membrane			M	156	0	0		4	0	ExpAA=73.82 First60=14.20 PredHel=3 Topology=o56-78i91-113o133-155i	156	3	42.3	48.7	9			CYT		17.48	7.68			0.244	0.461	0.001	cyt						AgB01_g238_t04-IPRSCAN			N	Too short sequence	-	No					-0.865408	0.0117116
238	AgB01_g239_t01	hypothetical_protein	Unknown product	Unknown			M	207	0	0		4	0	ExpAA=0.24 First60=0.01 PredHel=0 Topology=o	207	0						CYT		24.305	10.46			0.816	3.656	0.007	nuc	MEGRGKR|GS 0.675 *ProP*					AgB01_g239_t01-IPRSCAN			N	-300.51	-	No					-0.934516	0.00804717
239	AgB01_g240_t04	hypothetical_protein	Unknown product	Unknown			M	448	0	1		2	0	ExpAA=0.00 First60=0.00 PredHel=0 Topology=o	448	0						CYT		51.175	6.28			0.599	1.39	0.003	nuc						AgB01_g240_t04-IPRSCAN			N	-207.44	-	No					-0.919201	0.00874601
240	AgB01_g241_t01	Proto-oncogene_serine/threonine-protein_kinase_pim-1	Serine/threonine-protein kinase pim-2	Signal Transduction	NR	0	M	399	0	2		12	0	ExpAA=0.01 First60=0.00 PredHel=0 Topology=o	399	0						CYT		44.284	8.53			0.571	1.359	0.003	mit		PF00069	Protein kinase domain	PTHR22984:SF9	1.1e-85	AgB01_g241_t01-IPRSCAN	IPR000719; IPR017348; IPR011009; IPR008271; IPR000719	Proteinkinasedomain; Serine/threonine-proteinkinasepim-1/2/3; Proteinkinase-likedomainsuperfamily; Serine/threonine-proteinkinase,activesite	N	-145.83	-	No	127.2	6.2e-35	0.66185	CAMK/PIM protein kinase	-0.971263	0.00658827
241	AgB01_g242_t02	wu:fc32f04_protein	Unknown product	Unknown			M	232	0	1	K(3.45)	2	0	ExpAA=19.97 First60=19.97 PredHel=1 Topology=o10-32i	232	1	9.5	4.3	86.2		200	CYT		25.882	5.2			0.535	1.383	0.003	nuc						AgB01_g242_t02-IPRSCAN			N	-364.71	-	No					-0.984438	0.00613189
242	AgB01_g243_t01	hypothetical_protein	Unknown product	Unknown			M	84	0	0	W(4.27)	1	0	ExpAA=6.69 First60=0.48 PredHel=0 Topology=o	84	0						CYT		10.33	10			0.709	2.148	0.004	cyt						AgB01_g243_t01-IPRSCAN			N	Too short sequence	-	No					-0.923736	0.00853301
243	AgB01_g244_t01	OV39_antigen	Unknown product	Unknown			M	66	0	0		0	0	ExpAA=0.00 First60=0.00 PredHel=0 Topology=o	66	0						CYT		7.424	6.07			0.879	5.018	0.01	nuc						AgB01_g244_t01-IPRSCAN			N	Too short sequence	-	No					-0.975805	0.00642725
244	AgB01_g245_t03	hypothetical_protein	Unknown product	Unknown			M	163	0	0		5	0	ExpAA=0.00 First60=0.00 PredHel=0 Topology=o	163	0						CYT		18.499	4.75			0.788	3.54	0.007	nuc						AgB01_g245_t03-IPRSCAN			N	Too short sequence	-	No					-0.971366	0.00658456
245	AgB01_g246_t02	40S_ribosomal_protein_S21,_partial	40s ribosomal protein s21	Protein Synthesis	NR	1e-39	M	84	0	1		3	0	ExpAA=0.00 First60=0.00 PredHel=0 Topology=o	84	0						CYT		9.285	4.93			0.885	5.242	0.01	nuc		PF01249	Ribosomal protein S21e	PTHR10442:SF0	1.3e-30	AgB01_g246_t02-IPRSCAN	IPR018279; IPR001931; IPR038579; IPR001931	RibosomalproteinS21e,conservedsite; RibosomalproteinS21e; RibosomalproteinS21esuperfamily	N	Too short sequence	-	No					-0.900208	0.00969668
246	AgB01_g247_t01	hypothetical_protein	Conserved secreted protein precursor	Secreted / Uncharacterized	CDD	2e-85	M	162	0	1		2	0	ExpAA=9.90 First60=9.90 PredHel=0 Topology=o	162	0						SIG	22-23	18.726	5.14	16.362	4.92	0.822	3.856	0.008	exc						AgB01_g247_t01-IPRSCAN			N	Too short sequence	-	No					-1.02106	0.0050219
247	AgB01_g248_t01	nanos-like_protein_2	nanos C2HC-type zinc finger 2 - positive regulation of nuclear-transcribed mRNA catabolic process - probable fragment	Transcription Machinery	GO	3e-11	V	797	0	1		22	0	ExpAA=0.02 First60=0.02 PredHel=0 Topology=o	797	0						BL	21-22	86.385	8.59	84.048	8.49	0.543	1.143	0.002	nuc		PF05741	Nanos RNA binding domain			AgB01_g248_t01-IPRSCAN	IPR024161; IPR038129	Zincfinger,nanos-type; Nanosdomainsuperfamily	N	-81.15	-	No					-0.906986	0.0093462
248	AgB01_g249_t01	hypothetical_protein	Unknown product	Unknown			M	97	0	0	W(3.7)	4	0	ExpAA=0.00 First60=0.00 PredHel=0 Topology=i	97	0						CYT		11.419	9.83			0.853	4.407	0.009	mit						AgB01_g249_t01-IPRSCAN			N	Too short sequence	-	No					-0.928176	0.00832947
249	AgB01_g250_t01	hypothetical_protein	Unknown product	Unknown			C	101	0	0		5	0	ExpAA=25.13 First60=8.26 PredHel=1 Topology=o55-77i	101	1	21.8	54.5	23.8		24	BL/SIG		11.905	10.08			0.501	1.531	0.003	end						AgB01_g250_t01-IPRSCAN			N	Too short sequence	-	No					-0.899104	0.00975499
250	AgB01_g251_t03	Tubulin_beta-4_chain,_partial	Tubulin beta chain	Cytoskeletal	NR	0	M	442	0	2		8	0	ExpAA=0.01 First60=0.00 PredHel=0 Topology=o	442	0						CYT		49.524	4.95			0.473	4.273	0.009	cyt		PF00091; PF03953	Tubulin/FtsZ family, GTPase domain; Tubulin C-terminal domain	PTHR11588	0	AgB01_g251_t03-IPRSCAN	IPR023123; IPR000217; IPR003008; IPR036525; IPR018316; IPR008280; IPR037103; IPR002453; IPR017975; IPR013838	Tubulin,C-terminal; Tubulin; Tubulin/FtsZ,GTPasedomain; Tubulin/FtsZ,GTPasedomainsuperfamily; Tubulin/FtsZ,2-layersandwichdomain; Tubulin/FtsZ,C-terminal; Tubulin/FtsZ,C-terminaldomainsuperfamily; Betatubulin; Tubulin,conservedsite; Betatubulin,autoregulationbindingsite	N	-158.28	-	No					-1.00615	0.00544722
251	AgB01_g252_t02	Tubulin_beta-4_chain,_partial	Tubulin beta-4 chain	Cytoskeletal	NR	0	F	452	0	2		10	0	ExpAA=0.01 First60=0.00 PredHel=0 Topology=o	452	0						CYT		50.989	4.85			0.583	1.281	0.003	cyt		PF00091; PF03953	Tubulin/FtsZ family, GTPase domain; Tubulin C-terminal domain	PTHR11588:SF256	0	AgB01_g252_t02-IPRSCAN	IPR003008; IPR036525; IPR002453; IPR018316; IPR000217; IPR037103; IPR008280; IPR017975; IPR023123; IPR003008	Tubulin/FtsZ,GTPasedomain; Tubulin/FtsZ,GTPasedomainsuperfamily; Betatubulin; Tubulin/FtsZ,2-layersandwichdomain; Tubulin; Tubulin/FtsZ,C-terminaldomainsuperfamily; Tubulin/FtsZ,C-terminal; Tubulin,conservedsite; Tubulin,C-terminal	N	-156.16	-	No					-0.999273	0.00565554
252	AgB01_g253_t01	Rab-like_protein_5	Unknown product	Unknown			Q	102	0	0		5	0	ExpAA=2.82 First60=2.82 PredHel=0 Topology=o	102	0						CYT		11.504	10.57			0.857	4.556	0.009	nuc						AgB01_g253_t01-IPRSCAN			N	Too short sequence	-	No					-0.941254	0.00775756
253	AgB01_g254_t01	hypothetical_protein	hypothetical secreted protein precursor	Secreted / Unknown			M	852	0	1		44	0	ExpAA=0.23 First60=0.03 PredHel=0 Topology=o	852	0						SIG	20-21	96.105	7.04	94.121	6.89	0.516	1.102	0.002	cyt						AgB01_g254_t01-IPRSCAN			N	-108.96	-	No					-0.955892	0.00716349
254	AgB01_g255_t01	hypothetical_protein	Unknown product	Unknown			M	162	0	0	P(3.87)	3	0	ExpAA=22.90 First60=0.00 PredHel=1 Topology=o133-155i	162	1	13.6	82.1	4.3		7	CYT		17.043	5.33			0.806	3.766	0.008	cyt						AgB01_g255_t01-IPRSCAN			N	Too short sequence	-	No					-1.00029	0.00562422
255	AgB01_g256_t04	multidrug_resistance_protein_pgp-1	Multidrug resistance-associated protein/mitoxantrone resistance protein ABC superfamily - probable fragment - 9 predicted membrane helices	Detoxification / membrane	KOG	2e-95	M	1089	0	0		19	0	ExpAA=184.15 First60=22.60 PredHel=8 Topology=o15-37i94-116o136-158i566-588o648-670i672-691o758-780i793-815o	1089	8	15.9	40	44.1			CYT		119.022	6.3			0.75	2.758	0.006	end		PF00005; PF00005; PF00664; PF00664	ABC transporter; ABC transporter; ABC transporter transmembrane region; ABC transporter transmembrane region	PTHR24221:SF200	0	AgB01_g256_t04-IPRSCAN	IPR036640; IPR017871; IPR027417; IPR011527; IPR003439; IPR003593; IPR011527	ABCtransportertype1,transmembranedomainsuperfamily; ABCtransporter,conservedsite; P-loopcontainingnucleosidetriphosphatehydrolase; ABCtransportertype1,transmembranedomain; ABCtransporter-like; AAA+ATPasedomain	N	-143.62	-	No					-1.01926	0.00507132
256	AgB01_g257_t05	5'-AMP-activated_protein_kinase_subunit_gamma-2	5'-AMP-activated protein kinase subunit gamma-2	Signal Transduction	NR	0	M	447	0	2		7	0	ExpAA=0.01 First60=0.00 PredHel=0 Topology=o	447	0						CYT		50.936	8.55			0.527	1.135	0.002	nuc	RQCRRKR|KL 0.585 *ProP*	PF00571; PF00571; PF00571	CBS domain; CBS domain; CBS domain	PTHR13780	2.6e-162	AgB01_g257_t05-IPRSCAN	IPR000644; IPR000644	CBSdomain	N	-129.63	-	No					-0.941069	0.00776537
257	AgB01_g258_t06	ribonuclease_p_protein_1-like_protein	ribonuclease p protein 1-like protein	Nuclear Metabolism	NR	0	M	413	0	0		3	0	ExpAA=0.00 First60=0.00 PredHel=0 Topology=o	413	0						CYT		49.052	9.46			0.693	2.383	0.005	mit	TQHRARR|DA 0.717 *ProP* ; YISRYGR|EV 0.566 *ProP*			PTHR13563	8.7e-92	AgB01_g258_t06-IPRSCAN	IPR007356; IPR028564; IPR038459	tRNA(guanine-N1-)-methyltransferase,eukaryotic; tRNAmethyltransferaseTRM10-typedomain; tRNAmethyltransferaseTRM10-typedomainsuperfamily	N	-198.92	-	No					-0.990388	0.00593623
258	AgB01_g259_t01	Reactive_oxygen_species_modulator_1	Unknown product	Unknown			M	89	0	1		3	0	ExpAA=0.14 First60=0.14 PredHel=0 Topology=o	89	0						CYT		10.261	9.85			0.952	7.012	0.014	mit	VNGPQKR|SA 0.556 *ProP*					AgB01_g259_t01-IPRSCAN			N	Too short sequence	-	No					-0.944224	0.00763317
259	AgB01_g260_t01	hypothetical_protein	Unknown product	Unknown			M	143	0	0		4	0	ExpAA=3.01 First60=0.04 PredHel=0 Topology=i	143	0						CYT		16.438	11.64			0.767	2.974	0.006	nuc						AgB01_g260_t01-IPRSCAN			N	Too short sequence	-	No					-0.874118	0.0111714
260	AgB01_g261_t06	hypothetical_protein	Unknown product - 2 predicted membrane helices	Unknown / membrane			M	206	0	1	C(3.07)	15	0	ExpAA=39.12 First60=15.04 PredHel=2 Topology=i13-30o83-105i	206	2	18.9	25.7	55.3		101	BL	27-28	23.787	8.72	20.806	8.43	0.407	0.773	0.002	end						AgB01_g261_t06-IPRSCAN			N	-182.97	-	No					-0.974559	0.006471
261	AgB01_g262_t06	hypothetical_protein	Unknown product	Unknown			M	373	0	2		13	0	ExpAA=0.14 First60=0.00 PredHel=0 Topology=o	373	0						CYT		42.306	5.42			0.552	1.188	0.002	nuc						AgB01_g262_t06-IPRSCAN			N	-125.52	-	No					-0.979287	0.00630646
262	AgB01_g263_t03	hypothetical_protein	Unknown product	Unknown			S	246	0	0		8	0	ExpAA=23.49 First60=13.92 PredHel=1 Topology=o48-70i	246	1	8.9	19.5	71.5		176	CYT		27.958	6.09			0.117	0.254	0.001	nuc						AgB01_g263_t03-IPRSCAN			N	-214.44	-	No					-0.978201	0.00634389
263	AgB01_g264_t01	hypothetical_protein	Unknown product	Unknown			M	197	0	2		4	0	ExpAA=23.22 First60=23.22 PredHel=1 Topology=o5-27i	197	1	11.2	2.5	86.3		170	ANC		22.511	9.51	19.922	9.54	0.734	2.727	0.005	nuc	KSNRFRR|PR 0.541 *ProP* ; NRFRRPR|SI 0.658 *ProP* ; LHLRNKR|SA 0.757 *ProP*					AgB01_g264_t01-IPRSCAN			N	Too short sequence	-	No					-0.945883	0.00756459
264	AgB01_g265_t03	ras-specific_guanine_nucleotide-releasing_factor_1	Ral GEF with PH domain and SH3 binding motif 1 - regulation of Ral protein signal transduction - membrane - Ral guanyl-nucleotide exchange factor -	Signal Transduction	GO	6e-76	M	587	0	1		12	0	ExpAA=0.28 First60=0.00 PredHel=0 Topology=o	587	0						CYT		66.831	9.3			0.383	0.714	0.001	nuc	LVSRHDR|SI 0.668 *ProP* ; SAWRVIR|SG 0.504 *ProP* ; SSGRIYR|FL 0.612 *ProP*	PF00617	RasGEF domain	PTHR23113:SF167	3.3e-79	AgB01_g265_t03-IPRSCAN	IPR001895; IPR011993; IPR036964; IPR023578	Rasguanine-nucleotideexchangefactorscatalyticdomain; PH-likedomainsuperfamily; Rasguanine-nucleotideexchangefactorcatalyticdomainsuperfamily; Rasguaninenucleotideexchangefactordomainsuperfamily	N	-149.63	-	No					-0.946208	0.00755121
265	AgB01_g266_t02	ras-specific_guanine_nucleotide-releasing_factor_1	hypothetical secreted protein precursor	Secreted / Unknown			C	76	0	0		4	0	ExpAA=5.80 First60=5.80 PredHel=0 Topology=o	76	0						SIG	15-16	8.773	10.95	7.112	11.57	0.914	6.165	0.012	exc						AgB01_g266_t02-IPRSCAN			N	Too short sequence	-	No					-1.02349	0.00495581
266	AgB01_g267_t03	cathepsin_b-like_cysteine_proteinase_6	Unknown product	Unknown			M	59	0	0		1	0	ExpAA=0.01 First60=0.01 PredHel=0 Topology=o	59	0						CYT		6.885	10.82			0.543	1.478	0.003	nuc						AgB01_g267_t03-IPRSCAN			N	Too short sequence	-	No					-0.86631	0.0116545
267	AgB01_g268_t02	cathepsin_B-like_cysteine_proteinase	Unknown product	Unknown			N	50	0	0	Y(4.06)	2	0	ExpAA=0.05 First60=0.05 PredHel=0 Topology=o	50	0						CYT		5.827	9.64			0.828	4.087	0.008	nuc						AgB01_g268_t02-IPRSCAN			N	Too short sequence	-	No					-0.996672	0.00573631
268	AgB01_g269_t01	cathepsin_B-like_cysteine_proteinase	cathepsin b-like cysteine proteinase 6 - probable fragment	Post-translational Modifications / protease	NR	0	H	303	0	1		19	0	ExpAA=2.70 First60=2.70 PredHel=0 Topology=o	303	0						CYT		34.175	8.75			0.332	0.62	0.001	nuc		PF00112	Papain family cysteine protease	PTHR12411:SF540	3.7e-88	AgB01_g269_t01-IPRSCAN	IPR000668; IPR000169; IPR013128	PeptidaseC1A,papainC-terminal; Cysteinepeptidase,cysteineactivesite; PeptidaseC1A	N	-141.02	-	No					-0.173363	0.345121
269	AgB01_g270_t01	cathepsin_B-like_cysteine_proteinase	Unknown product	Unknown			M	51	0	0	I(3.43)M(3.84)	2	0	ExpAA=22.00 First60=22.00 PredHel=1 Topology=o4-26i	51	1	43.1	7.8	49		25	CYT		6.03	6.8			0.135	0.278	0.001	cyt						AgB01_g270_t01-IPRSCAN			N	Too short sequence	-	No					-0.616215	0.0444065
270	AgB01_g271_t02	Glutathione_S-transferase	glutathione s-transferase	Detoxification	NR	0	M	210	0	0		4	0	ExpAA=0.08 First60=0.00 PredHel=0 Topology=o	210	0						CYT		24.992	6.53			0.499	1.036	0.002	nuc		PF14497; PF02798	Glutathione S-transferase, C-terminal domain; Glutathione S-transferase, N-terminal domain	PTHR11571:SF141	2.8e-64	AgB01_g271_t02-IPRSCAN	IPR003082; IPR004046; IPR036282; IPR004045; IPR010987; IPR036249; IPR004045	GlutathioneS-transferase,Piclass; GlutathioneS-transferase,C-terminal; GlutathioneS-transferase,C-terminaldomainsuperfamily; GlutathioneS-transferase,N-terminal; GlutathioneS-transferase,C-terminal-like; Thioredoxin-likesuperfamily	N	-233.76	-	No					-0.737812	0.0233001
271	AgB01_g272_t02	glutathione_s-transferase_2	glutathione s-transferase 2	Detoxification	NR	0	M	209	0	1		2	0	ExpAA=0.01 First60=0.00 PredHel=0 Topology=o	209	0						CYT		24.187	6.3			0.327	0.605	0.001	cyt		PF14497; PF02798	Glutathione S-transferase, C-terminal domain; Glutathione S-transferase, N-terminal domain	PTHR11571:SF141	9.2e-72	AgB01_g272_t02-IPRSCAN	IPR004046; IPR004045; IPR036282; IPR010987; IPR036249; IPR003082; IPR003082	GlutathioneS-transferase,C-terminal; GlutathioneS-transferase,N-terminal; GlutathioneS-transferase,C-terminaldomainsuperfamily; GlutathioneS-transferase,C-terminal-like; Thioredoxin-likesuperfamily; GlutathioneS-transferase,Piclass	N	-259.29	-	No					-0.0882184	0.456693
272	AgB01_g273_t03	wu:fc32f04_protein	Unknown product	Unknown			M	373	0	1	K(3.55)	1	0	ExpAA=21.33 First60=21.33 PredHel=1 Topology=o10-32i	373	1	5.9	2.7	91.4		341	BL	34-35	42.261	8.58	38.353	8.95	0.454	1.645	0.003	nuc	NDGRYKR|V- 0.571 *ProP*					AgB01_g273_t03-IPRSCAN			N	-281.63	-	No					-0.888495	0.0103333
273	AgB01_g274_t01	MBT_domain-containing_protein_1	mbt domain containing 1 - zinc ion binding - regulation of transcription - probable fragment	Transcription Machinery	GO	1e-37	V	353	0	1		8	0	ExpAA=2.30 First60=0.16 PredHel=0 Topology=o	353	0						CYT		40.687	4.98			0.306	0.569	0.001	cyt		PF02820; PF02820; PF02820	mbt repeat; mbt repeat; mbt repeat	PTHR12247	4.1e-47	AgB01_g274_t01-IPRSCAN	IPR004092; IPR004092	Mbtrepeat	N	-137.93	-	No					-0.979523	0.00629835
274	AgB01_g275_t01	MBT_domain-containing_protein_1	Unknown product	Unknown			M	114	0	0		3	0	ExpAA=0.00 First60=0.00 PredHel=0 Topology=o	114	0						CYT		13.175	4.9			0.508	1.079	0.002	mit						AgB01_g275_t01-IPRSCAN			N	Too short sequence	-	No					-1.02018	0.00504603
275	AgB01_g276_t01	hypothetical_protein	Saposin - signalP detected	Lipid Metabolism	SMART	5e-11	M	146	0	0		7	0	ExpAA=22.57 First60=22.56 PredHel=1 Topology=i7-29o	146	1	15.1	80.1	4.8		117	SIG	35-36	15.978	5.55	12.21	5.55	0.933	6.454	0.013	end		PF03489	Saposin-like type B, region 2	PTHR11480	3e-16	AgB01_g276_t01-IPRSCAN	IPR008138; IPR008139; IPR011001	SaposinBtype,region2; SaposinBtypedomain; Saposin-like	N	Too short sequence	-	No					-1.01874	0.00508583
276	AgB01_g277_t01	hypothetical_protein	Unknown product - 2 predicted membrane helices	Unknown / membrane			M	641	0	0		6	0	ExpAA=26.35 First60=0.00 PredHel=1 Topology=i444-466o	641	1	3.4	27.3	69.3		175	CYT		70.747	5.57			0.567	1.502	0.003	nuc						AgB01_g277_t01-IPRSCAN			N	-92.07	-	No					-0.990187	0.00594273
277	AgB01_g278_t01	hypothetical_protein	Unknown product - 2 predicted membrane helices - GPI anchored	Unknown / membrane / GPI			M	64	0	0		0	0	ExpAA=22.71 First60=22.71 PredHel=1 Topology=i35-57o	64	1	34.4	10.9	54.7		7	ANC		7.096	5.64	1.17	4.21	0.511	1.431	0.003	mit						AgB01_g278_t01-IPRSCAN			Y	Too short sequence	-	No					-1.00207	0.00556998
278	AgB01_g279_t01	hypothetical_protein	Unknown product	Unknown			M	149	0	1		2	0	ExpAA=22.52 First60=0.00 PredHel=1 Topology=o125-147i	149	1	14.8	83.9	1.3	1	2	BL	144-145	16.479	6.1	0.656	5.52	0.308	0.7	0.001	nuc						AgB01_g279_t01-IPRSCAN			N	Too short sequence	-	No					-0.999082	0.00566142
279	AgB01_g280_t01	hypothetical_protein	Unknown product	Unknown			M	149	0	1		2	0	ExpAA=22.52 First60=0.00 PredHel=1 Topology=o125-147i	149	1	14.8	83.9	1.3	1	2	BL	144-145	16.476	6.1	0.656	5.52	0.206	0.406	0.001	nuc						AgB01_g280_t01-IPRSCAN			N	Too short sequence	-	No					-0.997256	0.00571807
280	AgB01_g281_t03	Acyl-CoA-binding_protein_3	Acyl-CoA-binding -like protein 3 - probable fragment	Lipid Metabolism	NR	3e-46	M	149	0	0		3	0	ExpAA=0.01 First60=0.00 PredHel=0 Topology=o	149	0						CYT		16.845	5.01			0.501	1.035	0.002	cyt		PF00887	Acyl CoA binding protein	PTHR23310	1.1e-37	AgB01_g281_t03-IPRSCAN	IPR000582; IPR014352; IPR035984; IPR022408; IPR000582	Acyl-CoA-bindingprotein,ACBP; FERM/acyl-CoA-bindingproteinsuperfamily; Acyl-CoAbindingproteinsuperfamily; Acyl-CoA-bindingprotein,ACBP,conservedsite	N	Too short sequence	-	No					-0.980635	0.00626031
281	AgB01_g282_t02	hypothetical_protein	Unknown product	Unknown			M	87	0	0		4	0	ExpAA=6.38 First60=1.49 PredHel=0 Topology=o	87	0						CYT		10.187	9.38			0.902	5.824	0.012	nuc						AgB01_g282_t02-IPRSCAN			N	Too short sequence	-	No					-1.01967	0.00506014
282	AgB01_g283_t06	Leucine_aminopeptidase_1	leucine aminopeptidase 1 - probable fragment	Amino Acid Metabolism	NR	0	M	281	0.355872	0	X(52.41)	6	0.355872	ExpAA=0.42 First60=0.05 PredHel=0 Topology=o	281	0						CYT		29.748	6.04			0.727	2.391	0.005	mit		PF00883	Cytosol aminopeptidase family, catalytic domain	PTHR11963	5.4e-134	AgB01_g283_t06-IPRSCAN	IPR011356; IPR000819; IPR000819	PeptidaseM17,leucineaminopeptidase/peptidaseB; PeptidaseM17,leucylaminopeptidase,C-terminal	N	-127.71	-	No					-0.975739	0.00642953
283	AgB01_g284_t01	Leucine_aminopeptidase_1	Unknown product	Unknown			M	177	0	0		4	0	ExpAA=0.07 First60=0.00 PredHel=0 Topology=o	177	0						CYT		19.198	9.59			0.372	0.723	0.001	mit				PTHR11963	3.5e-16	AgB01_g284_t01-IPRSCAN	IPR011356	PeptidaseM17,leucineaminopeptidase/peptidaseB	N	Too short sequence	-	No					-0.882577	0.0106705
284	AgB01_g285_t03	Succinyl-CoA_ligase_ADP-forming_subunit_beta,_partial	GTP-specific succinyl-CoA synthetase beta subunit	Energy Metabolism	KOG	0	M	436	0	1		8	0	ExpAA=0.09 First60=0.00 PredHel=0 Topology=o	436	0						CYT		47.749	5.82			0.483	0.983	0.002	mit		PF00549; PF08442	CoA-ligase; ATP-grasp domain	PTHR11815:SF1	8.3e-187	AgB01_g285_t03-IPRSCAN	IPR005811; IPR005809; IPR013815; IPR016102; IPR017866; IPR013650; IPR034723; IPR005809	ATP-citratelyase/succinyl-CoAligase; Succinate--CoAsynthetase,betasubunit; ATP-graspfold,subdomain1; Succinyl-CoAsynthetase-like; Succinyl-CoAsynthetase,betasubunit,conservedsite; ATP-graspfold,succinyl-CoAsynthetase-type; Succinate--CoAligase[ADP-forming]subunitbeta,mitochondrial	N	-182.04	-	No					-0.953895	0.00724178
285	AgB01_g286_t02	cholinesterase	Unknown product	Unknown			M	59	0	0	W(3.04)	2	0	ExpAA=23.18 First60=23.18 PredHel=1 Topology=o25-47i	59	1	37.3	42.4	20.3		12	ANC		6.797	6.06	2.161	9.19	0.641	2.002	0.004	nuc						AgB01_g286_t02-IPRSCAN			N	Too short sequence	-	No					-1.04168	0.00448726
286	AgB01_g287_t01	Long-chain-fatty-acid--CoA_ligase_4	Unknown product	Unknown			M	69	0	0	H(3.49)	2	0	ExpAA=0.07 First60=0.05 PredHel=0 Topology=i	69	0						CYT		8.338	10.38			0.773	2.887	0.006	mit						AgB01_g287_t01-IPRSCAN			N	Too short sequence	-	No					-0.997377	0.0057143
287	AgB01_g288_t01	cholinesterase	Unknown product	Unknown			M	97	0	0		0	0	ExpAA=0.06 First60=0.00 PredHel=0 Topology=o	97	0						CYT		11.507	9.15			0.874	4.981	0.01	nuc		PF00135	Carboxylesterase family			AgB01_g288_t01-IPRSCAN	IPR029058; IPR002018	Alpha/Betahydrolasefold; Carboxylesterase,typeB	N	Too short sequence	-	No					-0.92013	0.00870194
288	AgB01_g289_t01	Cholinesterase	Acetylcholinesterase/Butyrylcholinesterase - probable fragment	Signal Transduction	KOG	2e-20	A	163	0	1		6	0	ExpAA=5.36 First60=4.00 PredHel=0 Topology=o	163	0						BL	29-30	18.694	8.26	15.32	6.77	0.764	3.044	0.006	mit		PF00135	Carboxylesterase family	PTHR11559:SF348	1.7e-29	AgB01_g289_t01-IPRSCAN	IPR002018; IPR029058; IPR029058	Carboxylesterase,typeB; Alpha/Betahydrolasefold	N	Too short sequence	-	No					-0.959276	0.00703271
289	AgB01_g290_t07	liver_carboxylesterase_2	Unknown product	Unknown			M	281	0	0		8	0	ExpAA=22.40 First60=0.00 PredHel=1 Topology=o240-262i	281	1	7.8	85.4	6.8		19	CYT		31.311	6.19			0.223	0.445	0.001	nuc						AgB01_g290_t07-IPRSCAN	IPR036116; IPR013783	FibronectintypeIIIsuperfamily; Immunoglobulin-likefold	N	-114.17	-	No					-0.991601	0.00589709
290	AgB01_g291_t02	hypothetical_protein	Unknown product	Unknown			M	164	0	0		1	0	ExpAA=0.04 First60=0.00 PredHel=0 Topology=o	164	0						CYT		18.941	9.14			0.519	1.078	0.002	nuc						AgB01_g291_t02-IPRSCAN			N	Too short sequence	-	No					-0.929406	0.00827396
291	AgB01_g292_t03	putative_palmitoyltransferase_zdhhc24	palmitoyltransferase zdhhc24 - 4 predicted membrane helices	Lipid Metabolism / membrane	NR	0	M	356	0	0		12	0	ExpAA=104.58 First60=0.59 PredHel=4 Topology=i88-110o120-140i207-229o259-281i	356	4	24.2	11.2	64.6			CYT		40.3	8.71			0.197	0.463	0.001	end		PF01529	DHHC palmitoyltransferase	PTHR22883:SF226	1.8e-85	AgB01_g292_t03-IPRSCAN	IPR001594	Palmitoyltransferase,DHHCdomain	N	-32.02	-	No					-1.0034	0.00552965
292	AgB01_g293_t01	Pyruvate_dehydrogenase_phosphatase_regulatory_subunit	Unknown product	Unknown			S	162	0	1		3	0	ExpAA=0.26 First60=0.00 PredHel=0 Topology=o	162	0						CYT		18.673	6.29			0.4	0.751	0.002	cyt		PF08669	Glycine cleavage T-protein C-terminal barrel domain	PTHR43757:SF3	1.3e-14	AgB01_g293_t01-IPRSCAN	IPR027266; IPR013977; IPR029043	GTP-bindingproteinTrmE/GlycinecleavagesystemTprotein,domain1; GlycinecleavageT-protein,C-terminalbarreldomain; GlycinecleavageT-protein/YgfZ,C-terminal	N	Too short sequence	-	No					-0.928639	0.00830854
293	AgB01_g294_t01	homocysteine_s-methyltransferase_3	Unknown product - GPI anchored	Unknown / GPI			M	57	0	0	W(3.14)	1	0	ExpAA=0.39 First60=0.39 PredHel=0 Topology=o	57	0						BL	19-20	6.775	10.46	4.543	10.23	0.83	4.071	0.008	cyt						AgB01_g294_t01-IPRSCAN			Y	Too short sequence	-	No					-1.03591	0.00463097
294	AgB01_g295_t02	liver_carboxylesterase_2	Unknown product	Unknown			M	389	0	0		9	0	ExpAA=22.64 First60=0.00 PredHel=1 Topology=o346-368i	389	1	5.7	88.9	5.4		21	CYT		44.257	8.29			0.419	0.828	0.002	nuc						AgB01_g295_t02-IPRSCAN	IPR036116	FibronectintypeIIIsuperfamily	N	-97.18	-	No					-0.953354	0.00726313
295	AgB01_g296_t07	Sulfhydryl_oxidase_1	FAD-dependent sulfhydryl oxidase/quiescin - signalP detected	Nuclear Regulation	KOG	0	M	546	0	1		10	0	ExpAA=1.75 First60=0.94 PredHel=0 Topology=o	546	0						SIG	21-22	62.472	6.11	60.244	6.06	0.606	1.436	0.003	cyt		PF00085; PF04777	Thioredoxin; Erv1 / Alr family	PTHR22897	1.4e-157	AgB01_g296_t07-IPRSCAN	IPR013766; IPR036774; IPR036249; IPR017905; IPR036774	Thioredoxindomain; ERV/ALRsulfhydryloxidasedomainsuperfamily; Thioredoxin-likesuperfamily; ERV/ALRsulfhydryloxidasedomain	N	-154.63	-	No					-0.960041	0.00700347
296	AgB01_g297_t04	DNA_repair_protein_RAD2	DNA repair protein RAD2	Nuclear Regulation	NR	0	M	460	0	2		10	0	ExpAA=0.00 First60=0.00 PredHel=0 Topology=o	460	0						CYT		52.241	5.28			0.669	3.885	0.008	nuc		PF00867	XPG I-region	PTHR16171	5.3e-71	AgB01_g297_t04-IPRSCAN	IPR036279; IPR029060; IPR006084; IPR008918; IPR006086; IPR006086	5'-3'exonuclease,C-terminaldomainsuperfamily; PIN-likedomainsuperfamily; XPG/Rad2endonuclease; Helix-hairpin-helixmotif,class2; XPG-Idomain	N	-150.23	-	No					-0.94529	0.00758902
297	AgB01_g298_t01	E3_ubiquitin-protein_ligase_TRIP12	cytoplasm - nucleus - ubiquitin-protein transferase - probable fragment	Proteasome	GO	0	M	1115	0	0		12	0	ExpAA=0.11 First60=0.00 PredHel=0 Topology=o	1115	0						CYT		119.309	9.43			0.239	0.457	0.001	nuc	VRGRKGR|GK 0.540 *ProP* ; SGGRHRR|KA 0.697 *ProP*	PF02825	WWE domain	PTHR11254	3.9e-47	AgB01_g298_t01-IPRSCAN	IPR016024; IPR018123; IPR011989; IPR004170; IPR037197; IPR004170	Armadillo-typefold; WWEdomain,subgroup; Armadillo-likehelical; WWEdomain; WWEdomainsuperfamily	N	-62.03	-	No					-0.898375	0.00979368
298	AgB01_g299_t01	ATP-dependent_RNA_helicase_DDX3X	Unknown product	Unknown			M	199	0	1		1	0	ExpAA=0.18 First60=0.18 PredHel=0 Topology=o	199	0						CYT		21.63	4.68			0.804	0.931	0.002	nuc						AgB01_g299_t01-IPRSCAN			N	Too short sequence	-	No					-0.951622	0.00733195
299	AgB01_g300_t01	ATP-dependent_RNA_helicase_DDX3X	DEAD-box protein abstrakt - probable fragment	Transcription Machinery	KOG	1e-81	G	481	0	1		3	0	ExpAA=0.06 First60=0.00 PredHel=0 Topology=o	481	0						CYT		54.48	6.07			0.414	0.79	0.002	cyt		PF00271; PF00270	Helicase conserved C-terminal domain; DEAD/DEAH box helicase	PTHR24031	6.3e-180	AgB01_g300_t01-IPRSCAN	IPR001650; IPR014001; IPR014014; IPR027417; IPR011545; IPR000629; IPR001650	Helicase,C-terminal; Helicasesuperfamily1/2,ATP-bindingdomain; RNAhelicase,DEAD-boxtype,Qmotif; P-loopcontainingnucleosidetriphosphatehydrolase; DEAD/DEAHboxhelicasedomain; ATP-dependentRNAhelicaseDEAD-box,conservedsite	N	-155.13	-	No					-1.04074	0.00451042
300	AgB01_g301_t01	Motile_sperm_domain-containing_protein_1	perinuclear region of cytoplasm - positive regulation of transcription by RNA polymerase II - integral component of - GPI anchored	Transcription Machinery / GPI	GO	4e-41	M	218	0	0		5	0	ExpAA=39.96 First60=3.47 PredHel=0 Topology=o	218	0						CYT		23.873	8.81			0.773	2.756	0.006	end		PF00635	MSP (Major sperm protein) domain	PTHR34441	2.2e-63	AgB01_g301_t01-IPRSCAN	IPR008962; IPR013783; IPR000535	PapD-likesuperfamily; Immunoglobulin-likefold; Majorspermprotein(MSP)domain	Y	-150.51	-	No					-0.920298	0.008694
301	AgB01_g302_t01	trehalase	Neutral trehalase	Carbohydrate Metabolism	KOG	0	M	532	0	2		5	0	ExpAA=3.16 First60=0.00 PredHel=0 Topology=o	532	0						CYT		62.108	6.89			0.356	0.672	0.001	cyt		PF01204; PF01204	Trehalase; Trehalase	PTHR23403	3.6e-185	AgB01_g302_t01-IPRSCAN	IPR001661; IPR012341; IPR008928; IPR018232; IPR001661	Glycosidehydrolase,family37; Six-hairpinglycosidase-likesuperfamily; Six-hairpinglycosidasesuperfamily; Glycosidehydrolase,family37,conservedsite	N	-146.8	-	No					-0.97521	0.00644811
302	AgB01_g303_t03	Trehalase	Neutral trehalase - probable fragment	Carbohydrate Metabolism	KOG	6e-49	M	260	0	0		3	0	ExpAA=0.01 First60=0.00 PredHel=0 Topology=o	260	0						CYT		29.684	8.67			0.594	1.433	0.003	cyt		PF01204	Trehalase	PTHR23403:SF22	4.5e-76	AgB01_g303_t03-IPRSCAN	IPR012341; IPR008928; IPR001661; IPR001661	Six-hairpinglycosidase-likesuperfamily; Six-hairpinglycosidasesuperfamily; Glycosidehydrolase,family37	N	-174.59	-	No					-0.991488	0.00590072
303	AgB01_g304_t02	Dual_specificity_protein_phosphatase_18	Dual specificity protein phosphatase 21	Signal Transduction	NR	1e-94	M	227	0	0		10	0	ExpAA=0.08 First60=0.02 PredHel=0 Topology=o	227	0						CYT		25.571	6.98			0.883	5.444	0.011	nuc		PF00782	Dual specificity phosphatase, catalytic domain	PTHR10159:SF492	1.7e-83	AgB01_g304_t02-IPRSCAN	IPR020422; IPR029021; IPR000387; IPR000340; IPR016130; IPR024950	Dualspecificityproteinphosphatasedomain; Protein-tyrosinephosphatase-like; Tyrosinespecificproteinphosphatasesdomain; Dualspecificityphosphatase,catalyticdomain; Protein-tyrosinephosphatase,activesite; Dualspecificityphosphatase	N	-205.28	-	No					-0.907056	0.00934269
304	AgB01_g305_t03	neuronal_calcium_sensor_1	Ca2+ sensor (EF-Hand superfamily)	Signal Transduction	KOG	4e-68	M	191	0	2		1	0	ExpAA=0.00 First60=0.00 PredHel=0 Topology=o	191	0						CYT		21.957	5.51			0.668	1.959	0.004	cyt		PF13405; PF13499	EF-hand domain; EF-hand domain pair	PTHR23055	1.5e-91	AgB01_g305_t03-IPRSCAN	IPR002048; IPR018247; IPR011992; IPR002048	EF-handdomain; EF-Hand1,calcium-bindingsite; EF-handdomainpair	N	Too short sequence	-	No					-0.912775	0.00905682
305	AgB01_g306_t06	death-inducer_obliterator_1	death-inducer obliterator 1 - probable fragment	Uncharacterized	NR	0	R	1552	0	3		28	0	ExpAA=0.79 First60=0.43 PredHel=0 Topology=o	1552	0						BL	17-18	173.626	6.38	171.925	6.26	0.265	0.504	0.001	nuc	SRKRARR|SS 0.710 *ProP* ; ERKRIKR|MS 0.646 *ProP* ; PLERKNR|SP 0.538 *ProP* ; KRIRPKK|ST 0.744 *ProP* ; TVCRMPR|SW 0.513 *ProP*	PF07744; PF07500	SPOC domain; Transcription factor S-II (TFIIS), central domain	PTHR11477:SF21	1.9e-53	AgB01_g306_t06-IPRSCAN	IPR012921; IPR003618; IPR036575; IPR036575	SpenparalogueandorthologueSPOC,C-terminal; TranscriptionelongationfactorS-II,centraldomain; TranscriptionelongationfactorS-II,centraldomainsuperfamily	N	-214.43	-	No					-0.961234	0.00695814
306	AgB01_g307_t01	cral-trio_domain-containing_protein	Unknown product	Unknown			A	43	0	0	F(3.3)I(3.66)	0	0	ExpAA=21.87 First60=21.87 PredHel=1 Topology=i7-29o	43	1	51.2	32.6	16.3		14	ANC		5.341	7.07	1.481	6.61	0.718	2.858	0.006	mit						AgB01_g307_t01-IPRSCAN			N	Too short sequence	-	No					-0.870204	0.011411
307	AgB01_g308_t01	cral-trio_domain-containing_protein	Unknown product	Unknown			I	211	0	0		4	0	ExpAA=0.15 First60=0.00 PredHel=0 Topology=o	211	0						CYT		24.601	6.49			0.32	0.591	0.001	cyt				PTHR23324:SF146	8.3e-28	AgB01_g308_t01-IPRSCAN	IPR036598; IPR036865	GOLDdomainsuperfamily; CRAL-TRIOlipidbindingdomainsuperfamily	N	-197.13	-	No					-0.985379	0.00610053
308	AgB01_g309_t01	Zinc_transporter_ZIP14	Unknown product - 4 predicted membrane helices - GPI anchored	Unknown / membrane / GPI			M	103	0	0		1	0	ExpAA=65.55 First60=43.93 PredHel=3 Topology=i7-29o34-56i77-99o	103	3	64.1	8.7	27.2			BL/SIG		11.238	7.87			0.903	5.811	0.012	end		PF02535	ZIP Zinc transporter	PTHR12191:SF30	1.5e-27	AgB01_g309_t01-IPRSCAN	IPR003689	Zinc/ironpermease	Y	Too short sequence	-	No					-1.02888	0.00481215
309	AgB01_g310_t03	39s_ribosomal_protein	Protein CBG18325 - translation - structural constituent of ribosome - probable fragment	Protein Synthesis	GO	4e-15	M	123	0	0		0	0	ExpAA=3.58 First60=0.15 PredHel=0 Topology=o	123	0						CYT		13.248	10.06			0.29	0.629	0.001	mit		PF16320	Ribosomal protein L7/L12 dimerisation domain			AgB01_g310_t03-IPRSCAN	IPR008932; IPR036235	RibosomalproteinL7/L12,oligomerisation; RibosomalproteinL7/L12,oligomerisationdomainsuperfamily	N	Too short sequence	-	No					-1.01127	0.0052973
310	AgB01_g311_t01	Zinc_finger_protein_706	Zinc finger protein	Uncharacterized	NR	8e-35	M	107	0	0		2	0	ExpAA=0.00 First60=0.00 PredHel=0 Topology=o	107	0						CYT		12.199	10.21			0.855	4.648	0.009	nuc		PF04419	4F5 protein family	PTHR21213:SF8	4e-35	AgB01_g311_t01-IPRSCAN	IPR026939; IPR007513	At2g23090-like; UncharacterisedproteinfamilySERF	N	Too short sequence	-	No					-0.893857	0.0100369
311	AgB01_g312_t01	p40	Cytosolic motility protein	Uncharacterized	CDD	0	M	346	0	1	W(3.11)	10	0	ExpAA=0.00 First60=0.00 PredHel=0 Topology=o	346	0						CYT		38.738	5.95			0.202	0.396	0.001	cyt		PF12150; PF12150	Cytosolic motility protein; Cytosolic motility protein	PTHR31578	7.4e-124	AgB01_g312_t01-IPRSCAN	IPR021010; IPR021010	Cytosolicmotilityprotein	N	-170.03	-	No					-1.06277	0.00399934
312	AgB01_g313_t01	hypothetical_protein	Unknown product	Unknown			M	111	0	1		2	0	ExpAA=1.20 First60=1.19 PredHel=0 Topology=o	111	0						CYT		13.416	7.86			0.952	7.225	0.014	mit						AgB01_g313_t01-IPRSCAN			N	Too short sequence	-	No					-0.903176	0.00954167
313	AgB01_g314_t04	putative_oxidoreductase	Flavonol reductase/cinnamoyl-CoA reductase	Immunologically Relevant	KOG	2e-75	M	369	0	1		7	0	ExpAA=11.22 First60=11.21 PredHel=0 Topology=o	369	0						CYT		41.529	8.93			0.46	0.899	0.002	cyt		PF01370	NAD dependent epimerase/dehydratase family	PTHR10366:SF487	3.4e-97	AgB01_g314_t04-IPRSCAN	IPR036291; IPR001509	NAD(P)-bindingdomainsuperfamily; NAD-dependentepimerase/dehydratase	N	-130.47	-	No					-0.915904	0.00890415
314	AgB01_g315_t01	hypothetical_protein	Unknown product - 2 predicted membrane helices	Unknown / membrane			M	206	0	0	C(3.27)	16	0	ExpAA=45.15 First60=25.47 PredHel=2 Topology=i12-34o57-79i	206	2	21.4	11.2	67.5		127	CYT		22.961	5.58			0.154	0.314	0.001	end						AgB01_g315_t01-IPRSCAN			N	-174.04	-	No					-0.957027	0.00711935
315	AgB01_g316_t01	Fibroleukin	Ficolin-2 - Membrane anchor detected - 2 predicted membrane helices	Immunologically Relevant / membrAnchor / membrane	NR	0	M	450	0	1		8	0	ExpAA=22.66 First60=22.34 PredHel=1 Topology=i38-60o	450	1	4.9	86.7	8.4		390	ANC		50.412	5.63	43.239	5.22	0.783	3.45	0.007	mit	FSPRIRR|SL 0.605 *ProP*	PF00147	Fibrinogen beta and gamma chains, C-terminal globular domain	PTHR19143	2.7e-51	AgB01_g316_t01-IPRSCAN	IPR036056; IPR002181; IPR002181	Fibrinogen-like,C-terminal; Fibrinogen,alpha/beta/gammachain,C-terminalglobulardomain	N	-132.47	-	No					-0.897537	0.00983835
316	AgB01_g317_t03	hypothetical_protein	Unknown product	Unknown			M	217	0	0	C(3.3)	17	0	ExpAA=0.00 First60=0.00 PredHel=0 Topology=o	217	0						CYT		24.914	7.83			0.622	1.562	0.003	cyt	ISSPFKR|SC 0.601 *ProP*	PF07657	N terminus of Notch ligand	PTHR35014	2.3e-19	AgB01_g317_t03-IPRSCAN	IPR011651	Notchligand,N-terminaldomain	N	-259.99	-	No					-0.94809	0.00747426
317	AgB01_g318_t03	Diacylglycerol_kinase_theta	Unknown product - 2 predicted membrane helices	Unknown / membrane			M	167	0	2		9	0	ExpAA=20.76 First60=0.65 PredHel=1 Topology=i80-99o	167	1	11.4	40.7	47.9		68	CYT		18.534	6.63			0.926	6.333	0.013	mit						AgB01_g318_t03-IPRSCAN			N	Too short sequence	-	No					-0.779447	0.0186327
318	AgB01_g319_t01	hypothetical_protein	Unknown product - signalP detected - 3 predicted membrane helices	Unknown / membrane			M	121	0.826446	0	C(3.13)X(121.7)	9	0.826446	ExpAA=46.38 First60=23.53 PredHel=2 Topology=o5-27i75-97o	121	2	36.4	24	39.7		24	SIG	17-18	13.192	9.13	11.716	9.22	0.196	0.382	0.001	end						AgB01_g319_t01-IPRSCAN			N	Too short sequence	-	No					-0.959963	0.00700645
319	AgB01_g320_t01	hypothetical_protein	Unknown product - 2 predicted membrane helices	Unknown / membrane			M	189	0	0		3	0	ExpAA=20.96 First60=0.00 PredHel=1 Topology=i120-142o	189	1	11.6	24.9	63.5		47	CYT		21.651	6.52			0.636	2.112	0.004	mit						AgB01_g320_t01-IPRSCAN			N	Too short sequence	-	No					-0.903218	0.00953949
320	AgB01_g321_t03	RecName:_Full=Ovarian_abundant_message_protein;_Short=Protein_OAM	mucin-2-like isoform X2 (Homo sapiens) - probable fragment - signalP detected	Secreted / Mucin	Sigp		M	387	0.258398	0	P(3.67)V(3.39)X(38.05)	14	0.258398	ExpAA=1.21 First60=1.20 PredHel=0 Topology=o	387	0						SIG	18-19	40.387	9.38	38.445	9.32	0.546	1.608	0.003	end		PF01607; PF01607	Chitin binding Peritrophin-A domain; Chitin binding Peritrophin-A domain			AgB01_g321_t03-IPRSCAN	IPR002557; IPR036508; IPR003882; IPR002557	Chitinbindingdomain; Chitinbindingdomainsuperfamily; Pistil-specificextensin-likeprotein	N	-118.57	-	No					-0.972661	0.00653826
321	AgB01_g322_t03	ovarian_abundant_message_protein	Chitin binding Peritrophin-A domain	Extracellular Matrix	PFAM	5e-07	M	316	0	0	P(3.5)	15	0	ExpAA=0.13 First60=0.00 PredHel=0 Topology=o	316	0						BL	24-25	32.822	5.12	29.942	4.69	0.602	1.846	0.004	cyt		PF01607; PF01607	Chitin binding Peritrophin-A domain; Chitin binding Peritrophin-A domain	PTHR23301:SF26	3.8e-13	AgB01_g322_t03-IPRSCAN	IPR002557; IPR036508; IPR002557	Chitinbindingdomain; Chitinbindingdomainsuperfamily	N	-156.26	-	No					-0.883427	0.0106214
322	AgB01_g323_t01	hypothetical_protein	Unknown product - signalP detected - 3 predicted membrane helices	Unknown / membrane			M	151	0	0		5	0	ExpAA=66.51 First60=38.15 PredHel=3 Topology=o10-32i45-67o82-104i	151	3	43.7	16.6	39.7			SIG	24-25	17.141	9.02	14.425	9.23	0.465	1.068	0.002	end		PF10316	Serpentine type 7TM GPCR chemoreceptor Srbc			AgB01_g323_t01-IPRSCAN	IPR019420	7TMGPCR,serpentinereceptorclassbc(Srbc)	N	Too short sequence	-	No					-1.01876	0.00508524
323	AgB01_g324_t01	hypothetical_protein	Unknown product - 3 predicted membrane helices	Unknown / membrane			S	176	0	0		6	0	ExpAA=66.27 First60=23.74 PredHel=3 Topology=o15-33i63-85o95-117i	176	3	35.2	14.2	50.6			ANC		20.003	10.04	16.026	9.92	0.262	0.503	0.001	end		PF10323	Serpentine type 7TM GPCR chemoreceptor Srv			AgB01_g324_t01-IPRSCAN	IPR019426	7TMGPCR,serpentinereceptorclassv(Srv)	N	Too short sequence	-	No					-0.908758	0.00925669
324	AgB01_g325_t03	Plexin_domain-containing_protein_2	Extracellular protein TEM7 contains PSI domain (tumor endothelial marker in humans) - signalP detected	Extracellular Matrix	KOG	0	M	491	0	0		11	0	ExpAA=36.25 First60=13.74 PredHel=1 Topology=o436-458i	491	1	4.5	88.8	6.7		33	SIG	37-38	56.407	6.33	52.325	6.11	0.425	0.644	0.001	mit	LNARHKR|GI 0.806 *ProP*			PTHR13055:SF12	1.7e-137	AgB01_g325_t03-IPRSCAN	IPR031152	Plexindomain-containingprotein	N	-108.56	-	No					-0.923609	0.00853891
325	AgB01_g326_t01	hypothetical_protein	Unknown product	Unknown			M	96	0	0		0	0	ExpAA=0.04 First60=0.01 PredHel=0 Topology=i	96	0						CYT		10.751	9.6			0.832	3.927	0.008	nuc						AgB01_g326_t01-IPRSCAN			N	Too short sequence	-	No					-1.03094	0.00475817
326	AgB01_g327_t02	hypothetical_protein	Unknown product	Unknown			A	220	0	0		7	0	ExpAA=0.00 First60=0.00 PredHel=0 Topology=o	220	0						CYT		24.426	4.61			0.309	5.513	0.011	nuc						AgB01_g327_t02-IPRSCAN			N	-215.82	-	No					-0.881586	0.010728
327	AgB01_g328_t01	hypothetical_protein	Unknown product	Unknown			M	128	0	0		4	0	ExpAA=0.30 First60=0.01 PredHel=0 Topology=i	128	0						CYT		15.135	9.39			0.131	0.95	0.002	cyt						AgB01_g328_t01-IPRSCAN			N	Too short sequence	-	No					-0.912924	0.0090495
328	AgB01_g329_t03	Long-chain-fatty-acid--CoA_ligase_5	Unknown product	Unknown			M	248	0	2		3	0	ExpAA=0.00 First60=0.00 PredHel=0 Topology=o	248	0						CYT		27.657	4.82			0.725	2.42	0.005	exc						AgB01_g329_t03-IPRSCAN			N	-192.06	-	No					-0.970018	0.00663308
329	AgB01_g330_t02	Long-chain-fatty-acid--CoA_ligase_5	long-chain acyl-CoA synthetase	Lipid Metabolism	PRK	0	M	708	0	0		17	0	ExpAA=12.28 First60=0.00 PredHel=0 Topology=o	708	0						CYT		78.736	7.77			0.453	0.918	0.002	cyt		PF00501	AMP-binding enzyme	PTHR43272	1.5e-238	AgB01_g330_t02-IPRSCAN	IPR000873; IPR020845	AMP-dependentsynthetase/ligase; AMP-binding,conservedsite	N	-138.62	-	No					-0.961307	0.00695536
330	AgB01_g331_t01	Long-chain-fatty-acid--CoA_ligase_5	Unknown product	Unknown			M	130	0	0		4	0	ExpAA=0.02 First60=0.00 PredHel=0 Topology=o	130	0						CYT		15.733	9.57			0.852	4.49	0.009	mit						AgB01_g331_t01-IPRSCAN			N	Too short sequence	-	No					-0.91241	0.00907484
331	AgB01_g332_t01	hypothetical_protein	Unknown product	Unknown			M	61	0	0	M(3.21)	3	0	ExpAA=4.40 First60=4.40 PredHel=0 Topology=i	61	0						CYT		7.066	8.59			0.667	2.006	0.004	nuc						AgB01_g332_t01-IPRSCAN			N	Too short sequence	-	No					-0.997867	0.00569906
332	AgB01_g333_t01	carnitine_acylcarnitine_carrier_protein_cacl	carnitine acylcarnitine carrier protein cacl	Transporters	NR	0	M	344	0	0		5	0	ExpAA=85.68 First60=21.79 PredHel=1 Topology=i27-49o	344	1	6.4	85.8	7.8		295	CYT		38.279	9.53			0.868	4.752	0.01	nuc	AMHRRYR|SP 0.528 *ProP*	PF00153; PF00153; PF00153	Mitochondrial carrier protein; Mitochondrial carrier protein; Mitochondrial carrier protein	PTHR24089:SF425	8.3e-68	AgB01_g333_t01-IPRSCAN	IPR018108; IPR023395; IPR002067; IPR023395	Mitochondrialsubstrate/solutecarrier; Mitochondrialcarrierdomainsuperfamily; Mitochondrialcarrierprotein	N	-91.14	-	No					-1.01175	0.00528337
333	AgB01_g334_t04	hypothetical_protein	Unknown product	Unknown			M	232	0	0		8	0	ExpAA=0.04 First60=0.00 PredHel=0 Topology=o	232	0						CYT		24.755	8.84			0.899	5.737	0.011	nuc						AgB01_g334_t04-IPRSCAN			N	-181.98	-	No					-0.994877	0.0057927
334	AgB01_g335_t02	hypothetical_protein	Conserved secreted protein precursor - GPI anchored	Secreted / Uncharacterized / GPI	CDD	5e-37	M	173	0	0		0	0	ExpAA=1.55 First60=1.55 PredHel=0 Topology=o	173	0						SIG	20-21	19.726	4.42	17.326	4.35	0.854	4.564	0.009	exc		PF02520	Domain of unknown function DUF148	PTHR21593:SF19	1.4e-13	AgB01_g335_t02-IPRSCAN	IPR003677	DomainofunknownfunctionDUF148	Y	Too short sequence	-	No					-0.972837	0.00653199
335	AgB01_g336_t01	hypothetical_protein	hypothetical secreted protein precursor	Secreted / Unknown			M	115	0	1		1	0	ExpAA=2.50 First60=2.50 PredHel=0 Topology=o	115	0						SIG	24-25	12.817	4.63	10.107	4.42	0.875	5.187	0.01	cyt						AgB01_g336_t01-IPRSCAN			N	Too short sequence	-	No					-1.00423	0.0055046
336	AgB01_g337_t01	putative_methylmalonyl	methylmalonyl-CoA mutase mitochondrial	Energy Metabolism	NR	5e-60	M	196	0	0		6	0	ExpAA=0.03 First60=0.01 PredHel=0 Topology=o	196	0						CYT		21.301	5.85			0.364	0.671	0.001	mit				PTHR42710	1.3e-38	AgB01_g337_t01-IPRSCAN	IPR006159; IPR006158; IPR036724	Methylmalonyl-CoAmutase,C-terminal; Cobalamin(vitaminB12)-bindingdomain; Cobalamin-bindingdomainsuperfamily	N	Too short sequence	-	No					-1.00037	0.00562174
337	AgB01_g338_t01	Protein_midA,_partial	NADH dehydrogenase complex assembly - ATP metabolic process - mitochondrial respiratory chain complex I assembly - methylation - transferase -	Energy Metabolism	GO	0	D	528	0	1		8	0	ExpAA=13.85 First60=13.39 PredHel=0 Topology=o	528	0						CYT		59.719	6.28			0.358	0.663	0.001	cyt	IGVRLRR|LV 0.560 *ProP*	PF02636	Putative S-adenosyl-L-methionine-dependent methyltransferase	PTHR12049	5.4e-127	AgB01_g338_t01-IPRSCAN	IPR029063; IPR003788; IPR038375	S-adenosyl-L-methionine-dependentmethyltransferase; ProteinargininemethyltransferaseNDUFAF7; ProteinargininemethyltransferaseNDUFAF7superfamily	N	-128.09	-	No					-0.973147	0.00652098
338	AgB01_g339_t02	Calreticulin	calreticulin - protein folding - calcium ion binding - unfolded protein binding - endoplasmic reticulum - probable fragment	Post-translation Modification	GO	0	S	328	0.304878	3	X(44.9)	9	0.304878	ExpAA=8.59 First60=7.79 PredHel=0 Topology=o	328	0						BL/SIG		37.257	8.95			0.399	0.818	0.002	mit	RALRRRR|SR 0.519 *ProP* ; RRSRKPR|RA 0.687 *ProP*	PF00262	Calreticulin family	PTHR11073:SF21	2.7e-120	AgB01_g339_t02-IPRSCAN	IPR013320; IPR009033; IPR018124; IPR001580; IPR001580	ConcanavalinA-likelectin/glucanasedomainsuperfamily; Calreticulin/calnexin,Pdomainsuperfamily; Calreticulin/calnexin,conservedsite; Calreticulin/calnexin	N	-166.37	-	No					0.0573224	0.651221
339	AgB01_g340_t01	Innexin-16	innexin unc-9 - 4 predicted membrane helices	Extracellualr Matrix / membrane	NR	0	M	368	0	0		11	0	ExpAA=89.17 First60=21.42 PredHel=4 Topology=i31-53o99-121i197-219o289-311i	368	4	23.9	31.5	44.6			CYT		42.714	6.08			0.268	0.87	0.002	end		PF00876	Innexin	PTHR11893	1.7e-101	AgB01_g340_t01-IPRSCAN	IPR000990; IPR000990	Innexin	N	-65.69	-	No					-1.01079	0.00531114
340	AgB01_g341_t01	Innexin-16	Unknown product	Unknown			L	82	0	0		1	0	ExpAA=11.67 First60=4.00 PredHel=0 Topology=o	82	0						CYT		9.619	5.12			0.772	3.296	0.007	cyt						AgB01_g341_t01-IPRSCAN			N	Too short sequence	-	No					-1.00782	0.0053979
341	AgB01_g342_t01	Serpin_B10	Unknown product	Unknown			L	108	0	0		1	0	ExpAA=0.07 First60=0.00 PredHel=0 Topology=o	108	0						CYT		12.176	6.94			0.602	1.547	0.003	cyt		PF00079	Serpin (serine protease inhibitor)	PTHR11461:SF175	1.3e-26	AgB01_g342_t01-IPRSCAN	IPR023795; IPR023796; IPR000215; IPR036186	Serpin,conservedsite; Serpindomain; Serpinfamily; Serpinsuperfamily	N	Too short sequence	-	No					-0.692531	0.0296721
342	AgB01_g343_t01	Serpin-like_protein	hypothetical secreted protein precursor	Secreted / Unknown			M	111	0	0		0	0	ExpAA=16.06 First60=16.05 PredHel=1 Topology=o15-32i	111	1	15.3	13.5	71.2		79	SIG	34-35	12.186	9.7	8.825	8.89	0.106	0.23	0	mit		PF00079	Serpin (serine protease inhibitor)	PTHR11461:SF284	6.7e-18	AgB01_g343_t01-IPRSCAN	IPR036186; IPR023796; IPR000215	Serpinsuperfamily; Serpindomain; Serpinfamily	N	Too short sequence	-	No					-0.98816	0.00600876
343	AgB01_g344_t01	hypothetical_protein	Unknown product	Unknown			M	122	0	0	W(3.67)	8	0	ExpAA=0.34 First60=0.11 PredHel=0 Topology=o	122	0						CYT		13.823	9.02			0.784	3.768	0.008	mit						AgB01_g344_t01-IPRSCAN			N	Too short sequence	-	No					-0.90955	0.00921694
344	AgB01_g345_t01	Protein_SUP-1	Unknown product - 3 predicted membrane helices	Unknown / membrane			M	115	0	0	F(3.5)	3	0	ExpAA=69.11 First60=43.62 PredHel=3 Topology=o5-24i36-58o73-92i	115	3	52.2	17.4	30.4			BL/ANC		13.921	9.22			0.356	0.838	0.002	end						AgB01_g345_t01-IPRSCAN			N	Too short sequence	-	No					-1.03268	0.0047132
345	AgB01_g346_t03	Chromatin-remodeling_complex_ATPase_chain_isw-1	hypothetical secreted protein precursor	Secreted / Unknown			M	317	0	0		0	0	ExpAA=1.54 First60=1.54 PredHel=0 Topology=o	317	0						SIG	27-28	36.416	8.95	33.547	8.77	0.741	2.506	0.005	nuc						AgB01_g346_t03-IPRSCAN			N	-250.5	-	No					-0.990684	0.00592664
346	AgB01_g347_t07	Chromatin-remodeling_complex_ATPase_chain_isw-1	Chromatin remodeling complex SWI/SNF component SWI2 - probable fragment	Nuclear Regulation	KOG	0	R	1078	0	0		8	0	ExpAA=0.04 First60=0.00 PredHel=0 Topology=o	1078	0						CYT		124.797	6.63			0.218	0.423	0.001	nuc		PF09110; PF00271; PF09111; PF00176	HAND; Helicase conserved C-terminal domain; SLIDE; SNF2 family N-terminal domain	PTHR10799:SF887	0	AgB01_g347_t07-IPRSCAN	IPR029915; IPR015194; IPR001650; IPR009057; IPR036306; IPR027417; IPR014001; IPR001005; IPR015195; IPR017884; IPR038718; IPR000330; IPR001650	ISWIfamily; ISWI,HANDdomain; Helicase,C-terminal; Homeobox-likedomainsuperfamily; ISWI,HANDdomainsuperfamily; P-loopcontainingnucleosidetriphosphatehydrolase; Helicasesuperfamily1/2,ATP-bindingdomain; SANT/Mybdomain; SLIDEdomain; SANTdomain; SNF2-like,N-terminaldomainsuperfamily; SNF2-related,N-terminaldomain	N	-235.04	-	No					-0.972042	0.00656035
347	AgB01_g348_t01	hypothetical_protein	Unknown product	Unknown			M	82	0	0		4	0	ExpAA=0.00 First60=0.00 PredHel=0 Topology=o	82	0						CYT		9.626	10.07			0.824	3.96	0.008	nuc						AgB01_g348_t01-IPRSCAN			N	Too short sequence	-	No					-0.994448	0.00580628
348	AgB01_g349_t04	copper-transporting_atpase_1	Copper-transporting ATPase 1	Transporters	NR	0	R	427	0	1		17	0	ExpAA=0.05 First60=0.00 PredHel=0 Topology=o	427	0						CYT		45.968	4.78			0.648	2.624	0.005	nuc		PF00403; PF00403; PF00403; PF00403	Heavy-metal-associated domain; Heavy-metal-associated domain; Heavy-metal-associated domain; Heavy-metal-associated domain	PTHR43520	8.8e-76	AgB01_g349_t04-IPRSCAN	IPR006121; IPR017969; IPR036163; IPR006122; IPR036163	Heavymetal-associateddomain,HMA; Heavy-metal-associated,conservedsite; Heavymetal-associateddomainsuperfamily; Heavymetal-associateddomain,copperion-binding	N	-126.65	-	No					-0.955431	0.00718148
349	AgB01_g350_t01	26S_proteasome_non-ATPase_regulatory_subunit_14	26S proteasome non-ATPase regulatory subunit 14 - probable fragment	Proteasome	NR	1e-79	M	167	0.598802	2	X(88.18)	2	0.598802	ExpAA=0.02 First60=0.00 PredHel=0 Topology=o	167	0						CYT		18.539	6.06			0.867	0.486	0.001	mit		PF01398	JAB1/Mov34/MPN/PAD-1 ubiquitin protease	PTHR10410:SF5	1.4e-98	AgB01_g350_t01-IPRSCAN	IPR000555; IPR037518	JAB1/MPN/MOV34metalloenzymedomain; MPNdomain	N	Too short sequence	-	No					-0.982226	0.00620624
350	AgB01_g351_t02	Rhotekin	cortical cytoskeleton organization - mitotic cytokinesis - actomyosin contractile ring assembly - GTP-Rho binding - protein	Cytoskeletal	GO	2e-56	M	596	0	2		11	0	ExpAA=0.01 First60=0.00 PredHel=0 Topology=o	596	0						CYT		66.756	9.54			0.464	0.745	0.001	nuc	LVERKKR|RI 0.651 *ProP*	PF08174	Cell division protein anillin	PTHR21538	1.2e-60	AgB01_g351_t02-IPRSCAN	IPR001849; IPR012966	Pleckstrinhomologydomain; Anillinhomologydomain	N	-130.06	-	No					-0.930023	0.00824626
351	AgB01_g352_t01	swib_mdm2_domain-containing_protein	transcription factor binding - transcription DNA-templated - nucleus	Transcription Factor	GO	1e-21	M	272	0	1		2	0	ExpAA=0.01 First60=0.00 PredHel=0 Topology=o	272	0						CYT		30.768	6.71			0.386	4.092	0.008	nuc		PF02201	SWIB/MDM2 domain	PTHR13844	1.3e-32	AgB01_g352_t01-IPRSCAN	IPR036885; IPR019835; IPR003121	SWIB/MDM2domainsuperfamily; SWIBdomain; SWIB/MDM2domain	N	-245.88	-	No					-0.960217	0.00699678
352	AgB01_g353_t02	hypothetical_protein	vulcan - signaling	Protein Export	GO	1e-17	M	500	0	0		8	0	ExpAA=0.00 First60=0.00 PredHel=0 Topology=o	500	0						CYT		54.917	9.18			0.203	5.069	0.01	nuc		PF03359	Guanylate-kinase-associated protein (GKAP) protein	PTHR12353	2.4e-24	AgB01_g353_t02-IPRSCAN	IPR005026	SAPAPfamily	N	-155.6	-	No					-0.91545	0.00892614
353	AgB01_g354_t04	Phosphoglucomutase-2	Phosphoglucomutase/phosphomannomutase	Carbohydrate Metabolism	KOG	0	M	505	0	3		7	0	ExpAA=3.04 First60=2.61 PredHel=0 Topology=o	505	0						BL	21-22	56.367	5.95	54.226	6.18	0.557	1.215	0.002	cyt		PF00408; PF02879; PF02878; PF02880	Phosphoglucomutase/phosphomannomutase, C-terminal domain; Phosphoglucomutase/phosphomannomutase, alpha/beta/alpha domain II; Phosphoglucomutase/phosphomannomutase, alpha/beta/alpha domain I; Phosphoglucomutase/phosphomannomutase, alpha/beta/alpha domain III	PTHR22573	3e-164	AgB01_g354_t04-IPRSCAN	IPR005843; IPR016055; IPR005845; IPR005844; IPR005841; IPR036900; IPR005846; IPR016066	Alpha-D-phosphohexomutase,C-terminal; Alpha-D-phosphohexomutase,alpha/beta/alphaI/II/III; Alpha-D-phosphohexomutase,alpha/beta/alphadomainII; Alpha-D-phosphohexomutase,alpha/beta/alphadomainI; Alpha-D-phosphohexomutasesuperfamily; Alpha-D-phosphohexomutase,C-terminaldomainsuperfamily; Alpha-D-phosphohexomutase,alpha/beta/alphadomainIII; Alpha-D-phosphohexomutase,conservedsite	N	-134.21	-	No					-0.944128	0.00763718
354	AgB01_g355_t05	NTF2-related_export_protein	nucleocytoplasmic transport - protein transporter - nuclear pore central transport channel - protein import into nucleus - mRNA transport - protein	Nuclear Export	GO	3e-10	M	84	0	0		1	0	ExpAA=0.31 First60=0.31 PredHel=0 Topology=o	84	0						CYT		9.531	4.86			0.379	0.753	0.002	cyt		PF02136	Nuclear transport factor 2 (NTF2) domain	PTHR12612:SF9	2.6e-14	AgB01_g355_t05-IPRSCAN	IPR032710; IPR002075	NTF2-likedomainsuperfamily; Nucleartransportfactor2	N	Too short sequence	-	No					-0.783369	0.0182435
355	AgB01_g356_t05	adenosylhomocysteinase	S-adenosylhomocysteine hydrolase	Internal Metabolism	KOG	0	M	437	0	1		9	0	ExpAA=0.04 First60=0.02 PredHel=0 Topology=o	437	0						CYT		47.862	5.94			0.529	1.103	0.002	cyt		PF00670; PF05221	S-adenosyl-L-homocysteine hydrolase, NAD binding domain; S-adenosyl-L-homocysteine hydrolase	PTHR23420	2.6e-239	AgB01_g356_t05-IPRSCAN	IPR000043; IPR020082; IPR015878; IPR034373; IPR036291; IPR000043	Adenosylhomocysteinase-like; S-adenosyl-L-homocysteinehydrolase,conservedsite; S-adenosyl-L-homocysteinehydrolase,NADbindingdomain; Adenosylhomocysteinase; NAD(P)-bindingdomainsuperfamily	N	-165.05	-	No					-1.01974	0.00505827
356	AgB01_g357_t02	Translation_initiation_factor_eIF-2B_subunit_alpha	translation initiation factor eif-2b subunit alpha	Protein Synthesis	NR	0	M	311	0	0		3	0	ExpAA=0.08 First60=0.00 PredHel=0 Topology=o	311	0						CYT		34.858	5.77			0.284	0.531	0.001	cyt		PF01008	Initiation factor 2 subunit family	PTHR10233:SF18	6.5e-106	AgB01_g357_t02-IPRSCAN	IPR037171; IPR000649	NagB/RpiAtransferase-like; Initiationfactor2B-related	N	-147.76	-	No					-0.990576	0.00593013
357	AgB01_g358_t01	Translation_initiation_factor_eIF-2B_subunit_alpha	Unknown product	Unknown			M	120	0.833333	0	X(122.72)	2	0.833333	ExpAA=14.50 First60=13.31 PredHel=0 Topology=o	120	0						BL	34-35	13.692	5	9.793	4.84	0.85	4.774	0.01	mit		PF01008	Initiation factor 2 subunit family	PTHR10233	1.7e-13	AgB01_g358_t01-IPRSCAN	IPR037171; IPR000649	NagB/RpiAtransferase-like; Initiationfactor2B-related	N	Too short sequence	-	No					-0.975868	0.00642501
358	AgB01_g359_t01	hypothetical_protein	Unknown product	Unknown			M	99	0	1		6	0	ExpAA=13.53 First60=13.52 PredHel=0 Topology=o	99	0						ANC		11.556	10.97	4.004	9.3	0.45	1.566	0.003	nuc						AgB01_g359_t01-IPRSCAN			N	Too short sequence	-	No					-0.977923	0.00635349
359	AgB01_g360_t03	putative_protein_phosphatase_methylesterase_1	protein phosphatase methylesterase 1	Signal Transduction	NR	0	M	329	0	0		6	0	ExpAA=0.16 First60=0.00 PredHel=0 Topology=o	329	0						CYT		36.392	7.66			0.911	6.11	0.012	mit	GTARNLR|SA 0.538 *ProP*	PF12697	Alpha/beta hydrolase family	PTHR14189	3.9e-108	AgB01_g360_t03-IPRSCAN	IPR016812; IPR000073; IPR029058; IPR000639; IPR000073	Proteinphosphatasemethylesterase,eukaryotic; Alpha/betahydrolasefold-1; Alpha/Betahydrolasefold; Epoxidehydrolase-like	N	-153.35	-	No					-0.944993	0.00760131
360	AgB01_g361_t01	Protein_phosphatase_methylesterase_1	Unknown product	Unknown			M	103	0	0		3	0	ExpAA=0.02 First60=0.01 PredHel=0 Topology=o	103	0						CYT		11.997	10.38			0.693	2.496	0.005	mit						AgB01_g361_t01-IPRSCAN			N	Too short sequence	-	No					-1.04957	0.00429815
361	AgB01_g362_t04	Histone-lysine_N-methyltransferase_PRDM9	protein phosphatase methylesterase 1 - probable fragment	Signal Transduction	NR	0	Y	265	0	1		6	0	ExpAA=0.03 First60=0.00 PredHel=0 Topology=o	265	0						CYT		30.183	4.99			0.553	1.194	0.002	cyt	ISQRPKK|MT 0.512 *ProP*	PF00856	SET domain	PTHR16515:SF2	2.2e-70	AgB01_g362_t04-IPRSCAN	IPR001214; IPR001214	SETdomain	N	-157.27	-	No					-1.01781	0.0051116
362	AgB01_g363_t02	Histone-lysine_N-methyltransferase_PRDM9	Unknown product	Unknown			M	133	0	0		2	0	ExpAA=0.06 First60=0.00 PredHel=0 Topology=o	133	0						CYT		15.008	9.47			0.752	2.871	0.006	nuc						AgB01_g363_t02-IPRSCAN			N	Too short sequence	-	No					-0.952077	0.0073138
363	AgB01_g364_t04	organic_cation_transporter_protein	Unknown product	Unknown			M	113	0	0		2	0	ExpAA=19.41 First60=12.83 PredHel=0 Topology=o	113	0						CYT		12.148	8.8			0.823	3.844	0.008	mit				PTHR24064:SF430	2.4e-21	AgB01_g364_t04-IPRSCAN	IPR036259	MFStransportersuperfamily	N	Too short sequence	-	No					-0.963579	0.00686984
364	AgB01_g365_t02	gamma-aminobutyric_acid_receptor_subunit_beta	Gamma-aminobutyric acid receptor subunit beta - 6 predicted membrane helices	Signal Transduction / membrane	NR	0	E	485	0	3		6	0	ExpAA=109.63 First60=22.00 PredHel=5 Topology=i13-35o247-269i278-300o310-332i454-476o	485	5	22.7	47.6	29.7			BL	32-33	55.574	6.24	51.663	6.23	0.311	0.583	0.001	end		PF02932; PF02931	Neurotransmitter-gated ion-channel transmembrane region; Neurotransmitter-gated ion-channel ligand binding domain	PTHR18945:SF611	3.5e-140	AgB01_g365_t02-IPRSCAN	IPR036734; IPR006029; IPR006028; IPR006201; IPR036719; IPR006202	Neurotransmitter-gatedion-channelligand-bindingdomainsuperfamily; Neurotransmitter-gatedion-channeltransmembranedomain; Gamma-aminobutyricacidAreceptor/Glycinereceptoralpha; Neurotransmitter-gatedion-channel; Neurotransmitter-gatedion-channeltransmembranedomainsuperfamily; Neurotransmitter-gatedion-channelligand-bindingdomain	N	-85.24	-	No					-0.994666	0.00579938
365	AgB01_g366_t01	gamma-aminobutyric_acid_receptor_subunit_beta	Neurotransmitter-gated ion-channel ligand binding domain - probable fragment - Membrane anchor detected	Transporters / membrAnchor	PFAM	2e-41	M	207	0	2		5	0	ExpAA=22.46 First60=22.43 PredHel=1 Topology=i7-29o	207	1	10.6	86	3.4		178	ANC		24.051	5.84	20.062	5.94	0.586	1.608	0.003	nuc		PF02931	Neurotransmitter-gated ion-channel ligand binding domain	PTHR18945:SF611	3.4e-111	AgB01_g366_t01-IPRSCAN	IPR036734; IPR018000; IPR006201; IPR006202; IPR006201	Neurotransmitter-gatedion-channelligand-bindingdomainsuperfamily; Neurotransmitter-gatedion-channel,conservedsite; Neurotransmitter-gatedion-channel; Neurotransmitter-gatedion-channelligand-bindingdomain	N	-223.41	-	No					-0.915331	0.00893192
366	AgB01_g367_t01	glutamate-gated_chloride_channel	glutamate-gated chloride channel - signalP detected - 3 predicted membrane helices - GPI anchored	Amino Acid Metabolism / membrane / GPI	NR	2e-98	M	181	0	0		5	0	ExpAA=45.26 First60=22.46 PredHel=2 Topology=o7-29i152-174o	181	2	24.3	7.7	68		7	SIG	29-30	21.226	8.84	18.011	9.51	0.491	1.119	0.002	end						AgB01_g367_t01-IPRSCAN	IPR036719; IPR006028; IPR006028	Neurotransmitter-gatedion-channeltransmembranedomainsuperfamily; Gamma-aminobutyricacidAreceptor/Glycinereceptoralpha	Y	Too short sequence	-	No					-0.973825	0.00649694
367	AgB01_g368_t03	ribosomal_rna_small_subunit_methyltransferase_nep-1	DNA biosynthetic process - transcription - probable fragment	Transcription Machinery	GO	5e-54	M	574	0	0		7	0	ExpAA=0.83 First60=0.13 PredHel=0 Topology=o	574	0						CYT		64.374	5.12			0.677	2.015	0.004	mit	VNVRAGR|SV 0.587 *ProP*	PF04931	DNA polymerase phi	PTHR13213	3.3e-61	AgB01_g368_t03-IPRSCAN	IPR007015; IPR016024; IPR007015	DNApolymeraseV; Armadillo-typefold	N	-138.95	-	No					-0.947458	0.0075
368	AgB01_g369_t03	ribosomal_rna_small_subunit_methyltransferase_nep-1	ribosomal rna small subunit methyltransferase nep-1	Protein Synthesis	NR	0	M	231	0	1		6	0	ExpAA=0.00 First60=0.00 PredHel=0 Topology=o	231	0						CYT		25.421	9.11			0.526	1.145	0.002	nuc		PF03587	EMG1/NEP1 methyltransferase	PTHR12636	1.8e-92	AgB01_g369_t03-IPRSCAN	IPR005304; IPR029026; IPR029028; IPR005304	Ribosomalbiogenesis,methyltransferase,EMG1/NEP1; tRNA(guanine-N1-)-methyltransferase,N-terminal; Alpha/betaknotmethyltransferases	N	-186.89	-	No					-0.984921	0.00611577
369	AgB01_g370_t01	hypothetical_protein	Unknown product	Unknown			M	103	0	0	Q(3.24)	4	0	ExpAA=0.00 First60=0.00 PredHel=0 Topology=o	103	0						CYT		11.803	9.1			0.832	3.815	0.008	nuc	VQARKRR|NV 0.706 *ProP*					AgB01_g370_t01-IPRSCAN			N	Too short sequence	-	No					-0.973761	0.00649921
370	AgB01_g371_t01	hypothetical_protein	Pre-mRNA-splicing factor ATP-dependent RNA helicase PRP16 partial - probable fragment	Transcription Machinery	NR	7e-23	M	216	0	0	G(4.67)R(3.13)	0	0	ExpAA=0.00 First60=0.00 PredHel=0 Topology=o	216	0						CYT		22.835	11.39			0.539	1.177	0.002	nuc	TRRREAR|SE 0.706 *ProP* ; GRKRGRR|GG 0.571 *ProP* ; GKRRRRR|GA 0.788 *ProP*					AgB01_g371_t01-IPRSCAN			N	-367.41	-	No					-0.972306	0.00655091
371	AgB01_g372_t01	Arf-GAP_with_GTPase,_ANK_repeat_and_PH_domain-containing_protein_3	GTPase-activating protein Centaurin gamma (contains Ras-like GTPase - probable fragment	Signal Transduction	KOG	4e-83	M	849	0	0		18	0	ExpAA=0.81 First60=0.00 PredHel=0 Topology=o	849	0						CYT		93.919	8.29			0.353	0.653	0.001	nuc		PF00071; PF01412	Ras family; Putative GTPase activating protein for Arf	PTHR23180	1.6e-172	AgB01_g372_t01-IPRSCAN	IPR001849; IPR001806; IPR011993; IPR001164; IPR038508; IPR037278; IPR027417	Pleckstrinhomologydomain; SmallGTPasesuperfamily; PH-likedomainsuperfamily; ArfGTPaseactivatingprotein; ArfGAPdomainsuperfamily; ARFGAP/RecO-likezincfinger; P-loopcontainingnucleosidetriphosphatehydrolase	N	-101.16	-	No					-0.97173	0.0065715
372	AgB01_g373_t01	spectrin_beta_brain_1	Unknown product	Unknown			M	227	0	0		5	0	ExpAA=9.94 First60=5.88 PredHel=0 Topology=o	227	0						CYT		25.469	9.51			0.733	2.385	0.005	nuc						AgB01_g373_t01-IPRSCAN			N	-223.85	-	No					-0.952883	0.00728178
373	AgB01_g374_t01	hypothetical_protein	Unknown product	Unknown			M	254	0	0		7	0	ExpAA=0.17 First60=0.00 PredHel=0 Topology=o	254	0						CYT		28.623	8.44			0.749	1.412	0.003	end						AgB01_g374_t01-IPRSCAN			N	-176.97	-	No					-0.998299	0.00568565
374	AgB01_g375_t02	S-phase_kinase-associated_protein_1	s-phase kinase-associated protein 1	Signal Transduction	NR	1e-85	M	182	0	0		5	0	ExpAA=0.21 First60=0.00 PredHel=0 Topology=o	182	0						CYT		20.957	4.65			0.652	0.495	0.001	mit		PF01466; PF03931	Skp1 family, dimerisation domain; Skp1 family, tetramerisation domain	PTHR11165:SF24	2.6e-44	AgB01_g375_t02-IPRSCAN	IPR016897; IPR016072; IPR011333; IPR036296; IPR016073; IPR001232	S-phasekinase-associatedprotein1; SKP1component,dimerisation; SKP1/BTB/POZdomainsuperfamily; SKP1-like,dimerisationdomainsuperfamily; SKP1component,POZdomain; S-phasekinase-associatedprotein1-like	N	Too short sequence	-	No					-0.915913	0.0089037
375	AgB01_g376_t01	hypothetical_protein	Unknown product	Unknown			M	224	0	0	W(3.6)	8	0	ExpAA=0.00 First60=0.00 PredHel=0 Topology=o	224	0						CYT		26.076	10.96			0.689	2.046	0.004	nuc						AgB01_g376_t01-IPRSCAN			N	-242.58	-	No					-1.0124	0.00526488
376	AgB01_g377_t01	hypothetical_protein	Unknown product	Unknown			M	220	0	0		10	0	ExpAA=0.00 First60=0.00 PredHel=0 Topology=o	220	0						CYT		25.27	10.14			0.809	3.423	0.007	nuc						AgB01_g377_t01-IPRSCAN			N	-247.03	-	No					-0.981106	0.00624426
377	AgB01_g378_t06	Neuropeptide_receptor_15	neuropeptide receptor 15 - signalP detected - 7 predicted membrane helices	Signal Transduction / membrane	NR	0	M	359	0	0		11	0	ExpAA=153.98 First60=35.29 PredHel=7 Topology=o15-37i50-72o87-109i130-152o176-198i235-254o269-291i	359	7	42.1	19.2	38.7			SIG	27-28	41.33	9.8	38.498	9.72	0.33	0.629	0.001	end		PF00001	7 transmembrane receptor (rhodopsin family)	PTHR24228:SF22	1.2e-109	AgB01_g378_t06-IPRSCAN	IPR000276; IPR017452; IPR000276	Gprotein-coupledreceptor,rhodopsin-like; GPCR,rhodopsin-like,7TM	N	61.02	69.96	GPCR					-0.99513	0.00578473
378	AgB01_g379_t07	hypothetical_protein	Unknown product	Unknown			M	180	0	0		1	0	ExpAA=0.00 First60=0.00 PredHel=0 Topology=o	180	0						CYT		20.244	5.97			0.685	2.057	0.004	nuc						AgB01_g379_t07-IPRSCAN			N	Too short sequence	-	No					-0.960576	0.0069831
379	AgB01_g380_t03	Bestrophin-1	chloride transmembrane transport - chloride channel complex - integral component of membrane - membrane - chloride transport - ion transport - probable fragment - 4 predicted membrane helices	Transporters / membrane	GO	3e-87	M	482	0	1		6	0	ExpAA=61.22 First60=22.11 PredHel=3 Topology=i21-43o176-198i219-236o	482	3	12.7	78.6	8.7			CYT		54.995	5.99			0.768	3.116	0.006	end		PF01062	Bestrophin, RFP-TM, chloride channel	PTHR10736	4.7e-128	AgB01_g380_t03-IPRSCAN	IPR021134; IPR000615	Bestrophin/UPF0187; Bestrophin	N	-89.44	-	No					-0.932698	0.00812715
380	AgB01_g381_t02	Uncharacterized_protein_F10E9.4	DNA-directed RNA polymerase complex - positive regulation of nuclear-transcribed mRNA poly(A) tail shortening - positive regulation of translational - 2 predicted membrane helices	Transcription Machinery / membrane	GO	7e-16	M	283	0	0		7	0	ExpAA=23.05 First60=0.00 PredHel=1 Topology=i251-273o	283	1	7.8	3.5	88.7		10	CYT		32.242	9.47			0.533	1.209	0.002	gol				PTHR12709:SF6	1.2e-18	AgB01_g381_t02-IPRSCAN			N	-141.46	-	No					-0.980418	0.00626769
381	AgB01_g382_t02	glycosylation_related_family_member_(gly-15)	Beta-13-galactosyl-O-glycosyl-glycoprotein beta-16-N-acetylglucosaminyltransferase - probable fragment	Carbohydrate Metabolism	NR	9e-94	M	303	0	0		10	0	ExpAA=34.67 First60=22.09 PredHel=1 Topology=i27-49o	303	1	7.3	83.8	8.9		254	CYT		35.843	9.44			0.771	3.298	0.007	gol		PF02485	Core-2/I-Branching enzyme	PTHR19297	5.9e-63	AgB01_g382_t02-IPRSCAN	IPR003406	Glycosyltransferase,family14	N	-100.67	-	No					-0.968908	0.00667333
382	AgB01_g383_t01	e3_ubiquitin-protein_ligase_ubr3	Unknown product	Unknown			M	116	0	1		1	0	ExpAA=0.81 First60=0.38 PredHel=0 Topology=o	116	0						CYT		13.503	6.39			0.923	6.415	0.013	cyt						AgB01_g383_t01-IPRSCAN			N	Too short sequence	-	No					-1.0109	0.00530798
383	AgB01_g384_t10	formin-like_protein	Rho GTPase effector BNI1	Signal Transduction	KOG	3e-40	M	1086	0	1		14	0	ExpAA=0.05 First60=0.00 PredHel=0 Topology=o	1086	0						CYT		121.591	6.63			0.201	0.395	0.001	nuc		PF06371; PF06371; PF02181; PF06367	Diaphanous GTPase-binding Domain; Diaphanous GTPase-binding Domain; Formin Homology 2 Domain; Diaphanous FH3 Domain	PTHR23213	6.1e-256	AgB01_g384_t10-IPRSCAN	IPR010473; IPR015425; IPR016024; IPR014768; IPR010472; IPR010472	Formin,GTPase-bindingdomain; Formin,FH2domain; Armadillo-typefold; RhoGTPase-binding/forminhomology3(GBD/FH3)domain; Formin,FH3domain	N	-146.59	-	No					-1.04126	0.00449768
384	AgB01_g385_t01	formin-like_protein	Conserved secreted protein precursor	Secreted / Uncharacterized	CDD	2e-83	M	149	0	1		8	0	ExpAA=0.16 First60=0.16 PredHel=0 Topology=o	149	0						SIG	19-20	16.245	6.15	13.899	5.83	0.583	1.337	0.003	exc		PF01681	C6 domain			AgB01_g385_t01-IPRSCAN	IPR002601; IPR002601	C6domain	N	Too short sequence	-	No					-1.01839	0.00509552
385	AgB01_g386_t01	protein_phosphatase_phlpp-like_protein	protein phosphatase phlpp-like protein - probable fragment	Signal Transduction	NR	0	M	538	0	0		14	0	ExpAA=0.18 First60=0.00 PredHel=0 Topology=o	538	0						CYT		61.459	7.2			0.291	0.543	0.001	nuc		PF13855	Leucine rich repeat	PTHR44125	3.4e-119	AgB01_g386_t01-IPRSCAN	IPR001611; IPR003591; IPR032675; IPR001611	Leucine-richrepeat; Leucine-richrepeat,typicalsubtype; Leucine-richrepeatdomainsuperfamily	N	-117.26	-	No					-0.961637	0.00694289
386	AgB01_g387_t04	Low_affinity_immunoglobulin_epsilon_Fc_receptor	low affinity immunoglobulin epsilon fc receptor - signalP detected	Immunologically Relevant / secreted / low	NR	2e-50	M	159	0	1	W(3.38)	7	0	ExpAA=0.03 First60=0.02 PredHel=0 Topology=o	159	0						SIG	19-20	18.467	6.98	16.311	6.56	0.61	1.421	0.003	exc		PF00059	Lectin C-type domain	PTHR22802	1e-22	AgB01_g387_t04-IPRSCAN	IPR016186; IPR016187; IPR001304; IPR001304	C-typelectin-like/linkdomainsuperfamily; C-typelectinfold; C-typelectin-like	N	Too short sequence	-	No					-1.00487	0.00548562
387	AgB01_g388_t01	hypothetical_protein	Unknown product	Unknown			M	211	0	0		4	0	ExpAA=0.02 First60=0.00 PredHel=0 Topology=o	211	0						CYT		23.936	5.12			0.458	0.926	0.002	nuc	LSSRFRK|QC 0.556 *ProP*					AgB01_g388_t01-IPRSCAN			N	-259.82	-	No					-0.952739	0.00728751
388	AgB01_g389_t01	Nucleoporin_seh1-A	nucleoporin seh1-a	Nuclear Export	NR	0	M	376	0	1	W(3.34)	8	0	ExpAA=0.01 First60=0.00 PredHel=0 Topology=o	376	0						CYT		42.438	7.67			0.447	0.859	0.002	cyt		PF00400; PF00400; PF00400	WD domain, G-beta repeat; WD domain, G-beta repeat; WD domain, G-beta repeat	PTHR11024	6.2e-126	AgB01_g389_t01-IPRSCAN	IPR001680; IPR037363; IPR037597; IPR017986; IPR036322; IPR019775; IPR015943	WD40repeat; Sec13/Seh1family; NucleoporinSeh1; WD40-repeat-containingdomain; WD40-repeat-containingdomainsuperfamily; WD40repeat,conservedsite; WD40/YVTNrepeat-like-containingdomainsuperfamily	N	-129.26	-	No					-0.950578	0.00737374
389	AgB01_g390_t01	hypothetical_protein	Unknown product	Unknown			F	104	0	0	Y(3.25)	4	0	ExpAA=0.00 First60=0.00 PredHel=0 Topology=i	104	0						CYT		12.515	8.37			0.832	4.048	0.008	mit						AgB01_g390_t01-IPRSCAN			N	Too short sequence	-	No					-1.01225	0.00526897
390	AgB01_g391_t01	hypothetical_protein	Unknown product	Unknown			D	117	0	0		1	0	ExpAA=0.00 First60=0.00 PredHel=0 Topology=o	117	0						CYT		13.342	10.6			0.803	3.469	0.007	nuc						AgB01_g391_t01-IPRSCAN			N	Too short sequence	-	No					-0.844928	0.0130852
391	AgB01_g392_t01	Small_G_protein_signaling_modulator_1,_partial	Small G protein signaling modulator 1 - probable fragment	Uncharacterized	NR	0	S	278	0	2		6	0	ExpAA=0.03 First60=0.00 PredHel=0 Topology=o	278	0						CYT		31.55	5.92			0.857	4.51	0.009	nuc				PTHR22957:SF355	2.8e-64	AgB01_g392_t01-IPRSCAN			N	-143.7	-	No					-0.95189	0.00732126
392	AgB01_g394_t01	Small_G_protein_signaling_modulator_1,_partial	Small G protein signaling modulator 1	Protein Export	NR	3e-83	C	271	0	2		6	0	ExpAA=0.35 First60=0.00 PredHel=0 Topology=o	271	0						CYT		30.29	9.28			0.542	1.161	0.002	nuc		PF02759	RUN domain			AgB01_g394_t01-IPRSCAN	IPR004012; IPR037213; IPR004012	RUNdomain; RUNdomainsuperfamily	N	-151.01	-	No					-0.990088	0.00594593
393	AgB01_g395_t05	Ankyrin-1	serine/threonine-protein phosphatase 6 regulatory ankyrin repeat subunit A-like partial - probable fragment - signalP detected - GPI anchored	Signal Transduction / GPI	REFSEQ-INVERTEBRATE	5e-27	M	856	0	0		25	0	ExpAA=1.24 First60=1.19 PredHel=0 Topology=o	856	0						SIG	19-20	94.701	8.83	92.803	8.85	0.396	0.735	0.001	mit	EKSRLKK|SN 0.749 *ProP* ; LLSRHER|DN 0.591 *ProP*	PF12796; PF12796; PF12796	Ankyrin repeats (3 copies); Ankyrin repeats (3 copies); Ankyrin repeats (3 copies)			AgB01_g395_t05-IPRSCAN	IPR020683; IPR036770; IPR002110; IPR002110	Ankyrinrepeat-containingdomain; Ankyrinrepeat-containingdomainsuperfamily; Ankyrinrepeat	Y	-156.92	-	No					-0.921645	0.0086306
394	AgB01_g396_t01	ankyrin-2	Unknown product	Unknown			M	108	0	0		2	0	ExpAA=3.11 First60=2.68 PredHel=0 Topology=i	108	0						ANC		13.201	11.08	9.791	10.64	0.715	2.425	0.005	mit						AgB01_g396_t01-IPRSCAN			N	Too short sequence	-	No					-1.0129	0.00525058
395	AgB01_g397_t02	hypothetical_protein	hypothetical secreted protein precursor	Secreted / Unknown			M	226	0	1		1	0	ExpAA=1.82 First60=1.82 PredHel=0 Topology=o	226	0						SIG	15-16	25.327	10.16	23.595	10.23	0.868	4.779	0.01	exc						AgB01_g397_t02-IPRSCAN			N	-239.56	-	No					-0.999344	0.00565334
396	AgB01_g398_t04	cre-snf-12_protein	Transporter - probable fragment - 2 predicted membrane helices	Transporters / membrane	NR	5e-33	M	398	0	3		5	0	ExpAA=45.23 First60=21.31 PredHel=2 Topology=i41-63o78-100i	398	2	11.1	3.8	85.2			CYT		44.773	8.8			0.246	0.471	0.001	nuc		PF00209	Sodium:neurotransmitter symporter family	PTHR11616	1.3e-27	AgB01_g398_t04-IPRSCAN	IPR000175; IPR037272; IPR000175	Sodium:neurotransmittersymporter; Sodium:neurotransmittersymportersuperfamily	N	-146.8	-	No					-0.888934	0.0103087
397	AgB01_g399_t02	Transporter	Unknown product - 2 predicted membrane helices	Unknown / membrane			M	199	0	1		3	0	ExpAA=16.89 First60=0.00 PredHel=1 Topology=i165-187o	199	1	11.1	6	82.9		12	CYT		21.996	5.42			0.631	2.01	0.004	cyt		PF00209	Sodium:neurotransmitter symporter family	PTHR11616:SF184	3.1e-16	AgB01_g399_t02-IPRSCAN	IPR000175; IPR037272; IPR000175	Sodium:neurotransmittersymporter; Sodium:neurotransmittersymportersuperfamily	N	Too short sequence	-	No					-0.93184	0.00816516
398	AgB01_g400_t02	trna_(guanine-n_-)-methyltransferase_subunit_trm82	trna (guanine-n -)-methyltransferase subunit trm82	Protein Synthesis	NR	0	M	434	0	1		13	0	ExpAA=0.08 First60=0.01 PredHel=0 Topology=o	434	0						CYT		48.328	6.57			0.292	0.544	0.001	cyt		PF00400	WD domain, G-beta repeat	PTHR16288	2e-70	AgB01_g400_t02-IPRSCAN	IPR001680; IPR028884; IPR019775; IPR017986; IPR015943	WD40repeat; tRNA(guanine-N(7)-)-methyltransferasenon-catalyticsubunit; WD40repeat,conservedsite; WD40-repeat-containingdomain; WD40/YVTNrepeat-like-containingdomainsuperfamily	N	-139.42	-	No					-0.912656	0.00906272
399	AgB01_g401_t05	N-alpha-acetyltransferase_15,_NatA_auxiliary_subunit	N-terminal acetyltransferase - probable fragment	Nuclear Regulation	KOG	0	M	439	0	0		5	0	ExpAA=0.09 First60=0.00 PredHel=0 Topology=o	439	0						CYT		51.771	9.11			0.368	0.691	0.001	cyt	RVMRVRR|RA 0.569 *ProP*	PF13414; PF12569	TPR repeat; NMDA receptor-regulated protein 1	PTHR22767:SF5	3e-195	AgB01_g401_t05-IPRSCAN	IPR011990; IPR019734; IPR013026; IPR021183; IPR019734	Tetratricopeptide-likehelicaldomainsuperfamily; Tetratricopeptiderepeat; Tetratricopeptiderepeat-containingdomain; N-terminalacetyltransferaseA,auxiliarysubunit	N	-197.4	-	No					-0.982613	0.00619316
400	AgB01_g402_t01	ES2-like_protein	Splicing factor ESS-2	Transcription Machinery	SWISSP	0	M	519	0	0		1	0	ExpAA=0.00 First60=0.00 PredHel=0 Topology=o	519	0						CYT		58.13	9.44			0.495	1.407	0.003	nuc	KRYRDKR|KA 0.679 *ProP*	PF09751	Nuclear protein Es2	PTHR12940	1.8e-116	AgB01_g402_t01-IPRSCAN	IPR019148; IPR019148	NuclearproteinDGCR14/ESS-2	N	-179.4	-	No					-0.914393	0.00897755
401	AgB01_g403_t04	Cell_division_protein_kinase_12	Cdc2-related protein kinase	Nuclear Regulation	KOG	0	M	894	0	4		8	0	ExpAA=0.00 First60=0.00 PredHel=0 Topology=o	894	0						CYT		98.464	10			0.595	2.005	0.004	nuc	RDARRRR|SR 0.722 *ProP* ; RSSKKRR|SP 0.547 *ProP* ; CSYRPKR|TY 0.561 *ProP*	PF00069; PF12330	Protein kinase domain; Haspin like kinase domain	PTHR24056:SF126	1.7e-183	AgB01_g403_t04-IPRSCAN	IPR000719; IPR011009; IPR017441; IPR008271; IPR000719	Proteinkinasedomain; Proteinkinase-likedomainsuperfamily; Proteinkinase,ATPbindingsite; Serine/threonine-proteinkinase,activesite	N	-54.48	-	No	309	1.2e-89	0.925165	CMGC/CDK/CRK7 protein kinase	-0.947405	0.00750219
402	AgB01_g404_t01	hypothetical_protein	Unknown product	Unknown			M	194	0	1		1	0	ExpAA=0.00 First60=0.00 PredHel=0 Topology=o	194	0						CYT		21.946	9.47			0.949	7.121	0.014	nuc						AgB01_g404_t01-IPRSCAN			N	Too short sequence	-	No					-0.933301	0.00810055
403	AgB01_g405_t02	Probable_mitochondrial_pyruvate_carrier_1	mitochondrial pyruvate carrier 2 - probable fragment	Energy Metabolism	NR	3e-63	M	135	0	2		2	0	ExpAA=30.82 First60=20.67 PredHel=0 Topology=o	135	0						CYT		15.57	9.3			0.911	6.104	0.012	mit		PF03650	Uncharacterised protein family (UPF0041)	PTHR14154	1.4e-48	AgB01_g405_t02-IPRSCAN	IPR005336	Mitochondrialpyruvatecarrier	N	Too short sequence	-	No					-0.819241	0.0150348
404	AgB01_g406_t03	Coronin-like_protein_cor-1	Tumor-specific antigen (contains WD repeats) - probable fragment	Cytoskeletal	KOG	7e-65	M	603	0	0		9	0	ExpAA=0.18 First60=0.17 PredHel=0 Topology=o	603	0						CYT		68.19	7.24			0.617	1.505	0.003	nuc	TPQRSPR|ID 0.616 *ProP* ; LRSRSDR|DD 0.776 *ProP*	PF08953; PF00400; PF00400; PF16300	Domain of unknown function (DUF1899); WD domain, G-beta repeat; WD domain, G-beta repeat; Type of WD40 repeat	PTHR10856:SF36	4.4e-205	AgB01_g406_t03-IPRSCAN	IPR015048; IPR015943; IPR001680; IPR017986; IPR015505	DomainofunknownfunctionDUF1899; WD40/YVTNrepeat-like-containingdomainsuperfamily; WD40repeat; WD40-repeat-containingdomain; Coronin	N	-138.46	-	No					-0.952809	0.00728472
405	AgB01_g407_t04	H/ACA_ribonucleoprotein_complex_subunit_4	mRNA pseudouridine synthesis - box H/ACA snoRNP complex - snRNA pseudouridine synthesis - rRNA pseudouridine synthesis -	Transcription Machinery	GO	0	M	450	0	1		8	0	ExpAA=0.87 First60=0.00 PredHel=0 Topology=o	450	0						CYT		50.561	9.16			0.154	0.32	0.001	nuc		PF16198; PF01509; PF01472; PF08068	tRNA pseudouridylate synthase B C-terminal domain; TruB family pseudouridylate synthase (N terminal domain); PUA domain; DKCLD (NUC011) domain	PTHR23127	4.8e-232	AgB01_g407_t04-IPRSCAN	IPR032819; IPR002501; IPR002478; IPR004802; IPR020103; IPR015947; IPR012960; IPR004521; IPR004802	tRNApseudouridylatesynthaseB,C-terminal; PseudouridinesynthaseII,N-terminal; PUAdomain; tRNApseudouridinesynthaseBfamily; Pseudouridinesynthase,catalyticdomainsuperfamily; PUA-likesuperfamily; Dyskerin-like; UncharacteriseddomainCHP00451	N	-149.55	-	No					-0.982797	0.00618698
406	AgB01_g408_t01	gtp-binding_nuclear_protein_ran	Unknown product	Unknown			M	101	0	0	H(3.97)	1	0	ExpAA=0.09 First60=0.09 PredHel=0 Topology=i	101	0						CYT		11.852	9.57			0.862	4.629	0.009	nuc						AgB01_g408_t01-IPRSCAN			N	Too short sequence	-	No					-1.00923	0.00535662
407	AgB01_g409_t01	GTP-binding_nuclear_protein_Ran	GTPase Ran/TC4/GSP1 (nuclear protein transport pathway) small G protein superfamily	Protein Export	KOG	0	M	216	0	2		3	0	ExpAA=0.04 First60=0.00 PredHel=0 Topology=o	216	0						CYT		24.35	6.52			0.487	0.973	0.002	cyt		PF00071	Ras family	PTHR24071:SF15	7.2e-130	AgB01_g409_t01-IPRSCAN	IPR005225; IPR002041; IPR001806; IPR027417	SmallGTP-bindingproteindomain; RanGTPase; SmallGTPasesuperfamily; P-loopcontainingnucleosidetriphosphatehydrolase	N	-211.16	-	No					-0.989602	0.0059617
408	AgB01_g410_t04	protein_tumorous_imaginal	Mitochondrial protein	Energy Metabolism	NR	0	M	575	0	0		9	0	ExpAA=18.48 First60=0.00 PredHel=1 Topology=o554-572i	575	1	3.1	96.3	0.5	1	3	CYT		66.499	6.28			0.272	0.509	0.001	nuc	TRRRRPR|HH 0.597 *ProP*	PF00226	DnaJ domain	PTHR44145:SF3	1.8e-26	AgB01_g410_t04-IPRSCAN	IPR029071; IPR001623; IPR036869; IPR036869	Ubiquitin-likedomainsuperfamily; DnaJdomain; ChaperoneJ-domainsuperfamily	N	-183.41	-	No					-0.889324	0.0102869
409	AgB01_g411_t02	Protein_tumorous_imaginal_disc	Mitochondrial protein - probable fragment	Energy Metabolism	NR	3e-75	V	183	0	0		2	0	ExpAA=0.00 First60=0.00 PredHel=0 Topology=o	183	0						CYT		21.307	9.32			0.874	5.004	0.01	nuc	TRRRRPR|HH 0.597 *ProP*	PF00226	DnaJ domain	PTHR44145:SF3	9.5e-28	AgB01_g411_t02-IPRSCAN	IPR001623; IPR036869; IPR001623	DnaJdomain; ChaperoneJ-domainsuperfamily	N	Too short sequence	-	No					-0.958817	0.00705031
410	AgB01_g412_t04	f-box_domain_containing_protein	Unknown product	Unknown			M	360	0	1		11	0	ExpAA=0.60 First60=0.00 PredHel=0 Topology=o	360	0						CYT		41.706	5.83			0.367	0.683	0.001	cyt						AgB01_g412_t04-IPRSCAN			N	-142.81	-	No					-0.956702	0.00713197
411	AgB01_g413_t02	sperm-specific_protein	sperm-specific protein - probable fragment	Uncharacterized	NR	9e-47	M	109	0	1		1	0	ExpAA=0.00 First60=0.00 PredHel=0 Topology=o	109	0						CYT		11.802	5.06			0.276	0.517	0.001	cyt		PF00635	MSP (Major sperm protein) domain	PTHR22947	1.1e-31	AgB01_g413_t02-IPRSCAN	IPR013783; IPR008962; IPR000535; IPR000535	Immunoglobulin-likefold; PapD-likesuperfamily; Majorspermprotein(MSP)domain	N	Too short sequence	-	No					-0.975715	0.00643039
412	AgB01_g414_t01	Developmentally-regulated_GTP-binding_protein_1,_partial	GTP-binding protein DRG2 (ODN superfamily)	Signal Transduction	KOG	0	M	366	0	0		6	0	ExpAA=0.16 First60=0.00 PredHel=0 Topology=o	366	0						CYT		40.679	8.98			0.417	0.801	0.002	mit		PF02824; PF16897; PF01926	TGS domain; C-terminal region of MMR_HSR1 domain; 50S ribosome-binding GTPase	PTHR43127	1.4e-209	AgB01_g414_t01-IPRSCAN	IPR004095; IPR031167; IPR006074; IPR005225; IPR027417; IPR012675; IPR012676; IPR031662; IPR006073; IPR006073	TGS; OBG-typeguaninenucleotide-binding(G)domain; GTP1/OBG,conservedsite; SmallGTP-bindingproteindomain; P-loopcontainingnucleosidetriphosphatehydrolase; Beta-graspdomainsuperfamily; TGS-like; GTPbindingprotein,seconddomain; GTPbindingdomain	N	-194.78	-	No					-0.983366	0.00616782
413	AgB01_g415_t03	PX_domain-containing_protein_kinase-like_protein	PX domain-containing protein kinase-like protein - 2 predicted membrane helices	Signal Transduction / membrane	NR	0	M	358	0	0		13	0	ExpAA=21.04 First60=0.00 PredHel=1 Topology=i100-122o	358	1	6.1	65.9	27.9		236	CYT		40.769	6.98			0.761	3.2	0.006	mit		PF00787	PX domain	PTHR22999	1.1e-59	AgB01_g415_t03-IPRSCAN	IPR036871; IPR001683; IPR011009; IPR001683	PXdomainsuperfamily; Phoxhomologousdomain; Proteinkinase-likedomainsuperfamily	N	-122.33	-	No					-0.980402	0.00626825
414	AgB01_g416_t01	Golgin-45	golgin-45	Protein Export	NR	0	M	314	0	0		9	0	ExpAA=0.02 First60=0.02 PredHel=0 Topology=o	314	0						CYT		34.524	7.57			0.731	2.471	0.005	nuc				PTHR13066	3.2e-37	AgB01_g416_t01-IPRSCAN	IPR027095; IPR027095	Golgin-45	N	-165.91	-	No					-0.937432	0.00792052
415	AgB01_g417_t01	hypothetical_protein	catalytic step 2 spliceosome - exon-exon junction complex - membrane - nucleoplasm	Transcription Machinery	GO	2e-09	M	503	0	1		5	0	ExpAA=0.00 First60=0.00 PredHel=0 Topology=o	503	0						CYT		56.622	6.06			0.159	0.323	0.001	nuc	QSRRGKR|TM 0.650 *ProP*					AgB01_g417_t01-IPRSCAN			N	-185.77	-	No					-0.882813	0.0106568
416	AgB01_g418_t03	Protein_disulfide-isomerase_2	Protein disulfide-isomerase 2 - 3 predicted membrane helices	Post-translational Modifications / membrane	NR	0	M	504	0	1	K(3.18)	5	0	ExpAA=36.44 First60=2.12 PredHel=2 Topology=o59-81i88-105o	504	2	7.7	90.9	1.4			CYT		58.692	9.02			0.066	0.154	0	nuc		PF00085; PF13848	Thioredoxin; Thioredoxin-like domain	PTHR18929	1.2e-57	AgB01_g418_t03-IPRSCAN	IPR013766; IPR036249; IPR013766	Thioredoxindomain; Thioredoxin-likesuperfamily	N	-129.62	-	No					-0.956831	0.00712697
417	AgB01_g419_t02	Kelch-like_protein_18	Protein containing BTB/POZ and Kelch - GPI anchored	Signal Transduction / GPI	KOG	0	M	588	0	4		17	0	ExpAA=14.56 First60=0.13 PredHel=0 Topology=o	588	0						CYT		65.83	5.62			0.657	1.715	0.003	cyt		PF00651; PF07707; PF01344; PF01344; PF01344; PF01344; PF01344; PF01344	BTB/POZ domain; BTB And C-terminal Kelch; Kelch motif; Kelch motif; Kelch motif; Kelch motif; Kelch motif; Kelch motif	PTHR24412	1.4e-243	AgB01_g419_t02-IPRSCAN	IPR000210; IPR015915; IPR011705; IPR006652; IPR017096; IPR011333	BTB/POZdomain; Kelch-typebetapropeller; BTB/Kelch-associated; Kelchrepeattype1; BTB-kelchprotein; SKP1/BTB/POZdomainsuperfamily	Y	-106.39	-	No					-0.945656	0.00757393
418	AgB01_g420_t01	Kelch-like_protein_18	Unknown product	Unknown			M	114	0	0		8	0	ExpAA=31.77 First60=11.45 PredHel=1 Topology=o63-85i	114	1	19.3	55.3	25.4		29	CYT		13.349	9.2			0.147	0.293	0.001	mit						AgB01_g420_t01-IPRSCAN			N	Too short sequence	-	No					-0.84878	0.0128153
419	AgB01_g421_t03	hypothetical_protein	Unknown product	Unknown			M	365	0	1		14	0	ExpAA=0.43 First60=0.04 PredHel=0 Topology=o	365	0						CYT		41.97	6.2			0.544	1.161	0.002	cyt						AgB01_g421_t03-IPRSCAN			N	-126.49	-	No					-0.924123	0.00851509
420	AgB01_g422_t02	40S_ribosomal_protein_S12	40s ribosomal protein s12	Protein Synthesis	NR	3e-73	M	140	0	0		6	0	ExpAA=0.00 First60=0.00 PredHel=0 Topology=o	140	0						CYT		15.549	6.14			0.625	1.702	0.003	cyt		PF01248	Ribosomal protein L7Ae/L30e/S12e/Gadd45 family	PTHR11843:SF0	1.1e-57	AgB01_g422_t02-IPRSCAN	IPR029064; IPR004038; IPR000530; IPR000530	50SribosomalproteinL30e-like; RibosomalproteinL7Ae/L30e/S12e/Gadd45; RibosomalproteinS12e	N	Too short sequence	-	No					-0.94703	0.00751749
421	AgB01_g423_t05	Adenosine_3'-phospho_5'-phosphosulfate_transporter_2	Adenosine 3'-phospho 5'-phosphosulfate transporter 2 - 9 predicted membrane helices	Transporters / membrane	NR	0	M	361	0	1		4	0	ExpAA=191.25 First60=21.09 PredHel=9 Topology=o33-55i68-87o102-124i152-171o186-203i216-238o253-275i280-302o307-326i	361	9	51	23	26			CYT		40.665	9.49			0.253	0.569	0.001	end		PF08449	UAA transporter family	PTHR10778:SF8	1.3e-107	AgB01_g423_t05-IPRSCAN	IPR013657	UAAtransporter	N	-48.74	-	No					-0.993947	0.00582215
422	AgB01_g424_t01	Calcipressin-like_protein	Calcineurin-mediated signaling pathway inhibitor DSCR1	Signal Transduction	KOG	2e-43	M	208	0	0		2	0	ExpAA=0.01 First60=0.00 PredHel=0 Topology=o	208	0						CYT		23.428	5.06			0.385	0.722	0.001	cyt		PF04847	Calcipressin	PTHR10300	2.8e-53	AgB01_g424_t01-IPRSCAN	IPR006931; IPR012677; IPR035979; IPR006931	Calcipressin; Nucleotide-bindingalpha-betaplaitdomainsuperfamily; RNA-bindingdomainsuperfamily	N	-254.65	-	No					-0.985784	0.00608706
423	AgB01_g425_t01	Calcipressin-like_protein	Unknown product - 2 predicted membrane helices	Unknown / membrane			M	97	1.03093	0	X(151.81)	4	1.03093	ExpAA=38.76 First60=25.05 PredHel=2 Topology=i21-43o58-75i	97	2	40.2	15.5	44.3			CYT		10.824	9.69			0.152	0.31	0.001	nuc						AgB01_g425_t01-IPRSCAN			N	Too short sequence	-	No					-0.824425	0.0146195
424	AgB01_g426_t01	serine_threonine-protein_kinase	serine threonine-protein kinase	Signal Transduction	NR	0	M	488	0	0		8	0	ExpAA=0.08 First60=0.00 PredHel=0 Topology=o	488	0						CYT		56.19	9.41			0.551	1.189	0.002	nuc		PF00069	Protein kinase domain	PTHR24055	2.4e-170	AgB01_g426_t01-IPRSCAN	IPR000719; IPR003527; IPR011009; IPR017441; IPR008271; IPR000719	Proteinkinasedomain; Mitogen-activatedprotein(MAP)kinase,conservedsite; Proteinkinase-likedomainsuperfamily; Proteinkinase,ATPbindingsite; Serine/threonine-proteinkinase,activesite	N	-152.38	-	No	297	4.8e-86	0.879124	CMGC/MAPK protein kinase	-1.01717	0.00512953
425	AgB01_g427_t04	Ubiquitin-40S_ribosomal_protein_S27a	Ubiquitin-40S ribosomal protein S27a	Proteasome	NR	1e-86	M	162	0	1	K(3.22)	4	0	ExpAA=0.00 First60=0.00 PredHel=0 Topology=o	162	0						CYT		18.479	9.94			0.85	1.401	0.003	nuc		PF00240; PF01599	Ubiquitin family; Ribosomal protein S27a	PTHR10666	5.1e-89	AgB01_g427_t04-IPRSCAN	IPR000626; IPR002906; IPR019954; IPR038582; IPR019956; IPR029071; IPR011332	Ubiquitindomain; RibosomalproteinS27a; Ubiquitinconservedsite; S27a-likesuperfamily; Ubiquitin; Ubiquitin-likedomainsuperfamily; Zinc-bindingribosomalprotein	N	Too short sequence	-	No					-0.990976	0.00591722
426	AgB01_g428_t01	hypothetical_protein	Unknown product - 3 predicted membrane helices	Unknown / membrane			M	109	0	0		4	0	ExpAA=45.73 First60=29.45 PredHel=2 Topology=o20-42i55-77o	109	2	40.4	47.7	11.9			BL/ANC		12.062	5.8			0.721	2.968	0.006	end						AgB01_g428_t01-IPRSCAN			N	Too short sequence	-	No					-0.954975	0.00719935
427	AgB01_g429_t02	putative_tyrosine-protein_kinase_kin-31	tyrosine-protein kinase kin-31	Signal Transduction	NR	0	M	446	0	2		3	0	ExpAA=0.00 First60=0.00 PredHel=0 Topology=o	446	0						CYT		50.476	9.39			0.195	0.387	0.001	cyt		PF00017; PF07714	SH2 domain; Protein tyrosine kinase	PTHR24418:SF211	8.5e-143	AgB01_g429_t02-IPRSCAN	IPR011009; IPR008266; IPR001245; IPR035849; IPR000719; IPR000980; IPR017441; IPR020635; IPR036860; IPR001245	Proteinkinase-likedomainsuperfamily; Tyrosine-proteinkinase,activesite; Serine-threonine/tyrosine-proteinkinase,catalyticdomain; Fes/Fps/Fer,SH2domain; Proteinkinasedomain; SH2domain; Proteinkinase,ATPbindingsite; Tyrosine-proteinkinase,catalyticdomain; SH2domainsuperfamily	N	-175.45	-	No	174.1	4.9e-49	0.832491	TK/FER protein kinase	-0.916867	0.00885765
428	AgB01_g430_t02	zinc_c2h2_type_family_protein	Unknown product	Unknown			M	181	0	1	W(3.96)	1	0	ExpAA=13.33 First60=13.33 PredHel=0 Topology=o	181	0						CYT		21.088	5.2			0.823	3.799	0.008	nuc	WYRRVAR|EA 0.517 *ProP*					AgB01_g430_t02-IPRSCAN			N	Too short sequence	-	No					-0.977462	0.00636947
429	AgB01_g431_t01	zinc_c2h2_type_family_protein	Unknown product	Unknown			M	95	0	0		5	0	ExpAA=9.63 First60=9.63 PredHel=0 Topology=o	95	0						CYT		10.723	10.15			0.928	6.462	0.013	mit						AgB01_g431_t01-IPRSCAN			N	Too short sequence	-	No					-0.939041	0.00785152
430	AgB01_g432_t01	hypothetical_protein	Unknown product - 2 predicted membrane helices - GPI anchored	Unknown / membrane / GPI			M	99	0	1	F(4.78)	6	0	ExpAA=52.55 First60=29.04 PredHel=2 Topology=i12-34o73-95i	99	2	44.4	39.4	16.2	1	4	BL/ANC		11.474	7.63			0.866	4.928	0.01	nuc						AgB01_g432_t01-IPRSCAN			Y	Too short sequence	-	No					-0.971186	0.00659101
431	AgB01_g433_t01	hypothetical_protein	Unknown product	Unknown			G	106	0	0	I(3.8)	4	0	ExpAA=6.97 First60=6.81 PredHel=0 Topology=o	106	0						CYT		12.14	5.77			0.66	1.708	0.003	cyt						AgB01_g433_t01-IPRSCAN			N	Too short sequence	-	No					-0.845336	0.0130564
432	AgB01_g434_t01	hypothetical_protein	Unknown product	Unknown			M	159	0	0	I(3.52)	8	0	ExpAA=3.88 First60=0.63 PredHel=0 Topology=o	159	0						CYT		18.583	4.71			0.79	2.996	0.006	cyt						AgB01_g434_t01-IPRSCAN			N	Too short sequence	-	No					-0.747262	0.0221495
433	AgB01_g435_t01	iron-sulfur_cluster_assembly_1	Unknown product - GPI anchored	Unknown / GPI			M	65	0	0	M(3.01)	1	0	ExpAA=0.78 First60=0.71 PredHel=0 Topology=o	65	0						CYT		7.721	9.58			0.683	2.245	0.004	mit						AgB01_g435_t01-IPRSCAN			Y	Too short sequence	-	No					-1.00123	0.00559541
434	AgB01_g436_t01	Iron-sulfur_cluster_assembly_1	Iron-sulfur cluster assembly 1 homolog mitochondrial	Energy Metabolism	SWISSP	3e-44	M	269	0	0		7	0	ExpAA=0.01 First60=0.00 PredHel=0 Topology=o	269	0						CYT		29.974	9.27			0.794	3.117	0.006	nuc	GNKRARR|FG 0.524 *ProP*	PF01521; PF06003	Iron-sulphur cluster biosynthesis; Survival motor neuron protein (SMN)	PTHR10072	1.4e-52	AgB01_g436_t01-IPRSCAN	IPR000361; IPR010304; IPR017870; IPR035903; IPR002999; IPR016092	FeSclusterbiogenesis; Survivalmotorneuron; FeSclusterinsertion,C-terminal,conservedsite; HesB-likedomainsuperfamily; Tudordomain; FeSclusterinsertionprotein	N	-181.93	-	No					-0.960104	0.00700107
435	AgB01_g437_t01	Iron-sulfur_cluster_assembly_1	Unknown product	Unknown			L	158	0	1		2	0	ExpAA=0.60 First60=0.60 PredHel=0 Topology=o	158	0						CYT		17.692	9.36			0.877	5.173	0.01	nuc		PF08585	RecQ mediated genome instability protein	PTHR13681	1.2e-29	AgB01_g437_t01-IPRSCAN	IPR013894	RecQmediatedgenomeinstabilityprotein,N-terminal	N	Too short sequence	-	No					-1.00606	0.00545013
436	AgB01_g438_t01	cysteine_proteinase	Unknown product	Unknown			M	85	0	0		2	0	ExpAA=0.00 First60=0.00 PredHel=0 Topology=o	85	0						CYT		9.577	7.84			0.912	6.131	0.012	nuc	ERNGEKR|DI 0.529 *ProP*					AgB01_g438_t01-IPRSCAN			N	Too short sequence	-	No					-0.992154	0.00587934
437	AgB01_g439_t01	hypothetical_protein	Unknown product	Unknown			M	50	0	1	W(3.59)	1	0	ExpAA=0.31 First60=0.31 PredHel=0 Topology=o	50	0						CYT		5.704	4.87			0.868	5.202	0.01	mit						AgB01_g439_t01-IPRSCAN			N	Too short sequence	-	No					-0.999519	0.00564795
438	AgB01_g440_t01	hypothetical_protein	Unknown product	Unknown			M	49	0	0		1	0	ExpAA=0.00 First60=0.00 PredHel=0 Topology=o	49	0						CYT		6.012	9.52			0.837	3.906	0.008	nuc						AgB01_g440_t01-IPRSCAN			N	Too short sequence	-	No					-1.01113	0.0053015
439	AgB01_g441_t01	hypothetical_protein	Unknown product	Unknown			F	434	0	0		10	0	ExpAA=0.00 First60=0.00 PredHel=0 Topology=o	434	0						CYT		48.775	5.48			0.306	0.57	0.001	nuc				PTHR36947	5.5e-13	AgB01_g441_t01-IPRSCAN			N	-142.44	-	No					-0.960134	0.00699993
440	AgB01_g442_t01	cuticlin-1	cuticlin-1	Uncharacterized	NR	0	G	293	0	0		12	0	ExpAA=6.60 First60=0.13 PredHel=0 Topology=o	293	0						CYT		33.193	6.38			0.5	1.012	0.002	cyt				PTHR22907	2.7e-58	AgB01_g442_t01-IPRSCAN	IPR001507; IPR001507	Zonapellucidadomain	N	-134.7	-	No					-0.966449	0.00676329
441	AgB01_g443_t02	Cuticlin-1	Conserved plasma membrane protein - 3 predicted membrane helices	Uncharacterized / membrane	CDD	0	M	406	0	2		14	0	ExpAA=62.78 First60=20.59 PredHel=3 Topology=o4-26i114-136o377-399i	406	3	16.3	60.3	23.4			BL	25-26	44.934	5.76	42.15	5.77	0.602	1.798	0.004	cyt	SCGRSKR|EA 0.760 *ProP*			PTHR22907	2.3e-77	AgB01_g443_t02-IPRSCAN	IPR001507; IPR001507	Zonapellucidadomain	N	-120.43	-	No					-0.958677	0.00705569
442	AgB01_g444_t01	hypothetical_protein	Unknown product	Unknown			M	228	0	1		16	0	ExpAA=16.00 First60=6.68 PredHel=1 Topology=o51-73i	228	1	9.6	22.4	68		155	CYT		25.753	9.13			0.335	0.663	0.001	nuc						AgB01_g444_t01-IPRSCAN			N	-233.6	-	No					-0.927347	0.00836711
443	AgB01_g445_t01	hypothetical_protein	Unknown product	Unknown			M	85	0	0	F(3.9)	3	0	ExpAA=1.33 First60=1.04 PredHel=0 Topology=o	85	0						CYT		10.081	10.58			0.795	3.285	0.007	cyt						AgB01_g445_t01-IPRSCAN			N	Too short sequence	-	No					-1.00074	0.00561038
444	AgB01_g446_t05	hypothetical_protein	Unknown product - 4 predicted membrane helices	Unknown / membrane			M	367	0	0		6	0	ExpAA=85.69 First60=9.23 PredHel=4 Topology=i52-74o79-96i109-128o143-165i	367	4	21.8	5.4	72.8			CYT		41.778	9.86			0.706	2.586	0.005	nuc						AgB01_g446_t05-IPRSCAN			N	-101.94	-	No					-0.962136	0.00692404
445	AgB01_g447_t01	hypothetical_protein	Unknown product	Unknown			M	78	0	0	F(4.25)	5	0	ExpAA=1.42 First60=1.39 PredHel=0 Topology=o	78	0						CYT		9.477	9.47			0.855	4.497	0.009	mit						AgB01_g447_t01-IPRSCAN			N	Too short sequence	-	No					-0.99414	0.00581604
446	AgB01_g448_t01	hypothetical_protein	Unknown product	Unknown			M	73	0	0		2	0	ExpAA=0.14 First60=0.11 PredHel=0 Topology=o	73	0						CYT		8.163	11.62			0.863	4.937	0.01	mit						AgB01_g448_t01-IPRSCAN			N	Too short sequence	-	No					-0.902856	0.00955825
447	AgB01_g449_t05	Casein_kinase_I_isoform_delta-A	Casein kinase 1-like protein 6 - probable fragment	Signal Transduction	SWISSP	1e-64	M	643	0	1		12	0	ExpAA=0.00 First60=0.00 PredHel=0 Topology=o	643	0						CYT		71.626	6.82			0.508	2.471	0.005	nuc		PF00069	Protein kinase domain	PTHR11909	5.1e-84	AgB01_g449_t05-IPRSCAN	IPR000719; IPR008271; IPR011009	Proteinkinasedomain; Serine/threonine-proteinkinase,activesite; Proteinkinase-likedomainsuperfamily	N	-124.52	-	No	24.5	3.8e-10	0.681782	CK1/CK1/CK1-D protein kinase	-0.985782	0.00608712
448	AgB01_g450_t04	photosystem_i_biogenesis_protein	uncharacterized protein F13E9.13 mitochondrial isoform X1	Energy Metabolism	REFSEQ-INVERTEBRATE	3e-60	M	220	0	0		6	0	ExpAA=0.23 First60=0.18 PredHel=0 Topology=o	220	0						CYT		23.867	6.7			0.63	0.551	0.001	cyt		PF03437	BtpA family	PTHR21381	7.7e-78	AgB01_g450_t04-IPRSCAN	IPR005137; IPR013785; IPR011060	Membranecomplexbiogenesisprotein,BtpAfamily; Aldolase-typeTIMbarrel; Ribulose-phosphatebindingbarrel	N	-211.06	-	No					-0.995596	0.00577004
449	AgB01_g451_t01	photosystem_i_biogenesis_protein	Unknown product - signalP detected - 2 predicted membrane helices - GPI anchored	Unknown / membrane / GPI			M	90	0	0	C(6.08)	13	0	ExpAA=39.19 First60=20.87 PredHel=2 Topology=i2-21o55-77i	90	2	45.6	37.8	16.7		13	SIG	17-18	10.071	6.48	8.275	6.69	0.264	3.635	0.007	end						AgB01_g451_t01-IPRSCAN			Y	Too short sequence	-	No					-0.675667	0.0324536
450	AgB01_g452_t05	MSP-domain_protein_4	Conserved secreted protein precursor - GPI anchored	Secreted / Uncharacterized / GPI	CDD	0	M	230	0	1		3	0	ExpAA=6.42 First60=6.41 PredHel=0 Topology=o	230	0						SIG	24-25	24.763	9.93	22.204	10.06	0.672	4.197	0.008	nuc	KGSRSPR|KI 0.522 *ProP*	PF00635	MSP (Major sperm protein) domain	PTHR22947	5.5e-41	AgB01_g452_t05-IPRSCAN	IPR000535; IPR013783; IPR008962	Majorspermprotein(MSP)domain; Immunoglobulin-likefold; PapD-likesuperfamily	Y	-214.73	-	No					-0.915304	0.00893323
451	AgB01_g453_t05	tribbles-like_protein_2	Serine/threonine protein kinase - probable fragment	Signal Transduction	KOG	1e-35	K	571	0	0		13	0	ExpAA=0.26 First60=0.00 PredHel=0 Topology=o	571	0						CYT		63.834	6.43			0.391	0.273	0.001	cyt		PF00069	Protein kinase domain	PTHR22961	2.7e-76	AgB01_g453_t05-IPRSCAN	IPR024104; IPR000719; IPR011009; IPR000719	Pseudokinasetribblesfamily/serine-threonine-proteinkinase40; Proteinkinasedomain; Proteinkinase-likedomainsuperfamily	N	-104.2	-	No	37.1	5.6e-11	0.608535	CAMK/TRBL protein kinase	-0.987392	0.00603396
452	AgB01_g454_t01	hypothetical_protein	Unknown product - signalP detected - 2 predicted membrane helices	Unknown / membrane			M	106	0	0		3	0	ExpAA=42.40 First60=19.93 PredHel=2 Topology=i25-47o67-89i	106	2	41.5	18.9	39.6			SIG	37-38	12.283	9.6	7.923	8.74	0.327	0.7	0.001	mit						AgB01_g454_t01-IPRSCAN			N	Too short sequence	-	No					-0.901304	0.00963915
453	AgB01_g455_t06	Endoplasmic_reticulum-Golgi_intermediate_compartment_protein_3	endoplasmic reticulum-golgi intermediate compartment protein 3	Post-translation Modification	NR	0	M	338	0	1		8	0	ExpAA=19.82 First60=19.76 PredHel=1 Topology=i21-43o	338	1	6.5	87.3	6.2		295	BL/ANC		37.564	5.26			0.816	3.851	0.008	mit		PF07970; PF13850	Endoplasmic reticulum vesicle transporter; Endoplasmic Reticulum-Golgi Intermediate Compartment (ERGIC)	PTHR10984:SF39	5.8e-99	AgB01_g455_t06-IPRSCAN	IPR012936	Endoplasmicreticulumvesicletransporter,C-terminal	N	-130.63	-	No					-0.920949	0.00866327
454	AgB01_g456_t01	Endoplasmic_reticulum-Golgi_intermediate_compartment_protein_3	Unknown product	Unknown			M	97	0	0		5	0	ExpAA=14.17 First60=5.44 PredHel=0 Topology=i	97	0						CYT		11.173	9.35			0.23	0.447	0.001	cyt						AgB01_g456_t01-IPRSCAN			N	Too short sequence	-	No					-1.02471	0.00492287
455	AgB01_g457_t01	Endoplasmic_reticulum-Golgi_intermediate_compartment_protein_3	Unknown product - 2 predicted membrane helices	Unknown / membrane			M	95	0	0		4	0	ExpAA=43.33 First60=20.83 PredHel=2 Topology=i37-59o63-85i	95	2	46.3	4.2	49.5			ANC		11.123	8.82	7.907	8.99	0.473	1.428	0.003	mit						AgB01_g457_t01-IPRSCAN			N	Too short sequence	-	No					-0.878468	0.010911
456	AgB01_g458_t01	Carrier_2	Mitochondrial carrier -like protein 2 - probable fragment - 2 predicted membrane helices	Energy Metabolism / membrane	NR	0	M	209	0	0		2	0	ExpAA=23.55 First60=2.89 PredHel=1 Topology=i93-115o	209	1	10.5	45	44.5		94	CYT		23.099	9.16			0.956	7.151	0.014	mit	GRTRGRR|YC 0.564 *ProP* ; SARRLLR|SA 0.536 *ProP*			PTHR10780:SF18	1.9e-23	AgB01_g458_t01-IPRSCAN	IPR018108; IPR023395; IPR018108	Mitochondrialsubstrate/solutecarrier; Mitochondrialcarrierdomainsuperfamily	N	-211.22	-	No					-1.00392	0.0055139
457	AgB01_g459_t02	hypothetical_protein	Cell wall protein IFF6 - probable fragment - GPI anchored	Extracellular Matrix / GPI	SWISSP	2e-12	M	1126	0	3		9	0	ExpAA=22.88 First60=0.00 PredHel=1 Topology=o1103-1125i	1126	1	2	98	0.1	1	1	CYT		122.502	6.75			0.225	0.434	0.001	nuc				PTHR23188	1.1e-41	AgB01_g459_t02-IPRSCAN	IPR007133; IPR027417	RNApolymeraseIIassociatedfactorPaf1; P-loopcontainingnucleosidetriphosphatehydrolase	Y	-105.54	-	No					-0.96446	0.00683697
458	AgB01_g460_t02	Heterogeneous_nuclear_ribonucleoprotein_Q	Unknown product	Unknown			M	94	0	0	W(3.81)	3	0	ExpAA=0.01 First60=0.01 PredHel=0 Topology=o	94	0						CYT		11.101	10.15			0.902	5.786	0.012	nuc						AgB01_g460_t02-IPRSCAN			N	Too short sequence	-	No					-0.982914	0.00618301
459	AgB01_g461_t01	Heterogeneous_nuclear_ribonucleoprotein_Q,_partial	Heterogeneous nuclear ribonucleoprotein R (RRM superfamily) - probable fragment	Transcription Machinery	KOG	2e-44	M	261	0	2		1	0	ExpAA=0.00 First60=0.00 PredHel=0 Topology=o	261	0						CYT		29.023	4.81			0.565	1.374	0.003	cyt		PF00076	RNA recognition motif. (a.k.a. RRM, RBD, or RNP domain)	PTHR44088	1.6e-90	AgB01_g461_t01-IPRSCAN	IPR000504; IPR035979; IPR012677	RNArecognitionmotifdomain; RNA-bindingdomainsuperfamily; Nucleotide-bindingalpha-betaplaitdomainsuperfamily	N	-226.79	-	No					-0.911709	0.00910943
460	AgB01_g462_t02	hypothetical_protein	Unknown product	Unknown			M	303	0	1		5	0	ExpAA=0.00 First60=0.00 PredHel=0 Topology=o	303	0						CYT		33.929	5.71			0.566	1.223	0.002	nuc	FRMRIKK|SS 0.626 *ProP*			PTHR31327:SF3	5.3e-35	AgB01_g462_t02-IPRSCAN	IPR036034	PDZsuperfamily	N	-181.42	-	No					-0.999556	0.00564681
461	AgB01_g463_t04	Tau-tubulin_kinase_2	tau-tubulin kinase 2	Cytoskeletal	NR	0	M	508	0	0		6	0	ExpAA=0.00 First60=0.00 PredHel=0 Topology=o	508	0						CYT		57.592	9.62			0.71	2.201	0.004	nuc	MVRRFRR|KS 0.640 *ProP* ; GEERKKR|DF 0.721 *ProP*	PF00069	Protein kinase domain	PTHR11909	4.3e-77	AgB01_g463_t04-IPRSCAN	IPR000719; IPR008271; IPR017441; IPR011009	Proteinkinasedomain; Serine/threonine-proteinkinase,activesite; Proteinkinase,ATPbindingsite; Proteinkinase-likedomainsuperfamily	N	-181.68	-	No	84	6.4e-22	0.718913	CK1/TTBKL protein kinase	-0.978062	0.00634867
462	AgB01_g464_t01	SEC14-like_protein_4	Conserved plasma membrane protein - 4 predicted membrane helices	Uncharacterized / membrane	CDD	0	M	250	0	0		5	0	ExpAA=58.76 First60=0.00 PredHel=3 Topology=i159-177o192-214i227-249o	250	3	24.8	6.4	68.8			CYT		28.448	6.44			0.562	2.037	0.004	end		PF00650	CRAL/TRIO domain	PTHR23324	6.2e-47	AgB01_g464_t01-IPRSCAN	IPR001251; IPR036865; IPR036273; IPR001251	CRAL-TRIOlipidbindingdomain; CRAL-TRIOlipidbindingdomainsuperfamily; CRAL/TRIO,N-terminaldomainsuperfamily	N	-113.98	-	No					-0.956585	0.00713652
463	AgB01_g465_t01	adp-ribosylation_crystallin_j1	COG1397 DraG ADP-ribosylglycohydrolase - GPI anchored	Post-translational Modifications / GPI	COG	5e-14	M	342	0	1		8	0	ExpAA=0.18 First60=0.07 PredHel=0 Topology=o	342	0						CYT		37.5	5.63			0.646	1.704	0.003	cyt		PF03747	ADP-ribosylglycohydrolase	PTHR16222	2.7e-17	AgB01_g465_t01-IPRSCAN	IPR036705; IPR005502; IPR036705	ADP-ribosylation/CrystallinJ1superfamily; ADP-ribosylation/CrystallinJ1	Y	-132.05	-	No					-0.983658	0.006158
464	AgB01_g466_t01	hypothetical_protein	Unknown product - 2 predicted membrane helices	Unknown / membrane			M	59	0	0	M(3.32)	1	0	ExpAA=16.36 First60=16.36 PredHel=1 Topology=i30-52o	59	1	37.3	11.9	50.8		7	CYT		6.703	7.88			0.606	2.08	0.004	nuc						AgB01_g466_t01-IPRSCAN			N	Too short sequence	-	No					-0.890289	0.0102332
465	AgB01_g467_t05	Esterase	Esterases and lipases - probable fragment	Lipid Metabolism	CDD	4e-24	M	329	0	0		9	0	ExpAA=1.48 First60=0.00 PredHel=0 Topology=o	329	0						CYT		37.398	8.66			0.36	0.723	0.001	cyt		PF00135	Carboxylesterase family	PTHR45029	4.1e-60	AgB01_g467_t05-IPRSCAN	IPR029058; IPR002018; IPR029058	Alpha/Betahydrolasefold; Carboxylesterase,typeB	N	-142.83	-	No					-0.780947	0.0184828
466	AgB01_g468_t01	E3_ubiquitin-protein_ligase_TRIM13	E3 ubiquitin-protein ligase TRIM33-like - probable fragment	Proteasome	REFSEQ-INVERTEBRATE	7e-14	M	626	0	2		27	0	ExpAA=0.02 First60=0.01 PredHel=0 Topology=o	626	0						CYT		71.595	6.01			0.421	0.791	0.002	nuc		PF13445	RING-type zinc-finger	PTHR25462	7.7e-18	AgB01_g468_t01-IPRSCAN	IPR013083; IPR001841; IPR027370; IPR017907	Zincfinger,RING/FYVE/PHD-type; Zincfinger,RING-type; RING-typezinc-finger,LisHdimerisationmotif; Zincfinger,RING-type,conservedsite	N	-126.86	-	No					-0.8083	0.0159496
467	AgB01_g469_t01	Homeobox_protein_ceh-30	Unknown product	Unknown			M	134	0	0		1	0	ExpAA=0.15 First60=0.03 PredHel=0 Topology=o	134	0						CYT		14.143	7.96			0.714	2.66	0.005	nuc						AgB01_g469_t01-IPRSCAN			N	Too short sequence	-	No					-0.795035	0.0171324
468	AgB01_g470_t01	Homeobox_protein_ceh-30	animal organ development - positive regulation of transcription by RNA polymerase II - tissue development - nervous system development - - probable fragment	Transcription Machinery	GO	1e-43	S	228	0	0		2	0	ExpAA=0.05 First60=0.00 PredHel=0 Topology=o	228	0						CYT		24.751	9.69			0.463	0.999	0.002	nuc		PF00046	Homeobox domain	PTHR24330:SF13	1.7e-60	AgB01_g470_t01-IPRSCAN	IPR001356; IPR009057; IPR020479; IPR000047; IPR017970	Homeoboxdomain; Homeobox-likedomainsuperfamily; Homeoboxdomain,metazoa; Helix-turn-helixmotif; Homeobox,conservedsite	N	-161.61	-	No					-0.891532	0.0101644
469	AgB01_g471_t02	hypothetical_protein	Unknown product	Unknown			M	88	0	0	W(3.06)	4	0	ExpAA=0.02 First60=0.01 PredHel=0 Topology=o	88	0						CYT		9.738	9.24			0.789	3.142	0.006	nuc						AgB01_g471_t02-IPRSCAN			N	Too short sequence	-	No					-0.973556	0.00650648
470	AgB01_g472_t05	hemicentin-1	Thrombospondin type 1 domain containing protein - signalP detected	Extracellular Matrix	NR	0	M	974	0	1	C(3.16)	73	0	ExpAA=3.38 First60=3.35 PredHel=0 Topology=o	974	0						SIG	19-20	108.82	6.18	106.894	6.14	0.216	0.42	0.001	nuc		PF00090; PF00090; PF00090; PF00090; PF00090; PF00090; PF00090; PF00090	Thrombospondin type 1 domain; Thrombospondin type 1 domain; Thrombospondin type 1 domain; Thrombospondin type 1 domain; Thrombospondin type 1 domain; Thrombospondin type 1 domain; Thrombospondin type 1 domain; Thrombospondin type 1 domain			AgB01_g472_t05-IPRSCAN	IPR000884; IPR036383; IPR000884	Thrombospondintype-1(TSP1)repeat; Thrombospondintype-1(TSP1)repeatsuperfamily	N	-53.39	-	No					-0.836756	0.0136768
471	AgB01_g473_t01	hypothetical_protein	Unknown product	Unknown			V	178	0	0		8	0	ExpAA=0.04 First60=0.02 PredHel=0 Topology=o	178	0						CYT		20.126	6.73			0.795	3.652	0.007	mit						AgB01_g473_t01-IPRSCAN			N	Too short sequence	-	No					-0.9909	0.00591966
472	AgB01_g474_t02	homeobox_protein_ceh-31	uncharacterized protein - regulation of transcription by RNA polymerase II - nucleus - transcriptional activator	Transcription Machinery	GO	1e-21	M	175	0	0		4	0	ExpAA=0.02 First60=0.01 PredHel=0 Topology=o	175	0						CYT		20.197	9.06			0.744	2.609	0.005	nuc		PF00046	Homeobox domain	PTHR24330	4.4e-36	AgB01_g474_t02-IPRSCAN	IPR001356; IPR020479; IPR017970; IPR009057	Homeoboxdomain; Homeoboxdomain,metazoa; Homeobox,conservedsite; Homeobox-likedomainsuperfamily	N	Too short sequence	-	No					-0.995599	0.00576996
473	AgB01_g475_t01	trifunctional_enzyme_subunit	3-hydroxyacyl-CoA dehydrogenase	Lipid Metabolism	PFAM	1e-08	M	131	0	0		3	0	ExpAA=2.50 First60=2.50 PredHel=0 Topology=o	131	0						CYT		14.364	9.55			0.784	5.139	0.01	cyt		PF02737	3-hydroxyacyl-CoA dehydrogenase, NAD binding domain	PTHR43145:SF4	3.7e-13	AgB01_g475_t01-IPRSCAN	IPR036291; IPR006176	NAD(P)-bindingdomainsuperfamily; 3-hydroxyacyl-CoAdehydrogenase,NADbinding	N	Too short sequence	-	No					-1.03381	0.00468437
474	AgB01_g476_t01	Trifunctional_enzyme_subunit_alpha	Unknown product	Unknown			M	516	0	0		2	0	ExpAA=0.00 First60=0.00 PredHel=0 Topology=o	516	0						CYT		56.005	5.58			0.407	0.775	0.002	nuc	KRGRTRK|SV 0.748 *ProP*					AgB01_g476_t01-IPRSCAN			N	-179.47	-	No					-0.950775	0.00736581
475	AgB01_g477_t01	zinc_finger_ccch_domain-containing_protein_3	Exosome complex component CSL4 - probable fragment	Protein Export	NR	7e-97	M	752	0	2		20	0	ExpAA=0.11 First60=0.00 PredHel=0 Topology=o	752	0						CYT		81.815	6.21			0.414	0.769	0.002	nuc	MSWRRRR|TN 0.611 *ProP*	PF14382; PF10447	Exosome complex exonuclease RRP4 N-terminal region; Exosome component EXOSC1/CSL4	PTHR12686	2.9e-56	AgB01_g477_t01-IPRSCAN	IPR025721; IPR019495; IPR012340	Exosomecomplexcomponent,N-terminaldomain; ExosomecomplexcomponentCSL4; Nucleicacid-binding,OB-fold	N	-92.96	-	No					-0.987227	0.00603939
476	AgB01_g478_t02	26S_proteasome_non-ATPase_regulatory_subunit_9	26s proteasome non-atpase regulatory subunit 9	Proteasome	NR	6e-84	M	203	0	0		2	0	ExpAA=0.00 First60=0.00 PredHel=0 Topology=o	203	0						CYT		22.661	6.31			0.518	1.1	0.002	nuc		PF13180	PDZ domain	PTHR12651	1.9e-66	AgB01_g478_t02-IPRSCAN	IPR036034; IPR001478; IPR035269	PDZsuperfamily; PDZdomain; 26SProteasomenon-ATPaseregulatorysubunit9	N	-292.81	-	No					-0.955835	0.0071657
477	AgB01_g479_t02	Heterogeneous_nuclear_ribonucleoprotein_L,_partial	Heterogeneous nuclear ribonucleoprotein L (contains RRM repeats) - probable fragment	Transcription Machinery	KOG	1e-90	M	614	0	4	G(3.38)	10	0	ExpAA=0.02 First60=0.00 PredHel=0 Topology=o	614	0						CYT		66.27	6.9			0.604	1.574	0.003	nuc	FPQRSER|SS 0.594 *ProP*	PF00076; PF00076; PF13893	RNA recognition motif. (a.k.a. RRM, RBD, or RNP domain); RNA recognition motif. (a.k.a. RRM, RBD, or RNP domain); RNA recognition motif. (a.k.a. RRM, RBD, or RNP domain)	PTHR44018	1e-195	AgB01_g479_t02-IPRSCAN	IPR000504; IPR012677; IPR035979; IPR012677	RNArecognitionmotifdomain; Nucleotide-bindingalpha-betaplaitdomainsuperfamily; RNA-bindingdomainsuperfamily	N	-159.45	-	No	-127.6	4.9	0.256821	subthreshold	-1.01383	0.00522381
478	AgB01_g480_t09	hypothetical_protein	Unknown product	Unknown			M	125	0	0	C(3.71)H(3.21)	11	0	ExpAA=0.70 First60=0.70 PredHel=0 Topology=o	125	0						CYT		14.15	9.19			0.796	3.217	0.006	nuc						AgB01_g480_t09-IPRSCAN			N	Too short sequence	-	No					-0.941863	0.00773189
479	AgB01_g481_t05	hypothetical_protein	Unknown product	Unknown			M	256	0	1		8	0	ExpAA=0.54 First60=0.26 PredHel=0 Topology=o	256	0						CYT		29.1	6.09			0.676	2.035	0.004	cyt						AgB01_g481_t05-IPRSCAN			N	-176.81	-	No					-1.01576	0.00516926
480	AgB01_g482_t05	Serine/threonine-protein_phosphatase_2A_regulatory_subunit_B''_subunit_beta	Serine/threonine-protein phosphatase 2A regulatory subunit B'' subunit beta - probable fragment	Signal Transduction	NR	0	M	906	0	0		9	0	ExpAA=0.00 First60=0.00 PredHel=0 Topology=o	906	0						CYT		101.033	8.99			0.425	0.803	0.002	nuc		PF13499	EF-hand domain pair	PTHR14095	2.5e-153	AgB01_g482_t05-IPRSCAN	IPR002048; IPR018247; IPR011992; IPR002048	EF-handdomain; EF-Hand1,calcium-bindingsite; EF-handdomainpair	N	-132.93	-	No					-0.976172	0.0064144
481	AgB01_g483_t01	hypothetical_protein	Unknown product	Unknown			T	102	0	0		3	0	ExpAA=0.02 First60=0.02 PredHel=0 Topology=i	102	0						CYT		12.002	10.1			0.755	3.038	0.006	nuc						AgB01_g483_t01-IPRSCAN			N	Too short sequence	-	No					-0.862183	0.011918
482	AgB01_g484_t02	E3_ubiquitin-protein_ligase_RNF19B	e3 ubiquitin-protein ligase rnf19b - 3 predicted membrane helices	Proteasome / membrane	NR	0	M	735	0	1		31	0	ExpAA=51.63 First60=0.00 PredHel=2 Topology=o212-234i255-277o	735	2	6	91.2	2.9			CYT		79.334	7.54			0.537	1.109	0.002	end		PF01485; PF01485	IBR domain, a half RING-finger domain; IBR domain, a half RING-finger domain	PTHR11685:SF215	9.6e-115	AgB01_g484_t02-IPRSCAN	IPR002867; IPR031127; IPR002867	IBRdomain; E3ubiquitinligaseRBRfamily	N	-39.8	-	No					-0.978137	0.0063461
483	AgB01_g485_t01	spindle-_and_centromere-associated_protein	Unknown product - GPI anchored	Unknown / GPI			D	146	0	1		4	0	ExpAA=1.13 First60=0.02 PredHel=0 Topology=o	146	0						CYT		16.504	7.12			0.8	3.341	0.007	nuc						AgB01_g485_t01-IPRSCAN			Y	Too short sequence	-	No					-0.978831	0.00632213
484	AgB01_g486_t02	dtw_domain-containing_protein_1	dtw domain-containing protein 1	Uncharacterized	NR	0	M	432	0	0		21	0	ExpAA=0.00 First60=0.00 PredHel=0 Topology=o	432	0						CYT		48.769	6.31			0.405	0.77	0.002	nuc		PF03942	DTW domain	PTHR15627:SF8	1.2e-65	AgB01_g486_t02-IPRSCAN	IPR005636; IPR005636	DTW	N	-145.75	-	No					-0.969006	0.00666976
485	AgB01_g487_t01	b-cell_receptor-associated_protein_31	Unknown product	Unknown			M	189	0	0		8	0	ExpAA=1.26 First60=1.20 PredHel=0 Topology=o	189	0						CYT		21.946	9.6			0.834	3.987	0.008	nuc						AgB01_g487_t01-IPRSCAN			N	Too short sequence	-	No					-1.02717	0.00485716
486	AgB01_g488_t01	Twinkle_protein,_partial	mitochondrial DNA helicase twinkle - probable fragment	Nuclear Regulation	KOG	1e-74	M	585	0	1		11	0	ExpAA=0.04 First60=0.00 PredHel=0 Topology=o	585	0						CYT		67.328	8.68			0.192	0.381	0.001	nuc				PTHR12873	1.7e-58	AgB01_g488_t01-IPRSCAN	IPR027417	P-loopcontainingnucleosidetriphosphatehydrolase	N	-179.4	-	No					-0.938106	0.00789156
487	AgB01_g489_t01	galactokinase	COG0153 GalK Galactokinase - probable fragment	Carbohydrate Metabolism	COG	2e-67	M	278	0	0		11	0	ExpAA=1.14 First60=1.09 PredHel=0 Topology=o	278	0						CYT		30.986	5.29			0.454	0.861	0.002	cyt		PF00288; PF08544	GHMP kinases N terminal domain; GHMP kinases C terminal	PTHR10457:SF6	8.8e-79	AgB01_g489_t01-IPRSCAN	IPR014721; IPR020568; IPR000705; IPR006206; IPR006204; IPR036554; IPR013750; IPR006203; IPR036554	RibosomalproteinS5domain2-typefold,subgroup; RibosomalproteinS5domain2-typefold; Galactokinase; Mevalonate/galactokinase; GHMPkinaseN-terminaldomain; GHMPkinase,C-terminaldomainsuperfamily; GHMPkinase,C-terminaldomain; GHMPkinase,ATP-binding,conservedsite	N	-152.78	-	No					-1.0222	0.00499082
488	AgB01_g490_t09	TBC1_domain_family_member_2B,_partial	Ypt/Rab GTPase activating protein - probable fragment	Protein Export	KOG	2e-49	A	659	0	1		16	0	ExpAA=2.31 First60=0.07 PredHel=0 Topology=o	659	0						CYT		75.987	8.45			0.478	0.988	0.002	nuc		PF00566; PF00169	Rab-GTPase-TBC domain; PH domain	PTHR22957	4.5e-122	AgB01_g490_t09-IPRSCAN	IPR000195; IPR001849; IPR011993; IPR035969; IPR001849	Rab-GTPase-TBCdomain; Pleckstrinhomologydomain; PH-likedomainsuperfamily; Rab-GTPase-TBCdomainsuperfamily	N	-128.24	-	No					-0.99697	0.00572699
489	AgB01_g491_t05	Protein_scabrous	Ficolin - probable fragment	Immunologically Relevant	KOG	4e-40	M	664	0	0		11	0	ExpAA=0.53 First60=0.52 PredHel=0 Topology=o	664	0						CYT		76.297	5.24			0.509	1.032	0.002	nuc		PF00147	Fibrinogen beta and gamma chains, C-terminal globular domain	PTHR19143:SF336	6.8e-50	AgB01_g491_t05-IPRSCAN	IPR002181; IPR020837; IPR036056; IPR002181	Fibrinogen,alpha/beta/gammachain,C-terminalglobulardomain; Fibrinogen,conservedsite; Fibrinogen-like,C-terminal	N	-152.77	-	No					-0.945531	0.0075791
490	AgB01_g492_t03	Epithelial_discoidin_domain-containing_receptor_1	epithelial discoidin domain-containing receptor 1 - signalP detected	Signal Transduction	NR	0	M	848	0	2		23	0	ExpAA=22.78 First60=0.02 PredHel=1 Topology=o402-424i	848	1	2.6	47.4	50		424	SIG	25-26	95.927	5.64	93.126	5.61	0.136	0.289	0.001	nuc	AVKRLRR|GA 0.600 *ProP*	PF00754; PF07714	F5/8 type C domain; Protein tyrosine kinase	PTHR24416:SF395	1.2e-168	AgB01_g492_t03-IPRSCAN	IPR000421; IPR008266; IPR008979; IPR017441; IPR001245; IPR011009; IPR000719; IPR020635; IPR000421	Coagulationfactor5/8C-terminaldomain; Tyrosine-proteinkinase,activesite; Galactose-binding-likedomainsuperfamily; Proteinkinase,ATPbindingsite; Serine-threonine/tyrosine-proteinkinase,catalyticdomain; Proteinkinase-likedomainsuperfamily; Proteinkinasedomain; Tyrosine-proteinkinase,catalyticdomain	N	-122.49	-	No	170.1	7.8e-48	0.782845	TK/DDR protein kinase	-0.920861	0.00866746
491	AgB01_g493_t01	hypothetical_protein	Unknown product	Unknown			T	108	0	0		5	0	ExpAA=3.63 First60=3.32 PredHel=0 Topology=o	108	0						BL	25-26	12.418	10.63	9.407	11.42	0.948	7.15	0.014	exc						AgB01_g493_t01-IPRSCAN			N	Too short sequence	-	No					-0.985542	0.0060951
492	AgB01_g494_t07	beta-_-galactosyltransferase_bre-5	beta- -galactosyltransferase bre-5	Carbohydrate Metabolism	NR	0	M	345	0	0		5	0	ExpAA=21.08 First60=20.85 PredHel=1 Topology=i12-34o	345	1	6.4	90.1	3.5		311	BL/SIG		39.798	8.83			0.814	3.72	0.007	mit		PF01762	Galactosyltransferase	PTHR11214:SF207	1.5e-57	AgB01_g494_t07-IPRSCAN	IPR002659; IPR002659	Glycosyltransferase,family31	N	-123.14	-	No					-0.931445	0.00818272
493	AgB01_g495_t01	Beta-1,3-galactosyltransferase_bre-5	Unknown product	Unknown			M	163	0	0		4	0	ExpAA=36.12 First60=23.28 PredHel=1 Topology=i20-42o	163	1	13.5	74.2	12.3		121	BL/SIG		18.403	8.98			0.904	5.628	0.011	mit		PF01762	Galactosyltransferase	PTHR11214:SF207	2.9e-17	AgB01_g495_t01-IPRSCAN	IPR002659; IPR002659	Glycosyltransferase,family31	N	Too short sequence	-	No					-0.931582	0.00817661
494	AgB01_g496_t01	influenza_virus_ns1a-binding_protein	Protein containing BTB/POZ and Kelch - probable fragment	Signal Transduction	KOG	2e-75	M	550	0	4		15	0	ExpAA=0.04 First60=0.00 PredHel=0 Topology=o	550	0						CYT		60.434	5.13			0.488	0.974	0.002	nuc		PF01344; PF01344; PF01344; PF01344; PF01344; PF01344	Kelch motif; Kelch motif; Kelch motif; Kelch motif; Kelch motif; Kelch motif	PTHR24412	1.4e-97	AgB01_g496_t01-IPRSCAN	IPR011043; IPR015915; IPR006652; IPR006652	Galactoseoxidase/kelch,beta-propeller; Kelch-typebetapropeller; Kelchrepeattype1	N	-135.4	-	No					-0.942261	0.00771517
495	AgB01_g497_t02	hypothetical_protein	Unknown product	Unknown			M	59	0	0	M(3.98)	4	0	ExpAA=0.00 First60=0.00 PredHel=0 Topology=o	59	0						CYT		6.804	5.18			0.757	2.909	0.006	nuc						AgB01_g497_t02-IPRSCAN			N	Too short sequence	-	No					-0.983824	0.00615244
496	AgB01_g498_t01	hypothetical_protein	Dermatopontin - signalP detected	Extracellular Matrix	PFAM	1e-28	M	446	0	2		10	0	ExpAA=4.96 First60=4.96 PredHel=0 Topology=o	446	0						SIG	22-23	50.314	5.61	47.739	5.31	0.582	1.407	0.003	nuc		PF14704	Dermatopontin			AgB01_g498_t01-IPRSCAN			N	-136.25	-	No					-0.944902	0.00760509
497	AgB01_g499_t04	hypothetical_protein	Unknown product	Unknown			M	122	0	0		3	0	ExpAA=0.01 First60=0.00 PredHel=0 Topology=i	122	0						CYT		14.091	9.76			0.708	2.743	0.005	mit						AgB01_g499_t04-IPRSCAN			N	Too short sequence	-	No					-0.858902	0.0121318
498	AgB01_g500_t02	hypothetical_protein	Unknown product - 4 predicted membrane helices	Unknown / membrane			M	244	0	1		16	0	ExpAA=55.48 First60=0.25 PredHel=3 Topology=i64-86o148-170i191-213o	244	3	27	38.1	34.8			CYT		27.401	9.3			0.94	6.922	0.014	end						AgB01_g500_t02-IPRSCAN			N	-124.26	-	No					-0.952009	0.00731651
499	AgB01_g501_t04	hypothetical_protein	Conserved secreted protein precursor	Secreted / Uncharacterized	CDD	1e-32	M	217	0	1		15	0	ExpAA=0.14 First60=0.14 PredHel=0 Topology=o	217	0						SIG	17-18	23.852	9.35	21.914	9.29	0.756	2.83	0.006	nuc		PF01607	Chitin binding Peritrophin-A domain			AgB01_g501_t04-IPRSCAN	IPR002557; IPR036508	Chitinbindingdomain; Chitinbindingdomainsuperfamily	N	-187.68	-	No					-0.954072	0.0072348
500	AgB01_g502_t01	hypothetical_protein	Unknown product	Unknown			C	44	0	0		2	0	ExpAA=0.00 First60=0.00 PredHel=0 Topology=o	44	0						CYT		4.804	10.47			0.856	4.016	0.008	nuc						AgB01_g502_t01-IPRSCAN			N	Too short sequence	-	No					-1.03892	0.00455549
501	AgB01_g503_t01	Integral_membrane_protein_2B	extracellular exosome - negative regulation of amyloid precursor protein biosynthetic process - integral component of membrane - membrane - nervous - probable fragment	Protein Export	GO	2e-11	M	233	0	0		6	0	ExpAA=6.82 First60=5.03 PredHel=0 Topology=o	233	0						CYT		27.672	8.88			0.874	0.416	0.001	cyt	YFIRDKR|RV 0.595 *ProP*	PF04089	BRICHOS domain	PTHR10962:SF1	6.1e-24	AgB01_g503_t01-IPRSCAN	IPR007084; IPR007084	BRICHOSdomain	N	-167.29	-	No					-0.861824	0.0119413
502	AgB01_g504_t02	hypothetical_protein	Unknown product	Unknown			M	118	0	0		1	0	ExpAA=0.09 First60=0.09 PredHel=0 Topology=o	118	0						BL	22-23	13.547	5.22	11.236	5.49	0.482	0.979	0.002	cyt						AgB01_g504_t02-IPRSCAN	IPR023606	CoA-transferasefamilyIIIdomainsuperfamily	N	Too short sequence	-	No					-1.03987	0.00453186
503	AgB01_g505_t01	hypothetical_protein	Unknown product	Unknown			R	101	0	0		5	0	ExpAA=0.01 First60=0.01 PredHel=0 Topology=o	101	0						CYT		11.523	8.39			0.882	5.288	0.011	mit						AgB01_g505_t01-IPRSCAN			N	Too short sequence	-	No					-0.936559	0.00795825
504	AgB01_g506_t01	hypothetical_protein	Unknown product	Unknown			L	134	0	0		1	0	ExpAA=2.86 First60=0.09 PredHel=0 Topology=o	134	0						CYT		15.245	9.61			0.755	2.734	0.005	cyt						AgB01_g506_t01-IPRSCAN	IPR023606	CoA-transferasefamilyIIIdomainsuperfamily	N	Too short sequence	-	No					-0.942588	0.00770143
505	AgB01_g507_t01	Arylacetamide_deacetylase	COG0657 Aes Esterase/lipase - probable fragment	Lipid Metabolism	COG	1e-14	M	154	0	3		2	0	ExpAA=0.05 First60=0.00 PredHel=0 Topology=o	154	0						CYT		17.589	5.02			0.751	2.833	0.006	nuc		PF07859	alpha/beta hydrolase fold	PTHR23024	6.2e-19	AgB01_g507_t01-IPRSCAN	IPR029058; IPR013094; IPR029058	Alpha/Betahydrolasefold; Alpha/betahydrolasefold-3	N	Too short sequence	-	No					-0.93006	0.00824458
506	AgB01_g508_t01	Uncharacterized_protein_C09G5.8	hypothetical secreted protein precursor - GPI anchored	Secreted / Unknown / GPI			L	282	0	0		12	0	ExpAA=10.30 First60=2.60 PredHel=0 Topology=o	282	0						SIG	22-23	31.535	9.23	29.148	9.16	0.663	1.744	0.003	exc						AgB01_g508_t01-IPRSCAN			Y	-115.43	-	No					-0.940487	0.00778998
507	AgB01_g509_t02	Zinc_finger_protein_Gfi-1	growth factor independent 1B transcription repressor - erythrocyte differentiation - regulation of transcription - probable fragment	Signal Transduction	GO	2e-63	M	356	0	0		14	0	ExpAA=0.02 First60=0.00 PredHel=0 Topology=o	356	0						CYT		39.924	9.25			0.882	5.152	0.01	nuc	-MSRVKR|EI 0.628 *ProP*	PF13912; PF00096; PF00096; PF00096; PF00096	C2H2-type zinc finger; Zinc finger, C2H2 type; Zinc finger, C2H2 type; Zinc finger, C2H2 type; Zinc finger, C2H2 type	PTHR44643	2.6e-81	AgB01_g509_t02-IPRSCAN	IPR013087; IPR036236; IPR037044	ZincfingerC2H2-type; ZincfingerC2H2superfamily; ZincfingerproteinGfi-1b	N	-144.46	-	No					-0.926574	0.00840239
508	AgB01_g510_t01	mpv17-like_protein	MpV17 mitochondrial inner membrane protein - cytoplasm - regulation of reactive oxygen species metabolic process - reactive oxygen species metabolic - probable fragment	Energy Metabolism	GO	9e-11	M	100	0	0		1	0	ExpAA=22.25 First60=14.76 PredHel=0 Topology=o	100	0						CYT		11.483	9.74			0.517	1.127	0.002	nuc		PF04117	Mpv17 / PMP22 family	PTHR11266	2.2e-19	AgB01_g510_t01-IPRSCAN	IPR007248; IPR007248	Mpv17/PMP22	N	Too short sequence	-	No					-0.902499	0.00957682
509	AgB01_g511_t01	hypothetical_protein	Unknown product	Unknown			M	890	0	1		15	0	ExpAA=0.03 First60=0.00 PredHel=0 Topology=o	890	0						CYT		96.964	5.06			0.306	0.57	0.001	nuc						AgB01_g511_t01-IPRSCAN			N	-114.09	-	No					-0.939436	0.00783464
510	AgB01_g512_t14	Arylacetamide_deacetylase	Unknown product	Unknown			M	108	0	1		6	0	ExpAA=0.12 First60=0.00 PredHel=0 Topology=o	108	0						CYT		12.175	8.27			0.808	3.696	0.007	cyt		PF07859	alpha/beta hydrolase fold	PTHR23024:SF340	1.2e-26	AgB01_g512_t14-IPRSCAN	IPR029058; IPR013094	Alpha/Betahydrolasefold; Alpha/betahydrolasefold-3	N	Too short sequence	-	No					-1.03269	0.00471305
511	AgB01_g513_t01	Arylacetamide_deacetylase,_partial	Unknown product	Unknown			M	121	0	0		5	0	ExpAA=1.64 First60=0.00 PredHel=0 Topology=o	121	0						CYT		13.989	9.46			0.912	6.159	0.012	nuc						AgB01_g513_t01-IPRSCAN			N	Too short sequence	-	No					-0.967783	0.00671432
512	AgB01_g514_t01	hypothetical_protein	another transcription unit protein - probable fragment	Transcription Machinery	REFSEQ-INVERTEBRATE	2e-15	M	503	0	0		4	0	ExpAA=1.38 First60=1.38 PredHel=0 Topology=o	503	0						CYT		56.899	10.3			0.558	1.27	0.003	nuc	RRSGSKR|SR 0.611 *ProP* ; SHSRSPR|SA 0.756 *ProP* ; KRKRKRR|SP 0.772 *ProP* ; GDQRHRR|DR 0.644 *ProP* ; QRHRRDR|HR 0.500 *ProP*			PTHR15836	1.2e-34	AgB01_g514_t01-IPRSCAN	IPR028851	Periphilin-1	N	-161.33	-	No					-1.02566	0.00489745
513	AgB01_g515_t01	Multidrug_resistance-associated_protein_1,_partial	vacuolar membrane - transmembrane transport - ATPase - probable fragment - 6 predicted membrane helices	Transporters / membrane	GO	9e-82	M	396	0	1		6	0	ExpAA=107.94 First60=0.01 PredHel=5 Topology=i120-142o167-189i240-259o264-283i347-369o	396	5	26.3	14.4	59.3			CYT		43.616	9.05			0.522	1.228	0.002	end		PF00664	ABC transporter transmembrane region	PTHR24223	1.2e-107	AgB01_g515_t01-IPRSCAN	IPR036640; IPR011527; IPR011527	ABCtransportertype1,transmembranedomainsuperfamily; ABCtransportertype1,transmembranedomain	N	-63.17	-	No					-0.955572	0.00717597
514	AgB01_g516_t01	28_kDa_inner_dynein_arm_light_chain,_axonemal	Unknown product	Unknown			M	79	0	0		2	0	ExpAA=11.45 First60=2.02 PredHel=0 Topology=o	79	0						CYT		9.498	9.59			0.319	0.594	0.001	mit						AgB01_g516_t01-IPRSCAN			N	Too short sequence	-	No					-0.903113	0.00954494
515	AgB01_g517_t04	Protein_crumb	Cadherin EGF LAG seven-pass G-type receptor - probable fragment	Signal Transduction	KOG	2e-31	M	1085	0	1	C(3.61)	93	0	ExpAA=22.90 First60=0.00 PredHel=1 Topology=o1024-1046i	1085	1	2	94.4	3.6		39	CYT		118.269	4.93			0.403	0.772	0.002	nuc	VTLRSRR|AV 0.515 *ProP*	PF02210; PF02210; PF00008; PF00008; PF00008; PF00008; PF00008; PF00008; PF07645; PF07645; PF12661; PF12661	Laminin G domain; Laminin G domain; EGF-like domain; EGF-like domain; EGF-like domain; EGF-like domain; EGF-like domain; EGF-like domain; Calcium-binding EGF domain; Calcium-binding EGF domain; Human growth factor-like EGF; Human growth factor-like EGF	PTHR24043	7.4e-193	AgB01_g517_t04-IPRSCAN	IPR001791; IPR013032; IPR009030; IPR001881; IPR013320; IPR000152; IPR000742; IPR018097; IPR000152	LamininGdomain; EGF-like,conservedsite; Growthfactorreceptorcysteine-richdomainsuperfamily; EGF-likecalcium-bindingdomain; ConcanavalinA-likelectin/glucanasedomainsuperfamily; EGF-typeaspartate/asparaginehydroxylationsite; EGF-likedomain; EGF-likecalcium-binding,conservedsite	N	-97.87	-	No					-0.901226	0.00964323
516	AgB01_g518_t01	Protein_crumb	Unknown product	Unknown			M	44	0	0		2	0	ExpAA=0.02 First60=0.02 PredHel=0 Topology=i	44	0						CYT		5.253	11.05			0.835	4.127	0.008	mit						AgB01_g518_t01-IPRSCAN			N	Too short sequence	-	No					-1.00274	0.00554954
517	AgB01_g519_t01	hypothetical_protein	Unknown product	Unknown			M	127	0	0		4	0	ExpAA=2.76 First60=2.76 PredHel=0 Topology=o	127	0						CYT		14.764	10.08			0.835	3.959	0.008	cyt						AgB01_g519_t01-IPRSCAN			N	Too short sequence	-	No					-1.01481	0.00519591
518	AgB01_g520_t01	hypothetical_protein	Unknown product	Unknown			M	195	0	0		7	0	ExpAA=13.33 First60=13.06 PredHel=0 Topology=o	195	0						CYT		21.851	9.25			0.486	1.005	0.002	mit						AgB01_g520_t01-IPRSCAN			N	Too short sequence	-	No					-1.02586	0.00489215
519	AgB01_g521_t01	hypothetical_protein	Protein cereblon - proteasome-mediated ubiquitin-dependent protein catabolic process - Cul4A-RING E3 ubiquitin ligase complex - protein - signalP detected	Proteasome	GO	2e-06	M	149	0	0	W(3.01)	7	0	ExpAA=21.85 First60=21.57 PredHel=1 Topology=o4-26i	149	1	14.8	2.7	82.6		123	SIG	22-23	16.906	7.65	14.324	8.31	0.326	0.65	0.001	nuc				PTHR14255:SF4	4.6e-24	AgB01_g521_t01-IPRSCAN	IPR034750; IPR034750	CULTdomain	N	Too short sequence	-	No					-1.00198	0.00557275
520	AgB01_g522_t03	hypothetical_protein	Unknown product - signalP detected	Unknown			M	215	0	0		7	0	ExpAA=23.90 First60=1.45 PredHel=1 Topology=o169-191i	215	1	10.2	78.6	11.2		24	SIG	19-20	24.008	8.52	22.026	8.55	0.188	0.373	0.001	end						AgB01_g522_t03-IPRSCAN			N	-183.42	-	No					-0.966127	0.00677515
521	AgB01_g523_t04	Uncharacterized_protein_K12H4.5	Unknown product - Membrane anchor detected	Unknown / membrAnchor			M	110	0	1	W(3.26)Y(3.38)	1	0	ExpAA=16.80 First60=16.80 PredHel=0 Topology=o	110	0						ANC		12.97	9.67	8.294	9.1	0.868	4.881	0.01	nuc						AgB01_g523_t04-IPRSCAN			N	Too short sequence	-	No					-0.885206	0.0105194
522	AgB01_g524_t04	Oxysterol-binding_protein-related_protein_1	oxysterol-binding protein 1	Lipid Metabolism	NR	0	M	411	0	1		8	0	ExpAA=0.08 First60=0.00 PredHel=0 Topology=o	411	0						CYT		47.597	8.02			0.397	0.767	0.002	mit		PF01237	Oxysterol-binding protein	PTHR10972	8.9e-155	AgB01_g524_t04-IPRSCAN	IPR000648; IPR018494; IPR037239; IPR037239	Oxysterol-bindingprotein; Oxysterol-bindingprotein,conservedsite; Oxysterol-bindingproteinsuperfamily	N	-167.55	-	No					-0.956139	0.00715384
523	AgB01_g525_t02	Protein_CutA	hypothetical secreted protein precursor	Secreted / Unknown			M	87	0	0		2	0	ExpAA=49.51 First60=30.28 PredHel=0 Topology=o	87	0						SIG	25-26	9.298	9.51	6.564	9.63	0.885	2.802	0.006	end		PF03091	CutA1 divalent ion tolerance protein	PTHR23419	5.9e-15	AgB01_g525_t02-IPRSCAN	IPR011322; IPR004323; IPR015867	NitrogenregulatoryPII-like,alpha/beta; Divalentiontoleranceprotein,CutA; NitrogenregulatoryproteinPII/ATPphosphoribosyltransferase,C-terminal	N	Too short sequence	-	No					-0.862786	0.0118791
524	AgB01_g526_t04	Signal_transducing_adapter_molecule_1	Signal transducing adaptor protein STAM/STAM2	Signal Transduction	KOG	0	M	393	0	7		9	0	ExpAA=0.01 First60=0.00 PredHel=0 Topology=o	393	0						CYT		43.704	4.73			0.325	5.293	0.011	nuc		PF00018; PF00790	SH3 domain; VHS domain	PTHR13856	2.1e-88	AgB01_g526_t04-IPRSCAN	IPR001452; IPR008942; IPR002014; IPR003903; IPR036028	SH3domain; ENTH/VHS; VHSdomain; Ubiquitininteractingmotif; SH3-likedomainsuperfamily	N	-183.97	-	No					-0.948089	0.00747429
525	AgB01_g527_t04	hypothetical_protein	Unknown product	Unknown			M	194	0	0		9	0	ExpAA=0.01 First60=0.00 PredHel=0 Topology=o	194	0						CYT		21.324	8.63			0.501	1.483	0.003	nuc						AgB01_g527_t04-IPRSCAN			N	Too short sequence	-	No					-0.956552	0.0071378
526	AgB01_g528_t01	hypothetical_protein	Unknown product	Unknown			M	191	0	0		8	0	ExpAA=0.63 First60=0.45 PredHel=0 Topology=o	191	0						CYT		21.568	10.24			0.945	7.154	0.014	nuc	TDSRKRR|WA 0.852 *ProP* ; HRERSRR|CL 0.581 *ProP*					AgB01_g528_t01-IPRSCAN			N	Too short sequence	-	No					-0.966308	0.00676848
527	AgB01_g529_t01	hypothetical_protein	Unknown product	Unknown			M	133	0	0		1	0	ExpAA=12.93 First60=2.73 PredHel=0 Topology=o	133	0						ANC		15.652	11.64	6.009	11.78	0.543	1.224	0.002	cyt						AgB01_g529_t01-IPRSCAN			N	Too short sequence	-	No					-0.981424	0.00623344
528	AgB01_g530_t04	G-protein_coupled_receptor_52	g-protein coupled receptor 52 - 7 predicted membrane helices	Signal Transduction / membrane	NR	0	M	326	0	0		13	0	ExpAA=156.16 First60=33.34 PredHel=7 Topology=o15-37i50-72o92-114i138-160o180-202i223-245o260-282i	326	7	47.2	21.5	31.3			BL	41-42	35.981	5.64	31.822	5.94	0.483	1.369	0.003	end		PF00001	7 transmembrane receptor (rhodopsin family)	PTHR44754	1.4e-37	AgB01_g530_t04-IPRSCAN	IPR017452; IPR000276; IPR000276	GPCR,rhodopsin-like,7TM; Gprotein-coupledreceptor,rhodopsin-like	N	25.08	35.26	GPCR					-0.908946	0.00924722
529	AgB01_g531_t14	hypothetical_protein	Unknown product	Unknown			K	342	0	1		7	0	ExpAA=0.00 First60=0.00 PredHel=0 Topology=o	342	0						CYT		37.395	9.41			0.744	2.873	0.006	mit						AgB01_g531_t14-IPRSCAN			N	-195.53	-	No					-0.929003	0.00829211
530	AgB01_g532_t01	hypothetical_protein	Unknown product	Unknown			E	167	0	0		11	0	ExpAA=0.52 First60=0.00 PredHel=0 Topology=o	167	0						CYT		19.687	9.2			0.613	1.58	0.003	nuc						AgB01_g532_t01-IPRSCAN			N	Too short sequence	-	No					-0.99058	0.00593001
531	AgB01_g533_t09	f-box_wd_repeat-containing_protein_11	Beta-TrCP (transducin repeats containing)/Slimb - probable fragment	Signal Transduction	KOG	0	M	344	0	0		6	0	ExpAA=0.10 First60=0.00 PredHel=0 Topology=o	344	0						CYT		40.292	8.18			0.373	0.701	0.001	cyt	MVSRSWR|RV 0.582 *ProP* ; TQHRFYR|SL 0.531 *ProP*	PF00400; PF00400; PF12937; PF12125	WD domain, G-beta repeat; WD domain, G-beta repeat; F-box-like; D domain of beta-TrCP	PTHR44038	3.5e-112	AgB01_g533_t09-IPRSCAN	IPR021977; IPR001680; IPR001810; IPR015943; IPR019775; IPR036047; IPR017986; IPR036322	Ddomainofbeta-TrCP; WD40repeat; F-boxdomain; WD40/YVTNrepeat-like-containingdomainsuperfamily; WD40repeat,conservedsite; F-box-likedomainsuperfamily; WD40-repeat-containingdomain; WD40-repeat-containingdomainsuperfamily	N	-174.97	-	No					-0.910281	0.00918039
532	AgB01_g534_t01	LINE-1_reverse_transcriptase	Unknown product	Unknown			M	129	0	0		2	0	ExpAA=0.00 First60=0.00 PredHel=0 Topology=o	129	0						CYT		14.63	5.02			0.403	0.76	0.002	cyt		PF00078	Reverse transcriptase (RNA-dependent DNA polymerase)			AgB01_g534_t01-IPRSCAN	IPR000477	Reversetranscriptasedomain	N	Too short sequence	-	No					-0.897492	0.00984079
533	AgB01_g535_t01	60S_ribosomal_protein_L11,_partial	60S ribosomal protein L11	Protein Synthesis	NR	0	M	195	0	1		3	0	ExpAA=0.12 First60=0.00 PredHel=0 Topology=o	195	0						CYT		22.481	10.1			0.604	1.375	0.003	nuc		PF00281; PF00673	Ribosomal protein L5; ribosomal L5P family C-terminus	PTHR11994	2e-115	AgB01_g535_t01-IPRSCAN	IPR002132; IPR022803; IPR031310; IPR031309; IPR020929	RibosomalproteinL5; RibosomalproteinL5domainsuperfamily; RibosomalproteinL5,N-terminal; RibosomalproteinL5,C-terminal; RibosomalproteinL5,conservedsite	N	Too short sequence	-	No					-0.911814	0.00910425
534	AgB01_g536_t01	ADAM_17_protease	ADAM 17-like protease - probable fragment	Post-translational Modifications / protease	NR	0	M	368	0	1	C(3.43)	30	0	ExpAA=0.04 First60=0.02 PredHel=0 Topology=o	368	0						CYT		40.11	6.05			0.68	1.952	0.004	nuc		PF16698; PF13574; PF00200	Membrane-proximal domain, switch, for ADAM17; Metallo-peptidase family M12B Reprolysin-like; Disintegrin	PTHR11905	4.9e-118	AgB01_g536_t01-IPRSCAN	IPR001590; IPR024079; IPR036436; IPR001762; IPR032029; IPR036436	PeptidaseM12B,ADAM/reprolysin; Metallopeptidase,catalyticdomainsuperfamily; Disintegrindomainsuperfamily; Disintegrindomain; ADAM17,membrane-proximaldomain	N	-116.23	-	No					-0.959111	0.00703904
535	AgB01_g537_t04	glutaminase	Glutaminase (contains ankyrin repeat)	Amino Acid Metabolism	KOG	0	M	707	0	5		19	0	ExpAA=0.04 First60=0.00 PredHel=0 Topology=o	707	0						CYT		79.273	6.91			0.454	0.883	0.002	mit	ISMRLRR|IW 0.666 *ProP*	PF12796; PF04960; PF04960	Ankyrin repeats (3 copies); Glutaminase; Glutaminase	PTHR12544	2.2e-230	AgB01_g537_t04-IPRSCAN	IPR020683; IPR036770; IPR015868; IPR012338; IPR012338	Ankyrinrepeat-containingdomain; Ankyrinrepeat-containingdomainsuperfamily; Glutaminase; Beta-lactamase/transpeptidase-like	N	-106.26	-	No					-0.978198	0.00634397
536	AgB01_g538_t01	5_-amp-activated_protein_kinase_subunit_beta-2	5 -amp-activated protein kinase subunit beta-2	Signal Transduction	NR	0	M	282	0	1		4	0	ExpAA=0.04 First60=0.00 PredHel=0 Topology=o	282	0						CYT		31.578	7.09			0.724	2.417	0.005	nuc		PF04739; PF16561	5'-AMP-activated protein kinase beta subunit, interaction domain; Glycogen recognition site of AMP-activated protein kinase	PTHR10343	5.8e-87	AgB01_g538_t01-IPRSCAN	IPR006828; IPR013783; IPR014756; IPR037256; IPR032640	AssociationwiththeSNF1complex(ASC)domain; Immunoglobulin-likefold; ImmunoglobulinE-set; ASCdomainsuperfamily; AMP-activatedproteinkinase,glycogen-bindingdomain	N	-200.2	-	No					-1.00079	0.00560902
537	AgB01_g539_t01	5'-AMP-activated_protein_kinase_subunit_beta-2	Unknown product	Unknown			A	82	0	0		1	0	ExpAA=0.01 First60=0.01 PredHel=0 Topology=i	82	0						CYT		9.77	10.66			0.726	2.981	0.006	nuc	HHFRSKR|HY 0.642 *ProP*					AgB01_g539_t01-IPRSCAN			N	Too short sequence	-	No					-0.989417	0.00596772
538	AgB01_g540_t02	proton_myo-inositol_cotransporter	proton myo-inositol cotransporter - 12 predicted membrane helices	Transporters / membrane	NR	0	M	593	0	1		17	0	ExpAA=255.94 First60=22.79 PredHel=11 Topology=i21-43o99-116i123-145o160-182i187-209o280-302i319-338o348-370i461-483o498-520i527-549o	593	11	39.5	35.6	25			CYT		65.708	8.05			0.895	5.608	0.011	end		PF00083; PF00083	Sugar (and other) transporter; Sugar (and other) transporter	PTHR23500	4e-191	AgB01_g540_t02-IPRSCAN	IPR036259; IPR005829; IPR003663; IPR020846; IPR005828; IPR005829	MFStransportersuperfamily; Sugartransporter,conservedsite; Sugar/inositoltransporter; Majorfacilitatorsuperfamilydomain; Majorfacilitator,sugartransporter-like	N	-39.62	-	No					-0.957237	0.00711124
539	AgB01_g541_t01	hypothetical_protein	Unknown product - 4 predicted membrane helices	Unknown / membrane			M	215	0	0		6	0	ExpAA=89.53 First60=26.71 PredHel=4 Topology=i28-50o55-77i89-111o144-166i	215	4	40.9	17.7	41.4			CYT		23.917	5.69			0.307	0.741	0.001	end				PTHR12479	1e-25	AgB01_g541_t01-IPRSCAN			N	-134.55	-	No					-0.909523	0.0092183
540	AgB01_g542_t02	Solute_carrier_family_22_member_3	Solute carrier family 22 member 4 - probable fragment - 6 predicted membrane helices	Transporters / membrane	NR	0	M	273	0	0		7	0	ExpAA=126.97 First60=0.00 PredHel=6 Topology=i68-90o100-119i132-154o159-181i193-215o225-247i	273	6	47.3	9.2	43.6			CYT		30.523	9.5			0.447	1.415	0.003	end		PF00083	Sugar (and other) transporter	PTHR24064	1.4e-38	AgB01_g542_t02-IPRSCAN	IPR036259; IPR005828	MFStransportersuperfamily; Majorfacilitator,sugartransporter-like	N	-67.81	-	No					-0.88704	0.0104152
541	AgB01_g543_t01	Solute_carrier_family_22_member_3	Unknown product	Unknown			M	44	0	0	C(3.83)	4	0	ExpAA=0.00 First60=0.00 PredHel=0 Topology=o	44	0						CYT		5.258	7.72			0.784	3.436	0.007	mit						AgB01_g543_t01-IPRSCAN			N	Too short sequence	-	No					-0.480129	0.089259
542	AgB01_g544_t03	T._brucei_spp.-specific_protein	Unknown product	Unknown			M	182	0	1		8	0	ExpAA=1.81 First60=1.81 PredHel=0 Topology=o	182	0						CYT		20.519	9.01			0.849	4.398	0.009	nuc						AgB01_g544_t03-IPRSCAN			N	Too short sequence	-	No					-0.95736	0.00710645
543	AgB01_g545_t01	hypothetical_protein	Unknown product	Unknown			M	102	0	0		4	0	ExpAA=0.03 First60=0.03 PredHel=0 Topology=o	102	0						CYT		11.393	9.42			0.691	2.38	0.005	nuc						AgB01_g545_t01-IPRSCAN			N	Too short sequence	-	No					-0.981123	0.00624366
544	AgB01_g546_t01	neuropeptide_ff_receptor_2	neuropeptide ff receptor 2 - 7 predicted membrane helices	Signal Transduction / membrane	NR	0	M	421	0	1		12	0	ExpAA=159.01 First60=23.24 PredHel=7 Topology=o31-53i66-88o103-125i145-167o203-225i288-310o330-352i	421	7	36.6	24.2	39.2			CYT		47.197	9.75			0.498	0.985	0.002	end	SRRRVIR|LV 0.538 *ProP* ; RRERDKR|RT 0.510 *ProP*	PF00001	7 transmembrane receptor (rhodopsin family)	PTHR24230	1e-94	AgB01_g546_t01-IPRSCAN	IPR000276; IPR017452	Gprotein-coupledreceptor,rhodopsin-like; GPCR,rhodopsin-like,7TM	N	49.92	57.82	GPCR					-0.968831	0.0066761
545	AgB01_g547_t01	somatostatin_receptor_type_5	peptide binding - neuron projection - neuropeptide binding - integral component of membrane - membrane - neuropeptide signaling pathway - probable fragment - 7 predicted membrane helices	Signal Transduction / membrane	GO	0	M	489	0	1		16	0	ExpAA=149.96 First60=28.88 PredHel=7 Topology=o20-42i55-77o92-114i134-156o186-208i239-261o276-298i	489	7	31.5	16.4	52.1			BL	33-34	55.604	9.93	52.019	9.88	0.404	0.755	0.002	ves		PF00001	7 transmembrane receptor (rhodopsin family)	PTHR24229	1.5e-144	AgB01_g547_t01-IPRSCAN	IPR000276; IPR017452; IPR000276	Gprotein-coupledreceptor,rhodopsin-like; GPCR,rhodopsin-like,7TM	N	55.63	68.45	GPCR					-0.957655	0.00709507
546	AgB01_g548_t01	Craniofacial_development_protein_2,_partial	RNA-directed DNA polymerase from mobile element jockey-like - probable fragment	Transposable Elements	NR	0	M	630	0	0		7	0	ExpAA=0.00 First60=0.00 PredHel=0 Topology=o	630	0						CYT		72.444	9.69			0.324	5.492	0.011	nuc	LWARRKR|NK 0.615 *ProP*	PF00078; PF14529	Reverse transcriptase (RNA-dependent DNA polymerase); Endonuclease-reverse transcriptase	PTHR23227:SF45	8.5e-61	AgB01_g548_t01-IPRSCAN	IPR000477; IPR036691; IPR027124; IPR005135; IPR027124	Reversetranscriptasedomain; Endonuclease/exonuclease/phosphatasesuperfamily; SWR1-complexprotein5/Craniofacialdevelopmentprotein; Endonuclease/exonuclease/phosphatase	N	-189.62	-	No					-0.984647	0.00612491
547	AgB01_g549_t01	aminopeptidase_n	Unknown product	Unknown			M	205	0	0		2	0	ExpAA=1.33 First60=0.04 PredHel=0 Topology=o	205	0						CYT		23.229	8.46			0.446	0.846	0.002	nuc						AgB01_g549_t01-IPRSCAN			N	-228.03	-	No					-0.928238	0.00832669
548	AgB01_g550_t01	hypothetical_protein	Unknown product	Unknown			R	99	0	0		4	0	ExpAA=0.59 First60=0.59 PredHel=0 Topology=o	99	0						BL	19-20	11.6	9.07	9.383	8.73	0.903	2.1	0.004	mit						AgB01_g550_t01-IPRSCAN			N	Too short sequence	-	No					-0.85935	0.0121023
549	AgB01_g551_t01	hypothetical_protein	Cuticle collagen sqt-1	Extracellular Matrix	NR	0	M	284	0	1	G(3.62)P(3.97)	7	0	ExpAA=22.78 First60=22.78 PredHel=1 Topology=i7-29o	284	1	7.7	89.8	2.5		255	BL	24-25	28.628	8.72	26.257	8.52	0.625	0.438	0.001	nuc	IQRRIAR|KA 0.514 *ProP*	PF01391; PF01391; PF01391	Collagen triple helix repeat (20 copies); Collagen triple helix repeat (20 copies); Collagen triple helix repeat (20 copies)	PTHR43896	2.4e-75	AgB01_g551_t01-IPRSCAN	IPR008160; IPR008160	Collagentriplehelixrepeat	N	-177.68	-	No					-0.585605	0.0520995
550	AgB01_g552_t01	Uncharacterized_protein_U88	Unknown product - GPI anchored	Unknown / GPI			K	115	0	0	H(4.18)T(3.11)	5	0	ExpAA=0.00 First60=0.00 PredHel=0 Topology=o	115	0						CYT		13.327	9.76			0.891	5.446	0.011	nuc						AgB01_g552_t01-IPRSCAN			Y	Too short sequence	-	No					-0.96688	0.00674745
551	AgB01_g553_t01	intermediate_filament_protein_ifa-1	Nuclear envelope protein lamin intermediate filament superfamily	Nuclear Regulation	KOG	0	M	570	0	0		2	0	ExpAA=0.00 First60=0.00 PredHel=0 Topology=o	570	0						CYT		65.791	6.27			0.492	0.973	0.002	nuc	LGGRAPR|DS 0.504 *ProP*	PF00932; PF00038	Lamin Tail Domain; Intermediate filament protein	PTHR23239	1e-222	AgB01_g553_t01-IPRSCAN	IPR001322; IPR036415; IPR001664; IPR016451; IPR018039; IPR001664	Lamintaildomain; Lamintaildomainsuperfamily; Intermediatefilamentprotein; Intermediatefilament,ifa/ifb; Intermediatefilamentprotein,conservedsite	N	-238.5	-	No					-0.998794	0.00567031
552	AgB01_g554_t01	hypothetical_protein	signal transduction - integral component of membrane - membrane - G-protein coupled receptor signaling pathway - G-protein coupled receptor - 7 predicted membrane helices	Signal Transduction / membrane	GO	8e-60	M	344	0	0		14	0	ExpAA=147.19 First60=22.19 PredHel=7 Topology=o30-52i65-87o102-124i145-167o190-212i250-272o287-309i	344	7	44.8	24.1	31.1			CYT		39.445	8.79			0.654	1.748	0.003	end	TPGRVRR|EN 0.529 *ProP*	PF00001	7 transmembrane receptor (rhodopsin family)	PTHR21643	1.7e-72	AgB01_g554_t01-IPRSCAN	IPR000276; IPR017452	Gprotein-coupledreceptor,rhodopsin-like; GPCR,rhodopsin-like,7TM	N	62.21	75.23	GPCR					-0.937181	0.00793135
553	AgB01_g555_t03	pantothenate_kinase_4	Unknown product	Unknown			M	122	0	0		3	0	ExpAA=0.00 First60=0.00 PredHel=0 Topology=o	122	0						CYT		13.414	11.55			0.705	2.302	0.005	nuc	GSFRIRR|GA 0.650 *ProP*					AgB01_g555_t03-IPRSCAN			N	Too short sequence	-	No					-1.00487	0.00548544
554	AgB01_g556_t03	Terminal_uridylyltransferase_4	Unknown product	Unknown			M	230	0	1	W(4.29)	5	0	ExpAA=0.00 First60=0.00 PredHel=0 Topology=o	230	0						CYT		25.781	4.5			0.256	0.484	0.001	nuc	RRNRARR|CD 0.652 *ProP*					AgB01_g556_t03-IPRSCAN			N	-226.83	-	No					-0.954276	0.0072268
555	AgB01_g557_t04	hypothetical_protein	Unknown product	Unknown			M	332	0	0		6	0	ExpAA=0.31 First60=0.15 PredHel=0 Topology=o	332	0						CYT		37.957	9.06			0.787	3.279	0.007	cyt						AgB01_g557_t04-IPRSCAN			N	-115.99	-	No					-0.977231	0.00637751
556	AgB01_g558_t01	Cuticle_collagen_10	cuticle collagen	Extracellular Matrix	NR	0	M	307	0	0	G(3.71)P(3.06)	10	0	ExpAA=22.58 First60=22.58 PredHel=1 Topology=i7-29o	307	1	7.2	90.6	2.3		278	CYT		31.509	8.31			0.571	2.041	0.004	nuc	SIFRNKR|QN 0.617 *ProP*	PF01484	Nematode cuticle collagen N-terminal domain	PTHR43896	2.4e-77	AgB01_g558_t01-IPRSCAN	IPR002486; IPR002486	Nematodecuticlecollagen,N-terminal	N	-166.33	-	No					-0.665346	0.0342786
557	AgB01_g559_t01	hypothetical_protein	Unknown product	Unknown			M	285	0	1		4	0	ExpAA=0.00 First60=0.00 PredHel=0 Topology=o	285	0						CYT		32.799	8.28			0.531	1.187	0.002	cyt	QLSREGR|YV 0.609 *ProP*					AgB01_g559_t01-IPRSCAN			N	-183.32	-	No					-0.989836	0.00595411
558	AgB01_g560_t02	RecName:_Full=Collagen_alpha-2(IV)_chain;_Flags:_Precursor	collagen alpha-5(IV) chain-like - probable fragment	Extracellular Matrix	REFSEQ-INVERTEBRATE	3e-74	M	858	0	0	P(4.04)W(3.97)	14	0	ExpAA=0.00 First60=0.00 PredHel=0 Topology=o	858	0						CYT		93.267	9.14			0.188	0.375	0.001	nuc	WVRRVPR|VV 0.528 *ProP*			PTHR44092	1.1e-14	AgB01_g560_t02-IPRSCAN			N	-147.9	-	No					-0.885225	0.0105183
559	AgB01_g561_t02	RecName:_Full=Collagen_alpha-2(IV)_chain;_Flags:_Precursor	collagen alpha-5(IV) chain-like - probable fragment	Extracellular Matrix	REFSEQ-INVERTEBRATE	2e-49	M	482	0	0	G(4.64)P(3.42)	14	0	ExpAA=0.01 First60=0.00 PredHel=0 Topology=o	482	0						CYT		47.517	9.13			0.22	0.425	0.001	nuc						AgB01_g561_t02-IPRSCAN			N	-103.99	-	No					-0.994734	0.00579722
560	AgB01_g562_t01	myosin-8	Unknown product	Unknown			M	285	0	0		2	0	ExpAA=0.00 First60=0.00 PredHel=0 Topology=o	285	0						CYT		32.882	5.36			0.46	0.896	0.002	nuc		PF12325	TATA element modulatory factor 1 TATA binding			AgB01_g562_t01-IPRSCAN	IPR022091	TATAelementmodulatoryfactor1TATAbinding	N	-263.2	-	No					-0.911892	0.00910039
561	AgB01_g563_t01	myosin-8	Unknown product	Unknown			M	102	0	0		4	0	ExpAA=0.00 First60=0.00 PredHel=0 Topology=i	102	0						CYT		11.288	5.63			0.832	3.959	0.008	nuc						AgB01_g563_t01-IPRSCAN			N	Too short sequence	-	No					-0.893937	0.0100325
562	AgB01_g564_t04	uridine_diphosphate_glucose_pyrophosphatase	Unknown product	Unknown			M	448	0	2		14	0	ExpAA=0.17 First60=0.16 PredHel=0 Topology=o	448	0						CYT		49.819	8.4			0.5	1.015	0.002	nuc	SWHRVRK|SY 0.607 *ProP* ; SYYRHRR|SG 0.576 *ProP* ; RRHYLKR|DP 0.500 *ProP*					AgB01_g564_t04-IPRSCAN			N	-174.25	-	No					-0.959532	0.00702289
563	AgB01_g565_t07	hypothetical_protein	Unknown product	Unknown			M	190	0	0		5	0	ExpAA=0.01 First60=0.00 PredHel=0 Topology=o	190	0						CYT		22.058	5.66			0.836	4.083	0.008	mit	GSFRWSR|IA 0.522 *ProP*					AgB01_g565_t07-IPRSCAN			N	Too short sequence	-	No					-0.941277	0.00775658
564	AgB01_g566_t01	Zinc_finger_protein_79	zinc finger protein 79 - probable fragment	Uncharacterized	NR	2e-95	M	270	0	0		10	0	ExpAA=0.00 First60=0.00 PredHel=0 Topology=o	270	0						CYT		30.677	9.66			0.838	4.066	0.008	nuc		PF00096; PF00096; PF12874	Zinc finger, C2H2 type; Zinc finger, C2H2 type; Zinc-finger of C2H2 type	PTHR24376	2.3e-41	AgB01_g566_t01-IPRSCAN	IPR013087; IPR036236; IPR013087	ZincfingerC2H2-type; ZincfingerC2H2superfamily	N	-180.4	-	No					-0.987466	0.00603151
565	AgB01_g567_t01	hypothetical_protein	Unknown product	Unknown			M	396	0	0		11	0	ExpAA=10.64 First60=0.00 PredHel=0 Topology=o	396	0						CYT		45.178	5.01			0.804	3.292	0.007	nuc				PTHR14611	3.2e-23	AgB01_g567_t01-IPRSCAN			N	-98.23	-	No					-0.984672	0.00612406
566	AgB01_g568_t02	cathepsin_b-like_cysteine_proteinase_6	cathepsin b-like cysteine proteinase 6 - probable fragment	Post-translational Modifications / protease	NR	0	M	286	0	0	W(3.13)	15	0	ExpAA=0.00 First60=0.00 PredHel=0 Topology=o	286	0						CYT		32.317	5.11			0.672	1.794	0.004	cyt		PF00112	Papain family cysteine protease	PTHR12411:SF547	1.1e-58	AgB01_g568_t02-IPRSCAN	IPR000668; IPR000169; IPR013128; IPR000668	PeptidaseC1A,papainC-terminal; Cysteinepeptidase,cysteineactivesite; PeptidaseC1A	N	-133.61	-	No					-0.548011	0.0632724
567	AgB01_g569_t04	Na(+)/H(+)_antiporter_nhx-3	Na(+)/H(+) antiporter nhx-3 - probable fragment - 3 predicted membrane helices	Transporters / membrane	NR	1e-95	S	215	0	0		7	0	ExpAA=65.16 First60=26.36 PredHel=3 Topology=o31-53i70-89o99-116i	215	3	27	19.1	54			CYT		23.803	8.49			0.359	0.708	0.001	end		PF00999	Sodium/hydrogen exchanger family	PTHR10110:SF98	3.9e-69	AgB01_g569_t04-IPRSCAN	IPR018422; IPR006153	Cation/H+exchanger,CPA1family; Cation/H+exchanger	N	-139.36	-	No					-0.94895	0.00743937
568	AgB01_g570_t01	hypothetical_protein	Unknown product	Unknown			M	108	0	1		3	0	ExpAA=0.09 First60=0.09 PredHel=0 Topology=o	108	0						CYT		12.426	9.35			0.757	3.343	0.007	nuc						AgB01_g570_t01-IPRSCAN			N	Too short sequence	-	No					-1.01228	0.00526821
569	AgB01_g571_t09	Alpha-1,3-mannosyl-glycoprotein_4-beta-N-acetylglucosaminyltransferase_A,_partial	Alpha-13-mannosyl-glycoprotein 4-beta-N-acetylglucosaminyltransferase A - signalP detected	Carbohydrate Metabolism	NR	0	M	522	0	1		5	0	ExpAA=29.55 First60=21.95 PredHel=1 Topology=i27-49o	522	1	4.2	90.6	5.2		473	SIG	46-47	59.846	8.35	54.42	6.38	0.633	1.573	0.003	mit		PF04666	N-Acetylglucosaminyltransferase-IV (GnT-IV) conserved region	PTHR12062:SF9	3.7e-135	AgB01_g571_t09-IPRSCAN	IPR006759; IPR008979; IPR006759	Glycosyltransferasefamily54; Galactose-binding-likedomainsuperfamily	N	-134.91	-	No					-0.978066	0.00634854
570	AgB01_g572_t01	putative_g-protein_coupled_receptor_tkr-1	Unknown product	Unknown			V	148	0	1		6	0	ExpAA=0.22 First60=0.08 PredHel=0 Topology=o	148	0						CYT		17.34	10.44			0.812	3.583	0.007	mit						AgB01_g572_t01-IPRSCAN			N	Too short sequence	-	No					-0.911414	0.00912405
571	AgB01_g573_t07	tRNA_guanosine-2'-O-methyltransferase_TRM11	RNA methylase	Nuclear Regulation	KOG	0	M	445	0	3		11	0	ExpAA=2.69 First60=0.00 PredHel=0 Topology=o	445	0						CYT		50.661	8.5			0.625	1.526	0.003	cyt		PF01170	Putative RNA methylase family UPF0020	PTHR13370:SF3	1.3e-107	AgB01_g573_t07-IPRSCAN	IPR000241; IPR029063; IPR002052; IPR016691	PutativeRNAmethylasedomain; S-adenosyl-L-methionine-dependentmethyltransferase; DNAmethylase,N-6adenine-specific,conservedsite; tRNAguanosine-2'-O-methyltransferase,TRM11	N	-160.55	-	No					-0.992709	0.0058616
572	AgB01_g574_t09	Esterase	Acetylcholinesterase/Butyrylcholinesterase	Signal Transduction	KOG	4e-70	M	565	0	2		12	0	ExpAA=0.04 First60=0.00 PredHel=0 Topology=o	565	0						CYT		64.254	8.86			0.441	1.494	0.003	cyt		PF00135	Carboxylesterase family	PTHR44590	1.3e-175	AgB01_g574_t09-IPRSCAN	IPR029058; IPR019819; IPR002018	Alpha/Betahydrolasefold; CarboxylesterasetypeB,conservedsite; Carboxylesterase,typeB	N	-180.24	-	No					-0.881256	0.0107472
573	AgB01_g575_t02	Aromatic-amino-acid_aminotransferase_1	Kynurenine/alpha-aminoadipate aminotransferase mitochondrial - probable fragment	Amino Acid Metabolism	NR	4e-55	M	300	0	1		4	0	ExpAA=0.60 First60=0.24 PredHel=0 Topology=o	300	0						CYT		33.694	9.34			0.777	3.084	0.006	mit		PF00155	Aminotransferase class I and II	PTHR42858	1.2e-47	AgB01_g575_t02-IPRSCAN	IPR015424; IPR015421; IPR004839; IPR015422	Pyridoxalphosphate-dependenttransferase; Pyridoxalphosphate-dependenttransferase,majordomain; Aminotransferase,classI/classII; Pyridoxalphosphate-dependenttransferasedomain1	N	-143.92	-	No					-0.812289	0.0156099
574	AgB01_g576_t01	Uncharacterized_protein_YER152C	Unknown product	Unknown			M	118	0	1		3	0	ExpAA=15.64 First60=0.07 PredHel=0 Topology=o	118	0						CYT		13.01	6.71			0.262	0.44	0.001	cyt				PTHR42858	8.1e-21	AgB01_g576_t01-IPRSCAN	IPR015421; IPR015424	Pyridoxalphosphate-dependenttransferase,majordomain; Pyridoxalphosphate-dependenttransferase	N	Too short sequence	-	No					-0.942641	0.0076992
575	AgB01_g577_t06	Innexin_unc-9	Unknown product - 2 predicted membrane helices	Unknown / membrane			M	158	0	1	W(3.4)	6	0	ExpAA=43.85 First60=21.78 PredHel=2 Topology=i24-46o103-125i	158	2	27.8	36.1	36.1			CYT		18.44	5.25			0.404	0.93	0.002	end		PF00876	Innexin	PTHR11893:SF36	3.3e-31	AgB01_g577_t06-IPRSCAN	IPR000990; IPR000990	Innexin	N	Too short sequence	-	No					-1.00946	0.00534989
576	AgB01_g578_t01	Maleylacetoacetate_isomerase_2	Glutathione S-transferase	Detoxification	KOG	6e-77	M	218	0	0		4	0	ExpAA=0.02 First60=0.00 PredHel=0 Topology=o	218	0						CYT		24.409	8.55			0.719	2.534	0.005	mit		PF02798	Glutathione S-transferase, N-terminal domain	PTHR42673:SF4	1.8e-82	AgB01_g578_t01-IPRSCAN	IPR034330; IPR034333; IPR036282; IPR005955; IPR036249; IPR004045; IPR010987; IPR004045	GlutathioneS-transferases,classZeta,C-terminal; GlutathioneS-transferases,classZeta,N-terminal; GlutathioneS-transferase,C-terminaldomainsuperfamily; GlutathioneS-transferases,classZeta; Thioredoxin-likesuperfamily; GlutathioneS-transferase,N-terminal; GlutathioneS-transferase,C-terminal-like	N	-230.31	-	No					-0.96927	0.00666017
577	AgB01_g579_t01	putative_maleylacetoacetate_isomerase_2	Unknown product	Unknown			M	58	0	0	W(4.64)	1	0	ExpAA=0.00 First60=0.00 PredHel=0 Topology=o	58	0						CYT		7.19	11.65			0.587	1.524	0.003	nuc						AgB01_g579_t01-IPRSCAN			N	Too short sequence	-	No					-1.02016	0.00504668
578	AgB01_g580_t04	hypothetical_protein	Unknown product	Unknown			M	261	0	1		8	0	ExpAA=0.11 First60=0.00 PredHel=0 Topology=o	261	0						CYT		29.731	11.03			0.804	3.285	0.007	nuc						AgB01_g580_t04-IPRSCAN			N	-197.73	-	No					-0.939108	0.00784864
579	AgB01_g581_t01	Tubulin_alpha-2_chain	tubulin alpha-3 chain	Cytoskeletal	NR	0	M	459	0	0		16	0	ExpAA=0.02 First60=0.00 PredHel=0 Topology=o	459	0						CYT		51.563	4.75			0.447	0.859	0.002	cyt		PF03953; PF00091	Tubulin C-terminal domain; Tubulin/FtsZ family, GTPase domain	PTHR11588:SF248	1.9e-203	AgB01_g581_t01-IPRSCAN	IPR018316; IPR003008; IPR002452; IPR036525; IPR000217; IPR037103; IPR017975; IPR008280; IPR023123; IPR013838; IPR018316	Tubulin/FtsZ,2-layersandwichdomain; Tubulin/FtsZ,GTPasedomain; Alphatubulin; Tubulin/FtsZ,GTPasedomainsuperfamily; Tubulin; Tubulin/FtsZ,C-terminaldomainsuperfamily; Tubulin,conservedsite; Tubulin/FtsZ,C-terminal; Tubulin,C-terminal; Betatubulin,autoregulationbindingsite	N	-139.03	-	No					-0.642842	0.0386069
580	AgB01_g582_t05	protein_zwilch-like_protein	Unknown product	Unknown			M	341	0	1		4	0	ExpAA=0.10 First60=0.00 PredHel=0 Topology=o	341	0						CYT		38.99	6.14			0.622	1.498	0.003	nuc		PF09817	RZZ complex, subunit zwilch	PTHR15995	2.2e-29	AgB01_g582_t05-IPRSCAN	IPR018630; IPR018630	RZZcomplex,subunitZwilch	N	-118.19	-	No					-0.998135	0.00569074
581	AgB01_g583_t01	hypothetical_protein	hypothetical protein LOAG_04535 (Loa loa)	Uncharacterized	NR	7e-27	M	190	0	0		5	0	ExpAA=0.01 First60=0.00 PredHel=0 Topology=o	190	0						CYT		21.452	4.67			0.501	0.998	0.002	cyt						AgB01_g583_t01-IPRSCAN			N	Too short sequence	-	No					-0.947591	0.00749457
582	AgB01_g584_t01	HD_domain-containing_protein_2	HD domain-containing protein 2 - extracellular exosome - mitochondrion - protein binding	Protein Export	GO	7e-32	M	188	0	0		2	0	ExpAA=0.00 First60=0.00 PredHel=0 Topology=o	188	0						CYT		22.248	5.25			0.615	1.562	0.003	cyt		PF13023	HD domain	PTHR11845	1.1e-62	AgB01_g584_t01-IPRSCAN	IPR006674; IPR003607; IPR003607	HDdomain; HD/PDEasedomain	N	Too short sequence	-	No					-1.01507	0.00518873
583	AgB01_g585_t05	60S_ribosomal_protein_L10	Unknown product	Unknown			M	123	0	0		7	0	ExpAA=0.19 First60=0.18 PredHel=0 Topology=i	123	0						CYT		14.071	10.18			0.764	3.853	0.008	nuc						AgB01_g585_t05-IPRSCAN			N	Too short sequence	-	No					-1.01181	0.00528187
584	AgB01_g586_t04	60S_ribosomal_protein_L10	60s ribosomal protein l10	Protein Synthesis	NR	0	K	217	0	1		7	0	ExpAA=0.00 First60=0.00 PredHel=0 Topology=o	217	0						CYT		25.21	10.05			0.627	1.78	0.004	mit	PKSRFCR|GV 0.561 *ProP*	PF00252	Ribosomal protein L16p/L10e	PTHR11726	1.6e-119	AgB01_g586_t04-IPRSCAN	IPR018255; IPR036920; IPR001197; IPR016180; IPR016180	RibosomalproteinL10e,conservedsite; RibosomalproteinL10e/L16superfamily; RibosomalproteinL10e; RibosomalproteinL10e/L16	N	-295.54	-	No					-1.00724	0.00541497
585	AgB01_g587_t09	Sucrase-isomaltase	Maltase glucoamylase - probable fragment	Carbohydrate Metabolism	KOG	2e-71	M	306	0	0		5	0	ExpAA=0.01 First60=0.00 PredHel=0 Topology=o	306	0						CYT		34.886	5.34			0.586	1.337	0.003	cyt		PF01055	Glycosyl hydrolases family 31	PTHR22762:SF94	8e-110	AgB01_g587_t09-IPRSCAN	IPR000322; IPR030458; IPR017853; IPR017853	Glycosidehydrolasefamily31; Glycosylhydrolasesfamily31,activesite; Glycosidehydrolasesuperfamily	N	-147.61	-	No					-0.883745	0.0106031
586	AgB01_g588_t01	Structural_maintenance_of_chromosomes_protein_1A	structural maintenance of chromosomes protein 1a - probable fragment	Uncharacterized	NR	0	M	263	0	0		6	0	ExpAA=0.00 First60=0.00 PredHel=0 Topology=o	263	0						CYT		30.371	5.9			0.595	1.36	0.003	nuc		PF06470	SMC proteins Flexible Hinge Domain	PTHR18937	3e-81	AgB01_g588_t01-IPRSCAN	IPR010935; IPR036277	SMCsflexiblehinge; SMCsflexiblehingesuperfamily	N	-237.92	-	No					-0.960042	0.00700344
587	AgB01_g589_t01	hypothetical_protein	Unknown product	Unknown			M	402	0	0		16	0	ExpAA=5.21 First60=0.01 PredHel=0 Topology=o	402	0						CYT		45.958	9.26			0.825	3.811	0.008	nuc	IPERSGR|NV 0.572 *ProP*					AgB01_g589_t01-IPRSCAN			N	-118.1	-	No					-0.978342	0.006339
588	AgB01_g590_t02	Nitrogen_permease_regulator_2-like_protein,_partial	Nitrogen permease regulator NLRG/NPR2	Transporters	KOG	0	M	412	0	0		13	0	ExpAA=0.28 First60=0.00 PredHel=0 Topology=o	412	0						CYT		47.115	8.66			0.43	0.827	0.002	cyt		PF06218; PF06218	Nitrogen permease regulator 2; Nitrogen permease regulator 2	PTHR12991	9.6e-119	AgB01_g590_t02-IPRSCAN	IPR009348; IPR009348	Nitrogenpermeaseregulator2	N	-154.68	-	No					-0.974609	0.00646924
589	AgB01_g591_t10	DNA-directed_RNA_polymerase_III_subunit_RPC1	RNA polymerase I large subunit	Transcription Machinery	KOG	0	M	1358	0.0736377	4	X(10.84)	36	0.0736377	ExpAA=2.66 First60=0.00 PredHel=0 Topology=o	1358	0						CYT		151.443	8.97			0.258	0.488	0.001	nuc		PF04998; PF04983; PF05000; PF00623; PF04997	RNA polymerase Rpb1, domain 5; RNA polymerase Rpb1, domain 3; RNA polymerase Rpb1, domain 4; RNA polymerase Rpb1, domain 2; RNA polymerase Rpb1, domain 1	PTHR19376	0	AgB01_g591_t10-IPRSCAN	IPR006592; IPR035698; IPR007081; IPR007066; IPR038120; IPR007083; IPR000722; IPR035697; IPR007080	RNApolymerase,N-terminal; DNA-directedRNApolymeraseIIIsubunitRPC1,C-terminal; RNApolymeraseRpb1,domain5; RNApolymeraseRpb1,domain3; RNApolymeraseRpb1,funneldomainsuperfamily; RNApolymeraseRpb1,domain4; RNApolymerase,alphasubunit; DNA-directedRNApolymeraseIIIsubunitRPC1,N-terminal; RNApolymeraseRpb1,domain1	N	-200.57	-	No					-0.978939	0.00631842
590	AgB01_g592_t01	Transthyretin-like_protein_5	Conserved secreted protein precursor	Secreted / Uncharacterized	CDD	7e-73	M	138	0	0		5	0	ExpAA=2.56 First60=2.54 PredHel=0 Topology=o	138	0						SIG	17-18	15.246	8.26	13.354	8.38	0.781	3.243	0.006	mit		PF01060	Transthyretin-like family	PTHR21700	1e-34	AgB01_g592_t01-IPRSCAN	IPR001534; IPR038479; IPR001534	Transthyretin-like; Transthyretin-likesuperfamily	N	Too short sequence	-	No					-1.02946	0.00479676
591	AgB01_g593_t03	Cuticlin-1	Unknown product	Unknown			M	231	0	2		8	0	ExpAA=22.85 First60=0.01 PredHel=1 Topology=o200-222i	231	1	9.5	86.6	3.9		9	CYT		26.265	8.1			0.558	1.323	0.003	nuc	SCGRNKR|EI 0.597 *ProP*			PTHR22907	8.8e-34	AgB01_g593_t03-IPRSCAN	IPR001507	Zonapellucidadomain	N	-177.61	-	No					-0.914511	0.0089718
592	AgB01_g594_t01	transthyretin-like_protein_5	Transthyretin-like protein 46	Uncharacterized	NR	9e-50	M	164	0	0		4	0	ExpAA=20.68 First60=20.68 PredHel=1 Topology=i23-45o	164	1	13.4	72.6	14		119	BL	36-37	18.177	6.1	13.978	4.72	0.742	3.033	0.006	mit		PF01060	Transthyretin-like family	PTHR21700	4.1e-26	AgB01_g594_t01-IPRSCAN	IPR001534; IPR038479; IPR001534	Transthyretin-like; Transthyretin-likesuperfamily	N	Too short sequence	-	No					-1.04335	0.00444674
593	AgB01_g595_t01	Stress-associated_endoplasmic_reticulum_protein_2	Unknown product - GPI anchored	Unknown / GPI			M	77	0	0		4	0	ExpAA=10.20 First60=6.98 PredHel=0 Topology=o	77	0						CYT		8.942	9.43			0.873	4.904	0.01	mit						AgB01_g595_t01-IPRSCAN			Y	Too short sequence	-	No					-1.00625	0.00544441
594	AgB01_g596_t02	hypothetical_protein	hypothetical secreted protein precursor	Secreted / Unknown			F	184	0	0	C(3.2)	14	0	ExpAA=20.93 First60=20.91 PredHel=1 Topology=o5-27i	184	1	12	2.7	85.3		157	SIG	23-24	20.807	8.7	18.365	8.7	0.423	0.892	0.002	nuc				PTHR35017	8.6e-47	AgB01_g596_t02-IPRSCAN			N	Too short sequence	-	No					-0.886031	0.0104724
595	AgB01_g597_t01	Cysteine_synthase	cysteine synthase/L-3-cyanoalanine synthase	Amino Acid Metabolism	PRK	0	M	338	0	1		4	0	ExpAA=0.62 First60=0.00 PredHel=0 Topology=o	338	0						CYT		36.089	7.58			0.298	0.367	0.001	cyt		PF00291	Pyridoxal-phosphate dependent enzyme	PTHR10314	1.3e-151	AgB01_g597_t01-IPRSCAN	IPR001926; IPR001216; IPR036052; IPR005859; IPR005856	Pyridoxal-phosphatedependentenzyme; Cysteinesynthase/cystathioninebeta-synthase,pyridoxal-phosphateattachmentsite; Tryptophansynthasebetasubunit-likePLP-dependentenzyme; CysteinesynthaseCysK; Cysteinesynthase	N	-132.44	-	No					-0.955527	0.00717772
596	AgB01_g598_t02	Zinc_metalloproteinase_nas-37,_partial	Zinc metalloproteinase nas-37 - probable fragment	Post-translational Modifications / protease	NR	1e-44	S	213	0	0		4	0	ExpAA=0.03 First60=0.00 PredHel=0 Topology=o	213	0						CYT		24.073	6.78			0.371	3.282	0.007	cyt		PF01400	Astacin (Peptidase family M12A)	PTHR45240	4.2e-33	AgB01_g598_t02-IPRSCAN	IPR001506; IPR024079; IPR006026; IPR001506	PeptidaseM12A; Metallopeptidase,catalyticdomainsuperfamily; Peptidase,metallopeptidase	N	-176.72	-	No					-0.98681	0.00605312
597	AgB01_g599_t01	Zinc_metalloproteinase_nas-37	Zinc metalloproteinase nas-37 - probable fragment - signalP detected	Secreted / Protease	NR	2e-62	A	200	0	0		14	0	ExpAA=1.52 First60=1.52 PredHel=0 Topology=o	200	0						SIG	20-21	22.107	9.21	20.233	9.21	0.8	3.345	0.007	mit	CYSRDRR|CS 0.605 *ProP*	PF00090	Thrombospondin type 1 domain			AgB01_g599_t01-IPRSCAN	IPR000884; IPR036383; IPR000884	Thrombospondintype-1(TSP1)repeat; Thrombospondintype-1(TSP1)repeatsuperfamily	N	Too short sequence	-	No					-0.980345	0.00627019
598	AgB01_g600_t03	small_conductance_calcium-activated_potassium_channel_protein	Protein CBR-KCNL-3 - neuronal cell body - small conductance calcium-activated potassium channel - plasma membrane - calmodulin binding - 6 predicted membrane helices	Transporters / membrane	GO	0	M	659	0	0		9	0	ExpAA=137.79 First60=0.06 PredHel=6 Topology=i259-281o291-313i377-399o436-455i468-487o497-519i	659	6	19.1	8.6	72.2			CYT		74.229	9.82			0.222	0.5	0.001	end	SFDRLKR|NN 0.513 *ProP*	PF02888; PF07885; PF03530	Calmodulin binding domain; Ion channel; Calcium-activated SK potassium channel	PTHR10153	1.9e-269	AgB01_g600_t03-IPRSCAN	IPR015449; IPR004178; IPR013099; IPR036122; IPR015449	Potassiumchannel,calcium-activated,SK; Calmodulin-bindingdomain; Potassiumchanneldomain; SK,calmodulin-bindingdomainsuperfamily	N	-48.96	-	No					-0.945698	0.00757218
599	AgB01_g601_t01	soluble_calcium-activated_nucleotidase_1	Cell surface ATP diphosphohydrolase Apyrase	Nuclear Metabolism	KOG	0	M	381	0	0		2	0	ExpAA=20.05 First60=19.96 PredHel=1 Topology=o29-51i	381	1	5.8	7.6	86.6		330	CYT		42.537	7.1			0.203	0.405	0.001	mit		PF06079	Apyrase	PTHR13023	3.1e-135	AgB01_g601_t01-IPRSCAN	IPR036258; IPR009283; IPR009283	Apyrasesuperfamily; Apyrase	N	-133.02	-	No					-0.965822	0.00678641
600	AgB01_g602_t05	ctr_copper_transporter	Ctr copper transporter family protein (Necator americanus) - 3 predicted membrane helices	Transporters / membrane	NR	1e-55	M	287	0	0		6	0	ExpAA=63.08 First60=0.01 PredHel=3 Topology=o127-149i223-245o249-271i	287	3	23	45.6	31.4			BL	144-145	31.581	5.87	15.686	5.78	0.715	3.564	0.007	end		PF04145	Ctr copper transporter family	PTHR12483:SF27	1.1e-44	AgB01_g602_t05-IPRSCAN	IPR007274; IPR007274	Ctrcoppertransporter	N	-70.04	-	No					-0.98782	0.0060199
601	AgB01_g603_t01	fatty_acid-binding_protein-like_protein	fatty acid-binding protein-like protein - signalP detected	Lipid Metabolism	NR	7e-92	V	181	0	1		1	0	ExpAA=21.88 First60=21.74 PredHel=1 Topology=o15-37i	181	1	12.2	8.3	79.6		144	SIG	37-38	21.134	8.53	17.053	6.83	0.126	4.498	0.009	nuc				PTHR22725	1.3e-33	AgB01_g603_t01-IPRSCAN	IPR000463; IPR012674; IPR012674	Cytosolicfatty-acidbinding; Calycin	N	Too short sequence	-	No					-0.912105	0.00908988
602	AgB01_g604_t01	fatty_acid-binding_protein-like_protein	Unknown product	Unknown			M	90	0	0		3	0	ExpAA=7.35 First60=7.34 PredHel=0 Topology=i	90	0						CYT		10.999	9.91			0.722	0.393	0.001	mit						AgB01_g604_t01-IPRSCAN			N	Too short sequence	-	No					-0.712965	0.0266106
603	AgB01_g605_t11	RecName:_Full=Fatty_acid-binding_protein_homolog;_AltName:_Full=AS-P18;_Flags:_Precursor	Fatty acid-binding protein homolog - probable fragment	Lipid Metabolism	SWISSP	5e-62	M	112	0	2		0	0	ExpAA=0.00 First60=0.00 PredHel=0 Topology=o	112	0						CYT		13.189	6.91			0.739	1.571	0.003	nuc				PTHR22725	2.8e-29	AgB01_g605_t11-IPRSCAN	IPR000463; IPR012674; IPR012674	Cytosolicfatty-acidbinding; Calycin	N	Too short sequence	-	No					-0.981327	0.00623672
604	AgB01_g606_t01	RecName:_Full=Fatty_acid-binding_protein_homolog;_AltName:_Full=AS-P18;_Flags:_Precursor	Unknown product	Unknown			V	36	0	0		0	0	ExpAA=0.00 First60=0.00 PredHel=0 Topology=o	36	0						CYT		4.186	4.81			#N/A	#N/A	#N/A	cyt						AgB01_g606_t01-IPRSCAN	IPR000463; IPR012674; IPR012674	Cytosolicfatty-acidbinding; Calycin	N	Too short sequence	-	No					-0.913618	0.00901543
605	AgB01_g607_t03	Fatty_acid-binding_protein_3	Fatty acid-binding -like protein 3 - signalP detected	Lipid Metabolism	NR	3e-67	M	157	0	2		0	0	ExpAA=5.29 First60=5.23 PredHel=0 Topology=o	157	0						SIG	24-25	18.075	5.61	15.425	5.36	0.817	3.789	0.008	exc				PTHR22725:SF4	4.4e-44	AgB01_g607_t03-IPRSCAN	IPR012674; IPR000463; IPR012674	Calycin; Cytosolicfatty-acidbinding	N	Too short sequence	-	No					-0.86938	0.0114621
606	AgB01_g608_t02	serine_threonine-protein_phosphatase_4_regulatory_subunit_2	serine threonine-protein phosphatase 4 regulatory subunit 2 - probable fragment	Signal Transduction	NR	0	M	234	0	0		3	0	ExpAA=0.00 First60=0.00 PredHel=0 Topology=o	234	0						CYT		26.617	4.44			0.343	0.642	0.001	nuc		PF09184	PPP4R2	PTHR16487	1.3e-26	AgB01_g608_t02-IPRSCAN	IPR015267; IPR015267	Proteinphosphatase4coreregulatorysubunitR2	N	-295.44	-	No					-0.967556	0.00672263
607	AgB01_g609_t01	serine_threonine-protein_phosphatase_4_regulatory_subunit_2	Unknown product	Unknown			M	93	0	0		4	0	ExpAA=0.88 First60=0.53 PredHel=0 Topology=o	93	0						CYT		10.788	9.83			0.845	4.095	0.008	nuc						AgB01_g609_t01-IPRSCAN			N	Too short sequence	-	No					-0.937163	0.00793215
608	AgB01_g610_t03	importin-7	Unknown product	Unknown			M	100	0	0		1	0	ExpAA=0.22 First60=0.22 PredHel=0 Topology=o	100	0						CYT		11.678	10.77			0.784	2.949	0.006	nuc						AgB01_g610_t03-IPRSCAN			N	Too short sequence	-	No					-0.887106	0.0104115
609	AgB01_g611_t04	importin-7	moleskin - signal transduction - nuclear envelope - protein transporter - nucleoplasm - cytosol - muscle attachment - probable fragment	Signal Transduction	GO	4e-33	M	273	0	0		4	0	ExpAA=0.03 First60=0.02 PredHel=0 Topology=o	273	0						CYT		30.302	4.29			0.496	1.084	0.002	nuc				PTHR10997	3e-26	AgB01_g611_t04-IPRSCAN	IPR011989; IPR016024; IPR016024	Armadillo-likehelical; Armadillo-typefold	N	-184.94	-	No					-0.991051	0.0059148
610	AgB01_g612_t10	hypothetical_protein	Unknown product	Unknown			M	163	0	0		5	0	ExpAA=0.00 First60=0.00 PredHel=0 Topology=o	163	0						CYT		18.163	5.8			0.714	2.188	0.004	nuc						AgB01_g612_t10-IPRSCAN			N	Too short sequence	-	No					-0.995923	0.00575976
611	AgB01_g613_t01	hypothetical_protein	Unknown product	Unknown			R	72	0	0		0	0	ExpAA=0.00 First60=0.00 PredHel=0 Topology=o	72	0						CYT		8.182	8.39			0.592	1.649	0.003	cyt						AgB01_g613_t01-IPRSCAN			N	Too short sequence	-	No					-0.985889	0.00608359
612	AgB01_g614_t01	3-hydroxyacyl-CoA_dehydratase_3	very-long-chain (3R)-3-hydroxyacyl-CoA dehydratase 3 isoform X1 (Homo sapiens) - probable fragment - 3 predicted membrane helices	Lipid Metabolism / membrane	Sigp		M	153	0	1		1	0	ExpAA=65.78 First60=21.00 PredHel=3 Topology=o30-52i65-87o112-134i	153	3	43.1	35.9	20.9			CYT		18.196	9.57			0.077	0.172	0	end	EELRKKR|E- 0.503 *ProP*	PF04387	Protein tyrosine phosphatase-like protein, PTPLA	PTHR11035:SF23	1.8e-44	AgB01_g614_t01-IPRSCAN	IPR007482; IPR007482	Protein-tyrosinephosphatase-like,PTPLA	N	Too short sequence	-	No					-0.968072	0.00670377
613	AgB01_g615_t02	hypothetical_protein	Unknown product	Unknown			M	59	0	0		4	0	ExpAA=21.41 First60=21.41 PredHel=1 Topology=o15-37i	59	1	37.3	25.4	37.3		22	BL/ANC		6.707	9.34			0.65	1.867	0.004	mit						AgB01_g615_t02-IPRSCAN			N	Too short sequence	-	No					-0.981845	0.00621917
614	AgB01_g616_t02	atp-dependent_rna_helicase_dhx8	mRNA splicing factor ATP-dependent RNA helicase - probable fragment	Transcription Machinery	KOG	0	M	2311	0	9		65	0	ExpAA=0.00 First60=0.00 PredHel=0 Topology=o	2311	0						CYT		261.09	5.96			0.313	0.584	0.001	nuc	TVSRRCR|VV 0.526 *ProP*	PF00271; PF00270; PF01485; PF01485; PF07717; PF04408	Helicase conserved C-terminal domain; DEAD/DEAH box helicase; IBR domain, a half RING-finger domain; IBR domain, a half RING-finger domain; Oligonucleotide/oligosaccharide-binding (OB)-fold; Helicase associated domain (HA2)	PTHR18934	5.1e-143	AgB01_g616_t02-IPRSCAN	IPR002464; IPR001650; IPR014001; IPR007502; IPR011545; IPR001841; IPR013083; IPR027417; IPR002867; IPR011709; IPR007502	DNA/RNAhelicase,ATP-dependent,DEAH-boxtype,conservedsite; Helicase,C-terminal; Helicasesuperfamily1/2,ATP-bindingdomain; Helicase-associateddomain; DEAD/DEAHboxhelicasedomain; Zincfinger,RING-type; Zincfinger,RING/FYVE/PHD-type; P-loopcontainingnucleosidetriphosphatehydrolase; IBRdomain; DomainofunknownfunctionDUF1605	N	-259.71	-	No					-0.96437	0.00684031
615	AgB01_g617_t01	atp-dependent_rna_helicase_dhx8	hypothetical secreted protein precursor	Secreted / Unknown			M	639	0.156495	5	X(23.05)	20	0.156495	ExpAA=0.15 First60=0.15 PredHel=0 Topology=o	639	0						SIG	20-21	72.341	5.93	69.934	5.8	0.646	1.879	0.004	mit						AgB01_g617_t01-IPRSCAN			N	-129.93	-	No					-0.946612	0.00753461
616	AgB01_g618_t03	atp-dependent_rna_helicase_dhx8	E3 ubiquitin ligase - probable fragment	Proteasome	KOG	6e-17	M	676	0	3		29	0	ExpAA=0.00 First60=0.00 PredHel=0 Topology=o	676	0						CYT		77.22	5.26			0.487	1.007	0.002	cyt	EDERKRR|QY 0.567 *ProP*	PF01485; PF01485	IBR domain, a half RING-finger domain; IBR domain, a half RING-finger domain	PTHR11685:SF217	9.3e-33	AgB01_g618_t03-IPRSCAN	IPR001841; IPR002867; IPR031127	Zincfinger,RING-type; IBRdomain; E3ubiquitinligaseRBRfamily	N	-165.41	-	No					-0.960856	0.00697246
617	AgB01_g619_t02	26S_proteasome_non-ATPase_regulatory_subunit_1	26S proteasome regulatory complex subunit RPN2/PSMD1 - probable fragment	Proteasome	KOG	0	M	494	0	1		7	0	ExpAA=10.14 First60=9.52 PredHel=0 Topology=o	494	0						CYT		54.315	6.66			0.43	0.806	0.002	cyt		PF13646	HEAT repeats	PTHR10943	2.9e-180	AgB01_g619_t02-IPRSCAN	IPR011989; IPR035266; IPR016024	Armadillo-likehelical; 26SProteasomenon-ATPaseregulatorysubunit1; Armadillo-typefold	N	-100.77	-	No					-0.959218	0.00703494
618	AgB01_g620_t01	26S_proteasome_non-ATPase_regulatory_subunit_1	26S proteasome non-ATPase regulatory subunit 1 - probable fragment - GPI anchored	Proteasome / GPI	NR	0	N	510	0	1		5	0	ExpAA=0.41 First60=0.00 PredHel=0 Topology=o	510	0						CYT		56.641	5.41			0.265	0.499	0.001	nuc				PTHR10943:SF2	4.7e-106	AgB01_g620_t01-IPRSCAN	IPR035266; IPR011989	26SProteasomenon-ATPaseregulatorysubunit1; Armadillo-likehelical	Y	-171.21	-	No					-0.938905	0.00785733
619	AgB01_g621_t06	beta-_-galactosyl-o-glycosyl-glycoprotein_beta-_-n-acetylglucosaminyltransferase_4	Unknown product	Unknown			Y	163	0	1		2	0	ExpAA=22.72 First60=22.72 PredHel=1 Topology=i13-35o	163	1	13.5	78.5	8		128	BL/SIG		18.657	6.35			0.86	4.902	0.01	mit						AgB01_g621_t06-IPRSCAN			N	Too short sequence	-	No					-0.935421	0.00800766
620	AgB01_g622_t03	cell_death_protein_3	cell death protein 3	Signal Transduction / Apoptosis	NR	0	M	439	0	0		11	0	ExpAA=0.07 First60=0.07 PredHel=0 Topology=o	439	0						CYT		50.623	6.81			0.719	2.329	0.005	nuc	HSSRLRR|SF 0.750 *ProP*	PF00656	Caspase domain	PTHR10454:SF204	1e-76	AgB01_g622_t03-IPRSCAN	IPR015917; IPR033139; IPR011029; IPR029030; IPR002138; IPR001309; IPR016129	PeptidaseC14A,caspasecatalyticdomain; PeptidasefamilyC14A,cysteineactivesite; Death-likedomainsuperfamily; Caspase-likedomainsuperfamily; PeptidaseC14,caspasenon-catalyticsubunitp10; PeptidaseC14,p20domain; PeptidasefamilyC14A,Hisactivesite	N	-165.06	-	No					-0.985632	0.00609211
621	AgB01_g623_t12	hypothetical_protein	Unknown product	Unknown			M	757	0	1		8	0	ExpAA=0.01 First60=0.01 PredHel=0 Topology=o	757	0						CYT		84.661	5.13			0.346	0.639	0.001	nuc	ARRRLRR|SL 0.827 *ProP*					AgB01_g623_t12-IPRSCAN			N	-182.22	-	No					-0.903102	0.00954549
622	AgB01_g624_t01	hypothetical_protein	Unknown product - 3 predicted membrane helices	Unknown / membrane			M	107	0	0		2	0	ExpAA=64.46 First60=26.17 PredHel=3 Topology=o26-48i57-79o83-105i	107	3	61.7	28	10.3			CYT		12.091	6.02			0.151	0.306	0.001	end						AgB01_g624_t01-IPRSCAN			N	Too short sequence	-	No					-0.997156	0.0057212
623	AgB01_g625_t05	methyltransferase-like_protein_13	Unknown product	Unknown			M	55	0	0		1	0	ExpAA=3.45 First60=3.45 PredHel=0 Topology=i	55	0						CYT		5.982	10.26			0.849	4.367	0.009	mit						AgB01_g625_t05-IPRSCAN			N	Too short sequence	-	No					-1.01138	0.00529409
624	AgB01_g626_t02	methyltransferase-like_protein_13	hypothetical secreted protein precursor	Secreted / Unknown			I	151	0	0		0	0	ExpAA=22.47 First60=21.76 PredHel=0 Topology=o	151	0						SIG	15-16	16.656	9.45	14.967	9.45	0.89	1.327	0.003	exc						AgB01_g626_t02-IPRSCAN			N	Too short sequence	-	No					-0.977211	0.00637818
625	AgB01_g627_t01	methyltransferase-like_protein_13	Unknown product	Unknown			M	89	0	0		2	0	ExpAA=0.00 First60=0.00 PredHel=0 Topology=o	89	0						CYT		10.152	5.21			0.548	1.224	0.002	cyt				PTHR12176	1.6e-16	AgB01_g627_t01-IPRSCAN	IPR029063; IPR030374	S-adenosyl-L-methionine-dependentmethyltransferase; Polyaminebiosynthesisdomain	N	Too short sequence	-	No					-1.01987	0.00505462
626	AgB01_g628_t01	hypothetical_protein	Unknown product - signalP detected - 4 predicted membrane helices	Unknown / membrane			M	298	0	0		5	0	ExpAA=91.40 First60=25.75 PredHel=4 Topology=i21-43o58-80i92-114o152-174i	298	4	29.5	17.8	52.7			SIG	37-38	33.111	7.64	29.197	6.59	0.761	3.527	0.007	end						AgB01_g628_t01-IPRSCAN			N	-77.18	-	No					-0.916909	0.00885564
627	AgB01_g629_t03	hypothetical_protein	Unknown product	Unknown			M	121	0	1		2	0	ExpAA=0.00 First60=0.00 PredHel=0 Topology=o	121	0						CYT		13.372	7.81			0.907	6.025	0.012	nuc	VRARVTR|YS 0.585 *ProP* ; VGWRNVR|DC 0.504 *ProP*	PF09405	CASC3/Barentsz eIF4AIII binding			AgB01_g629_t03-IPRSCAN	IPR018545	Btzdomain	N	Too short sequence	-	No					-0.840317	0.0134158
628	AgB01_g630_t01	hypothetical_protein	Unknown product	Unknown			M	163	0	0		0	0	ExpAA=0.00 First60=0.00 PredHel=0 Topology=o	163	0						CYT		18.585	10.06			0.789	3.449	0.007	nuc	AHSRHHR|KV 0.619 *ProP*					AgB01_g630_t01-IPRSCAN			N	Too short sequence	-	No					-0.973428	0.00651101
629	AgB01_g631_t01	Diamine_acetyltransferase_2	Unknown product	Unknown			M	99	0	0		3	0	ExpAA=5.61 First60=5.45 PredHel=0 Topology=o	99	0						CYT		11.473	9.76			0.832	4.005	0.008	mit						AgB01_g631_t01-IPRSCAN			N	Too short sequence	-	No					-0.987514	0.00602993
630	AgB01_g632_t01	Diamine_acetyltransferase_2	Diamine acetyltransferase	Amino Acid Metabolism	KOG	5e-36	M	166	0	0		1	0	ExpAA=6.56 First60=2.25 PredHel=0 Topology=o	166	0						CYT		19.544	5.74			0.547	1.294	0.003	cyt		PF00583	Acetyltransferase (GNAT) family	PTHR10545	7.5e-41	AgB01_g632_t01-IPRSCAN	IPR016181; IPR000182; IPR000182	Acyl-CoAN-acyltransferase; GNATdomain	N	Too short sequence	-	No					-0.975719	0.00643025
631	AgB01_g633_t02	Transmembrane_and_TPR_repeat-containing_protein	O-linked N-acetylglucosamine transferase OGT - probable fragment - 6 predicted membrane helices	Signal Transduction / membrane	KOG	1e-25	M	740	0	0		22	0	ExpAA=163.47 First60=6.98 PredHel=5 Topology=i273-295o315-334i359-378o388-410i415-432o	740	5	13.4	45.7	40.9			CYT		84.241	9.05			0.78	3.304	0.007	end		PF13181; PF13181; PF13181; PF08409; PF13374	Tetratricopeptide repeat; Tetratricopeptide repeat; Tetratricopeptide repeat; Domain of unknown function (DUF1736); Tetratricopeptide repeat	PTHR44227	2.2e-234	AgB01_g633_t02-IPRSCAN	IPR011990; IPR019734; IPR013026; IPR013618; IPR019734	Tetratricopeptide-likehelicaldomainsuperfamily; Tetratricopeptiderepeat; Tetratricopeptiderepeat-containingdomain; DomainofunknownfunctionDUF1736	N	-74.14	-	No					-0.906694	0.00936104
632	AgB01_g634_t01	uro-adherence_factor_a	Mucin 68D - extracellular matrix structural constituent - extracellular matrix - extracellular region - chitin binding - chitin metabolic process - probable fragment	Secreted	GO	3e-27	N	700	0	0		11	0	ExpAA=0.00 First60=0.00 PredHel=0 Topology=o	700	0						CYT		74.406	4.05			0.624	1.47	0.003	nuc	IQNGSAR|SV 0.504 *ProP* ; SEVRKKR|SA 0.893 *ProP*					AgB01_g634_t01-IPRSCAN			N	-192.98	-	No					-0.935277	0.00801394
633	AgB01_g635_t02	uro-adherence_factor_a	Unknown product	Unknown			M	607	0	1		3	0	ExpAA=0.96 First60=0.00 PredHel=0 Topology=o	607	0						CYT		68.487	5.59			0.334	0.616	0.001	nuc	ASKRQRR|SS 0.613 *ProP*			PTHR23034	4.3e-20	AgB01_g635_t02-IPRSCAN	IPR027962; IPR027962	ProteinofunknownfunctionDUF4590	N	-154.64	-	No					-0.957883	0.00708626
634	AgB01_g636_t01	hypothetical_protein	Unknown product	Unknown			S	97	0	0	C(3.47)W(3.7)	8	0	ExpAA=0.41 First60=0.17 PredHel=0 Topology=o	97	0						CYT		11.386	9.6			0.769	2.797	0.006	nuc						AgB01_g636_t01-IPRSCAN			N	Too short sequence	-	No					-1.01905	0.00507734
635	AgB01_g637_t01	Warthog_protein_1	protein - vesicle-mediated transport - trans-Golgi network - ARF guanyl-nucleotide exchange factor	Protein Export	GO	9e-08	F	243	0	1		2	0	ExpAA=0.00 First60=0.00 PredHel=0 Topology=o	243	0						CYT		27.964	6.63			0.769	3.575	0.007	cyt		PF03114	BAR domain	PTHR44071:SF1	8.3e-16	AgB01_g637_t01-IPRSCAN	IPR004148; IPR027267; IPR027267	BARdomain; AH/BARdomainsuperfamily	N	-244.74	-	No					-1.00097	0.00560333
636	AgB01_g638_t01	Warthog_protein_1	Unknown product - 2 predicted membrane helices	Unknown / membrane			M	70	0	0	W(5.12)	1	0	ExpAA=17.35 First60=14.80 PredHel=1 Topology=i43-62o	70	1	27.1	11.4	61.4		8	ANC		8.229	5.5	4.617	5.27	0.444	1.452	0.003	mit						AgB01_g638_t01-IPRSCAN			N	Too short sequence	-	No					-1.02872	0.00481618
637	AgB01_g639_t01	warthog_protein_1	Unknown product	Unknown			L	263	0	0		8	0	ExpAA=0.00 First60=0.00 PredHel=0 Topology=o	263	0						CYT		29.188	5.14			0.893	5.581	0.011	nuc	QCIRGRR|SN 0.660 *ProP*					AgB01_g639_t01-IPRSCAN			N	-175.72	-	No					-0.904814	0.00945715
638	AgB01_g640_t01	hypothetical_protein	Unknown product	Unknown			M	166	0	0		3	0	ExpAA=0.94 First60=0.92 PredHel=0 Topology=o	166	0						CYT		19.729	9.74			0.897	5.634	0.011	nuc						AgB01_g640_t01-IPRSCAN			N	Too short sequence	-	No					-0.977017	0.00638494
639	AgB01_g641_t01	hypothetical_protein	Unknown product	Unknown			A	165	0	0		2	0	ExpAA=0.02 First60=0.01 PredHel=0 Topology=o	165	0						CYT		18.351	4.97			0.643	1.649	0.003	cyt						AgB01_g641_t01-IPRSCAN	IPR036465	vonWillebrandfactorA-likedomainsuperfamily	N	Too short sequence	-	No					-1.00012	0.00562935
640	AgB01_g642_t04	serine_threonine-protein_phosphatase_pp1_isozyme_1	serine threonine-protein phosphatase pp1 isozyme 1	Signal Transduction	NR	0	M	408	0	2		8	0	ExpAA=0.11 First60=0.00 PredHel=0 Topology=o	408	0						CYT		45.936	7.18			0.476	0.936	0.002	cyt		PF00149	Calcineurin-like phosphoesterase	PTHR11668	1.6e-92	AgB01_g642_t04-IPRSCAN	IPR004843; IPR029052; IPR006186; IPR006186	Calcineurin-likephosphoesterasedomain,ApaHtype; Metallo-dependentphosphatase-like; Serine/threonine-specificproteinphosphatase/bis(5-nucleosyl)-tetraphosphatase	N	-122.21	-	No					-1.00143	0.00558932
641	AgB01_g643_t02	glycerol_kinase_5	FGGY family of carbohydrate kinases N-terminal domain containing protein (Brugia malayi)	Signal Transduction	NR	0	S	452	0	1		18	0	ExpAA=32.54 First60=2.59 PredHel=0 Topology=o	452	0						CYT		50.607	8.75			0.475	0.946	0.002	cyt		PF02782; PF00370	FGGY family of carbohydrate kinases, C-terminal domain; FGGY family of carbohydrate kinases, N-terminal domain	PTHR10196	1.8e-158	AgB01_g643_t02-IPRSCAN	IPR018485; IPR018484; IPR000577	Carbohydratekinase,FGGY,C-terminal; Carbohydratekinase,FGGY,N-terminal; Carbohydratekinase,FGGY	N	-91.06	-	No					-0.996817	0.00573176
642	AgB01_g644_t03	DnaJ_subfamily_C_member_3	dsRNA-activated protein kinase inhibitor P58 contains TPR and DnaJ - signalP detected	Immunologically Relevant / secreted / dsRNA-activated	KOG	0	M	452	0	2		12	0	ExpAA=0.67 First60=0.67 PredHel=0 Topology=o	452	0						SIG	38-39	52.241	8.68	47.855	8.69	0.314	0.622	0.001	mit		PF13181; PF13181; PF13432; PF00226	Tetratricopeptide repeat; Tetratricopeptide repeat; Tetratricopeptide repeat; DnaJ domain	PTHR44140:SF3	3.8e-154	AgB01_g644_t03-IPRSCAN	IPR013026; IPR019734; IPR001623; IPR036869; IPR011990; IPR001623	Tetratricopeptiderepeat-containingdomain; Tetratricopeptiderepeat; DnaJdomain; ChaperoneJ-domainsuperfamily; Tetratricopeptide-likehelicaldomainsuperfamily	N	-214.49	-	No					-0.973508	0.00650817
643	AgB01_g645_t01	60S_ribosomal_protein_L35,_partial	60s ribosomal protein l35	Protein Synthesis	NR	5e-59	M	123	0	0	K(3.64)	0	0	ExpAA=0.00 First60=0.00 PredHel=0 Topology=i	123	0						CYT		14.241	11.31			0.808	4.107	0.008	nuc		PF00831	Ribosomal L29 protein	PTHR13872:SF3	1.1e-47	AgB01_g645_t01-IPRSCAN	IPR036049; IPR001854; IPR018254; IPR001854	RibosomalproteinL29/L35superfamily; RibosomalproteinL29/L35; RibosomalproteinL29,conservedsite	N	Too short sequence	-	No					-0.958095	0.0070781
644	AgB01_g646_t05	60S_ribosomal_protein_L35	Unknown product - 5 predicted membrane helices	Unknown / membrane			M	205	0	0		4	0	ExpAA=92.12 First60=23.22 PredHel=4 Topology=o27-49i62-84o99-121i154-176o	205	4	42.9	34.6	22.4			BL/ANC		23.361	8.33			0.968	7.335	0.015	end						AgB01_g646_t05-IPRSCAN			N	-135.51	-	No					-0.888389	0.0103393
645	AgB01_g647_t02	hypothetical_protein	Unknown product - 3 predicted membrane helices	Unknown / membrane			Q	123	0	0		3	0	ExpAA=63.09 First60=40.30 PredHel=3 Topology=o10-32i34-52o67-89i	123	3	50.4	20.3	29.3			BL	20-21	13.944	9.51	11.767	9.6	0.295	0.599	0.001	end						AgB01_g647_t02-IPRSCAN			N	Too short sequence	-	No					-0.943983	0.00764322
646	AgB01_g648_t01	Heparan-sulfate_6-O-sulfotransferase_2	heparan-sulfate 6-o-sulfotransferase 2	Extracellular Matrix	NR	0	M	472	0	1		11	0	ExpAA=21.81 First60=21.81 PredHel=1 Topology=i13-35o	472	1	4.7	92.6	2.8		437	BL/SIG		54.884	8.48			0.497	0.732	0.001	mit	GVHRKRR|YF 0.684 *ProP*	PF03567	Sulfotransferase family	PTHR12812:SF0	1e-133	AgB01_g648_t01-IPRSCAN	IPR010635; IPR005331	Heparansulphate6-sulfotransferase/Protein-tyrosinesulfotransferase; Sulfotransferase	N	-153.38	-	No					-1.0275	0.00484853
647	AgB01_g649_t01	helix-loop-helix_34	Hypoxia-inducible factor 1/Neuronal PAS domain protein NPAS1 - probable fragment	Signal Transduction	KOG	2e-43	C	323	0	0		8	0	ExpAA=7.00 First60=0.00 PredHel=0 Topology=o	323	0						CYT		36.698	7.3			0.648	1.71	0.003	mit				PTHR23043	6.4e-62	AgB01_g649_t01-IPRSCAN	IPR000014; IPR035965; IPR011598; IPR035965	PASdomain; PASdomainsuperfamily; Myc-type,basichelix-loop-helix(bHLH)domain	N	-146.47	-	No					-0.848528	0.0128327
648	AgB01_g650_t03	hypothetical_protein	Unknown product	Unknown			M	217	0	0		2	0	ExpAA=11.96 First60=11.37 PredHel=0 Topology=o	217	0						BL	37-38	23.271	4.86	18.785	4.9	0.399	1.149	0.002	nuc						AgB01_g650_t03-IPRSCAN			N	-153.12	-	No					-1.05108	0.00426287
649	AgB01_g651_t01	Cuticle_collagen_13	Cuticle collagen 13 - probable fragment	Extracellular Matrix	NR	9e-93	M	202	0.495049	0	X(72.9)	9	0.49505	ExpAA=22.95 First60=22.94 PredHel=1 Topology=i21-43o	202	1	10.9	78.7	10.4		159	CYT		21.095	5.08			0.643	3.405	0.007	nuc	GGARNPR|QA 0.515 *ProP* ; RCTRQRR|YC 0.531 *ProP*	PF01484	Nematode cuticle collagen N-terminal domain	PTHR43926	8e-71	AgB01_g651_t01-IPRSCAN	IPR002486; IPR002486	Nematodecuticlecollagen,N-terminal	N	-278.54	-	No					-0.5278	0.0701676
650	AgB01_g652_t01	aristaless-related_homeobox_protein	Unknown product	Unknown			M	207	0	0		0	0	ExpAA=0.44 First60=0.22 PredHel=0 Topology=o	207	0						CYT		21.209	9.22			0.841	0.865	0.002	nuc						AgB01_g652_t01-IPRSCAN			N	-175.14	-	No					-0.935872	0.00798804
651	AgB01_g653_t01	Aristaless-related_homeobox_protein	Unknown product	Unknown			M	79	0	1		0	0	ExpAA=0.00 First60=0.00 PredHel=0 Topology=o	79	0						CYT		8.576	5.99			0.574	1.42	0.003	nuc						AgB01_g653_t01-IPRSCAN			N	Too short sequence	-	No					-0.998615	0.00567584
652	AgB01_g654_t01	hypothetical_protein	Unknown product	Unknown			F	55	0	0		0	0	ExpAA=0.01 First60=0.01 PredHel=0 Topology=o	55	0						CYT		6.226	10.57			0.913	6.195	0.012	mit						AgB01_g654_t01-IPRSCAN			N	Too short sequence	-	No					-0.888666	0.0103237
653	AgB01_g655_t01	hypothetical_protein	Unknown product	Unknown			M	105	0	1		1	0	ExpAA=0.38 First60=0.22 PredHel=0 Topology=o	105	0						CYT		11.447	7.92			0.957	7.305	0.015	nuc						AgB01_g655_t01-IPRSCAN			N	Too short sequence	-	No					-0.978094	0.00634758
654	AgB01_g656_t03	hypothetical_protein	Unknown product	Unknown			M	86	1.16279	0	X(171.23)	4	1.16279	ExpAA=8.80 First60=1.05 PredHel=0 Topology=o	86	0						CYT		9.807	9.84			0.822	3.824	0.008	mit						AgB01_g656_t03-IPRSCAN			N	Too short sequence	-	No					-0.848896	0.0128073
655	AgB01_g657_t02	AP-3_complex_subunit_beta-2	Unknown product	Unknown			M	107	0	1		4	0	ExpAA=3.87 First60=1.71 PredHel=0 Topology=o	107	0						CYT		11.661	9.94			0.876	5.061	0.01	mit		PF01602	Adaptin N terminal region	PTHR11134:SF1	1.9e-30	AgB01_g657_t02-IPRSCAN	IPR002553; IPR011989; IPR026740; IPR026739	Clathrin/coatomeradaptor,adaptin-like,N-terminal; Armadillo-likehelical; AP-3complexsubunitbeta; APcomplexsubunitbeta	N	Too short sequence	-	No					-0.984031	0.0061455
656	AgB01_g658_t03	Trophoblast_glycoprotein	integral component of membrane - membrane - axonogenesis - extracellular space - proteinaceous extracellular matrix - probable fragment	Extracellular Matrix	GO	3e-70	M	247	0	1		6	0	ExpAA=0.15 First60=0.12 PredHel=0 Topology=o	247	0						BL	21-22	28.434	6.12	26.203	5.82	0.811	3.665	0.007	mit		PF13855	Leucine rich repeat	PTHR24373:SF258	1e-66	AgB01_g658_t03-IPRSCAN	IPR001611; IPR032675; IPR001611	Leucine-richrepeat; Leucine-richrepeatdomainsuperfamily	N	-147.33	-	No					-0.92414	0.00851429
657	AgB01_g659_t01	hypothetical_protein	Unknown product - Membrane anchor detected	Unknown / membrAnchor			M	123	0	0		3	0	ExpAA=23.39 First60=1.02 PredHel=1 Topology=o80-102i	123	1	17.9	65	17.1		21	ANC		14.856	10.24	12.778	10.1	0.078	0.18	0	mit	FDSRKKR|SF 0.820 *ProP*					AgB01_g659_t01-IPRSCAN			N	Too short sequence	-	No					-0.799842	0.016694
658	AgB01_g660_t02	Peptidase_inhibitor_16	peptidase inhibitor 16 - signalP detected	Secreted / Protease Inhibitor	NR	0	F	408	0	0		24	0	ExpAA=22.66 First60=22.62 PredHel=1 Topology=i12-34o	408	1	5.4	91.7	2.9		374	SIG	25-26	47.041	9.02	44.296	9.07	0.762	2.91	0.006	nuc		PF01549; PF01549; PF00188	ShK domain-like; ShK domain-like; Cysteine-rich secretory protein family	PTHR10334	1.6e-40	AgB01_g660_t02-IPRSCAN	IPR002413; IPR003582; IPR001283; IPR035940; IPR018244; IPR014044; IPR014044	Vesallergen; ShKTdomain; Cysteine-richsecretoryprotein,allergenV5/Tpx-1-related; CAPsuperfamily; AllergenV5/Tpx-1-related,conservedsite; CAPdomain	N	-102.42	-	No					-0.812013	0.0156331
659	AgB01_g661_t01	u3_small_nucleolar_rna-associated_protein_18-like_protein	u3 small nucleolar rna-associated protein 18-like protein - probable fragment	Transcription Machinery	NR	0	M	371	0	0		5	0	ExpAA=0.01 First60=0.00 PredHel=0 Topology=o	371	0						CYT		41.358	6.29			0.471	0.921	0.002	nuc	KKGRKRR|RR 0.643 *ProP* ; GRKRRRR|DE 0.698 *ProP*			PTHR18359	3.3e-43	AgB01_g661_t01-IPRSCAN	IPR015943; IPR036322	WD40/YVTNrepeat-like-containingdomainsuperfamily; WD40-repeat-containingdomainsuperfamily	N	-147.69	-	No					-1.00989	0.00533748
660	AgB01_g662_t01	Phosphatidylinositol_transfer_protein_alpha_isoform	Phosphatidylinositol transfer protein	Lipid Metabolism	KOG	5e-85	M	282	0	2		6	0	ExpAA=0.00 First60=0.00 PredHel=0 Topology=o	282	0						CYT		32.849	7.01			0.561	1.282	0.003	cyt		PF02121	Phosphatidylinositol transfer protein	PTHR10658:SF35	2.2e-90	AgB01_g662_t01-IPRSCAN	IPR023393; IPR001666; IPR001666	START-likedomainsuperfamily; Phosphatidylinositoltransferprotein	N	-207.7	-	No					-0.951515	0.00733621
661	AgB01_g663_t01	microtubule-associated_protein_futsch	Unknown product	Unknown			M	284	0	0		7	0	ExpAA=0.00 First60=0.00 PredHel=0 Topology=o	284	0						CYT		32.504	9.24			0.694	2.158	0.004	nuc						AgB01_g663_t01-IPRSCAN			N	-251.16	-	No					-0.985897	0.00608332
662	AgB01_g664_t01	hypothetical_protein	Unknown product	Unknown			I	631	0	1		6	0	ExpAA=0.00 First60=0.00 PredHel=0 Topology=o	631	0						CYT		70.439	10.11			0.553	1.228	0.002	nuc	GNYRIAR|SL 0.652 *ProP*					AgB01_g664_t01-IPRSCAN			N	-180.44	-	No					-0.963021	0.00689075
663	AgB01_g665_t01	hypothetical_protein	Unknown product	Unknown			M	220	0	0		1	0	ExpAA=0.03 First60=0.00 PredHel=0 Topology=o	220	0						CYT		23.755	11.3			0.77	2.966	0.006	nuc						AgB01_g665_t01-IPRSCAN			N	-169.34	-	No					-0.873899	0.0111847
664	AgB01_g666_t01	hypothetical_protein	Unknown product	Unknown			K	112	0	0		0	0	ExpAA=2.75 First60=0.00 PredHel=0 Topology=i	112	0						CYT		13.748	8.14			0.399	0.782	0.002	cyt						AgB01_g666_t01-IPRSCAN	IPR012292	Globin/Protoglobin	N	Too short sequence	-	No					-1.0241	0.00493918
665	AgB01_g667_t01	phospholipase_b-like_2	Uncharacterized conserved protein Lama - signalP detected	Signal Transduction / Secreted / Uncharacterized	KOG	0	M	588	0	0		11	0	ExpAA=0.07 First60=0.06 PredHel=0 Topology=o	588	0						SIG	27-28	67.855	5.92	64.707	5.71	0.644	1.656	0.003	mit		PF04916	Phospholipase B	PTHR12370:SF7	8.2e-264	AgB01_g667_t01-IPRSCAN	IPR007000; IPR007000	PhospholipaseB-like	N	-128.97	-	No					-0.941926	0.00772925
666	AgB01_g668_t01	Phospholipase_B-like_protein_2	Unknown product	Unknown			M	58	0	0		2	0	ExpAA=1.57 First60=1.57 PredHel=0 Topology=o	58	0						BL	17-18	6.912	10.31	4.892	10.04	0.753	2.858	0.006	mit						AgB01_g668_t01-IPRSCAN			N	Too short sequence	-	No					-0.974073	0.00648817
667	AgB01_g669_t01	hypothetical_protein	Unknown product - 2 predicted membrane helices	Unknown / membrane			M	181	0	0		2	0	ExpAA=45.54 First60=23.55 PredHel=2 Topology=i7-29o66-88i	181	2	24.3	20.4	55.2		93	BL	25-26	20.699	6.08	17.986	5.95	0.662	2.018	0.004	end						AgB01_g669_t01-IPRSCAN			N	Too short sequence	-	No					-1.00252	0.00555613
668	AgB01_g670_t01	hypothetical_protein	Unknown product - signalP detected	Unknown			M	113	0	0		2	0	ExpAA=12.38 First60=12.38 PredHel=1 Topology=o15-37i	113	1	19.5	13.3	67.3		76	SIG	15-16	12.402	10.53	10.68	10.54	0.653	1.774	0.004	nuc						AgB01_g670_t01-IPRSCAN			N	Too short sequence	-	No					-0.907159	0.00933745
669	AgB01_g671_t07	hypothetical_protein	hypothetical secreted protein precursor	Secreted / Unknown			K	104	0	0	W(3.45)	0	0	ExpAA=22.70 First60=21.98 PredHel=1 Topology=i21-40o	104	1	18.3	61.5	20.2		64	SIG	35-36	11.181	10.15	7.175	9.96	0.833	4.097	0.008	mit						AgB01_g671_t07-IPRSCAN			N	Too short sequence	-	No					-0.920533	0.00868292
670	AgB01_g672_t01	ATP-binding_cassette_sub-family_D_member_4	Peroxisomal long-chain acyl-CoA transporter ABC superfamily - probable fragment	Transporters	KOG	5e-45	M	240	0	0		3	0	ExpAA=0.00 First60=0.00 PredHel=0 Topology=o	240	0						CYT		27.39	5.36			0.659	1.748	0.003	cyt		PF00005	ABC transporter	PTHR11384	3.3e-79	AgB01_g672_t01-IPRSCAN	IPR003439; IPR027417; IPR003439	ABCtransporter-like; P-loopcontainingnucleosidetriphosphatehydrolase	N	-176.11	-	No					-0.935016	0.00802533
671	AgB01_g673_t01	ATP-binding_cassette_sub-family_D_member_4,_partial	Long-chain acyl-CoA transporter - probable fragment - 6 predicted membrane helices - GPI anchored	Transporters / membrane / GPI	KOG	8e-78	M	315	0	0		5	0	ExpAA=114.13 First60=26.35 PredHel=5 Topology=i35-57o80-102i154-173o183-205i263-285o	315	5	34	20	46			BL	50-51	35.691	8.48	30.088	7.77	0.556	0.803	0.002	mit		PF06472	ABC transporter transmembrane region 2	PTHR11384	9.4e-71	AgB01_g673_t01-IPRSCAN	IPR036640; IPR011527; IPR011527	ABCtransportertype1,transmembranedomainsuperfamily; ABCtransportertype1,transmembranedomain	Y	-72.52	-	No					-0.979048	0.00631466
672	AgB01_g674_t01	atp-binding_cassette_sub-family_d_member_4	Peroxisomal long-chain acyl-CoA transporter ABC superfamily - 6 predicted membrane helices	Transporters / membrane	KOG	6e-60	M	644	0	0		7	0	ExpAA=113.28 First60=22.92 PredHel=5 Topology=i35-57o77-99i152-174o184-203i274-296o	644	5	16.6	58.7	24.7			CYT		74.061	5.31			0.841	4.206	0.008	end		PF06472; PF00005	ABC transporter transmembrane region 2; ABC transporter	PTHR11384	1.8e-204	AgB01_g674_t01-IPRSCAN	IPR003439; IPR011527; IPR027417; IPR003593; IPR036640	ABCtransporter-like; ABCtransportertype1,transmembranedomain; P-loopcontainingnucleosidetriphosphatehydrolase; AAA+ATPasedomain; ABCtransportertype1,transmembranedomainsuperfamily	N	-122.67	-	No					-0.99854	0.00567817
673	AgB01_g675_t03	hypothetical_protein	Unknown product	Unknown			M	322	0	0		10	0	ExpAA=0.00 First60=0.00 PredHel=0 Topology=o	322	0						CYT		36.074	6.62			0.55	3.635	0.007	nuc	FESDLKR|SV 0.531 *ProP* ; TNTQLKR|SV 0.616 *ProP*					AgB01_g675_t03-IPRSCAN			N	-95.04	-	No					-0.955947	0.00716133
674	AgB01_g676_t01	Pre-rRNA-processing_protein_pro-1	Pre-rRNA-processing protein pro-1	Transcription Machinery	NR	0	M	481	0	2		11	0	ExpAA=0.02 First60=0.00 PredHel=0 Topology=o	481	0						BL	19-20	53.4	4.97	51.418	5.08	0.612	1.512	0.003	cyt	HRRRHIK|SV 0.620 *ProP*	PF00400; PF00400	WD domain, G-beta repeat; WD domain, G-beta repeat	PTHR18763:SF0	1.5e-55	AgB01_g676_t01-IPRSCAN	IPR001680; IPR036322; IPR015943; IPR017986; IPR001680	WD40repeat; WD40-repeat-containingdomainsuperfamily; WD40/YVTNrepeat-like-containingdomainsuperfamily; WD40-repeat-containingdomain	N	-129.35	-	No					-0.980375	0.00626917
675	AgB01_g677_t02	Methylmalonic_aciduria_and_homocystinuria_type_D,_partial	Methylmalonic aciduria and homocystinuria type D -like protein mitochondrial partial	Energy Metabolism	NR	5e-99	M	255	0	1		5	0	ExpAA=0.40 First60=0.00 PredHel=0 Topology=o	255	0						CYT		28.038	5.74			0.582	1.344	0.003	mit		PF10229	Methylmalonic aciduria and homocystinuria type D protein	PTHR13192	1e-53	AgB01_g677_t02-IPRSCAN	IPR019362; IPR019362	MethylmalonicaciduriaandhomocystinuriatypeDprotein	N	-191.2	-	No					-0.774011	0.0191856
676	AgB01_g678_t01	hypothetical_protein	Unknown product	Unknown			H	116	0	0	W(3.86)	0	0	ExpAA=1.25 First60=1.06 PredHel=0 Topology=o	116	0						CYT		12.488	4.98			0.853	4.405	0.009	mit						AgB01_g678_t01-IPRSCAN			N	Too short sequence	-	No					-0.602849	0.0476228
677	AgB01_g679_t01	hypothetical_protein	Unknown product	Unknown			M	425	0	0		6	0	ExpAA=0.01 First60=0.01 PredHel=0 Topology=o	425	0						CYT		47.278	9.86			0.583	1.43	0.003	nuc	DNLRKKR|PT 0.615 *ProP* ; RGNRWKR|QT 0.654 *ProP* ; RWKRQTR|SK 0.500 *ProP* ; RQTRSKK|LV 0.585 *ProP*					AgB01_g679_t01-IPRSCAN			N	-168.35	-	No					-0.940136	0.00780489
678	AgB01_g680_t01	hypothetical_protein	Unknown product	Unknown			H	116	0	0	W(3.86)	0	0	ExpAA=2.24 First60=2.00 PredHel=0 Topology=o	116	0						CYT		12.502	5.18			0.853	4.413	0.009	mit						AgB01_g680_t01-IPRSCAN			N	Too short sequence	-	No					-0.685117	0.0308653
679	AgB01_g681_t01	hypothetical_protein	Unknown product	Unknown			F	114	0	1	W(3.14)	0	0	ExpAA=23.23 First60=6.25 PredHel=1 Topology=o56-78i	114	1	19.3	49.1	31.6		36	CYT		13.421	5.01			0.329	0.726	0.001	mit						AgB01_g681_t01-IPRSCAN			N	Too short sequence	-	No					-1.00886	0.00536742
680	AgB01_g682_t01	tRNA_pseudouridine_synthase_2	trna pseudouridine synthase 2	Protein Synthesis	NR	0	S	272	1.47059	0	X(216.56)	8	1.47059	ExpAA=0.02 First60=0.01 PredHel=0 Topology=o	272	0						CYT		30.447	5.78			0.454	0.904	0.002	nuc		PF01509	TruB family pseudouridylate synthase (N terminal domain)	PTHR13195	1.2e-64	AgB01_g682_t01-IPRSCAN	IPR002501; IPR020103	PseudouridinesynthaseII,N-terminal; Pseudouridinesynthase,catalyticdomainsuperfamily	N	-190.14	-	No					-0.895526	0.00994637
681	AgB01_g683_t02	tRNA_pseudouridine_synthase_2	Unknown product	Unknown			N	115	3.47826	0	X(512.21)	5	3.47826	ExpAA=0.85 First60=0.84 PredHel=0 Topology=o	115	0						CYT		12.397	7.05			0.885	5.437	0.011	mit						AgB01_g683_t02-IPRSCAN			N	Too short sequence	-	No					-0.93988	0.00781574
682	AgB01_g686_t01	hypothetical_protein	serine and arginine rich splicing factor 4 - sequence-specific mRNA binding - negative regulation of mRNA splicing - signalP detected	Transcription Machinery	GO	1e-07	M	346	0	0		3	0	ExpAA=17.44 First60=17.43 PredHel=1 Topology=i7-29o	346	1	6.4	91.6	2		317	SIG	23-24	38.625	10.24	35.98	10.24	0.721	2.205	0.004	nuc						AgB01_g686_t01-IPRSCAN			N	-117.39	-	No					-0.962142	0.0069238
683	AgB01_g687_t01	hypothetical_protein	integral component of membrane - membrane - G-protein coupled receptor signaling pathway - G-protein coupled receptor - 5 predicted membrane helices	Protein Export / membrane	GO	2e-08	M	291	0	1		7	0	ExpAA=110.04 First60=13.20 PredHel=5 Topology=o48-70i83-103o123-145i166-188o198-220i	291	5	37.1	26.8	36.1			CYT		33.444	9.24			0.084	0.19	0	end				PTHR23360:SF29	1.3e-19	AgB01_g687_t01-IPRSCAN			N	-71.61	-	No					-0.973419	0.00651133
684	AgB01_g688_t03	hypothetical_protein	Unknown product	Unknown			M	264	0	1		3	0	ExpAA=0.12 First60=0.00 PredHel=0 Topology=o	264	0						CYT		30.24	10.12			0.761	2.632	0.005	nuc						AgB01_g688_t03-IPRSCAN			N	-227.2	-	No					-0.995352	0.00577772
685	AgB01_g689_t01	hypothetical_protein	Unknown product	Unknown			M	87	0	0		2	0	ExpAA=1.31 First60=1.31 PredHel=0 Topology=o	87	0						CYT		10.375	10.03			0.831	3.806	0.008	mit						AgB01_g689_t01-IPRSCAN			N	Too short sequence	-	No					-1.07271	0.003788
686	AgB01_g690_t01	transcription_factor_sox-2	transcription factor sox-2	Transcription Factor	NR	0	M	355	0	0		1	0	ExpAA=0.02 First60=0.00 PredHel=0 Topology=o	355	0						CYT		38.498	9.63			0.235	0.45	0.001	nuc		PF00505	HMG (high mobility group) box	PTHR10270	2.7e-42	AgB01_g690_t01-IPRSCAN	IPR009071; IPR036910; IPR036910	Highmobilitygroupboxdomain; Highmobilitygroupboxdomainsuperfamily	N	-99.23	-	No					-0.835272	0.013787
687	AgB01_g691_t03	Cleavage_and_polyadenylation_specificity_factor_subunit_2	cleavage and polyadenylation specificity factor (CPSF subunit)	Transcription Machinery	KOG	2e-39	M	841	0	1		12	0	ExpAA=0.95 First60=0.22 PredHel=0 Topology=o	841	0						CYT		94.863	5.67			0.276	0.517	0.001	cyt		PF07521; PF16661; PF13299; PF10996	Zn-dependent metallo-hydrolase RNA specificity domain; Metallo-beta-lactamase superfamily domain; Cleavage and polyadenylation factor 2 C-terminal; Beta-Casp domain	PTHR11203	6.9e-241	AgB01_g691_t03-IPRSCAN	IPR011108; IPR001279; IPR036866; IPR035639; IPR027075; IPR025069; IPR022712; IPR022712	Zn-dependentmetallo-hydrolase,RNAspecificitydomain; Metallo-beta-lactamase; RibonucleaseZ/Hydroxyacylglutathionehydrolase-like; CPSF2,metallo-hydrolasedomain; Cleavageandpolyadenylationspecificityfactorsubunit2; Cleavageandpolyadenylationspecificityfactor2,C-terminal; Beta-Caspdomain	N	-174.12	-	No					-0.965588	0.00679507
688	AgB01_g692_t01	hypothetical_protein	Protein CBG22835 - steroid hydroxylase - probable fragment	Lipid Metabolism	GO	4e-19	M	315	0.31746	0	X(46.75)	9	0.31746	ExpAA=0.45 First60=0.22 PredHel=0 Topology=o	315	0						BL	20-21	35.299	9.61	33.298	9.68	0.663	1.883	0.004	cyt		PF12762	ISXO2-like transposase domain	PTHR31524:SF1	9.4e-63	AgB01_g692_t01-IPRSCAN	IPR024445; IPR024445	ISXO2-liketransposasedomain	N	-171.54	-	No					-0.965572	0.00679568
689	AgB01_g693_t01	hypothetical_protein	hypothetical secreted protein precursor	Secreted / Unknown			M	105	0	0		0	0	ExpAA=16.15 First60=16.03 PredHel=0 Topology=o	105	0						SIG	27-28	11.215	9.16	8.356	9.53	0.863	4.811	0.01	exc						AgB01_g693_t01-IPRSCAN			N	Too short sequence	-	No					-0.94431	0.00762961
690	AgB01_g694_t01	peptide_methionine_sulfoxide_reductase	Unknown product	Unknown			M	72	0	0	W(3.73)	1	0	ExpAA=1.40 First60=1.16 PredHel=0 Topology=o	72	0						CYT		8.117	4.52			0.77	3.41	0.007	cyt						AgB01_g694_t01-IPRSCAN			N	Too short sequence	-	No					-0.997663	0.0057054
691	AgB01_g695_t01	hypothetical_protein	Unknown product	Unknown			M	95	0	0		3	0	ExpAA=0.00 First60=0.00 PredHel=0 Topology=o	95	0						CYT		10.693	9.58			0.869	4.878	0.01	nuc						AgB01_g695_t01-IPRSCAN			N	Too short sequence	-	No					-0.869869	0.0114317
692	AgB01_g696_t01	hypothetical_protein	Unknown product - 4 predicted membrane helices	Unknown / membrane			N	192	0	0		4	0	ExpAA=85.19 First60=31.46 PredHel=4 Topology=i19-41o51-73i94-116o136-158i	192	4	45.8	15.6	38.5			CYT		21.791	8.64			0.176	0.385	0.001	end		PF10320	Serpentine type 7TM GPCR chemoreceptor Srsx	PTHR23360	5.6e-16	AgB01_g696_t01-IPRSCAN	IPR019424	Serpentinetype7TMGPCRchemoreceptorSrsx	N	Too short sequence	-	No					-1.02846	0.004823
693	AgB01_g697_t01	hypothetical_protein	Unknown product	Unknown			S	208	0	0		1	0	ExpAA=28.72 First60=21.91 PredHel=1 Topology=i24-46o	208	1	10.6	77.9	11.5		162	BL	36-37	22.219	9.63	18.331	9.42	0.884	5.236	0.01	mit						AgB01_g697_t01-IPRSCAN			N	-187.33	-	No					-0.925758	0.00843972
694	AgB01_g698_t03	40S_ribosomal_protein_S16	40s ribosomal protein s16	Protein Synthesis	NR	8e-75	M	145	0	1		1	0	ExpAA=0.03 First60=0.00 PredHel=0 Topology=i	145	0						CYT		16.581	10.26			0.73	1.572	0.003	mit		PF00380	Ribosomal protein S9/S16	PTHR21569	7.7e-67	AgB01_g698_t03-IPRSCAN	IPR000754; IPR014721; IPR020574; IPR020568	RibosomalproteinS9; RibosomalproteinS5domain2-typefold,subgroup; RibosomalproteinS9,conservedsite; RibosomalproteinS5domain2-typefold	N	Too short sequence	-	No					-0.943465	0.00766479
695	AgB01_g699_t04	f-box_domain_containing_protein	Unknown product	Unknown			M	457	0	0		9	0	ExpAA=0.00 First60=0.00 PredHel=0 Topology=o	457	0						CYT		52.304	5.92			0.494	0.986	0.002	nuc		PF00646	F-box domain			AgB01_g699_t04-IPRSCAN	IPR032675; IPR036047; IPR001810	Leucine-richrepeatdomainsuperfamily; F-box-likedomainsuperfamily; F-boxdomain	N	-114.4	-	No					-0.965084	0.00681377
696	AgB01_g700_t04	f-box_domain_containing_protein	Unknown product	Unknown			M	442	0	1		8	0	ExpAA=0.05 First60=0.00 PredHel=0 Topology=o	442	0						CYT		50.103	7.31			0.297	0.553	0.001	nuc		PF00646	F-box domain			AgB01_g700_t04-IPRSCAN	IPR032675; IPR001810; IPR036047; IPR001810	Leucine-richrepeatdomainsuperfamily; F-boxdomain; F-box-likedomainsuperfamily	N	-90.81	-	No					-0.979006	0.00631611
697	AgB01_g701_t02	hypothetical_protein	Epidermal growth factor receptor kinase substrate 8-like protein 3	Signal Transduction	NR	0	M	526	0	1		5	0	ExpAA=0.04 First60=0.00 PredHel=0 Topology=o	526	0						CYT		58.097	6.14			0.705	2.153	0.004	nuc		PF00018	SH3 domain	PTHR12287	6e-14	AgB01_g701_t02-IPRSCAN	IPR001452; IPR036028; IPR001452	SH3domain; SH3-likedomainsuperfamily	N	-137.35	-	No					-0.993594	0.00583336
698	AgB01_g702_t01	hypothetical_protein	Unknown product	Unknown			M	53	0	0	C(3.97)	5	0	ExpAA=0.00 First60=0.00 PredHel=0 Topology=o	53	0						CYT		5.609	4.93			0.621	5.346	0.011	cyt						AgB01_g702_t01-IPRSCAN			N	Too short sequence	-	No					-1.06031	0.00405333
699	AgB01_g703_t06	hypothetical_protein	Unknown product	Unknown			M	111	0	1		2	0	ExpAA=0.00 First60=0.00 PredHel=0 Topology=o	111	0						CYT		12.65	6.02			0.884	5.294	0.011	cyt						AgB01_g703_t06-IPRSCAN			N	Too short sequence	-	No					-1.0211	0.00502083
700	AgB01_g704_t01	hypothetical_protein	Unknown product	Unknown			A	110	0	0		2	0	ExpAA=23.07 First60=0.28 PredHel=1 Topology=o62-84i	110	1	20	56.4	23.6		26	ANC		12.755	8.69			0.03	0.561	0.001	nuc						AgB01_g704_t01-IPRSCAN			N	Too short sequence	-	No					-0.95412	0.00723294
701	AgB01_g705_t01	227_kDa_spindle-_and_centromere-associated_protein	Unknown product	Unknown			W	74	0	0		0	0	ExpAA=0.00 First60=0.00 PredHel=0 Topology=i	74	0						CYT		8.762	9.81			0.797	3.47	0.007	nuc						AgB01_g705_t01-IPRSCAN			N	Too short sequence	-	No					-1.00894	0.005365
702	AgB01_g706_t01	hypothetical_protein	hypothetical secreted protein precursor	Secreted / Unknown			M	336	0	1		8	0	ExpAA=19.71 First60=19.70 PredHel=1 Topology=i13-35o	336	1	6.5	89.6	3.9		301	SIG	33-34	39.352	9.37	35.293	9.19	0.942	6.886	0.014	nuc						AgB01_g706_t01-IPRSCAN			N	-166.11	-	No					-0.921977	0.00861503
703	AgB01_g707_t01	hypothetical_protein	Unknown product	Unknown			M	130	0	0		1	0	ExpAA=22.63 First60=22.63 PredHel=1 Topology=o5-27i	130	1	16.9	3.8	79.2		103	ANC		14.907	9.63	12.515	9.76	0.407	1.668	0.003	nuc						AgB01_g707_t01-IPRSCAN			N	Too short sequence	-	No					-0.882388	0.0106814
704	AgB01_g708_t06	Condensin-2_complex_subunit_D3	attachment of mitotic spindle microtubules to kinetochore - chromosome separation - histone binding - meiotic chromosome condensation - embryo - probable fragment	Cytoskeletal	GO	8e-86	L	1181	0	4		25	0	ExpAA=0.23 First60=0.02 PredHel=0 Topology=o	1181	0						CYT		133.972	5.72			0.373	0.713	0.001	cyt	KKKRRRR|GN 0.635 *ProP*	PF12717	non-SMC mitotic condensation complex subunit 1	PTHR14222:SF1	4.4e-157	AgB01_g708_t06-IPRSCAN	IPR016024; IPR032682; IPR011989; IPR026971	Armadillo-typefold; Condensincomplexsubunit1,C-terminal; Armadillo-likehelical; Condensinsubunit1/Condensin-2complexsubunitD3	N	-217.53	-	No					-0.966137	0.00677478
705	AgB01_g709_t02	Mitochondrial-processing_peptidase_subunit_alpha	Mitochondrial-processing peptidase subunit alpha	Energy Metabolism	NR	0	M	546	0	1		12	0	ExpAA=0.03 First60=0.00 PredHel=0 Topology=o	546	0						CYT		60.921	6.26			0.538	1.185	0.002	mit	VLCRRFR|SV 0.588 *ProP*	PF05193; PF00675	Peptidase M16 inactive domain; Insulinase (Peptidase family M16)	PTHR11851:SF183	6.4e-181	AgB01_g709_t02-IPRSCAN	IPR037715; IPR007863; IPR001431; IPR011249; IPR011765; IPR011249	Mitochondrial-processingpeptidasesubunitalpha; PeptidaseM16,C-terminal; PeptidaseM16,zinc-bindingsite; Metalloenzyme,LuxS/M16peptidase-like; PeptidaseM16,N-terminal	N	-146.25	-	No					-0.97114	0.00659266
706	AgB01_g710_t02	Glutaredoxin-C8	Glutaredoxin	Post-translation Modification	KOG	6e-26	M	247	0	0		4	0	ExpAA=19.78 First60=19.76 PredHel=1 Topology=o28-47i	247	1	7.7	11.3	81		200	CYT		28.081	5.94			0.482	1.081	0.002	nuc		PF06936; PF00462	Selenoprotein S (SelS); Glutaredoxin	PTHR10168	1.2e-28	AgB01_g710_t02-IPRSCAN	IPR009703; IPR036249; IPR002109; IPR011899; IPR014025; IPR014025	SelenoproteinS; Thioredoxin-likesuperfamily; Glutaredoxin; Glutaredoxin,eukaryotic/virial; Glutaredoxinsubgroup	N	-210.88	-	No					-0.98478	0.00612048
707	AgB01_g711_t01	GTPase_1	Mitochondrial GTPase 1 - ribosome biogenesis - mitochondrion - GTPase	Energy Metabolism	GO	0	M	366	0	0		8	0	ExpAA=0.15 First60=0.15 PredHel=0 Topology=o	366	0						BL	17-18	42.634	9.48	40.814	9.52	0.433	0.817	0.002	cyt		PF01926	50S ribosome-binding GTPase	PTHR11089:SF4	8.3e-76	AgB01_g711_t01-IPRSCAN	IPR023179; IPR027417; IPR006073	GTP-bindingprotein,orthogonalbundledomainsuperfamily; P-loopcontainingnucleosidetriphosphatehydrolase; GTPbindingdomain	N	-172.82	-	No					-1.04233	0.00447148
708	AgB01_g712_t04	Putative_elongator_complex_protein_4	RNA polymerase II elongator complex subunit ELP4	Nuclear Regulation	KOG	1e-48	M	348	0	2		6	0	ExpAA=0.02 First60=0.02 PredHel=0 Topology=o	348	0						CYT		38.948	6.01			0.386	0.717	0.001	nuc		PF05625	PAXNEB protein	PTHR12896	2.6e-65	AgB01_g712_t04-IPRSCAN	IPR008728; IPR008728	Elongatorcomplexprotein4	N	-138.15	-	No					-0.913705	0.00901117
709	AgB01_g713_t02	zinc_c2h2_type_family_protein	Unknown product	Unknown			M	946	0	6		18	0	ExpAA=0.23 First60=0.00 PredHel=0 Topology=o	946	0						CYT		106.588	6.46			0.552	1.355	0.003	nuc	RRGRKQR|LT 0.650 *ProP* ; RPSRHRR|KP 0.628 *ProP*					AgB01_g713_t02-IPRSCAN	IPR013087; IPR000953; IPR016197	ZincfingerC2H2-type; Chromo/chromoshadowdomain; Chromo-likedomainsuperfamily	N	-152.24	-	No					-0.924327	0.00850564
710	AgB01_g714_t01	Cyclin-H	Cdk activating kinase (CAK)/RNA polymerase II transcription initiation/nucleotide excision repair factor TFIIH/TFIIK	Nuclear Regulation	KOG	5e-59	M	323	0	0		3	0	ExpAA=0.89 First60=0.00 PredHel=0 Topology=o	323	0						CYT		37.455	5.3			0.461	0.885	0.002	cyt		PF00134; PF16899	Cyclin, N-terminal domain; Cyclin C-terminal domain	PTHR10026:SF8	2.8e-66	AgB01_g714_t01-IPRSCAN	IPR036915; IPR006671; IPR031658; IPR013763	Cyclin-likesuperfamily; Cyclin,N-terminal; Cyclin,C-terminaldomain2; Cyclin-like	N	-150.67	-	No					-0.997138	0.00572174
711	AgB01_g715_t01	hypothetical_protein	Unknown product	Unknown			M	148	0	0	D(3.17)	0	0	ExpAA=0.00 First60=0.00 PredHel=0 Topology=o	148	0						CYT		17.128	4.03			0.898	5.652	0.011	nuc						AgB01_g715_t01-IPRSCAN			N	Too short sequence	-	No					-1.03724	0.00459736
712	AgB01_g716_t01	Adenosine_3'-phospho_5'-phosphosulfate_transporter_1	Unknown product - 3 predicted membrane helices	Unknown / membrane			M	106	0	0		2	0	ExpAA=44.55 First60=27.04 PredHel=2 Topology=o15-37i54-76o	106	2	41.5	42.5	16		30	BL	17-18	11.924	6.8	9.99	8.04	0.591	1.538	0.003	gol		PF08449	UAA transporter family	PTHR10778	7.3e-28	AgB01_g716_t01-IPRSCAN	IPR013657	UAAtransporter	N	Too short sequence	-	No					-0.852293	0.0125739
713	AgB01_g717_t02	Neuronal_calcium_sensor_1	Ca2+ sensor (EF-Hand superfamily)	Signal Transduction	KOG	1e-66	M	208	0	2		1	0	ExpAA=0.00 First60=0.00 PredHel=0 Topology=o	208	0						CYT		23.784	4.99			0.388	0.732	0.001	nuc		PF00036; PF13499	EF hand; EF-hand domain pair	PTHR23055	1.9e-109	AgB01_g717_t02-IPRSCAN	IPR002048; IPR018247; IPR011992; IPR002048	EF-handdomain; EF-Hand1,calcium-bindingsite; EF-handdomainpair	N	-243.09	-	No					-0.9616	0.00694427
714	AgB01_g718_t01	hypothetical_protein	Unknown product	Unknown			V	111	0	0		4	0	ExpAA=0.00 First60=0.00 PredHel=0 Topology=o	111	0						CYT		12.292	9.3			0.894	5.69	0.011	nuc	KEILKRR|SV 0.517 *ProP*					AgB01_g718_t01-IPRSCAN			N	Too short sequence	-	No					-0.975954	0.00642201
715	AgB01_g719_t02	Tau-tubulin_kinase_2	CK1 protein kinase (Loa loa) - probable fragment	Signal Transduction	NR	4e-49	M	158	0	0		2	0	ExpAA=0.03 First60=0.00 PredHel=0 Topology=o	158	0						CYT		17.63	10.01			0.661	1.798	0.004	nuc						AgB01_g719_t02-IPRSCAN	IPR011009	Proteinkinase-likedomainsuperfamily	N	Too short sequence	-	No					-0.868112	0.0115411
716	AgB01_g722_t01	hypothetical_protein	hypothetical protein ASU_01075	Uncharacterized	NR	0	M	301	0	2		3	0	ExpAA=0.01 First60=0.01 PredHel=0 Topology=o	301	0						CYT		33.977	9.22			0.661	1.821	0.004	nuc		PF00402	Calponin family repeat			AgB01_g722_t01-IPRSCAN	IPR000557; IPR000557	Calponinrepeat	N	-236.53	-	No					-0.925825	0.00843668
717	AgB01_g723_t03	semaphorin-5a	Thrombospondin type 1 repeats	Extracellular Matrix	SMART	2e-14	M	311	0	0		16	0	ExpAA=0.00 First60=0.00 PredHel=0 Topology=o	311	0						CYT		35.912	8.12			0.532	1.174	0.002	mit	AATRSKR|SL 0.679 *ProP*	PF00090	Thrombospondin type 1 domain	PTHR16311	8.9e-21	AgB01_g723_t03-IPRSCAN	IPR000884; IPR036383; IPR036383	Thrombospondintype-1(TSP1)repeat; Thrombospondintype-1(TSP1)repeatsuperfamily	N	-125.02	-	No					-0.939702	0.00782331
718	AgB01_g724_t01	hypothetical_protein	Unknown product	Unknown			F	252	0	0		3	0	ExpAA=0.45 First60=0.00 PredHel=0 Topology=o	252	0						CYT		28.788	8.88			0.271	0.508	0.001	nuc						AgB01_g724_t01-IPRSCAN			N	-172.32	-	No					-0.905268	0.00943385
719	AgB01_g725_t01	hypothetical_protein	Thrombospondin type 1 repeats - Membrane anchor detected	Extracellular Matrix / membrAnchor	SMART	7e-05	R	122	0	0		6	0	ExpAA=27.42 First60=27.30 PredHel=1 Topology=i21-43o	122	1	18	64.8	17.2		79	BL/ANC		14.038	8.63			0.883	1.822	0.004	nuc		PF00090	Thrombospondin type 1 domain			AgB01_g725_t01-IPRSCAN	IPR036383; IPR000884; IPR036383	Thrombospondintype-1(TSP1)repeatsuperfamily; Thrombospondintype-1(TSP1)repeat	N	Too short sequence	-	No					-0.868211	0.011535
720	AgB01_g726_t01	hypothetical_protein	Unknown product	Unknown			M	163	0	0		5	0	ExpAA=0.00 First60=0.00 PredHel=0 Topology=o	163	0						CYT		18.778	9.8			0.847	2.511	0.005	nuc	LVTRWFR|KV 0.530 *ProP*					AgB01_g726_t01-IPRSCAN			N	Too short sequence	-	No					-1.05253	0.00422939
721	AgB01_g727_t01	hypothetical_protein	Unknown product	Unknown			M	203	0	0		2	0	ExpAA=22.90 First60=15.98 PredHel=1 Topology=o45-67i	203	1	10.8	22.2	67		136	ANC		22.19	6.63	20.187	8.97	0.498	1.182	0.002	nuc	TKRREGR|AA 0.605 *ProP*					AgB01_g727_t01-IPRSCAN			N	-210.28	-	No					-0.850583	0.0126908
722	AgB01_g728_t04	Disks_large_1_tumor_suppressor_protein	Calcium/calmodulin-dependent serine protein kinase/membrane-associated guanylate kinase	Signal Transduction	KOG	3e-60	M	897	0	2		4	0	ExpAA=0.00 First60=0.00 PredHel=0 Topology=o	897	0						CYT		99.991	6.18			0.486	0.979	0.002	nuc	PIQRPPR|EV 0.508 *ProP*	PF00625; PF00595; PF00595; PF00595; PF00018; PF09058	Guanylate kinase; PDZ domain (Also known as DHR or GLGF); PDZ domain (Also known as DHR or GLGF); PDZ domain (Also known as DHR or GLGF); SH3 domain; L27_1	PTHR23119	2.7e-239	AgB01_g728_t04-IPRSCAN	IPR008145; IPR001478; IPR001452; IPR008144; IPR027417; IPR036028; IPR004172; IPR015143; IPR036034; IPR036892; IPR020590; IPR001478	Guanylatekinase/L-typecalciumchannelbetasubunit; PDZdomain; SH3domain; Guanylatekinase-likedomain; P-loopcontainingnucleosidetriphosphatehydrolase; SH3-likedomainsuperfamily; L27domain; L27-1; PDZsuperfamily; L27domainsuperfamily; Guanylatekinase,conservedsite	N	-181.37	-	No					-0.959114	0.00703892
723	AgB01_g729_t01	integrator_complex_subunit_1	integrator complex subunit 1 - negative regulation of cysteine-type endopeptidase involved in apoptotic process - negative regulation of apoptotic - probable fragment	Post-translational Modifications / protease	GO	0	M	1766	0	3		43	0	ExpAA=2.56 First60=0.00 PredHel=0 Topology=o	1766	0						CYT		196.999	5.89			0.427	0.824	0.002	nuc		PF12432	Protein of unknown function (DUF3677)	PTHR21224	7.7e-212	AgB01_g729_t01-IPRSCAN	IPR022145	DomainofunknownfunctionDUF3677	N	-206.35	-	No					-0.925391	0.00845658
724	AgB01_g730_t01	hypothetical_protein	hypothetical secreted protein precursor	Secreted / Unknown			M	105	0	0		3	0	ExpAA=8.34 First60=3.23 PredHel=0 Topology=o	105	0						SIG	28-29	12.484	5.85	9.186	6.77	0.98	7.351	0.015	exc						AgB01_g730_t01-IPRSCAN			N	Too short sequence	-	No					-0.771482	0.0194484
725	AgB01_g731_t03	hypothetical_protein	Unknown product	Unknown			M	99	0	0		5	0	ExpAA=0.43 First60=0.34 PredHel=0 Topology=o	99	0						CYT		11.17	8.69			0.894	5.595	0.011	mit						AgB01_g731_t03-IPRSCAN			N	Too short sequence	-	No					-0.970631	0.00661098
726	AgB01_g732_t01	Mannose-P-dolichol_utilization_defect_1_protein	endoplasmic reticulum membrane protein Lec35/MPDU1 involved in monosaccharide-P-dolichol utilization - signalP detected - 4 predicted membrane helices	Post-translational Modifications / membrane	KOG	9e-38	M	191	0	0		3	0	ExpAA=106.08 First60=25.61 PredHel=4 Topology=i21-40o60-82i89-111o158-180i	191	4	44.5	35.1	20.4			SIG	40-41	20.912	9.43	16.727	9.33	0.781	3.573	0.007	end		PF04193; PF04193	PQ loop repeat; PQ loop repeat	PTHR12226:SF2	6.4e-71	AgB01_g732_t01-IPRSCAN	IPR006603; IPR016817; IPR006603	PQ-looprepeat; Mannose-P-dolicholutilizationdefect1protein	N	Too short sequence	-	No					-0.920771	0.0086717
727	AgB01_g733_t02	microtubule-associated_protein_futsch	microtubule-associated protein futsch	Cytoskeletal	NR	0	M	979	0	2		8	0	ExpAA=0.00 First60=0.00 PredHel=0 Topology=o	979	0						CYT		109.818	9.95			0.614	1.501	0.003	nuc	SDVRKRK|AV 0.502 *ProP* ; SASRKGR|VT 0.603 *ProP* ; SKQRHPR|MW 0.633 *ProP*					AgB01_g733_t02-IPRSCAN			N	-179.33	-	No					-0.922551	0.00858816
728	AgB01_g734_t01	Translational_activator_GCN1	Conserved plasma membrane protein	Uncharacterized / membrane	CDD	0	M	592	0	2		10	0	ExpAA=20.67 First60=0.36 PredHel=1 Topology=o564-586i	592	1	3.7	95.3	1		6	CYT		64.338	5.76			0.437	0.843	0.002	nuc		PF12348	CLASP N terminal	PTHR23346:SF7	2.2e-160	AgB01_g734_t01-IPRSCAN	IPR021133; IPR011989; IPR016024; IPR033173; IPR024395	HEAT,type2; Armadillo-likehelical; Armadillo-typefold; TranslationalactivatorGcn1; CLASPN-terminaldomain	N	-140.23	-	No					-0.952942	0.00727947
729	AgB01_g735_t01	Transmembrane_protein_39A	Conserved plasma membrane protein - probable fragment - 4 predicted membrane helices	Uncharacterized / membrane	KOG	0	M	190	0	0	W(3.3)	4	0	ExpAA=60.69 First60=0.16 PredHel=3 Topology=i61-80o100-117i151-173o	190	3	30.5	19.5	50			BL/ANC		21.934	9.27			0.934	6.49	0.013	nuc		PF10271	Putative transmembrane protein	PTHR12995	5.4e-39	AgB01_g735_t01-IPRSCAN	IPR019397; IPR019397	UncharacterisedproteinfamilyTMEM39	N	Too short sequence	-	No					-1.01497	0.00519152
730	AgB01_g736_t02	G-protein-signaling_modulator_1	G-protein-signaling modulator 1	Protein Export	NR	0	M	487	0	2		9	0	ExpAA=0.02 First60=0.02 PredHel=0 Topology=o	487	0						CYT		52.938	5.65			0.563	1.244	0.002	nuc		PF02188; PF02188; PF02188	GoLoco motif; GoLoco motif; GoLoco motif	PTHR10098	3e-37	AgB01_g736_t02-IPRSCAN	IPR003109; IPR011990; IPR003109	GoLocomotif; Tetratricopeptide-likehelicaldomainsuperfamily	N	-140.08	-	No					-0.951312	0.00734433
731	AgB01_g737_t01	3',5'-cyclic_phosphodiesterase_pde-4	Cyclic nucleotide phosphodiesterase - probable fragment	Signal Transduction	KOG	8e-30	M	305	0	1		5	0	ExpAA=0.05 First60=0.00 PredHel=0 Topology=o	305	0						CYT		34.663	5.3			0.867	4.864	0.01	nuc	SGVRKLR|ST 0.542 *ProP*			PTHR11347:SF174	4e-67	AgB01_g737_t01-IPRSCAN	IPR036971	3'5'-cyclicnucleotidephosphodiesterase,catalyticdomainsuperfamily	N	-166.12	-	No					-0.949123	0.00743237
732	AgB01_g738_t01	Transthyretin-like_protein_46	transthyretin-like protein 46	Uncharacterized	NR	1e-83	F	156	0	0		4	0	ExpAA=0.08 First60=0.08 PredHel=0 Topology=o	156	0						BL	34-35	17.895	5.02	14.137	4.92	0.768	3.071	0.006	nuc		PF01060	Transthyretin-like family	PTHR21700	2.5e-63	AgB01_g738_t01-IPRSCAN	IPR001534; IPR038479	Transthyretin-like; Transthyretin-likesuperfamily	N	Too short sequence	-	No					-0.974406	0.0064764
733	AgB01_g739_t01	EF-hand_domain-containing_protein_D2	EF hand-containing protein 1 - extracellular exosome - neuron projection development - mitochondrial inner membrane - calcium ion binding	Protein Export	GO	2e-42	M	222	0	0		4	0	ExpAA=0.00 First60=0.00 PredHel=0 Topology=o	222	0						CYT		25.331	5.53			0.138	0.282	0.001	mit		PF13499	EF-hand domain pair	PTHR13025	1.4e-81	AgB01_g739_t01-IPRSCAN	IPR002048; IPR018247; IPR011992; IPR002048	EF-handdomain; EF-Hand1,calcium-bindingsite; EF-handdomainpair	N	-256.28	-	No					-0.91993	0.00871141
734	AgB01_g740_t02	Galectin-8	Galectin-8 - probable fragment	Secreted	NR	1e-73	M	163	0	0		3	0	ExpAA=0.27 First60=0.27 PredHel=0 Topology=o	163	0						CYT		18.323	6.06			0.686	2.166	0.004	nuc		PF00337	Galactoside-binding lectin	PTHR11346:SF116	1.4e-48	AgB01_g740_t02-IPRSCAN	IPR001079; IPR013320; IPR001079	Galectin,carbohydraterecognitiondomain; ConcanavalinA-likelectin/glucanasedomainsuperfamily	N	Too short sequence	-	No					-0.971574	0.0065771
735	AgB01_g741_t01	hypothetical_protein	Unknown product	Unknown			K	121	0	0		3	0	ExpAA=0.04 First60=0.04 PredHel=0 Topology=o	121	0						BL	19-20	13.913	7.91	11.487	6.75	0.563	1.412	0.003	nuc						AgB01_g741_t01-IPRSCAN			N	Too short sequence	-	No					-0.884027	0.0105869
736	AgB01_g742_t01	microtubule-associated_protein_futsch	Unknown product	Unknown			R	143	0	0		3	0	ExpAA=2.84 First60=2.76 PredHel=0 Topology=o	143	0						CYT		16.48	9.9			0.592	1.49	0.003	mit						AgB01_g742_t01-IPRSCAN			N	Too short sequence	-	No					-0.880684	0.0107806
737	AgB01_g743_t01	Transmembrane_protein_39A	Transmembrane protein 39A - xenophagy - positive regulation of mitophagy in response to mitochondrial depolarization - integral component of membrane - probable fragment - 4 predicted membrane helices	Energy Metabolism / membrane	GO	4e-37	M	289	0	1		6	0	ExpAA=86.73 First60=1.24 PredHel=4 Topology=i59-81o96-118i214-236o241-258i	289	4	28.7	6.9	64.4			CYT		32.381	5.9			0.437	1.57	0.003	end		PF10271	Putative transmembrane protein	PTHR12995	9.8e-78	AgB01_g743_t01-IPRSCAN	IPR019397; IPR019397	UncharacterisedproteinfamilyTMEM39	N	-79.69	-	No					-0.921495	0.00863761
738	AgB01_g744_t01	Exportin-5	Unknown product	Unknown			M	172	0	0		6	0	ExpAA=6.83 First60=0.00 PredHel=0 Topology=o	172	0						CYT		19.803	6.2			0.738	2.78	0.006	nuc	RCMRIVR|SA 0.621 *ProP*			PTHR11223:SF3	4.1e-12	AgB01_g744_t01-IPRSCAN	IPR016024; IPR011989	Armadillo-typefold; Armadillo-likehelical	N	Too short sequence	-	No					-0.962462	0.00691173
739	AgB01_g745_t01	Exportin-5	exportin-5 - probable fragment	Uncharacterized	NR	0	M	318	0.314465	1	X(46.31)	6	0.314465	ExpAA=0.02 First60=0.01 PredHel=0 Topology=o	318	0						CYT		35.798	5.22			0.68	1.832	0.004	cyt		PF08389	Exportin 1-like protein	PTHR11223	7.2e-54	AgB01_g745_t01-IPRSCAN	IPR013598; IPR011989; IPR016024	Exportin-1/Importin-beta-like; Armadillo-likehelical; Armadillo-typefold	N	-132.02	-	No					-0.990555	0.00593081
740	AgB01_g746_t01	Exportin-5	exportin 5 - positive regulation of RNA interference - nucleocytoplasmic carrier - pre-miRNA binding - regulation of protein export from nucleus - - probable fragment - GPI anchored	Transporters / GPI	GO	2e-22	F	523	0	2		18	0	ExpAA=13.83 First60=13.27 PredHel=0 Topology=o	523	0						BL	37-38	59.348	6.54	55.19	6.06	0.646	1.653	0.003	end	WIRRSWR|FV 0.520 *ProP*			PTHR11223	1.7e-38	AgB01_g746_t01-IPRSCAN	IPR011989	Armadillo-likehelical	Y	-119.4	-	No					-0.993169	0.00584692
741	AgB01_g747_t02	Exportin-5	Unknown product	Unknown			M	162	0	0		5	0	ExpAA=0.00 First60=0.00 PredHel=0 Topology=o	162	0						CYT		18.884	5.42			0.778	3.044	0.006	mit						AgB01_g747_t02-IPRSCAN			N	Too short sequence	-	No					-0.994403	0.0058077
742	AgB01_g748_t01	putative_g-protein_coupled_receptor	hypothetical secreted protein precursor	Secreted / Unknown			M	127	0	1		4	0	ExpAA=0.07 First60=0.07 PredHel=0 Topology=o	127	0						SIG	20-21	14.47	4.73	12.153	5.05	0.96	7.241	0.014	end				PTHR33995:SF8	8.2e-20	AgB01_g748_t01-IPRSCAN			N	Too short sequence	-	No					-0.960126	0.00700022
743	AgB01_g749_t01	putative_g-protein_coupled_receptor	Unknown product	Unknown			F	104	0	0		4	0	ExpAA=0.79 First60=0.79 PredHel=0 Topology=o	104	0						CYT		11.644	9.68			0.975	7.351	0.015	nuc	RRFRFAR|SL 0.644 *ProP*					AgB01_g749_t01-IPRSCAN			N	Too short sequence	-	No					-0.975396	0.00644157
744	AgB01_g750_t03	Peroxisomal_acyl-coenzyme_A_oxidase_1	Acyl-CoA oxidase dehydrogenase and Acyl-CoA oxidase domain containing protein	Lipid Metabolism	NR	0	M	589	0	1		11	0	ExpAA=1.70 First60=0.00 PredHel=0 Topology=o	589	0						CYT		66.513	8.16			0.567	1.302	0.003	mit		PF02770; PF01756; PF14749	Acyl-CoA dehydrogenase, middle domain; Acyl-CoA oxidase; Acyl-coenzyme A oxidase N-terminal	PTHR10909:SF351	1e-229	AgB01_g750_t03-IPRSCAN	IPR006091; IPR036250; IPR002655; IPR012258; IPR009100; IPR037069; IPR029320	Acyl-CoAoxidase/dehydrogenase,centraldomain; Acyl-CoAdehydrogenase-like,C-terminal; Acyl-CoAoxidase,C-terminal; Acyl-CoAoxidase; Acyl-CoAdehydrogenase/oxidase,N-terminalandmiddledomainsuperfamily; Acyl-CoAdehydrogenase/oxidase,N-terminaldomainsuperfamily; Acyl-coenzymeAoxidase,N-terminal	N	-135.05	-	No					-0.96791	0.00670968
745	AgB01_g751_t02	ribonuclease_p_protein_1-like_protein	Unknown product	Unknown			M	522	0	0		9	0	ExpAA=4.64 First60=4.63 PredHel=0 Topology=o	522	0						BL	35-36	61.694	9.16	57.397	8.8	0.538	3.485	0.007	nuc	RRVRHHR|YS 0.538 *ProP*			PTHR13563:SF12	6.1e-32	AgB01_g751_t02-IPRSCAN	IPR028564; IPR007356; IPR007356	tRNAmethyltransferaseTRM10-typedomain; tRNA(guanine-N1-)-methyltransferase,eukaryotic	N	-183.98	-	No					-0.916	0.00889949
746	AgB01_g752_t01	gata_zinc_finger_domain-containing_protein_1	Unknown product	Unknown			K	242	0	0		3	0	ExpAA=0.04 First60=0.03 PredHel=0 Topology=o	242	0						CYT		28.028	9.25			0.464	0.981	0.002	mit				PTHR13340	1.2e-32	AgB01_g752_t01-IPRSCAN			N	-235.1	-	No					-0.979686	0.00629275
747	AgB01_g753_t01	protein_unc-1	Prohibitins and stomatins of the PID superfamily - 3 predicted membrane helices	Energy Metabolism / membrane	KOG	0	M	286	0	2		4	0	ExpAA=37.94 First60=22.89 PredHel=2 Topology=o30-52i65-87o	286	2	15.4	80.1	4.5			BL/ANC		31.742	5.57			0.606	1.43	0.003	nuc		PF01145	SPFH domain / Band 7 family	PTHR10264	2.8e-192	AgB01_g753_t01-IPRSCAN	IPR001107; IPR036013; IPR028522; IPR018080; IPR001972; IPR001107	Band7domain; Band7/SPFHdomainsuperfamily; ProteinUnc-1; Band7/stomatin-like,conservedsite; Stomatinfamily	N	-130.77	-	No					-0.984348	0.0061349
748	AgB01_g754_t01	protein_unc-1	Unknown product	Unknown			M	64	0	0	Y(3.17)	1	0	ExpAA=33.51 First60=33.21 PredHel=1 Topology=i13-35o	64	1	34.4	45.3	20.3		29	CYT		7.26	6.5			0.949	6.935	0.014	nuc						AgB01_g754_t01-IPRSCAN			N	Too short sequence	-	No					-0.831224	0.0140921
749	AgB01_g755_t01	hypothetical_protein	Unknown product	Unknown			Y	90	0	1	F(4.47)	4	0	ExpAA=35.65 First60=32.49 PredHel=1 Topology=o15-37i	90	1	24.4	16.7	58.9		53	ANC		11.087	8.81	5.681	9.42	0.138	0.283	0.001	nuc						AgB01_g755_t01-IPRSCAN			N	Too short sequence	-	No					-1.00989	0.00533744
750	AgB01_g756_t01	LAG1_longevity_assurance_5	Protein transporter of the TRAM (translocating chain-associating membrane) superfamily - 7 predicted membrane helices	Protein Export / membrane	KOG	7e-56	M	339	0	0	W(4.23)	3	0	ExpAA=139.96 First60=18.31 PredHel=7 Topology=o43-65i95-114o134-156i177-199o214-232i237-256o271-293i	339	7	42.5	27.4	30.1			CYT		39.911	6.45			0.115	0.239	0	end	GKSKFKR|VA 0.525 *ProP*	PF03798	TLC domain	PTHR12560	4.5e-87	AgB01_g756_t01-IPRSCAN	IPR006634; IPR016439; IPR016439	TRAM/LAG1/CLN8homologydomain; SphingosineN-acyltransferaseLag1/Lac1-like	N	-50.62	-	No					-0.923624	0.00853823
751	AgB01_g757_t01	hypothetical_protein	Unknown product	Unknown			M	126	0	0		7	0	ExpAA=0.07 First60=0.07 PredHel=0 Topology=i	126	0						CYT		13.892	6.07			0.555	1.21	0.002	mit						AgB01_g757_t01-IPRSCAN			N	Too short sequence	-	No					-0.880417	0.0107962
752	AgB01_g758_t01	nascent_polypeptide-associated_complex_subunit_alpha	Transcription factor containing NAC and TS-N - probable fragment	Transcription Factor	KOG	6e-54	M	157	0	0		2	0	ExpAA=0.00 First60=0.00 PredHel=0 Topology=o	157	0						CYT		17.201	7.73			0.622	1.601	0.003	nuc		PF01849	NAC domain	PTHR21713	2.4e-75	AgB01_g758_t01-IPRSCAN	IPR002715; IPR038187; IPR016641; IPR016641	Nascentpolypeptide-associatedcomplexNACdomain; NACA/Bdomainsuperfamily; Nascentpolypeptide-associatedcomplexsubunitalpha	N	Too short sequence	-	No					-0.109546	0.427854
753	AgB01_g759_t02	60s_ribosomal_protein_l17	60s ribosomal protein l17	Protein Synthesis	NR	0	M	186	0	0		4	0	ExpAA=0.00 First60=0.00 PredHel=0 Topology=o	186	0						CYT		21.657	10.07			0.573	1.742	0.003	nuc	MRRRTYR|AH 0.594 *ProP*	PF00237	Ribosomal protein L22p/L17e	PTHR11593	5.3e-90	AgB01_g759_t02-IPRSCAN	IPR005721; IPR001063; IPR036394; IPR018260; IPR036394	RibosomalproteinL22/L17,eukaryotic/archaeal; RibosomalproteinL22/L17; RibosomalproteinL22/L17superfamily; RibosomalproteinL22/L17,conservedsite	N	Too short sequence	-	No					-1.01002	0.00533373
754	AgB01_g760_t01	hypothetical_protein	Unknown product - 4 predicted membrane helices - GPI anchored	Unknown / membrane / GPI			M	196	0	0		9	0	ExpAA=87.59 First60=31.94 PredHel=4 Topology=i13-30o50-72i84-106o142-164i	196	4	42.3	28.6	29.1			ANC		22.072	4.93	17.763	4.89	0.294	0.694	0.001	end						AgB01_g760_t01-IPRSCAN			Y	Too short sequence	-	No					-0.897469	0.00984201
755	AgB01_g761_t01	hypothetical_protein	Unknown product	Unknown			M	314	0	1		5	0	ExpAA=0.00 First60=0.00 PredHel=0 Topology=o	314	0						CYT		35.696	5.81			0.83	3.835	0.008	nuc						AgB01_g761_t01-IPRSCAN			N	-195.67	-	No					-0.953829	0.0072444
756	AgB01_g762_t03	Nucleoporin-17	Nucleoporin-17 - probable fragment - signalP detected	Nuclear Export	NR	0	M	427	0	0		8	0	ExpAA=12.83 First60=10.56 PredHel=0 Topology=o	427	0						SIG	26-27	47.872	7.61	44.759	7.22	0.597	1.4	0.003	mit		PF00400; PF00400; PF00400	WD domain, G-beta repeat; WD domain, G-beta repeat; WD domain, G-beta repeat	PTHR10971	6.4e-140	AgB01_g762_t03-IPRSCAN	IPR017986; IPR001680; IPR019775; IPR015943; IPR037631; IPR036322; IPR020472; IPR001680	WD40-repeat-containingdomain; WD40repeat; WD40repeat,conservedsite; WD40/YVTNrepeat-like-containingdomainsuperfamily; mRNAexportfactorGle2/RAE1; WD40-repeat-containingdomainsuperfamily; G-proteinbetaWD-40repeat	N	-125.6	-	No					-0.78787	0.0178066
757	AgB01_g763_t01	hypothetical_protein	Unknown product - 3 predicted membrane helices	Unknown / membrane			M	133	0	0	F(4.63)	8	0	ExpAA=63.00 First60=32.43 PredHel=3 Topology=o18-40i52-74o84-103i	133	3	47.4	21.1	31.6			BL	18-19	15.928	4.81	13.56	4.59	0.125	0.263	0.001	cyt						AgB01_g763_t01-IPRSCAN			N	Too short sequence	-	No					-1.01375	0.00522624
758	AgB01_g764_t02	Hydroxymethylglutaryl-CoA_lyase	Hydroxymethylglutaryl-CoA lyase - probable fragment	Energy Metabolism	KOG	7e-44	M	135	0	0		2	0	ExpAA=0.00 First60=0.00 PredHel=0 Topology=o	135	0						CYT		15.404	9.65			0.828	3.896	0.008	mit		PF00682	HMGL-like	PTHR42738:SF4	5.6e-50	AgB01_g764_t02-IPRSCAN	IPR000891; IPR027167; IPR013785	Pyruvatecarboxyltransferase; Hydroxymethylglutaryl-CoAlyase; Aldolase-typeTIMbarrel	N	Too short sequence	-	No					-0.931631	0.00817445
759	AgB01_g765_t01	spectrin_alpha_chain	spectrin alpha chain	Cytoskeletal	NR	0	M	2433	0	5		18	0	ExpAA=0.00 First60=0.00 PredHel=0 Topology=o	2433	0						CYT		282.762	5.25			0.237	0.453	0.001	nuc	QVQRFNR|DI 0.606 *ProP*	PF00435; PF00435; PF00435; PF00435; PF00435; PF00435; PF00435; PF00435; PF00435; PF00435; PF00435; PF00435; PF00435; PF00435; PF00435; PF00435; PF00435; PF00435; PF00435; PF00435; PF13499; PF08726; PF00018	Spectrin repeat; Spectrin repeat; Spectrin repeat; Spectrin repeat; Spectrin repeat; Spectrin repeat; Spectrin repeat; Spectrin repeat; Spectrin repeat; Spectrin repeat; Spectrin repeat; Spectrin repeat; Spectrin repeat; Spectrin repeat; Spectrin repeat; Spectrin repeat; Spectrin repeat; Spectrin repeat; Spectrin repeat; Spectrin repeat; EF-hand domain pair; Ca2+ insensitive EF hand; SH3 domain	PTHR44262	0	AgB01_g765_t01-IPRSCAN	IPR002048; IPR002017; IPR036028; IPR001452; IPR018159; IPR011992; IPR018247; IPR035825; IPR014837; IPR001452	EF-handdomain; Spectrinrepeat; SH3-likedomainsuperfamily; SH3domain; Spectrin/alpha-actinin; EF-handdomainpair; EF-Hand1,calcium-bindingsite; AlphaSpectrin,SH3domain; EF-hand,Cainsensitive	N	-432.66	-	No					-0.957611	0.00709674
760	AgB01_g766_t01	Spectrin_alpha_chain	Unknown product - GPI anchored	Unknown / GPI			M	50	0	0	C(3.37)	4	0	ExpAA=11.10 First60=11.10 PredHel=0 Topology=o	50	0						BL/SIG		6.275	9.88			0.88	5.332	0.011	nuc						AgB01_g766_t01-IPRSCAN			Y	Too short sequence	-	No					-1.01124	0.00529829
761	AgB01_g767_t06	prion-like_domain-bearing_protein_25	prion-like domain-bearing protein 25 - probable fragment	Uncharacterized	NR	0	M	600	0	0	C(3.79)	54	0	ExpAA=0.05 First60=0.02 PredHel=0 Topology=o	600	0						CYT		64.017	6.99			0.598	1.362	0.003	nuc		PF01683; PF01683; PF01683; PF01683; PF01683; PF01683	EB module; EB module; EB module; EB module; EB module; EB module			AgB01_g767_t06-IPRSCAN	IPR006150; IPR006149; IPR000742; IPR009030; IPR009030	Cysteine-richrepeat; EBdomain; EGF-likedomain; Growthfactorreceptorcysteine-richdomainsuperfamily	N	-68.31	-	No					-0.903207	0.00954007
762	AgB01_g768_t01	prion-like_domain-bearing_protein_25	Unknown product	Unknown			M	122	0	0		6	0	ExpAA=0.01 First60=0.00 PredHel=0 Topology=o	122	0						CYT		13.236	9.04			0.73	2.53	0.005	nuc						AgB01_g768_t01-IPRSCAN			N	Too short sequence	-	No					-0.936001	0.00798244
763	AgB01_g769_t02	prion-like_domain-bearing_protein_25	Unknown product - 3 predicted membrane helices	Unknown / membrane			M	189	0	0		2	0	ExpAA=39.87 First60=37.14 PredHel=2 Topology=o15-37i44-63o	189	2	21.7	74.6	3.7		126	CYT		21.274	10.02			0.904	5.744	0.011	end						AgB01_g769_t02-IPRSCAN			N	Too short sequence	-	No					-0.93971	0.007823
764	AgB01_g770_t01	prion-like_domain-bearing_protein_25	prion-like domain-bearing protein 25 - probable fragment	Uncharacterized	NR	0	F	196	0	0	C(3.01)	14	0	ExpAA=0.00 First60=0.00 PredHel=0 Topology=o	196	0						CYT		21.468	4.56			0.872	4.958	0.01	nuc		PF01683	EB module			AgB01_g770_t01-IPRSCAN	IPR006149	EBdomain	N	Too short sequence	-	No					-0.816997	0.0152181
765	AgB01_g771_t02	Endoplasmic_reticulum_mannosyl-oligosaccharide_1,2-alpha-mannosidase	endoplasmic reticulum mannosyl-oligosaccharide -alpha-mannosidase - 2 predicted membrane helices	Post-translational Modifications / membrane	NR	0	M	599	0	0		5	0	ExpAA=22.53 First60=21.30 PredHel=1 Topology=i39-61o	599	1	3.7	89.8	6.5		538	BL/SIG		68.036	6.24			0.55	1.262	0.003	mit	STPRFFR|HV 0.505 *ProP*	PF01532	Glycosyl hydrolase family 47	PTHR11742:SF54	1.5e-227	AgB01_g771_t02-IPRSCAN	IPR012341; IPR001382; IPR036026	Six-hairpinglycosidase-likesuperfamily; Glycosidehydrolasefamily47; Seven-hairpinglycosidases	N	-144.52	-	No					-0.928891	0.00829716
766	AgB01_g772_t06	hypothetical_protein	Unknown product	Unknown			M	431	0	2		2	0	ExpAA=0.00 First60=0.00 PredHel=0 Topology=o	431	0						CYT		48.33	5.15			0.079	0.18	0	nuc	KTSRGRR|PP 0.586 *ProP*					AgB01_g772_t06-IPRSCAN			N	-163.67	-	No					-0.922275	0.00860105
767	AgB01_g773_t01	hypothetical_protein	hypothetical secreted protein precursor	Secreted / Unknown			M	398	0	3		7	0	ExpAA=0.06 First60=0.02 PredHel=0 Topology=o	398	0						SIG	22-23	45.168	5.78	42.554	5.78	0.526	1.19	0.002	nuc	ANERTRR|QV 0.521 *ProP* ; GWIRQKR|HS 0.748 *ProP*					AgB01_g773_t01-IPRSCAN			N	-133.91	-	No					-0.958657	0.00705646
768	AgB01_g774_t02	Poly(U)-specific_endoribonuclease-like_protein	Unknown product	Unknown			M	1310	0	1		31	0	ExpAA=24.07 First60=0.00 PredHel=1 Topology=o1232-1254i	1310	1	1.7	94	4.3		56	CYT		144.338	5.16			0.671	1.837	0.004	end	VSARTKR|QS 0.653 *ProP*	PF02010	REJ domain			AgB01_g774_t02-IPRSCAN	IPR002859	PKD/REJ-likedomain	N	-96.18	-	No					-0.917608	0.00882207
769	AgB01_g775_t02	Poly(U)-specific_endoribonuclease-like_protein	Unknown product - GPI anchored	Unknown / GPI			L	535	0	0		20	0	ExpAA=15.29 First60=4.03 PredHel=0 Topology=o	535	0						BL	39-40	60.169	4.96	55.615	5.08	0.819	1.758	0.004	nuc						AgB01_g775_t02-IPRSCAN			Y	-90.58	-	No					-0.951303	0.00734469
770	AgB01_g776_t02	poly_-specific_endoribonuclease-like_protein	Unknown product	Unknown			M	145	0	0		4	0	ExpAA=4.11 First60=0.06 PredHel=0 Topology=o	145	0						CYT		17.137	11.3			0.59	1.494	0.003	mit						AgB01_g776_t02-IPRSCAN			N	Too short sequence	-	No					-0.977277	0.0063759
771	AgB01_g777_t01	32_kDa_beta-galactoside-binding_lectin	32 kda beta-galactoside-binding lectin	Immunologically Relevant	NR	0	M	296	0	1		0	0	ExpAA=0.00 First60=0.00 PredHel=0 Topology=o	296	0						CYT		34.143	8.55			0.564	1.291	0.003	cyt		PF00337; PF00337	Galactoside-binding lectin; Galactoside-binding lectin	PTHR11346:SF121	4.3e-127	AgB01_g777_t01-IPRSCAN	IPR001079; IPR013320; IPR001079	Galectin,carbohydraterecognitiondomain; ConcanavalinA-likelectin/glucanasedomainsuperfamily	N	-213.2	-	No					-0.993381	0.00584014
772	AgB01_g778_t03	Murinoglobulin-1	Unknown product	Unknown			R	353	0	0		10	0	ExpAA=0.03 First60=0.02 PredHel=0 Topology=o	353	0						CYT		40.535	8.43			0.874	4.958	0.01	mit	TPRRDKR|AV 0.857 *ProP*					AgB01_g778_t03-IPRSCAN			N	-137.93	-	No					-0.94169	0.00773916
773	AgB01_g779_t01	hypothetical_protein	Unknown product	Unknown			V	272	0	0		10	0	ExpAA=1.38 First60=0.03 PredHel=0 Topology=o	272	0						CYT		30.76	5.48			0.369	0.69	0.001	cyt		PF07703	Alpha-2-macroglobulin family N-terminal region			AgB01_g779_t01-IPRSCAN	IPR011625	Alpha-2-macroglobulin,N-terminal2	N	-134.33	-	No					-1.01418	0.00521386
774	AgB01_g780_t02	vasopressin_v1a_receptor	Gonadotropin-releasing hormone receptor - probable fragment - 5 predicted membrane helices	Signal Transduction / membrane	NR	0	L	221	0	0	W(3.24)	7	0	ExpAA=88.04 First60=22.27 PredHel=4 Topology=o29-51i64-86o106-127i147-169o	221	4	39.4	45.7	14.9			CYT		25.492	8.48			0.827	4.014	0.008	end		PF00001	7 transmembrane receptor (rhodopsin family)	PTHR24230:SF121	4.2e-69	AgB01_g780_t02-IPRSCAN	IPR017452; IPR000276; IPR000276	GPCR,rhodopsin-like,7TM; Gprotein-coupledreceptor,rhodopsin-like	N	-109.46	-	No					-0.801743	0.0165238
775	AgB01_g781_t02	cre-gnrr-6_protein	G-protein coupled peptide receptor - neuropeptide signaling pathway - phospholipase C-activating G-protein coupled - 6 predicted membrane helices - GPI anchored	Signal Transduction / membrane / GPI	GO	3e-63	M	335	0	0		5	0	ExpAA=105.11 First60=19.30 PredHel=5 Topology=i30-52o67-86i106-128o172-194i273-295o	335	5	31.9	29.6	38.5			CYT		38.904	9.89			0.986	7.351	0.015	end		PF00001	7 transmembrane receptor (rhodopsin family)	PTHR24230	2.6e-85	AgB01_g781_t02-IPRSCAN	IPR000276; IPR017452; IPR000276	Gprotein-coupledreceptor,rhodopsin-like; GPCR,rhodopsin-like,7TM	Y	-5.81	-	No					-0.922817	0.00857576
776	AgB01_g782_t03	complement_component_c3-like_protein	Unknown product	Unknown			M	46	0	0	C(3.66)	4	0	ExpAA=14.63 First60=14.63 PredHel=0 Topology=o	46	0						BL/SIG		5.456	4.1			0.965	7.351	0.015	gol						AgB01_g782_t03-IPRSCAN			N	Too short sequence	-	No					-1.01094	0.0053069
777	AgB01_g783_t05	Neurogenic_locus_Notch_protein	Golgi lumen - endoplasmic reticulum lumen - cytosol - nucleoplasm - plasma membrane - probable fragment - signalP detected	Protein Export	GO	0	M	1672	0	6	C(4.03)	160	0	ExpAA=19.88 First60=0.13 PredHel=1 Topology=o1126-1145i	1672	1	1.1	67.3	31.5		527	SIG	18-19	182.049	5.31	180.165	5.29	0.244	0.467	0.001	nuc	TYGRIKR|HA 0.725 *ProP* ; QKERSPR|DV 0.601 *ProP*	PF12661; PF07645; PF07645; PF07645; PF07645; PF00066; PF00066; PF00066; PF00008; PF00008; PF00008; PF00008; PF00008; PF00008; PF00008; PF00008; PF00008; PF06816; PF07684; PF12796; PF12796; PF12796	Human growth factor-like EGF; Calcium-binding EGF domain; Calcium-binding EGF domain; Calcium-binding EGF domain; Calcium-binding EGF domain; LNR domain; LNR domain; LNR domain; EGF-like domain; EGF-like domain; EGF-like domain; EGF-like domain; EGF-like domain; EGF-like domain; EGF-like domain; EGF-like domain; EGF-like domain; NOTCH protein; NOTCH protein; Ankyrin repeats (3 copies); Ankyrin re…	PTHR43959:SF5	0	AgB01_g783_t05-IPRSCAN	IPR013032; IPR000742; IPR000152; IPR020683; IPR000800; IPR018097; IPR035993; IPR011656; IPR001881; IPR009030; IPR010660; IPR008297; IPR002110; IPR036770; IPR002110	EGF-like,conservedsite; EGF-likedomain; EGF-typeaspartate/asparaginehydroxylationsite; Ankyrinrepeat-containingdomain; Notchdomain; EGF-likecalcium-binding,conservedsite; Notch-likedomainsuperfamily; Notch,NODPdomain; EGF-likecalcium-bindingdomain; Growthfactorreceptorcysteine-richdomainsuperfamily; Notch,NODdomain; Notch; Ankyrinrepeat; Ankyrinrepeat-containingdomainsuperfamily	N	55.37	-67.5	No					-0.926878	0.0083885
778	AgB01_g784_t01	60s_ribosomal_protein_l5	60S ribosomal protein L5	Protein Synthesis	CDD	0	M	296	0	0		1	0	ExpAA=1.07 First60=0.00 PredHel=0 Topology=o	296	0						CYT		34.25	9.89			0.417	0.86	0.002	nuc		PF14204; PF17144	Ribosomal L18 C-terminal region; Ribosomal large subunit proteins 60S L5, and 50S L18	PTHR23410:SF12	1.7e-143	AgB01_g784_t01-IPRSCAN	IPR005485; IPR025607; IPR005485	RibosomalproteinL5eukaryotic/L18archaeal; RibosomalproteinL5eukaryotic/L18archaeal,C-terminal	N	-255.74	-	No					-0.955319	0.00718587
779	AgB01_g785_t01	Transposon-derived_protein,_partial	Unknown product - signalP detected	Unknown			M	154	0	0		3	0	ExpAA=32.92 First60=17.03 PredHel=1 Topology=o46-68i	154	1	14.3	29.9	55.8		86	SIG	18-19	17.113	10.64	15.038	10.3	0.233	0.446	0.001	end						AgB01_g785_t01-IPRSCAN			N	Too short sequence	-	No					-0.979825	0.00628798
780	AgB01_g786_t01	Surfeit_locus_protein_4	Unknown product - 2 predicted membrane helices	Unknown / membrane			M	97	0	0	F(3.91)	4	0	ExpAA=42.53 First60=30.24 PredHel=2 Topology=i21-40o50-72i	97	2	42.3	10.3	47.4			BL	49-50	11.334	8.86	5.519	6.04	0.554	1.612	0.003	end	VVIYFKR|SV 0.508 *ProP*					AgB01_g786_t01-IPRSCAN			N	Too short sequence	-	No					-1.03038	0.00477285
781	AgB01_g787_t01	Surfeit_locus_protein_4	Unknown product - signalP detected - 2 predicted membrane helices	Unknown / membrane			M	98	0	0	W(3.66)	3	0	ExpAA=45.47 First60=23.11 PredHel=2 Topology=i32-54o69-91i	98	2	44.9	15.3	39.8			SIG	16-17	11.273	7.69	9.477	7.9	0.909	6.083	0.012	end		PF02077	SURF4 family	PTHR23427:SF1	5.5e-28	AgB01_g787_t01-IPRSCAN	IPR002995; IPR002995	Surfeitlocus4	N	Too short sequence	-	No					-1.05391	0.0041975
782	AgB01_g788_t01	Surfeit_locus_protein_4	Unknown product	Unknown			M	109	0.917431	0	X(135.1)	4	0.917431	ExpAA=0.00 First60=0.00 PredHel=0 Topology=o	109	0						CYT		11.889	5.83			0.778	3.182	0.006	nuc						AgB01_g788_t01-IPRSCAN			N	Too short sequence	-	No					-0.906712	0.00936012
783	AgB01_g789_t01	Surfeit_locus_protein_4	Unknown product	Unknown			I	46	0	0	W(3.9)	1	0	ExpAA=0.85 First60=0.85 PredHel=0 Topology=i	46	0						CYT		5.547	10.03			0.724	2.27	0.005	mit		PF02077	SURF4 family	PTHR23427:SF14	1e-15	AgB01_g789_t01-IPRSCAN	IPR002995	Surfeitlocus4	N	Too short sequence	-	No					-1.01826	0.00509913
784	AgB01_g790_t07	dyslexia-associated_protein	Unknown product	Unknown			M	419	0	1		9	0	ExpAA=23.31 First60=0.00 PredHel=1 Topology=o296-318i	419	1	5.3	70.6	24.1		101	CYT		46.895	5.86			0.118	0.249	0	nuc	SRRRRRR|RF 0.547 *ProP* ; RRRRRRR|FR 0.624 *ProP* ; RRRRRFR|RN 0.529 *ProP* ; RRRRFRR|ND 0.632 *ProP*			PTHR10083	1.5e-31	AgB01_g790_t07-IPRSCAN	IPR013783; IPR035986	Immunoglobulin-likefold; PKDdomainsuperfamily	N	-97.37	-	No					-0.91014	0.00918744
785	AgB01_g791_t02	Trafficking_protein_particle_complex_subunit_9	Targeting complex (TRAPP) subunit	Protein Export	KOG	0	M	1275	0	1		33	0	ExpAA=0.02 First60=0.01 PredHel=0 Topology=o	1275	0						CYT		142.53	5.67			0.391	0.745	0.001	cyt		PF08626; PF08626	Transport protein Trs120 or TRAPPC9, TRAPP II complex subunit; Transport protein Trs120 or TRAPPC9, TRAPP II complex subunit	PTHR21512	3.6e-183	AgB01_g791_t02-IPRSCAN	IPR013935; IPR013935	TRAPPIIcomplex,Trs120	N	-138.15	-	No					-0.948787	0.00744596
786	AgB01_g792_t02	Activin_receptor_type-2A	Unknown product - 2 predicted membrane helices	Unknown / membrane			M	178	0	0		3	0	ExpAA=70.14 First60=40.54 PredHel=2 Topology=i9-31o41-63i	178	2	24.7	5.6	69.7		115	BL	28-29	19.471	6.51	16.578	5.77	0.257	0.5	0.001	end		PF00083	Sugar (and other) transporter	PTHR24064	2.1e-25	AgB01_g792_t02-IPRSCAN	IPR036259; IPR005828	MFStransportersuperfamily; Majorfacilitator,sugartransporter-like	N	Too short sequence	-	No					-0.904243	0.00948654
787	AgB01_g793_t01	hypothetical_protein	Unknown product	Unknown			M	98	0	0	C(6.44)H(3.27)V(4.04)	15	0	ExpAA=3.43 First60=2.33 PredHel=0 Topology=o	98	0						BL/SIG		10.952	9.03			0.464	1.026	0.002	nuc						AgB01_g793_t01-IPRSCAN			N	Too short sequence	-	No					-1.03368	0.00468757
788	AgB01_g794_t01	hypothetical_protein	Syntaxin-binding protein 2 - integral component of membrane - vesicle docking involved in exocytosis - probable fragment	Protein Export	GO	8e-20	M	186	0	0	C(8.6)H(4.74)V(3.83)	38	0	ExpAA=0.02 First60=0.01 PredHel=0 Topology=o	186	0						CYT		20.527	8.85			0.165	0.334	0.001	mit				PTHR34000	2.5e-15	AgB01_g794_t01-IPRSCAN			N	Too short sequence	-	No					-0.932124	0.00815256
789	AgB01_g795_t01	Uncharacterized_protein_U88	Syntaxin-binding protein 2 - integral component of membrane - vesicle docking involved in exocytosis - probable fragment	Protein Export	GO	5e-18	S	202	0	0	C(8.75)V(3.06)	42	0	ExpAA=18.73 First60=6.72 PredHel=0 Topology=o	202	0						BL/ANC		21.723	8.13			0.925	6.51	0.013	mit						AgB01_g795_t01-IPRSCAN			N	-138.33	-	No					-1.02137	0.00501325
790	AgB01_g796_t01	hypothetical_protein	Unknown product	Unknown			M	105	0	0		0	0	ExpAA=0.00 First60=0.00 PredHel=0 Topology=o	105	0						CYT		11.922	9.05			0.6	1.964	0.004	nuc	YEARSER|VV 0.540 *ProP* ; RSNRGVR|SK 0.583 *ProP*					AgB01_g796_t01-IPRSCAN			N	Too short sequence	-	No					-0.931256	0.00819113
791	AgB01_g797_t04	RdRP3	rna-dependent rna polymerase 3 - probable fragment	Transcription Machinery	NR	0	M	753	0	2		13	0	ExpAA=0.25 First60=0.00 PredHel=0 Topology=o	753	0						CYT		86.306	5.79			0.502	1.003	0.002	cyt	LVGRLYR|KV 0.536 *ProP*	PF05183; PF05183	RNA dependent RNA polymerase; RNA dependent RNA polymerase	PTHR23079:SF1	1e-153	AgB01_g797_t04-IPRSCAN	IPR007855; IPR007855	RNA-dependentRNApolymerase,eukaryotic-type	N	-141.1	-	No					-0.958969	0.00704448
792	AgB01_g798_t02	rna-dependent_rna_polymerase_3	Unknown product	Unknown			M	217	0	0		7	0	ExpAA=0.00 First60=0.00 PredHel=0 Topology=o	217	0						CYT		24.081	5.03			0.9	5.872	0.012	nuc						AgB01_g798_t02-IPRSCAN			N	-199.9	-	No					-0.907362	0.00932717
793	AgB01_g799_t01	Dual_specificity_mitogen-activated_protein_kinase_kinase_7	dual specificity mitogen-activated protein kinase kinase 7	Signal Transduction	NR	0	M	407	0	1		11	0	ExpAA=0.00 First60=0.00 PredHel=0 Topology=o	407	0						CYT		45.9	9			0.551	1.18	0.002	nuc		PF00069	Protein kinase domain	PTHR24361	1.7e-114	AgB01_g799_t01-IPRSCAN	IPR011009; IPR000719; IPR008271	Proteinkinase-likedomainsuperfamily; Proteinkinasedomain; Serine/threonine-proteinkinase,activesite	N	-142.37	-	No	197.2	5.4e-56	0.771025	STE/STE7/MEK7 protein kinase	-0.987364	0.00603488
794	AgB01_g800_t02	hypothetical_protein	Unknown product	Unknown			M	256	0	0		11	0	ExpAA=0.00 First60=0.00 PredHel=0 Topology=o	256	0						CYT		27.781	5.95			0.335	0.624	0.001	nuc						AgB01_g800_t02-IPRSCAN	IPR008962; IPR013783	PapD-likesuperfamily; Immunoglobulin-likefold	N	-182.12	-	No					-0.980475	0.00626576
795	AgB01_g801_t01	intracellular_protein_transport_protein_uso1	myosin heavy chain muscle isoform X35 - probable fragment	Cytoskeletal	REFSEQ-INVERTEBRATE	3e-24	M	801	0	0		10	0	ExpAA=0.00 First60=0.00 PredHel=0 Topology=o	801	0						CYT		92.483	5.17			0.431	0.825	0.002	nuc	LVSRLER|YT 0.560 *ProP*			PTHR43939	7.6e-14	AgB01_g801_t01-IPRSCAN			N	-220.08	-	No					-0.95405	0.00723567
796	AgB01_g802_t01	hypothetical_protein	hypothetical secreted protein precursor	Secreted / Unknown			M	96	0	0		0	0	ExpAA=11.01 First60=11.01 PredHel=0 Topology=o	96	0						SIG	20-21	11.133	9.52	8.85	9.86	0.923	0.521	0.001	nuc						AgB01_g802_t01-IPRSCAN			N	Too short sequence	-	No					-0.956775	0.00712912
797	AgB01_g803_t02	hypothetical_protein	Unknown product	Unknown			M	155	0	0		1	0	ExpAA=0.00 First60=0.00 PredHel=0 Topology=o	155	0						CYT		17.924	6.37			0.925	6.635	0.013	nuc						AgB01_g803_t02-IPRSCAN			N	Too short sequence	-	No					-1.00382	0.00551711
798	AgB01_g804_t04	Cytokinesis_defective_protein_7	hypothetical protein ASU_10088	Uncharacterized	NR	0	D	220	0	2		2	0	ExpAA=0.01 First60=0.01 PredHel=0 Topology=o	220	0						CYT		25.721	5.12			0.468	2.097	0.004	cyt		PF00651	BTB/POZ domain	PTHR26379:SF137	1.9e-15	AgB01_g804_t04-IPRSCAN	IPR000210; IPR011333; IPR000210	BTB/POZdomain; SKP1/BTB/POZdomainsuperfamily	N	-259.56	-	No					-0.979156	0.00631093
799	AgB01_g805_t01	hypothetical_protein	Unknown product	Unknown			M	130	0	1		1	0	ExpAA=21.10 First60=21.10 PredHel=1 Topology=o28-47i	130	1	14.6	21.5	63.8		83	BL/ANC		15.476	9.01			0.258	0.514	0.001	nuc						AgB01_g805_t01-IPRSCAN			N	Too short sequence	-	No					-1.01191	0.00527892
800	AgB01_g806_t03	Leucine-rich_repeat-containing_protein_59	leucine rich repeat containing 59 - membrane - intracellular membrane-bounded organelle - endoplasmic reticulum - endoplasmic reticulum membrane - - probable fragment	Post-translation Modification	GO	6e-42	M	169	0	0		3	0	ExpAA=0.00 First60=0.00 PredHel=0 Topology=o	169	0						CYT		19.325	5.54			0.788	3.252	0.007	cyt		PF13855	Leucine rich repeat	PTHR44462	6.2e-65	AgB01_g806_t03-IPRSCAN	IPR003591; IPR001611; IPR032675; IPR001611	Leucine-richrepeat,typicalsubtype; Leucine-richrepeat; Leucine-richrepeatdomainsuperfamily	N	Too short sequence	-	No					-0.977606	0.00636449
801	AgB01_g807_t01	Leucine-rich_repeat-containing_protein_59	Unknown product	Unknown			R	189	0	1		6	0	ExpAA=0.01 First60=0.00 PredHel=0 Topology=o	189	0						CYT		20.876	6.48			0.89	5.407	0.011	nuc						AgB01_g807_t01-IPRSCAN			N	Too short sequence	-	No					-0.858385	0.0121658
802	AgB01_g808_t02	hypothetical_protein	Unknown product	Unknown			M	310	0	0		7	0	ExpAA=0.42 First60=0.17 PredHel=0 Topology=o	310	0						CYT		35.6	8.1			0.456	0.888	0.002	cyt						AgB01_g808_t02-IPRSCAN	IPR000210	BTB/POZdomain	N	-137.1	-	No					-0.935963	0.00798408
803	AgB01_g809_t01	G-protein_coupled_receptor,_partial	G-protein coupled receptor AH9.4 - 7 predicted membrane helices	Signal Transduction / membrane	NR	0	M	391	0	1		9	0	ExpAA=157.13 First60=12.34 PredHel=7 Topology=o48-70i91-113o128-150i176-198o218-240i282-304o324-346i	391	7	39.4	26.3	34.3			CYT		44.543	9.32			0.683	1.947	0.004	end	IKQRPTR|SL 0.508 *ProP*	PF00001	7 transmembrane receptor (rhodopsin family)	PTHR24224	5.4e-58	AgB01_g809_t01-IPRSCAN	IPR000276; IPR017452	Gprotein-coupledreceptor,rhodopsin-like; GPCR,rhodopsin-like,7TM	N	22.01	27.06	GPCR					-0.896008	0.0099204
804	AgB01_g810_t02	long-chain_fatty_acid_transport_protein_4	long-chain fatty acid transport protein 4 - probable fragment - signalP detected	Lipid Metabolism	NR	0	M	436	0	0		11	0	ExpAA=12.97 First60=12.76 PredHel=1 Topology=i7-24o	436	1	3.9	94.5	1.6		412	SIG	22-23	48.562	6.11	46.248	6.25	0.569	1.272	0.003	mit		PF00501	AMP-binding enzyme	PTHR43107	8.7e-226	AgB01_g810_t02-IPRSCAN	IPR020845; IPR000873	AMP-binding,conservedsite; AMP-dependentsynthetase/ligase	N	-126.47	-	No					-0.914129	0.00899044
805	AgB01_g811_t01	hypothetical_protein	Unknown product - 2 predicted membrane helices	Unknown / membrane			L	99	0	0		4	0	ExpAA=24.52 First60=2.20 PredHel=1 Topology=i68-90o	99	1	22.2	9.1	68.7		9	CYT		11.676	9.24			0.438	0.983	0.002	cyt						AgB01_g811_t01-IPRSCAN			N	Too short sequence	-	No					-0.915793	0.00890953
806	AgB01_g812_t05	Corepressor_interacting_with_RBPJ_1	corepressor interacting with RBPJ - probable fragment	Signal Transduction	GO	3e-11	M	161	0	0		1	0	ExpAA=0.03 First60=0.00 PredHel=0 Topology=o	161	0						CYT		18.66	10.13			0.83	4.287	0.009	nuc						AgB01_g812_t05-IPRSCAN			N	Too short sequence	-	No					-0.986615	0.00605957
807	AgB01_g813_t01	ubiquitin_carboxyl-terminal_hydrolase_16	ubiquitin carboxyl-terminal hydrolase 16	Proteasome	NR	0	M	710	0	0		25	0	ExpAA=0.03 First60=0.00 PredHel=0 Topology=o	710	0						CYT		78.01	7.46			0.363	0.672	0.001	nuc		PF00443; PF02148	Ubiquitin carboxyl-terminal hydrolase; Zn-finger in ubiquitin-hydrolases and other protein	PTHR44182	1.6e-94	AgB01_g813_t01-IPRSCAN	IPR001394; IPR028889; IPR018200; IPR013083; IPR001607; IPR001607	PeptidaseC19,ubiquitincarboxyl-terminalhydrolase; Ubiquitinspecificproteasedomain; Ubiquitinspecificprotease,conservedsite; Zincfinger,RING/FYVE/PHD-type; Zincfinger,UBP-type	N	-143.94	-	No					-0.97324	0.00651766
808	AgB01_g814_t01	ubiquitin_carboxyl-terminal_hydrolase_16	Unknown product	Unknown			M	139	0	0		8	0	ExpAA=0.37 First60=0.00 PredHel=0 Topology=o	139	0						CYT		14.885	8.64			0.75	2.648	0.005	nuc		PF02148	Zn-finger in ubiquitin-hydrolases and other protein			AgB01_g814_t01-IPRSCAN	IPR013083; IPR001607; IPR001607	Zincfinger,RING/FYVE/PHD-type; Zincfinger,UBP-type	N	Too short sequence	-	No					-0.930973	0.00820377
809	AgB01_g815_t04	Putative_RNA-directed_DNA_polymerase_from_transposon_X-element_(Fragment)	Unknown product - 2 predicted membrane helices	Unknown / membrane			M	88	0	0	F(3.23)	3	0	ExpAA=42.24 First60=35.14 PredHel=2 Topology=i21-40o44-66i	88	2	46.6	4.5	48.9			ANC		10.204	7.78	5.981	4.89	0.222	0.472	0.001	mit						AgB01_g815_t04-IPRSCAN			N	Too short sequence	-	No					-1.01975	0.005058
810	AgB01_g816_t01	IWS1-like_protein	regulation of histone H3-K36 trimethylation - regulation of mRNA processing - regulation of DNA-templated transcription - probable fragment	Nuclear Regulation	GO	5e-35	T	383	0	0		2	0	ExpAA=0.44 First60=0.00 PredHel=0 Topology=o	383	0						CYT		42.96	4.58			0.83	3.894	0.008	nuc	KKQRRRR|KD 0.623 *ProP*			PTHR22908	4.4e-18	AgB01_g816_t01-IPRSCAN	IPR035441	TFIIS/LEDGFdomainsuperfamily	N	-248.44	-	No					-0.919294	0.00874157
811	AgB01_g817_t01	hypothetical_protein	Unknown product	Unknown			M	188	0	0		11	0	ExpAA=7.47 First60=7.47 PredHel=0 Topology=o	188	0						BL	42-43	21.719	8.48	16.961	8.35	0.831	3.893	0.008	exc						AgB01_g817_t01-IPRSCAN			N	Too short sequence	-	No					-0.945608	0.00757589
812	AgB01_g818_t03	Isoaspartyl_peptidase	thioredoxin-like protein 4a - probable fragment	Detoxification / Oxidation	NR	0	M	307	0	0		7	0	ExpAA=0.50 First60=0.47 PredHel=0 Topology=o	307	0						CYT		32.103	7.04			0.552	1.208	0.002	cyt		PF01112	Asparaginase	PTHR10188	2.6e-82	AgB01_g818_t03-IPRSCAN	IPR000246; IPR029055	PeptidaseT2,asparaginase2; Nucleophileaminohydrolases,N-terminal	N	-145.45	-	No					-0.971208	0.00659024
813	AgB01_g819_t03	Transcription_elongation_factor_B_polypeptide_3	Organic cation transporter protein - 10 predicted membrane helices	Transporters / membrane	NR	0	M	494	0	2		14	0	ExpAA=221.07 First60=19.07 PredHel=10 Topology=i20-42o81-103i110-132o136-158i170-192o196-218i303-325o335-357i364-386o455-477i	494	10	44.5	25.5	30			CYT		54.038	8.34			0.431	0.889	0.002	end		PF00083	Sugar (and other) transporter	PTHR24064	1.8e-75	AgB01_g819_t03-IPRSCAN	IPR036259; IPR005828; IPR005829; IPR020846; IPR020846	MFStransportersuperfamily; Majorfacilitator,sugartransporter-like; Sugartransporter,conservedsite; Majorfacilitatorsuperfamilydomain	N	-37.06	-	No					-0.95913	0.0070383
814	AgB01_g820_t01	hypothetical_protein	negative regulation of cAMP-dependent protein kinase - negative regulation of protein kinase - cytoplasm - nucleus - cAMP-dependent protein kinase	Signal Transduction	GO	6e-07	M	78	0	1		1	0	ExpAA=0.00 First60=0.00 PredHel=0 Topology=o	78	0						CYT		8.527	4.68			0.559	1.356	0.003	nuc		PF02827	cAMP-dependent protein kinase inhibitor	PTHR15416	4.2e-12	AgB01_g820_t01-IPRSCAN	IPR004171; IPR004171	cAMP-dependentproteinkinaseinhibitor	N	Too short sequence	-	No					-0.922426	0.00859402
815	AgB01_g821_t01	hypothetical_protein	Unknown product	Unknown			M	111	0	0		7	0	ExpAA=0.00 First60=0.00 PredHel=0 Topology=o	111	0						CYT		12.415	9.11			0.862	4.54	0.009	nuc						AgB01_g821_t01-IPRSCAN			N	Too short sequence	-	No					-1.02605	0.00488699
816	AgB01_g822_t05	Lysine-specific_demethylase_8	Lysine-specific demethylase 8	Transcription Machinery	NR	0	M	599	0	2		21	0	ExpAA=0.00 First60=0.00 PredHel=0 Topology=o	599	0						CYT		68.082	5.34			0.416	0.803	0.002	cyt		PF13621; PF13673	Cupin-like domain; Acetyltransferase (GNAT) domain	PTHR12461:SF38	1.6e-67	AgB01_g822_t05-IPRSCAN	IPR016181; IPR003347; IPR000182; IPR000182	Acyl-CoAN-acyltransferase; JmjCdomain; GNATdomain	N	-142.64	-	No					-0.930595	0.00822063
817	AgB01_g823_t03	hypothetical_protein	Unknown product - signalP detected - 16 predicted membrane helices - GPI anchored	Unknown / membrane / GPI			M	620	0	2		28	0	ExpAA=338.41 First60=28.30 PredHel=16 Topology=i13-35o57-79i86-108o118-140i161-180o195-217i238-260o270-292i333-355o360-382i389-411o431-450i479-501o511-533i540-562o592-614i	620	16	55.8	19.7	24.5			SIG	35-36	70.298	8.69	66.234	8.63	0.7	2.295	0.005	end	HLYRKRR|IA 0.558 *ProP*					AgB01_g823_t03-IPRSCAN			Y	-56.9	-	No					-0.952161	0.00731048
818	AgB01_g824_t01	beta-hexosaminidase_a	Beta-N-acetylhexosaminidase - signalP detected	Carbohydrate Metabolism	KOG	0	M	545	0	3	W(3.12)	10	0	ExpAA=1.07 First60=1.06 PredHel=0 Topology=o	545	0						SIG	22-23	62.51	5.47	59.962	5.38	0.634	1.581	0.003	cyt		PF00728; PF14845	Glycosyl hydrolase family 20, catalytic domain; beta-acetyl hexosaminidase like	PTHR22600:SF20	2.6e-164	AgB01_g824_t01-IPRSCAN	IPR025705; IPR015883; IPR029018; IPR029019; IPR017853; IPR029018	Beta-hexosaminidase; Glycosidehydrolasefamily20,catalyticdomain; Beta-hexosaminidase-like,domain2; Beta-hexosaminidase,eukaryotictype,N-terminal; Glycosidehydrolasesuperfamily	N	-156.09	-	No					-0.977476	0.00636897
819	AgB01_g825_t01	beta-hexosaminidase_a	Unknown product	Unknown			M	67	0	0		0	0	ExpAA=0.00 First60=0.00 PredHel=0 Topology=i	67	0						CYT		7.914	6.91			0.799	0.676	0.001	nuc						AgB01_g825_t01-IPRSCAN			N	Too short sequence	-	No					-1.01814	0.00510257
820	AgB01_g826_t01	hypothetical_protein	Unknown product	Unknown			M	86	0	1	W(3.13)	5	0	ExpAA=0.01 First60=0.00 PredHel=0 Topology=o	86	0						CYT		10.147	11.26			0.7	2.145	0.004	nuc	NGRRDRR|SD 0.671 *ProP* ; DEERRKR|FS 0.603 *ProP*					AgB01_g826_t01-IPRSCAN			N	Too short sequence	-	No					-1.02277	0.0049753
821	AgB01_g827_t01	Carbonic_anhydrase_5	carbonic anhydrase 5	Transporters	NR	0	M	319	0	1		2	0	ExpAA=18.61 First60=0.00 PredHel=1 Topology=o297-316i	319	1	6	93.1	0.9	1	3	CYT		35.712	6.39			0.53	1.393	0.003	nuc		PF00194	Eukaryotic-type carbonic anhydrase	PTHR18952	2.3e-64	AgB01_g827_t01-IPRSCAN	IPR036398; IPR001148; IPR023561; IPR018338; IPR001148	Alphacarbonicanhydrasesuperfamily; Alphacarbonicanhydrase; Carbonicanhydrase,alpha-class; Carbonicanhydrase,alpha-class,conservedsite	N	-134.04	-	No					-0.975882	0.00642455
822	AgB01_g828_t04	Protein-associating_with_the_carboxyl-terminal_domain_of_ezrin	protein kinase	Signal Transduction	NR	1e-85	M	721	0	0		9	0	ExpAA=0.96 First60=0.00 PredHel=0 Topology=o	721	0						CYT		81.576	5.71			0.308	0.574	0.001	cyt	EANRIAR|SR 0.518 *ProP*	PF00069	Protein kinase domain	PTHR12984:SF15	1.8e-116	AgB01_g828_t04-IPRSCAN	IPR016024; IPR011009; IPR000719; IPR011989	Armadillo-typefold; Proteinkinase-likedomainsuperfamily; Proteinkinasedomain; Armadillo-likehelical	N	-145.36	-	No	-96.8	0.044	0.573076	Other/SCY1 protein kinase	-0.95305	0.00727517
823	AgB01_g829_t06	hypothetical_protein	Unknown product - GPI anchored	Unknown / GPI			T	64	0	0	C(3.29)	5	0	ExpAA=8.51 First60=8.05 PredHel=0 Topology=o	64	0						CYT		7.297	9.01			0.913	6.176	0.012	nuc						AgB01_g829_t06-IPRSCAN			Y	Too short sequence	-	No					-0.809737	0.0158264
824	AgB01_g830_t01	hypothetical_protein	Unknown product	Unknown			M	102	0	0	M(3.07)	1	0	ExpAA=0.34 First60=0.34 PredHel=0 Topology=o	102	0						BL/SIG		11.911	9.04			0.853	4.312	0.009	nuc						AgB01_g830_t01-IPRSCAN			N	Too short sequence	-	No					-1.00968	0.00534355
825	AgB01_g831_t04	hypothetical_protein	Unknown product	Unknown			M	176	0	1		3	0	ExpAA=0.00 First60=0.00 PredHel=0 Topology=o	176	0						CYT		19.554	8.73			0.707	2.213	0.004	nuc						AgB01_g831_t04-IPRSCAN			N	Too short sequence	-	No					-0.999178	0.00565846
826	AgB01_g832_t01	ubiquitin_carboxyl-terminal_hydrolase_7	ubiquitin carboxyl-terminal hydrolase 7 - probable fragment	Proteasome	NR	4e-96	M	337	0	1		5	0	ExpAA=0.00 First60=0.00 PredHel=0 Topology=o	337	0						CYT		38.649	5.62			0.796	3.32	0.007	nuc						AgB01_g832_t01-IPRSCAN			N	-266.79	-	No					-0.942051	0.00772397
827	AgB01_g833_t04	hypothetical_protein	Unknown product	Unknown			M	187	0	0		2	0	ExpAA=23.04 First60=0.01 PredHel=1 Topology=o119-141i	187	1	11.8	63.6	24.6		46	CYT		20.681	4.6			0.291	0.569	0.001	nuc						AgB01_g833_t04-IPRSCAN			N	Too short sequence	-	No					-0.964505	0.00683529
828	AgB01_g834_t04	Solute_carrier_family_2,_facilitated_glucose_transporter_member_5	solute carrier family facilitated glucose transporter member 5 - 10 predicted membrane helices	Transporters / membrane	NR	0	M	573	0	0		11	0	ExpAA=213.04 First60=0.01 PredHel=9 Topology=i156-178o188-207i214-236o246-268i399-421o431-453i466-488o503-522i529-551o	573	9	33.5	11.7	54.8			CYT		62.599	4.79			0.683	2.488	0.005	end		PF00083	Sugar (and other) transporter	PTHR23503	9.7e-107	AgB01_g834_t04-IPRSCAN	IPR020846; IPR003663; IPR036259; IPR005829; IPR005828	Majorfacilitatorsuperfamilydomain; Sugar/inositoltransporter; MFStransportersuperfamily; Sugartransporter,conservedsite; Majorfacilitator,sugartransporter-like	N	-46.59	-	No					-0.931608	0.00817549
829	AgB01_g835_t01	Solute_carrier_family_2,_facilitated_glucose_transporter_member_5	Unknown product	Unknown			M	145	0	0		4	0	ExpAA=8.13 First60=1.12 PredHel=0 Topology=o	145	0						CYT		16.542	9.85			0.179	0.358	0.001	cyt						AgB01_g835_t01-IPRSCAN			N	Too short sequence	-	No					-0.9663	0.00676878
830	AgB01_g836_t01	hypothetical_protein	Unknown product	Unknown			M	86	0	0	C(3.92)	8	0	ExpAA=18.42 First60=11.35 PredHel=0 Topology=o	86	0						CYT		9.938	8.7			0.946	7.21	0.014	mit						AgB01_g836_t01-IPRSCAN			N	Too short sequence	-	No					-1.03472	0.00466106
831	AgB02_g001_t09	FACT_complex_subunit_SSRP1-A	Unknown product - signalP detected - 2 predicted membrane helices	Unknown / membrane			M	105	0	0	F(4.28)	4	0	ExpAA=40.72 First60=12.94 PredHel=1 Topology=i59-81o	105	1	21	22.9	56.2		24	SIG	26-27	12.208	9.79	9.203	9.24	0.492	1.152	0.002	end						AgB02_g001_t09-IPRSCAN			N	Too short sequence	-	No					-0.867046	0.011608
832	AgB02_g002_t02	FACT_complex_subunit_SSRP1-A	Unknown product	Unknown			M	106	0	1	P(3.55)	1	0	ExpAA=0.00 First60=0.00 PredHel=0 Topology=o	106	0						CYT		11.974	12.13			0.542	1.208	0.002	nuc						AgB02_g002_t02-IPRSCAN			N	Too short sequence	-	No					-0.978877	0.00632056
833	AgB02_g003_t01	hypothetical_protein	Unknown product	Unknown			M	91	0	1		0	0	ExpAA=0.00 First60=0.00 PredHel=0 Topology=o	91	0						CYT		10.192	8.07			0.863	4.743	0.009	mit	GVKREKR|SR 0.634 *ProP*					AgB02_g003_t01-IPRSCAN			N	Too short sequence	-	No					-0.877131	0.0109904
834	AgB02_g004_t01	cre-edc-3_protein	cre-edc-3 protein - probable fragment	Uncharacterized	NR	8e-89	M	186	0	0		6	0	ExpAA=0.02 First60=0.02 PredHel=0 Topology=o	186	0						CYT		19.545	9.57			0.739	2.488	0.005	nuc				PTHR13612	7.3e-16	AgB02_g004_t01-IPRSCAN			N	Too short sequence	-	No					-0.848509	0.0128341
835	AgB02_g005_t01	hypothetical_protein	Unknown product	Unknown			M	99	0	1		3	0	ExpAA=0.00 First60=0.00 PredHel=0 Topology=i	99	0						CYT		11.331	10.44			0.778	3.387	0.007	mit						AgB02_g005_t01-IPRSCAN			N	Too short sequence	-	No					-1.03078	0.00476234
836	AgB02_g006_t02	hypothetical_protein	hypothetical secreted protein precursor - GPI anchored	Secreted / Unknown / GPI			M	217	0	3		5	0	ExpAA=6.61 First60=6.54 PredHel=0 Topology=o	217	0						SIG	24-25	22.638	4.3	20.058	4.3	0.944	6.894	0.014	nuc						AgB02_g006_t02-IPRSCAN			Y	-140.73	-	No					-0.884346	0.0105686
837	AgB02_g007_t01	Protein_capicua	nucleus - DNA binding - negative regulation of transcription by RNA polymerase II - probable fragment	Transcription Machinery	GO	7e-66	M	919	0	4		10	0	ExpAA=0.00 First60=0.00 PredHel=0 Topology=o	919	0						CYT		100.567	7.02			0.192	0.382	0.001	nuc	VPHLQKR|SL 0.604 *ProP* ; YPNRDNR|TV 0.701 *ProP*	PF00505	HMG (high mobility group) box	PTHR13059:SF13	2.3e-106	AgB02_g007_t01-IPRSCAN	IPR009071; IPR036910; IPR009071	Highmobilitygroupboxdomain; Highmobilitygroupboxdomainsuperfamily	N	-85.37	-	No					-0.953314	0.00726474
838	AgB02_g008_t01	Protein_capicua	protein capicua-like protein	Uncharacterized	NR	0	M	777	0	3		13	0	ExpAA=0.00 First60=0.00 PredHel=0 Topology=o	777	0						CYT		83.784	5.16			0.26	0.491	0.001	nuc		PF16090	Domain of unknown function (DUF4819)			AgB02_g008_t01-IPRSCAN	IPR032147	DomainofunknownfunctionDUF4819	N	-84.29	-	No					-0.859149	0.0121155
839	AgB02_g009_t01	Dual_specificity_mitogen-activated_protein_kinase_kinase_6	dual specificity mitogen-activated protein kinase kinase 6	Signal Transduction	NR	0	M	360	0	0		9	0	ExpAA=0.03 First60=0.00 PredHel=0 Topology=o	360	0						CYT		40.805	6.76			0.429	0.817	0.002	mit		PF00069	Protein kinase domain	PTHR24361	6.1e-116	AgB02_g009_t01-IPRSCAN	IPR000719; IPR011009; IPR017441; IPR008271	Proteinkinasedomain; Proteinkinase-likedomainsuperfamily; Proteinkinase,ATPbindingsite; Serine/threonine-proteinkinase,activesite	N	-167.79	-	No	204.6	3.2e-58	0.772964	STE/STE7/MEK3 protein kinase	-0.962642	0.00690499
840	AgB02_g010_t03	hypothetical_protein	Unknown product	Unknown			M	215	0	0		2	0	ExpAA=0.00 First60=0.00 PredHel=0 Topology=o	215	0						CYT		23.814	4.28			0.68	1.878	0.004	nuc						AgB02_g010_t03-IPRSCAN			N	-199.36	-	No					-0.944258	0.00763179
841	AgB02_g011_t01	hypothetical_protein	Unknown product	Unknown			M	155	0	0		6	0	ExpAA=0.04 First60=0.02 PredHel=0 Topology=o	155	0						CYT		18.117	11.1			0.574	1.527	0.003	mit						AgB02_g011_t01-IPRSCAN			N	Too short sequence	-	No					-0.869066	0.0114816
842	AgB02_g012_t01	hypothetical_protein	Unknown product	Unknown			M	118	0	1		5	0	ExpAA=0.00 First60=0.00 PredHel=0 Topology=o	118	0						CYT		13.202	8.93			0.315	1.186	0.002	nuc						AgB02_g012_t01-IPRSCAN			N	Too short sequence	-	No					-0.875826	0.0110685
843	AgB02_g013_t01	hypothetical_protein	hypothetical secreted protein precursor	Secreted / Unknown			M	109	0	1	F(3.04)	4	0	ExpAA=22.11 First60=22.07 PredHel=1 Topology=i12-34o	109	1	20.2	68.8	11		75	SIG	26-27	12.135	4.17	9.224	3.99	0.901	5.607	0.011	mit						AgB02_g013_t01-IPRSCAN			N	Too short sequence	-	No					-1.006	0.00545196
844	AgB02_g014_t01	putative_phosphoribosylformylglycinamidine_synthase	Phosphoribosylformylglycinamidine synthase - probable fragment	Nuclear Metabolism	KOG	0	F	943	0	3		21	0	ExpAA=0.17 First60=0.00 PredHel=0 Topology=o	943	0						CYT		102.853	5.87			0.484	0.781	0.002	cyt		PF02769; PF02769	AIR synthase related protein, C-terminal domain; AIR synthase related protein, C-terminal domain	PTHR10099:SF1	0	AgB02_g014_t01-IPRSCAN	IPR036676; IPR036921; IPR036604; IPR010918; IPR036676	PurM-like,C-terminaldomainsuperfamily; PurM-like,N-terminaldomainsuperfamily; PhosphoribosylformylglycinamidinesynthasesubunitPurS-likesuperfamily; PurM-like,C-terminaldomain	N	-175.9	-	No					-0.928687	0.00830639
845	AgB02_g015_t02	Retrotransposable_element_Tf2_155_kDa_protein_type_1	Unknown product	Unknown			M	75	0	1		3	0	ExpAA=0.07 First60=0.07 PredHel=0 Topology=o	75	0						CYT		8.03	8.53			0.739	1.842	0.004	cyt						AgB02_g015_t02-IPRSCAN			N	Too short sequence	-	No					-1.00351	0.00552622
846	AgB02_g016_t01	hypothetical_protein	hypothetical secreted protein precursor	Secreted / Unknown			S	115	0	0	C(3.3)	9	0	ExpAA=0.13 First60=0.05 PredHel=0 Topology=o	115	0						SIG	18-19	12.874	9.11	10.864	9.22	0.47	0.941	0.002	mit						AgB02_g016_t01-IPRSCAN			N	Too short sequence	-	No					-0.60377	0.0473942
847	AgB02_g017_t01	Transient_receptor_potential_cation_channel_subfamily_M_member_6	Transient receptor potential cation channel trpm - probable fragment	Signal Transduction	NR	0	M	613	0	1		16	0	ExpAA=0.02 First60=0.00 PredHel=0 Topology=o	613	0						CYT		69.166	8.21			0.241	0.458	0.001	cyt				PTHR13800:SF1	2.2e-72	AgB02_g017_t01-IPRSCAN			N	-151.92	-	No					-0.976741	0.00639454
848	AgB02_g018_t01	hypothetical_protein	Unknown product - 2 predicted membrane helices	Unknown / membrane			S	147	0	1		7	0	ExpAA=21.46 First60=21.46 PredHel=1 Topology=i35-57o	147	1	15	61.2	23.8		90	BL/ANC		16.848	8.71			0.916	6.022	0.012	mit	KMMRMKR|CC 0.602 *ProP*	PF05649	Peptidase family M13			AgB02_g018_t01-IPRSCAN	IPR024079; IPR008753	Metallopeptidase,catalyticdomainsuperfamily; PeptidaseM13,N-terminaldomain	N	Too short sequence	-	No					-0.860799	0.0120077
849	AgB02_g019_t02	neprilysin-1	Peptidase family M13 - probable fragment	Post-translational Modifications / protease	PFAM	1e-40	M	257	0	0		1	0	ExpAA=19.73 First60=0.18 PredHel=1 Topology=o234-256i	257	1	8.6	91.1	0.4	1	1	CYT		30.094	6.6			0.568	1.278	0.003	cyt		PF05649	Peptidase family M13	PTHR11733:SF133	3.2e-27	AgB02_g019_t02-IPRSCAN	IPR024079; IPR008753; IPR000718	Metallopeptidase,catalyticdomainsuperfamily; PeptidaseM13,N-terminaldomain; PeptidaseM13	N	-119.14	-	No					-1.01504	0.00518945
850	AgB02_g020_t01	neprilysin-2	Unknown product	Unknown			M	296	0	0		8	0	ExpAA=0.02 First60=0.00 PredHel=0 Topology=o	296	0						CYT		33.953	9.52			0.416	0.805	0.002	cyt						AgB02_g020_t01-IPRSCAN			N	-126.85	-	No					-0.948064	0.0074753
851	AgB02_g021_t02	hypothetical_protein	Unknown product	Unknown			M	216	0	0		5	0	ExpAA=0.00 First60=0.00 PredHel=0 Topology=o	216	0						CYT		23.666	4.67			0.927	6.585	0.013	nuc						AgB02_g021_t02-IPRSCAN			N	-235.42	-	No					-0.847457	0.0129074
852	AgB02_g022_t01	hypothetical_protein	Unknown product	Unknown			M	119	0	1		0	0	ExpAA=0.00 First60=0.00 PredHel=0 Topology=o	119	0						CYT		13.3	8.01			0.725	2.49	0.005	nuc						AgB02_g022_t01-IPRSCAN			N	Too short sequence	-	No					-0.935652	0.00799761
853	AgB02_g023_t01	hypothetical_protein	Unknown product	Unknown			T	99	0	0		1	0	ExpAA=0.04 First60=0.04 PredHel=0 Topology=o	99	0						CYT		11.871	10.17			0.731	2.446	0.005	cyt						AgB02_g023_t01-IPRSCAN			N	Too short sequence	-	No					-1.01689	0.00513736
854	AgB02_g024_t02	hypothetical_protein	integral component of membrane - membrane - G-protein coupled receptor signaling pathway - G-protein coupled receptor - 5 predicted membrane helices	Signal Transduction / membrane	GO	1e-79	M	266	0	0		6	0	ExpAA=113.15 First60=22.93 PredHel=5 Topology=o30-52i65-87o112-134i154-176o210-232i	266	5	41.4	33.5	25.2			CYT		30.454	9.93			0.071	0.162	0	end	YRRRKRK|QA 0.541 *ProP*	PF00001	7 transmembrane receptor (rhodopsin family)	PTHR24243:SF193	1.9e-75	AgB02_g024_t02-IPRSCAN	IPR000276; IPR017452	Gprotein-coupledreceptor,rhodopsin-like; GPCR,rhodopsin-like,7TM	N	-46.55	-	No					-1.00071	0.0056113
855	AgB02_g025_t01	immunoglobulin_i-set_domain_containing_protein	immunoglobulin i-set domain containing protein - probable fragment	Immunologically Relevant	NR	1e-94	M	199	0	0		3	0	ExpAA=0.00 First60=0.00 PredHel=0 Topology=o	199	0						CYT		22.373	6.46			0.72	2.425	0.005	nuc		PF07679	Immunoglobulin I-set domain	PTHR45032	2.1e-18	AgB02_g025_t01-IPRSCAN	IPR013783; IPR036179; IPR013098; IPR007110; IPR013783	Immunoglobulin-likefold; Immunoglobulin-likedomainsuperfamily; ImmunoglobulinI-set; Immunoglobulin-likedomain	N	Too short sequence	-	No					-0.961563	0.00694568
856	AgB02_g026_t02	hypothetical_protein	hypothetical secreted protein precursor - GPI anchored	Secreted / Unknown / GPI			M	910	0	2		17	0	ExpAA=3.38 First60=1.79 PredHel=0 Topology=o	910	0						SIG	20-21	100.198	4.54	97.974	4.51	0.819	3.582	0.007	nuc						AgB02_g026_t02-IPRSCAN	IPR035914; IPR035914	Spermadhesin,CUBdomainsuperfamily	Y	-114.84	-	No					-0.988412	0.00600049
857	AgB02_g027_t04	Metal_transporter_CNNM4	metal transporter CNNM2 isoform 2 (Homo sapiens) - probable fragment - signalP detected - 5 predicted membrane helices	Transporters / membrane	Sigp		M	782	0	3		14	0	ExpAA=86.73 First60=0.29 PredHel=4 Topology=o178-200i230-252o256-273i286-308o	782	4	10.6	83.9	5.5			SIG	20-21	88.551	5.29	86.222	5.17	0.744	2.604	0.005	end	RAARDKR|GL 0.698 *ProP*	PF01595; PF00571	Domain of unknown function DUF21; CBS domain	PTHR12064:SF34	1.9e-164	AgB02_g027_t04-IPRSCAN	IPR000644; IPR002550; IPR000644	CBSdomain; DomainofunknownfunctionDUF21	N	-135.87	-	No					-0.963446	0.0068748
858	AgB02_g028_t01	Mannosyl-oligosaccharide_glucosidase	Unknown product	Unknown			M	90	0	0		0	0	ExpAA=0.50 First60=0.50 PredHel=0 Topology=o	90	0						CYT		10.405	6.82			0.73	2.721	0.005	cyt		PF03200	Glycosyl hydrolase family 63 C-terminal domain	PTHR10412	1.8e-23	AgB02_g028_t01-IPRSCAN	IPR008928; IPR004888; IPR012341; IPR031335	Six-hairpinglycosidasesuperfamily; Glycosidehydrolasefamily63; Six-hairpinglycosidase-likesuperfamily; Glycosylhydrolasefamily63,C-terminal	N	Too short sequence	-	No					-0.866394	0.0116491
859	AgB02_g029_t01	putative_mannosyl-oligosaccharide_glucosidase	Glucosidase I	Carbohydrate Metabolism	KOG	0	M	791	0	3		5	0	ExpAA=22.77 First60=22.74 PredHel=1 Topology=i23-45o	791	1	2.8	94.3	2.9		746	CYT		91.196	6.25			0.644	1.605	0.003	mit		PF03200; PF16923	Glycosyl hydrolase family 63 C-terminal domain; Glycosyl hydrolase family 63 N-terminal domain	PTHR10412	1.7e-217	AgB02_g029_t01-IPRSCAN	IPR004888; IPR031335; IPR031631; IPR008928; IPR038518	Glycosidehydrolasefamily63; Glycosylhydrolasefamily63,C-terminal; Glycosylhydrolasefamily63,N-terminal; Six-hairpinglycosidasesuperfamily; Glycosylhydrolasefamily63,N-terminaldomainsuperfamily	N	-142.02	-	No					-0.97654	0.00640153
860	AgB02_g030_t01	Serine/threonine-protein_kinase_dkf-2	Unknown product	Unknown			L	29	0	0	S(3.25)Y(3.5)	2	0	ExpAA=0.00 First60=0.00 PredHel=0 Topology=i	29	0						CYT		3.425	8.86			#N/A	#N/A	#N/A	nuc						AgB02_g030_t01-IPRSCAN			N	Too short sequence	-	No					-1.03498	0.00465452
861	AgB02_g031_t01	Phosphatidylinositol-4-phosphate_3-kinase_C2_domain-containing_subunit_alpha	Phosphoinositide 3-kinase - probable fragment	Signal Transduction	KOG	2e-54	M	701	0	2		17	0	ExpAA=0.68 First60=0.61 PredHel=0 Topology=o	701	0						CYT		77.302	6.23			0.402	0.75	0.002	nuc	ARNRSNR|AN 0.501 *ProP*	PF00794; PF00792	PI3-kinase family, ras-binding domain; Phosphoinositide 3-kinase C2	PTHR10048:SF64	2.9e-32	AgB02_g031_t01-IPRSCAN	IPR000341; IPR029071; IPR015433; IPR002420; IPR035892; IPR002420	Phosphatidylinositol3-kinaseRas-binding(PI3KRBD)domain; Ubiquitin-likedomainsuperfamily; Phosphatidylinositolkinase; Phosphatidylinositol3-kinase,C2domain; C2domainsuperfamily	N	-102.96	-	No					-0.940267	0.00779933
862	AgB02_g032_t01	phosphatidylinositol-4-phosphate_3-kinase_c2_domain-containing_subunit_alpha	Unknown product	Unknown			M	85	0	0	Q(3.02)	0	0	ExpAA=0.00 First60=0.00 PredHel=0 Topology=o	85	0						CYT		9.964	4.79			0.759	2.776	0.006	nuc		PF02809	Ubiquitin interaction motif			AgB02_g032_t01-IPRSCAN	IPR003903	Ubiquitininteractingmotif	N	Too short sequence	-	No					-0.955157	0.00719221
863	AgB02_g033_t06	Ninein	Unknown product	Unknown			Y	101	0	1		1	0	ExpAA=0.00 First60=0.00 PredHel=0 Topology=o	101	0						CYT		12.041	11.34			0.606	1.932	0.004	nuc	LAIRKRR|LA 0.543 *ProP* ; RKRRLAR|SN 0.608 *ProP* ; VRARKRR|LL 0.602 *ProP* ; VRERKRR|HE 0.663 *ProP*					AgB02_g033_t06-IPRSCAN			N	Too short sequence	-	No					-0.982021	0.0062132
864	AgB02_g034_t01	dna_topoisomerase_2-alpha	dna topoisomerase 2-alpha	Nuclear Regulation	NR	0	M	313	0	0		15	0	ExpAA=27.80 First60=5.61 PredHel=1 Topology=o290-312i	313	1	7	92.7	0.3	1	1	CYT		34.63	6.14			0.795	3.201	0.006	nuc				PTHR37431	8.4e-43	AgB02_g034_t01-IPRSCAN			N	-80.47	-	No					-0.916607	0.00887018
865	AgB02_g035_t05	Dicarboxylate_carrier	Mitochondrial substrate solute carrier domain containing protein	Energy Metabolism	NR	0	M	293	0	1		6	0	ExpAA=61.79 First60=7.53 PredHel=0 Topology=o	293	0						CYT		32.673	9.71			0.586	0.616	0.001	cyt		PF00153; PF00153; PF00153	Mitochondrial carrier protein; Mitochondrial carrier protein; Mitochondrial carrier protein	PTHR24089	2.9e-98	AgB02_g035_t05-IPRSCAN	IPR018108; IPR023395; IPR023395	Mitochondrialsubstrate/solutecarrier; Mitochondrialcarrierdomainsuperfamily	N	-115.13	-	No					-0.974599	0.0064696
866	AgB02_g036_t01	hypothetical_protein	hypothetical secreted protein precursor	Secreted / Unknown			M	131	0	0		3	0	ExpAA=0.23 First60=0.23 PredHel=0 Topology=o	131	0						SIG	27-28	14.915	10.97	12.008	11.16	0.87	2.527	0.005	nuc						AgB02_g036_t01-IPRSCAN			N	Too short sequence	-	No					-0.954413	0.00722138
867	AgB02_g037_t04	lipase_maturation_factor_2	lipase maturation factor 2 - probable fragment - signalP detected - 8 predicted membrane helices	Lipid Metabolism / membrane	NR	0	M	449	0	0		9	0	ExpAA=194.97 First60=20.95 PredHel=7 Topology=i9-31o71-93i100-122o239-261i295-314o347-369i382-404o	449	7	33.6	52.3	14			SIG	31-32	51.452	9.01	47.968	8.95	0.806	3.334	0.007	end		PF06762	Lipase maturation factor	PTHR14463:SF5	3.7e-121	AgB02_g037_t04-IPRSCAN	IPR009613	Lipasematurationfactor	N	-42.84	-	No					-0.955779	0.00716789
868	AgB02_g038_t01	hypothetical_protein	Unknown product	Unknown			S	99	0	1	W(4.53)	4	0	ExpAA=0.00 First60=0.00 PredHel=0 Topology=o	99	0						CYT		11.534	9.69			0.757	2.808	0.006	nuc						AgB02_g038_t01-IPRSCAN			N	Too short sequence	-	No					-0.951443	0.00733909
869	AgB02_g039_t03	C-1-tetrahydrofolate_synthase	Methylenetetrahydrofolate dehydrogenase/methylenetetrahydrofolate cyclohydrolase	Internal Metabolism	KOG	6e-63	M	794	0	1		12	0	ExpAA=0.03 First60=0.00 PredHel=0 Topology=o	794	0						CYT		85.906	8.13			0.392	0.758	0.002	cyt		PF02882; PF00763; PF01268	Tetrahydrofolate dehydrogenase/cyclohydrolase, NAD(P)-binding domain; Tetrahydrofolate dehydrogenase/cyclohydrolase, catalytic domain; Formate--tetrahydrofolate ligase	PTHR43274:SF2	0	AgB02_g039_t03-IPRSCAN	IPR027417; IPR020867; IPR036291; IPR020631; IPR020628; IPR020630; IPR000559; IPR000672; IPR020628	P-loopcontainingnucleosidetriphosphatehydrolase; Tetrahydrofolatedehydrogenase/cyclohydrolase,conservedsite; NAD(P)-bindingdomainsuperfamily; Tetrahydrofolatedehydrogenase/cyclohydrolase,NAD(P)-bindingdomain; Formate-tetrahydrofolateligase,FTHFS,conservedsite; Tetrahydrofolatedehydrogenase/cyclohydrolase,catalyticdomain; Formate-tetrahydrofolateligase,FTHFS; Tetrahydrofolatedehydrogenase/cyclohyd…	N	-190.76	-	No					-0.978458	0.006335
870	AgB02_g040_t01	hypothetical_protein	Protein CBG14590 - cuticle development - molting cycle process - epithelial cell development - probable fragment	Extracellular Matrix	GO	8e-46	M	603	0	0		24	0	ExpAA=16.11 First60=15.68 PredHel=0 Topology=o	603	0						CYT		67.183	6.58			0.483	0.555	0.001	nuc	FRKTVRR|SI 0.535 *ProP* ; VRARTRR|CE 0.619 *ProP*	PF00024; PF00024; PF00024	PAN domain; PAN domain; PAN domain	PTHR22963	4.2e-69	AgB02_g040_t01-IPRSCAN	IPR003609; IPR003609	PAN/Appledomain	N	-126.49	-	No					-0.825973	0.0144977
871	AgB02_g041_t01	Oxidoreductase_dhs-27	17 beta-hydroxysteroid dehydrogenase type 3 HSD17B3	Lipid Metabolism	KOG	9e-76	M	322	0	0		8	0	ExpAA=37.69 First60=22.25 PredHel=1 Topology=i20-42o	322	1	6.8	87	6.2		280	CYT		36.329	8.67			0.537	1.256	0.003	mit		PF00106	short chain dehydrogenase	PTHR43899	3.8e-76	AgB02_g041_t01-IPRSCAN	IPR020904; IPR002347; IPR036291	Short-chaindehydrogenase/reductase,conservedsite; Short-chaindehydrogenase/reductaseSDR; NAD(P)-bindingdomainsuperfamily	N	-138.76	-	No					-0.995638	0.00576872
872	AgB02_g042_t04	poly_-specific_ribonuclease_parn	poly -specific ribonuclease parn	Nuclear Metabolism	NR	0	M	616	0	2		12	0	ExpAA=11.47 First60=0.01 PredHel=0 Topology=o	616	0						CYT		70.685	9.03			0.466	0.935	0.002	cyt		PF04857	CAF1 family ribonuclease	PTHR15092:SF26	2.9e-91	AgB02_g042_t04-IPRSCAN	IPR012337; IPR036397; IPR006941	RibonucleaseH-likesuperfamily; RibonucleaseHsuperfamily; RibonucleaseCAF1	N	-145.8	-	No					-0.975165	0.00644969
873	AgB02_g043_t11	hypothetical_protein	nucleolar and coiled-body phosphoprotein 1-like isoform X2	Transcription Machinery	REFSEQ-INVERTEBRATE	2e-12	M	1050	0	6		15	0	ExpAA=0.00 First60=0.00 PredHel=0 Topology=o	1050	0						CYT		117.329	8.99			0.203	0.398	0.001	nuc	GINRRPR|SS 0.648 *ProP* ; GSIRLKR|WF 0.653 *ProP* ; QMRLKKR|ST 0.512 *ProP*					AgB02_g043_t11-IPRSCAN	IPR013087; IPR013087	ZincfingerC2H2-type	N	-145.22	-	No					-0.887053	0.0104145
874	AgB02_g044_t01	Retrotransposable_element_Tf2_155_kDa_protein_type_1	Unknown product	Unknown			M	108	0	0		5	0	ExpAA=0.00 First60=0.00 PredHel=0 Topology=i	108	0						CYT		12.003	6.49			0.534	1.264	0.003	nuc						AgB02_g044_t01-IPRSCAN			N	Too short sequence	-	No					-0.909799	0.00920449
875	AgB02_g045_t01	solute_carrier_organic_anion_transporter_family_member_4c1	Organic anion transporter - 12 predicted membrane helices	Transporters / membrane	KOG	0	I	699	0	2		27	0	ExpAA=261.04 First60=0.01 PredHel=12 Topology=i73-95o110-132i139-161o194-216i229-251o282-304i349-371o386-408i415-437o544-566i587-606o635-657i	699	12	37.3	32.9	29.8			CYT		76.254	7.19			0.528	1.941	0.004	end		PF03137	Organic Anion Transporter Polypeptide (OATP) family	PTHR11388	1.7e-181	AgB02_g045_t01-IPRSCAN	IPR036259; IPR020846; IPR004156; IPR002350; IPR036058	MFStransportersuperfamily; Majorfacilitatorsuperfamilydomain; Organicaniontransporterpolypeptide; Kazaldomain; Kazaldomainsuperfamily	N	-46.42	-	No					-0.944206	0.00763395
876	AgB02_g046_t01	hypothetical_protein	Unknown product - signalP detected - 7 predicted membrane helices	Unknown / membrane			H	247	0	0	L(5.09)S(5.48)	2	0	ExpAA=151.23 First60=34.74 PredHel=7 Topology=o15-37i44-66o81-103i110-132o147-169i181-203o218-240i	247	7	62.3	24.3	13.4			BL/SIG		25.141	9.31			0.569	2.746	0.005	mit						AgB02_g046_t01-IPRSCAN			N	29.17	38.14	GPCR					-1.17616	0.00215152
877	AgB02_g047_t02	Transforming_protein_p68/c-ets-1	Unknown product	Unknown			M	133	0	0		7	0	ExpAA=0.01 First60=0.00 PredHel=0 Topology=o	133	0						CYT		15.204	9.1			0.85	4.369	0.009	nuc	SDIRRKR|FL 0.531 *ProP*					AgB02_g047_t02-IPRSCAN			N	Too short sequence	-	No					-1.01295	0.00524896
878	AgB02_g048_t05	Transforming_protein_p68/c-ets-1	transcription factor	Transcription Factor	KOG	2e-49	M	328	0	1		11	0	ExpAA=0.00 First60=0.00 PredHel=0 Topology=o	328	0						CYT		37.441	6.75			0.897	5.692	0.011	nuc		PF00178	Ets-domain	PTHR11849	2.3e-78	AgB02_g048_t05-IPRSCAN	IPR000418; IPR036390; IPR036388; IPR000418	Etsdomain; WingedhelixDNA-bindingdomainsuperfamily; Wingedhelix-likeDNA-bindingdomainsuperfamily	N	-127.09	-	No					-0.973215	0.00651857
879	AgB02_g049_t02	Type_I_inositol-1,4,5-trisphosphate_5-phosphatase	Inositol polyphosphate 5-phosphatase type I	Lipid Metabolism	KOG	5e-97	M	481	0	1		13	0	ExpAA=0.02 First60=0.01 PredHel=0 Topology=o	481	0						CYT		55.016	8.32			0.664	1.962	0.004	mit	VSNRMKR|KF 0.518 *ProP*	PF03372	Endonuclease/Exonuclease/phosphatase family	PTHR12997:SF2	1.2e-118	AgB02_g049_t02-IPRSCAN	IPR036691; IPR000300; IPR005135	Endonuclease/exonuclease/phosphatasesuperfamily; Inositolpolyphosphate-relatedphosphatase; Endonuclease/exonuclease/phosphatase	N	-170.21	-	No					-0.977685	0.00636174
880	AgB02_g050_t01	Type_I_inositol-1,4,5-trisphosphate_5-phosphatase	Unknown product	Unknown			M	90	0	0		4	0	ExpAA=0.14 First60=0.13 PredHel=0 Topology=o	90	0						BL	34-35	10.341	9.13	6.459	7.9	0.829	4.232	0.008	nuc						AgB02_g050_t01-IPRSCAN			N	Too short sequence	-	No					-1.01192	0.00527865
881	AgB02_g051_t11	paired_box_protein_pax-6	positive regulation of transcription by RNA polymerase II - cell fate commitment - nematode male tail tip morphogenesis - regulation of cell adhesion - probable fragment	Transcription Machinery	GO	3e-68	M	294	0	3		0	0	ExpAA=0.05 First60=0.00 PredHel=0 Topology=o	294	0						CYT		32.088	9.62			0.551	1.254	0.003	nuc	ARMRLKR|KL 0.690 *ProP*	PF00046	Homeobox domain	PTHR24329	3.3e-57	AgB02_g051_t11-IPRSCAN	IPR001356; IPR009057; IPR017970	Homeoboxdomain; Homeobox-likedomainsuperfamily; Homeobox,conservedsite	N	-167.76	-	No					-0.997143	0.00572161
882	AgB02_g052_t02	hypothetical_protein	Unknown product	Unknown			M	112	0	0		5	0	ExpAA=6.25 First60=6.25 PredHel=0 Topology=o	112	0						CYT		13.291	9.25			0.975	7.351	0.015	exc	MFVRVKR|YN 0.578 *ProP*					AgB02_g052_t02-IPRSCAN			N	Too short sequence	-	No					-1.1011	0.00324366
883	AgB02_g053_t02	hypothetical_protein	Unknown product	Unknown			Q	94	0	0		5	0	ExpAA=0.01 First60=0.00 PredHel=0 Topology=o	94	0						CYT		10.863	9.12			0.872	4.961	0.01	nuc						AgB02_g053_t02-IPRSCAN			N	Too short sequence	-	No					-1.04156	0.00449033
884	AgB02_g054_t02	Guanine_nucleotide-binding_protein_subunit_gamma-e	G-protein coupled receptor signaling pathway - signal transduction - heterotrimeric G-protein complex - signal transducer	Signal Transduction	GO	2e-19	M	64	0	1		1	0	ExpAA=0.00 First60=0.00 PredHel=0 Topology=i	64	0						CYT		7.476	6.55			0.87	4.859	0.01	nuc		PF00631	GGL domain	PTHR15936	7.9e-29	AgB02_g054_t02-IPRSCAN	IPR001770; IPR015898; IPR036284; IPR036284	G-protein,gammasubunit; G-proteingamma-likedomain; G-proteingamma-likedomainsuperfamily	N	Too short sequence	-	No					-0.611533	0.0455088
885	AgB02_g055_t01	hypothetical_protein	Syntaxin-binding protein 2 - integral component of membrane - vesicle docking involved in exocytosis - probable fragment - Membrane anchor detected - 10 predicted membrane helices	Protein Export / membrAnchor / membrane	GO	3e-85	M	341	0	0	C(15.31)V(5.99)	124	0	ExpAA=236.88 First60=47.38 PredHel=10 Topology=i7-29o33-55i67-89o93-115i127-149o153-175i177-199o203-225i245-267o298-320i	341	10	64.5	13.8	21.7			ANC		36.04	7.32			0.846	4.715	0.009	end				PTHR23304	5e-40	AgB02_g055_t01-IPRSCAN			N	65.59	81.09	GPCR					-1.02514	0.00491134
886	AgB02_g056_t01	hypothetical_protein	Unknown product	Unknown			M	93	0	0		3	0	ExpAA=16.99 First60=0.06 PredHel=0 Topology=o	93	0						CYT		10.106	7.7			0.484	0.975	0.002	cyt						AgB02_g056_t01-IPRSCAN			N	Too short sequence	-	No					-1.0136	0.0052305
887	AgB02_g057_t01	hypothetical_protein	hypothetical secreted protein precursor - GPI anchored	Secreted / Unknown / GPI			M	195	0	0		7	0	ExpAA=0.07 First60=0.07 PredHel=0 Topology=o	195	0						SIG	20-21	22.205	5.82	20.122	5.82	0.817	3.851	0.008	nuc						AgB02_g057_t01-IPRSCAN			Y	Too short sequence	-	No					-1.02145	0.00501113
888	AgB02_g058_t01	hypothetical_protein	Unknown product	Unknown			D	200	0	0		11	0	ExpAA=0.30 First60=0.01 PredHel=0 Topology=o	200	0						CYT		23.33	9.59			0.87	4.769	0.01	nuc	IRIRKGR|CQ 0.509 *ProP*					AgB02_g058_t01-IPRSCAN			N	Too short sequence	-	No					-0.899539	0.00973199
889	AgB02_g059_t01	hypothetical_protein	membrane	Uncharacterized	GO	0	M	741	0	3		18	0	ExpAA=0.06 First60=0.05 PredHel=0 Topology=o	741	0						CYT		81.551	6.61			0.532	1.373	0.003	nuc		PF00629	MAM domain, meprin/A5/mu	PTHR21542	6.5e-214	AgB02_g059_t01-IPRSCAN	IPR000998; IPR013320; IPR013320	MAMdomain; ConcanavalinA-likelectin/glucanasedomainsuperfamily	N	-112.41	-	No					-0.954137	0.00723226
890	AgB02_g060_t01	Transposon-derived_protein,_partial	Unknown product	Unknown			M	58	0	0		2	0	ExpAA=0.09 First60=0.09 PredHel=0 Topology=i	58	0						CYT		6.448	7.77			0.837	3.928	0.008	mit						AgB02_g060_t01-IPRSCAN			N	Too short sequence	-	No					-0.770992	0.0194996
891	AgB02_g061_t01	tbc1_domain_family_member_16	Ypt/Rab-specific GTPase-activating protein GYP7 - probable fragment - signalP detected	Signal Transduction / Secreted / Ypt/Rab-specific	KOG	8e-52	S	785	0	3		16	0	ExpAA=7.17 First60=0.03 PredHel=0 Topology=o	785	0						SIG	19-20	89.063	5.14	86.937	5.14	0.624	2.027	0.004	cyt	WSAVKAR|SV 0.556 *ProP* ; QNIRKKR|MK 0.652 *ProP*	PF00566	Rab-GTPase-TBC domain	PTHR22957:SF454	3.4e-246	AgB02_g061_t01-IPRSCAN	IPR035969; IPR000195; IPR035969	Rab-GTPase-TBCdomainsuperfamily; Rab-GTPase-TBCdomain	N	-118.92	-	No					-0.929166	0.00828478
892	AgB02_g062_t01	copine-5	Copine	Signal Transduction	KOG	0	M	648	0	4		13	0	ExpAA=0.01 First60=0.00 PredHel=0 Topology=o	648	0						CYT		74.333	6.37			0.403	0.761	0.002	nuc	GDKRWQR|SY 0.533 *ProP* ; KAKKNKR|YV 0.538 *ProP* ; TSERVRR|LL 0.520 *ProP*	PF00168; PF00168; PF07002	C2 domain; C2 domain; Copine	PTHR10857	1.6e-169	AgB02_g062_t01-IPRSCAN	IPR000008; IPR035892; IPR036465; IPR010734; IPR002035; IPR037768	C2domain; C2domainsuperfamily; vonWillebrandfactorA-likedomainsuperfamily; Copine; vonWillebrandfactor,typeA; Copine,C2Bdomain	N	-131.18	-	No					-0.949674	0.00741009
893	AgB02_g063_t01	hypothetical_protein	Unknown product - 2 predicted membrane helices - GPI anchored	Unknown / membrane / GPI			I	114	0	0	F(3.12)	2	0	ExpAA=34.37 First60=12.65 PredHel=1 Topology=i89-111o	114	1	19.3	2.6	78.1	1	3	CYT		13.137	8.64			0.866	3.432	0.007	nuc						AgB02_g063_t01-IPRSCAN			Y	Too short sequence	-	No					-0.954316	0.00722522
894	AgB02_g064_t01	hypothetical_protein	Unknown product	Unknown			A	116	0	0		3	0	ExpAA=0.01 First60=0.00 PredHel=0 Topology=o	116	0						CYT		13.463	9.89			0.782	3.006	0.006	nuc						AgB02_g064_t01-IPRSCAN			N	Too short sequence	-	No					-0.981383	0.00623482
895	AgB02_g065_t01	hypothetical_protein	Unknown product - signalP detected	Unknown			L	105	0	0	F(3.38)	4	0	ExpAA=23.98 First60=23.94 PredHel=1 Topology=o20-42i	105	1	21	19	60		63	BL/SIG		12.183	8.76			0.739	2.601	0.005	exc						AgB02_g065_t01-IPRSCAN			N	Too short sequence	-	No					-0.707729	0.0273644
896	AgB02_g066_t02	protein_tweety-like_protein_1	intracellular calcium activated chloride channel - volume-sensitive chloride channel - chloride transmembrane transport - chloride channel complex - 5 predicted membrane helices	Transporters / membrane	GO	0	M	565	0	2		14	0	ExpAA=113.63 First60=21.29 PredHel=5 Topology=o40-62i82-104o217-239i246-268o396-418i	565	5	19.5	49.7	30.8			CYT		61.774	6.02			0.204	0.405	0.001	end		PF04906	Tweety	PTHR12424	1.3e-78	AgB02_g066_t02-IPRSCAN	IPR006990; IPR006990	Tweety	N	-39.22	-	No					-0.919344	0.00873922
897	AgB02_g067_t02	hypothetical_protein	hypothetical protein Tcan_06256	Uncharacterized	NR	0	M	356	0	0		11	0	ExpAA=12.90 First60=10.35 PredHel=0 Topology=o	356	0						CYT		39.263	6.07			0.8	3.197	0.006	mit						AgB02_g067_t02-IPRSCAN			N	-93.86	-	No					-1.00951	0.00534856
898	AgB02_g068_t08	Leucine-rich_repeat_protein_soc-2	Serine/threonine phosphatase 2C containing leucine-rich repeats - probable fragment	Signal Transduction	KOG	1e-40	M	454	0	0		6	0	ExpAA=0.02 First60=0.00 PredHel=0 Topology=o	454	0						CYT		50.626	8.76			0.474	0.959	0.002	nuc	FDDRPRR|DL 0.504 *ProP*	PF13855; PF13855	Leucine rich repeat; Leucine rich repeat	PTHR44380	3.6e-173	AgB02_g068_t08-IPRSCAN	IPR001611; IPR032675; IPR003591; IPR003591	Leucine-richrepeat; Leucine-richrepeatdomainsuperfamily; Leucine-richrepeat,typicalsubtype	N	-114.89	-	No					-0.986993	0.0060471
899	AgB02_g069_t01	hypothetical_protein	Unknown product	Unknown			M	145	0	0		7	0	ExpAA=0.04 First60=0.04 PredHel=0 Topology=o	145	0						CYT		16.259	10.47			0.759	2.723	0.005	nuc	ESGRSPR|SG 0.562 *ProP*					AgB02_g069_t01-IPRSCAN			N	Too short sequence	-	No					-0.849778	0.0127462
900	AgB02_g070_t01	hypothetical_protein	Unknown product - 2 predicted membrane helices	Unknown / membrane			L	120	0	0		4	0	ExpAA=36.09 First60=15.08 PredHel=2 Topology=i28-47o91-113i	120	2	34.2	36.7	29.2			CYT		13.809	9.64			0.346	1.242	0.002	cyt						AgB02_g070_t01-IPRSCAN			N	Too short sequence	-	No					-0.999458	0.00564984
901	AgB02_g071_t01	hypothetical_protein	Unknown product	Unknown			R	153	0	0		2	0	ExpAA=0.02 First60=0.00 PredHel=0 Topology=o	153	0						CYT		17.311	9.62			0.767	2.838	0.006	nuc						AgB02_g071_t01-IPRSCAN			N	Too short sequence	-	No					-0.999322	0.00565401
902	AgB02_g072_t02	hypothetical_protein	Unknown product	Unknown			M	69	0	0		1	0	ExpAA=0.40 First60=0.40 PredHel=0 Topology=o	69	0						CYT		8.127	10.01			0.735	2.854	0.006	mit						AgB02_g072_t02-IPRSCAN			N	Too short sequence	-	No					-1.0093	0.00535451
903	AgB02_g073_t01	Acetylcholine_receptor_subunit_alpha-type_deg-3	signal transduction - neuron projection - chemical synaptic transmission - integral component of plasma membrane - nervous system process - - probable fragment	Signal Transduction	GO	1e-40	K	161	0	1		4	0	ExpAA=13.90 First60=13.90 PredHel=0 Topology=i	161	0						CYT		18.571	7.87			0.507	1.355	0.003	nuc	VSVRHIR|II 0.511 *ProP*	PF02931	Neurotransmitter-gated ion-channel ligand binding domain	PTHR18945	7.8e-42	AgB02_g073_t01-IPRSCAN	IPR006202; IPR006201; IPR036734; IPR036734	Neurotransmitter-gatedion-channelligand-bindingdomain; Neurotransmitter-gatedion-channel; Neurotransmitter-gatedion-channelligand-bindingdomainsuperfamily	N	Too short sequence	-	No					-1.01283	0.00525249
904	AgB02_g074_t01	hypothetical_protein	signal transduction - neuron projection - chemical synaptic transmission - integral component of plasma membrane - nervous system process - - probable fragment - signalP detected - 2 predicted membrane helices	Signal Transduction / membrane	GO	8e-26	V	130	0	0		2	0	ExpAA=37.46 First60=37.39 PredHel=2 Topology=i5-23o33-55i	130	2	30.8	7.7	61.5		75	SIG	20-21	14.345	10.49	12.386	10.73	0.618	1.639	0.003	end				PTHR18945:SF557	8.8e-29	AgB02_g074_t01-IPRSCAN	IPR006201; IPR036719	Neurotransmitter-gatedion-channel; Neurotransmitter-gatedion-channeltransmembranedomainsuperfamily	N	Too short sequence	-	No					-0.954374	0.00722291
905	AgB02_g075_t02	putative_g-protein_coupled_receptor	integral component of membrane - membrane - G-protein coupled receptor signaling pathway - signal transduction - G-protein coupled receptor - signal - 7 predicted membrane helices	Signal Transduction / membrane	GO	0	Q	528	0	0		17	0	ExpAA=154.32 First60=13.27 PredHel=7 Topology=o51-73i94-116o143-160i173-195o236-258i294-316o331-353i	528	7	28.2	25.4	46.4			BL	61-62	59.709	8.98	52.775	9.14	0.354	0.705	0.001	end		PF00001	7 transmembrane receptor (rhodopsin family)	PTHR24243:SF23	5.3e-115	AgB02_g075_t02-IPRSCAN	IPR000276; IPR017452; IPR000276	Gprotein-coupledreceptor,rhodopsin-like; GPCR,rhodopsin-like,7TM	N	66.12	69.09	GPCR					-0.910568	0.0091661
906	AgB02_g076_t01	hypothetical_protein	Unknown product	Unknown			M	76	0	0		4	0	ExpAA=20.22 First60=20.22 PredHel=1 Topology=o10-27i	76	1	22.4	13.2	64.5		49	ANC		8.357	9.51	5.155	9.95	0.429	1.025	0.002	nuc						AgB02_g076_t01-IPRSCAN			N	Too short sequence	-	No					-1.05184	0.00424516
907	AgB02_g077_t01	hypothetical_protein	Unknown product	Unknown			S	142	0	0		8	0	ExpAA=0.10 First60=0.09 PredHel=0 Topology=o	142	0						CYT		16.726	9.5			0.905	5.911	0.012	nuc						AgB02_g077_t01-IPRSCAN			N	Too short sequence	-	No					-0.947193	0.00751084
908	AgB02_g078_t01	hypothetical_protein	Unknown product - 2 predicted membrane helices	Unknown / membrane			H	106	0	0		4	0	ExpAA=19.82 First60=0.49 PredHel=1 Topology=i67-89o	106	1	20.8	16	63.2		17	ANC		12.75	9.96			0.497	1.759	0.004	mit						AgB02_g078_t01-IPRSCAN			N	Too short sequence	-	No					-1.00222	0.00556528
909	AgB02_g079_t04	Glycosyltransferase_AER61	glycosyltransferase aer61 - probable fragment	Carbohydrate Metabolism	NR	0	M	298	0	0		5	0	ExpAA=0.24 First60=0.09 PredHel=0 Topology=o	298	0						CYT		34.905	8.73			0.428	0.838	0.002	cyt		PF04577	Protein of unknown function (DUF563)	PTHR20961	4.2e-92	AgB02_g079_t04-IPRSCAN	IPR007657; IPR007657	Glycosyltransferase61	N	-156.94	-	No					-0.914842	0.00895566
910	AgB02_g080_t02	hypothetical_protein	Unknown product - 4 predicted membrane helices	Unknown / membrane			M	249	0	0		6	0	ExpAA=68.56 First60=0.00 PredHel=3 Topology=i111-133o138-160i167-189o	249	3	26.5	26.1	47.4			CYT		28.232	7.03			0.907	5.781	0.012	mit						AgB02_g080_t02-IPRSCAN			N	-67.56	-	No					-0.95383	0.00724433
911	AgB02_g081_t01	hypothetical_protein	Unknown product	Unknown			L	177	0	0	H(14.5)T(6.77)	2	0	ExpAA=0.00 First60=0.00 PredHel=0 Topology=o	177	0						CYT		20.97	12.01			0.369	0.743	0.001	mit				PTHR45134	9.8e-20	AgB02_g081_t01-IPRSCAN			N	Too short sequence	-	No					-0.956913	0.00712377
912	AgB02_g082_t01	hypothetical_protein	Syntaxin-binding protein 2 - integral component of membrane - vesicle docking involved in exocytosis - probable fragment - Membrane anchor detected - 5 predicted membrane helices	Protein Export / membrAnchor / membrane	GO	1e-54	R	186	0	0	C(15.17)V(5.45)	67	0	ExpAA=108.64 First60=38.26 PredHel=5 Topology=o11-33i40-62o67-89i101-123o149-171i	186	5	59.1	22.6	18.3			ANC		19.803	8.42	16.501	8.43	0.172	0.342	0.001	end				PTHR23304	2.1e-14	AgB02_g082_t01-IPRSCAN			N	Too short sequence	-	No					-1.04683	0.00436286
913	AgB02_g083_t01	hypothetical_protein	Unknown product	Unknown			Y	113	0	0	I(3.1)Y(6.29)	3	0	ExpAA=33.87 First60=33.66 PredHel=1 Topology=o20-42i	113	1	19.5	17.7	62.8		71	ANC		13.86	8.9	11.779	8.75	0.516	1.138	0.002	cyt						AgB02_g083_t01-IPRSCAN			N	Too short sequence	-	No					-0.930481	0.00822573
914	AgB02_g084_t02	Myotubularin-related_protein_5,_partial	Phosphatidylinositol 3-phosphate 3-phosphatase myotubularin MTM1 - probable fragment	Lipid Metabolism	KOG	5e-52	M	897	0	2		19	0	ExpAA=0.00 First60=0.00 PredHel=0 Topology=o	897	0						CYT		100.277	7.21			0.369	0.679	0.001	nuc		PF06602; PF00130; PF00169	Myotubularin-like phosphatase domain; Phorbol esters/diacylglycerol binding domain (C1 domain); PH domain	PTHR10807	6e-164	AgB02_g084_t02-IPRSCAN	IPR010569; IPR001849; IPR002219; IPR030564; IPR011993; IPR029021; IPR001849	Myotubularin-likephosphatasedomain; Pleckstrinhomologydomain; ProteinkinaseC-like,phorbolester/diacylglycerol-bindingdomain; Myotubularinfamily; PH-likedomainsuperfamily; Protein-tyrosinephosphatase-like	N	-119.13	-	No					-0.941373	0.0077525
915	AgB02_g085_t01	putative_oxidoreductase_dhs-27	hypothetical protein Tcan_05647	Uncharacterized	NR	0	M	419	0	0		11	0	ExpAA=11.12 First60=0.00 PredHel=0 Topology=o	419	0						CYT		47.142	5.71			0.498	0.996	0.002	nuc		PF07914	Protein of unknown function (DUF1679)	PTHR23020:SF12	6e-100	AgB02_g085_t01-IPRSCAN	IPR015897; IPR012877; IPR011009	CHKkinase-like; UncharacterisedoxidoreductaseDhs-27; Proteinkinase-likedomainsuperfamily	N	-154.9	-	No					-0.890175	0.0102395
916	AgB02_g086_t05	Ras_association_domain-containing_protein_1	Ras GTPase effector RASSF2 - probable fragment	Signal Transduction	KOG	6e-38	M	242	0	0		10	0	ExpAA=0.02 First60=0.00 PredHel=0 Topology=o	242	0						CYT		26.765	5.05			0.762	2.642	0.005	nuc		PF00130	Phorbol esters/diacylglycerol binding domain (C1 domain)	PTHR22738	1.9e-29	AgB02_g086_t05-IPRSCAN	IPR020454; IPR033614; IPR002219; IPR002219	Diacylglycerol/phorbol-esterbinding; C-terminalRASSFfamily; ProteinkinaseC-like,phorbolester/diacylglycerol-bindingdomain	N	-163.37	-	No					-0.891729	0.0101535
917	AgB02_g087_t01	hypothetical_protein	Unknown product	Unknown			M	129	0	0		6	0	ExpAA=0.43 First60=0.12 PredHel=0 Topology=o	129	0						CYT		13.902	6.53			0.455	0.889	0.002	cyt						AgB02_g087_t01-IPRSCAN			N	Too short sequence	-	No					-0.948628	0.0074524
918	AgB02_g088_t01	vesicular_acetylcholine_transporter_unc-17	Vesicular amine transporter - 12 predicted membrane helices	Protein Export / membrane	KOG	0	M	533	0	1		8	0	ExpAA=236.87 First60=22.79 PredHel=12 Topology=i32-54o102-124i131-153o157-179i192-214o224-241i265-287o302-324i337-356o366-388i400-422o427-449i	533	12	48	17.3	34.7			CYT		59.615	5.15			0.457	1.149	0.002	end		PF07690	Major Facilitator Superfamily	PTHR23506:SF13	1.5e-236	AgB02_g088_t01-IPRSCAN	IPR004734; IPR036259; IPR020846; IPR011701; IPR020846	Multidrugresistanceprotein; MFStransportersuperfamily; Majorfacilitatorsuperfamilydomain; Majorfacilitatorsuperfamily	N	-17.81	-	No					-1.00366	0.00552171
919	AgB02_g089_t01	hypothetical_protein	Unknown product	Unknown			R	102	0	0		5	0	ExpAA=0.00 First60=0.00 PredHel=0 Topology=o	102	0						CYT		11.462	9.58			0.805	3.461	0.007	mit						AgB02_g089_t01-IPRSCAN			N	Too short sequence	-	No					-0.91586	0.00890629
920	AgB02_g090_t01	vasopressin_v1a_receptor	vasopressin v1a receptor - probable fragment - 5 predicted membrane helices - GPI anchored	Signal Transduction / membrane / GPI	NR	0	H	219	0	0	W(3.27)	4	0	ExpAA=99.99 First60=22.98 PredHel=5 Topology=o20-42i62-79o94-116i136-154o199-218i	219	5	44.7	36.5	18.7			CYT		25.26	7.87			0.644	1.883	0.004	end		PF00001	7 transmembrane receptor (rhodopsin family)	PTHR24230:SF67	1.5e-86	AgB02_g090_t01-IPRSCAN	IPR000276; IPR017452	Gprotein-coupledreceptor,rhodopsin-like; GPCR,rhodopsin-like,7TM	Y	-118.24	-	No					-0.904529	0.0094718
921	AgB02_g091_t09	Epidermal_growth_factor_receptor_kinase_substrate_8-like_protein_2	Epidermal growth factor receptor kinase substrate 8 - probable fragment	Signal Transduction	NR	0	M	751	0	4		5	0	ExpAA=0.01 First60=0.00 PredHel=0 Topology=o	751	0						CYT		85.014	7.09			0.567	1.238	0.002	nuc	EDKRRGR|SV 0.700 *ProP* ; IAERERR|LI 0.605 *ProP*	PF07653; PF08416	Variant SH3 domain; Phosphotyrosine-binding domain	PTHR12287:SF23	2.1e-175	AgB02_g091_t09-IPRSCAN	IPR001452; IPR011993; IPR013625; IPR033928; IPR006020; IPR036028	SH3domain; PH-likedomainsuperfamily; Tensin/EPS8phosphotyrosine-bindingdomain; Epidermalgrowthfactorreceptorkinasesubstrate,phosphotyrosine-bindingdomain; PTB/PIdomain; SH3-likedomainsuperfamily	N	-134.91	-	No					-0.963131	0.00688662
922	AgB02_g092_t01	hypothetical_protein	Unknown product	Unknown			V	154	0	0		8	0	ExpAA=1.04 First60=0.01 PredHel=0 Topology=o	154	0						ANC		17.305	11.54	12.563	11.5	0.821	3.809	0.008	mit						AgB02_g092_t01-IPRSCAN			N	Too short sequence	-	No					-0.931929	0.00816123
923	AgB02_g093_t01	hypothetical_protein	Unknown product	Unknown			M	77	0	0	W(3.49)	4	0	ExpAA=0.01 First60=0.01 PredHel=0 Topology=i	77	0						CYT		9.338	9.7			0.786	3.176	0.006	cyt						AgB02_g093_t01-IPRSCAN			N	Too short sequence	-	No					-1.00841	0.00538067
924	AgB02_g094_t05	hypothetical_protein	hypothetical secreted protein precursor	Secreted / Unknown			M	141	0	0		3	0	ExpAA=10.47 First60=10.46 PredHel=0 Topology=o	141	0						SIG	25-26	15.573	10.86	12.898	11.16	0.609	1.51	0.003	nuc	TLTRPKR|DG 0.616 *ProP*					AgB02_g094_t05-IPRSCAN			N	Too short sequence	-	No					-0.961844	0.00693505
925	AgB02_g095_t01	protein_phosphatase_1h	Serine/threonine phosphatase	Signal Transduction	KOG	0	M	516	0	1		8	0	ExpAA=0.90 First60=0.10 PredHel=0 Topology=o	516	0						CYT		56.842	4.97			0.627	1.496	0.003	nuc		PF00481; PF00481	Protein phosphatase 2C; Protein phosphatase 2C	PTHR13832	1.4e-115	AgB02_g095_t01-IPRSCAN	IPR015655; IPR001932; IPR036457; IPR001932	Proteinphosphatase2Cfamily; PPM-typephosphatasedomain; PPM-typephosphatasedomainsuperfamily	N	-150.08	-	No					-0.906013	0.00939577
[truncated: 16,976 more rows]
[truncated: 365 more columns]
